# Supplementary material
Source: publisher site journal article supplement (https://www.degruyterbrill.com/publication/isbn/9783110348194/downloadAsset/9783110348194_Index%20lexical.zip)
Supplement: Supplementary file 1 [file index inscriptions et Appendix Probi Partie 3 GGHF.xlsx]

## Sheet: inscriptions et attestations
§ Partie 3	datation (en l'absence de mention explicite, après J.-Chr.)	inscription	attestation	latin classique	localisation	CIL
66.1	2e av. J.-Chr.	pariat pour pareat
66.1	Pompéi	alia pour alea
67, 97, 188, 381	6e siècle (DEAF)		gurga	gurgite
97.2a	époque impériale	vinti pour viginti
97.2a	époque impériale	trienta pour triginta
97.2a	Pompéi		frida	frīgida
97.5	6e ou 7e		ofikina Laurenti
117.3	avant 6e		fecrunt	3p pf °fēcerunt	Gaule
117.3	avant 6e		fecru		Gaule
117.3	avant 6e		socro	soc(e)ru	Gaule
117.3	avant 6e		vincre	vincere	Gaule
181, 259, 291, 370, 372.1	gloses de Reichenau, 8e siècle		helmu	frk °helm
188.1	5e		tōttu
189.1	4e		trocta	tructa
281.1		Madio pour Maio
281.1		Diauolenus pour Iauolenus
281.1		Trogiae pour Troiae
281.1		Genuarius pour jānuārius
281.1		huzus pour huius
281.1		Zesu pour Jesu
281.1		Aiutor pour Adiutor
281.1		ies pour dies
281.1		Congianus pour Condianus
281.1		oze pour hodie
281.1		zebus pour diebus
281.1		Remidium pour Remigium
281.1		iuria pour jurgia
281.1		Ienubam pour Genavam
281.1		septuazinta pour septuaginta
282.2	an 140	Crescentsianus pour Crescentianus
282.2		Vincentzus pour Vencentius
282.2		Tersia pour Tertia
282.2		Monsius pour Montius
282.2		ampiζatru pour amphitheatro
291.3		Solemmo pour Solemno				CIL6 : 28117
300.5	dès 3e	fraumentu pour fragmentu
300.5	dès 3e	fleuma pour phlegma
300.5	an 588		Baisdra	< °Bajs(e)ra < Bax(e)ra (nom propre)
300.8	Ovide, né en 43 av. J.-Chr.	coturnix pour cocturnix
300.8	Plaute, né vers 254 av. J.-Chr.	mers pour merx
300.8	Pompéi	autione pour auctione
300.8	Pompéi	fata pour facta
300.8		cossim pour coxim
300.8		vissi pour vixi
300.8		coius pour coniunx
319.5	183 av. J.-Chr.	Flaus pour Flavus
319.5	Pompéi	Otaus pour Octavus
319.5	an 143	noum pour novum
322.2	an 514	Theuderigo pour Theuderico
322.2	an 514	liticare pour litigare
322.2	2e-3e	Austo pour Augustu
322.2	4e	migat pour micat
322.2	6e	colegare pour collocare
322.2	an 514		(con)jugali
328.1	5e av. J.-Chr.	pocolo pour pocolom
328.3	Pompéi	rumbrun pour rubrum
328.3	Pompéi	quen pour quem
337.1		socera pour socrus			Gaule narbonnaise	CIL XII 2630
337.1		discipu(l)ina pour disciplina			Castlebeards, Bretagne	Eph. Epigr IX 896 ad CIL VII 896

## Sheet: Appendix Probi
§ Partie 3	no App. Pr.	recommandation App. Pr.
212.3	2	tolonium non toloneum
371	5	vetulus non veclus
371	6	vitulus non viclus
97.2a	12	calcostegis non calcosteis
66.1	14	vacua non vaqua
237	23	cithara non citera
319.5	29	avus non aus
179.3	41	acre non acrum
117.3	54	frigida non fricda
66.1	55	vinea non vinia
209.1, 319.5	62	flavus non flaus
66.1	63	cavea non cavia
166.1	76	ansa non asa
300.5	85	pegma non peuma
166.1	152	mensa non mesa
300.8	154	auctor non autor
241.1	165	hirundo non harundo
237.1	166	tonitru non tonotru
319.5	174	rivus non rius
319.5	176	pavor non paor
237.1	177	coluber non colober
328.1	217	passim non passi
