# Supplementary material
Source: publisher site journal article supplement (https://www.degruyterbrill.com/publication/isbn/9783110348194/downloadAsset/9783110348194_Index%20lexical.zip)
Supplement: Supplementary file 1 [file mode d'emploi index lexical GGHF (sauf Partie 3).pdf › mode d'emploi index lexical GGHF (sauf Partie 3).pdf]

## Index lexical

(toutes les Parties sauf la Partie 3)

## Mode d'emploi

L'accès par défaut de l'index est par les entrées, en première colonne. Ces entrées peuvent survenir dans un contexte particulier, qui est indiqué en deuxième colonne : *d'autant que* par exemple sera répertorié sous *autant*, avec la précision (*d'- que*) dans la colonne "contexte".

Suivent trois colonnes qui donnent des informations sur la période (lat., AF, etc.), la langue (l'entrée *azúcar* sera marqué *esp.*) et d'autres attributs (telle la catégorie grammaticale : pour l'entrée *bien*, la colonne "attribut" précisera *adv. concessif*).

L'entrée peut avoir des variantes qui ne justifient pas une entrée séparée. Elles sont indiquées dans les colonnes "variante 1", "variante 2", "variante 3" et "variante 4". Ainsi l'entrée *côté* (contexte : (*d'un -*)) aura les variantes à *côté de* et de *côté de*.

Enfin, la colonne "renvoi à une pagination" indique les numéros de page concernés et la colonne "renvoi à une autre entrée", d'autres entrées de l'index lexical qui renseignent sur le mot en question.

Précisons encore que la colonne "astérisque" qui précède la colonne "entrée" contient, le cas échéant, les signes \* (agrammatical) et ° (reconstruit). Leur séparation du mot auquel ils appartiennent permet le classement alphabétique de celui-ci (ainsi que la recherche incluant le début de mot pour ces items).

L'index lexical est fourni en deux formats : .xlsx (Excel) et .txt (délimité par des tabulations, encodage Unicode). Le format .xlsx permet des recherches automatiques ainsi que le tri par colonne : on pourra par exemple trier en fonction de la colonne "langue", ce qui affichera toutes les entrées en fonction du contenu de cette colonne, etc. Universel, le format .txt permet l'importation de l'index dans le logiciel de choix de l'utilisateur, par exemple dans une base de données, où des recherches automatiques avec des expressions régulières et sur plusieurs colonnes à la fois sont possibles.
