# Supplementary material
Source: publisher site journal article supplement (https://www.degruyterbrill.com/publication/isbn/9783110348194/downloadAsset/9783110348194_Index%20lexical.zip)
Supplement: Supplementary file 2 [file index lexical GGHF (sauf Partie 3).xlsx]

## Sheet: Feuil1
astérisque	entrée	contexte	période	langue	attribut	variante 1	variante 2	variante 3	variante 4	renvoi à une pagination	renvoi à une autre entrée
	a-				préfixe privatif					655
	à	avec complément d'agent								1295-1296
	à	avec complément du nom								999
	à									867-871, 1624-1626, 1627
	à ce point que									1640
	a hore de		AF							1622, 1623
	à la barbe de									1617
	à la tête de									1617
	à savoir					AF: c'est assavoir				1638
	à son cors défendant									854
	à tel point que									1640
	à travers									1623
	a(d)-									1907, 1912
	abattu									1891
	abes, abé									637
	-able		AF							1895
	aboyer				construction					1015
	abricot									1982, 1986
	absous / absolu				participe passé / adjectif					845
	abuser				construction					1026
	-ac									1965
	acceptable									1878
	accepter									1980
	accrocher									1993
	accumuler									1980
	-acé					-acées				1899
	actualité									1884, 1973
	actuellement									1635
	-acu(m)		gaulois			-iacu(m)				1965
	-ade									1968
	adés									1634
	adjudant									1985
	adjutorie		TAF							1977
	ados									1884
	adouber									1976
	adrett			allemand						1994
	adripare		latin							1815, 1875
	adroit									1994
	aduana			espagnol						1983
	aéromotive									1958
	affreux									1993
	afghan, afghane									1991
	aficionado									1985
	afin de									1921, 1922
	afin que									1365
	after-shave									1988
	agar-agar									1991
	-age				suffixe					622, 1846, 1914, 1915, 1916
	agenda									1987
	-agne									1910, 1911, 1912
	aider à qqn									1967
	-aie		AF			-oi				1909, 1910
	aigle									1836, 1837
	aigre-doux									1921, 1926
	aïkido									1991
	ail									1836
	aille				P3 de aller au subjonctif	aut				773
	aim		AF		P1 de amer (ind. ou subjonctif)	aime				750, 758, 784, 808, 833
	aimé je				P1 avec sujet inversé					762
	ainc				négatif					1265
	ains				adverbe					916, 1419, 1426
	ains				P1 de amer	ain	ainz			769
	ains	(- que)								902
	ains / aint		AF		P2 et P3 subjonctif présent de amer					749
	ainsi									1205
	ainsi que									1635
	ainz		jusqu'au 17e s.			ainc, ains	ainçois, ainceis			1639, 1646, 1648
	air				avoir l'-					1160
	airain		FClass							1882
	airbag									1987
	aire		AF							1836, 1847
	airelle									1986
	-ais					-ois				1896, 1968
	aisil		AF, MF							1836, 1847
	-aison									1897
	aïst /aït		AF		P3 subjonctif de aidier					785
	akka			kannada						1868
	al-			arabe						1983
	al / au				enclise	a le				669
	alb			roumain						1870
	albus		LClass							1870
	alcachofa			espagnol						1983
	alchimie									1983
	alcool									1983
	alcun									718	aucun
	aleiz		AF, Est		P5					752
	alemosina		latin pop.							1976
	aleph									1991
	alerte									1984
	alezan									1840
	alezán			espagnol						1840
	alg-					-alg-	-alg			1900
	alge		AF, Ouest		P1 de aller					768, 772
	algèbre									1983
	algodón			espagnol						1983
	Alice									1976
	alissons, alissiens		MF		P4 subjonctif imparfait de aller					830
	aliud		latin							715
	alkékenge									1986
	aller				auxiliaire					2006, 2008
	aller		AF		conjugaison					747, 766, 774, 828, 1835
	aller (+ infinitif)									1484, 1525, 1526, 1822
	allume-cigare									1922
	almacén			espagnol						1983
	almosne		TAF							1976
	alors					lors				1637, 1639, 1640, 1641, 1647
	alose									1965
	alouette									1965
	alquant		TAF, AF							722
	als / aus / as				enclise	a + les	as	aus		669
	altesse									1974, 1984
	altezza			italien						1974
	altiligérien									1982
	altre		TAF, AF							720	autre
	amanevir		TAF							1977
	amare		latin		conjugaison					778, 847
	amasser				construction					1024
	amauissem		latin		subjonctif plus-que-parfait de amare					829
	ambassade									1984
	ambedui		TAF, AF							728
	ambes		TAF, AF							728
	ambure		AF			ambore				1657, 1658
	amen		TAF							1976
	-âmes		18e s.		P4 désinence parfait accent circonflexe					823	-âtes
	amez		AF		P5					655
	amiral									1983
	-ammant / emment				suffixe					800
	amoit		AF		P3 imparfait de amer	amoyt	aimoitaimoyt			784
	amok									1991
	amont									1634
	amor		AF		nom fénimin					1876
	amour		FMod		nom masculin					1876
	amour	(por - que / de)								880-881, 1384
	an									1836
	analyse									1979
	ananas									1986
	anarchie									1980
	anarchiste									1994
	-ance									1897
	anchois									1985
	ancien									1889
	anciennement									1635
	Andillac									1965
	Andilly									1965
	andui									728
	aneme		TAF			aname	anema			1977
	anémomètre									1901
	ânerie									1845
	angele		TAF							1977
	angiologie									1901
	angiologue									1901
	anglais									1968
	aNNa			kannada						1868
	anneau									1836
	anpreu		AF							727
	-ant		latin		désinence P6	-ent	-unt	-iunt		753
	-ant				suffixe					628-629
	-ant, ante / ent, entes									654
	anté-									1909
	ante, antain				nom fem.					639
	antédiluvien									1889
	anthropomorphe									1900
	anti-									1981
	anticiper				construction					1017
	antidémocratique									1994
	antirépublicain									1994
	antirévolutionnaire									1994
	Antony									1965
	aostare			sarde						1856
	août									1836
	apéritif									1994
	appartement									1984, 1993
	appel à longue distance			Canada						1988
	appel interurbain									1988
	applaudir									1980
	apprendre				construction					1035
	approcher				construction					1014
	approfondir									1980
	apren		AF		P2 impératif					775
	après									1634, 1635, 1812, 1835
	après-									1908, 1909
	aptitude									1931
	aquabike									1992
	aquaplaning									1987
	aquarelle									1985, 1993
	aqueux									1899, 1901
	aquilin									1837
	arabesque									1968, 1984
	arbre									1836
	arbre(s)									635, 639
	arbu			sarde logoudorien						1870
	arcade									1984
	arc-en-ciel									1921, 1922
	archi-									1908, 1981
	architecte									1984
	architecture									1984
	-ard									1968, 1976
	ardant / ardent		FMod		participe présent / adjectif					853
	ardoir > ardre		15e s.		infinitif					849
	-are		latin très tardif		désinence infinitive de verbes germaniques					847
	aréere			sarde		arreiri				1866
	areine		AF							1865
	arēna		LClass							1865
	-arent		15e-16e s.		P6 parfait verbes en -ER	-erent				823-824
	argenz				cas sujet singulier					634
	argumenter				construction					1028
	ariette									1985
	aristocrate									1845
	aristocratie									1980
	-ariu- / aria-				suffixe					731
	arme									1836
	Arnaud									1976
	arpège									1985
	arpent									1965
	arrête-bœuf									1924
	arrière-									1909
	arriver									1835, 1875
	arrosage				‘spam‘					1988
	arsenal									1983, 1984
	artichaut									1982, 1983
	artisan									1984
	as				préposition + article défini					669
	ascouter		AF, MF							1836, 1847
	ashram									1991
	aspre(s)									635
	-asque									1968
	assassin									1983
	āter		LClass							1870
	-âtes				P5 désinence parfait accent circonflexe					823	-âmes
	attaquer									1984
	attendre sur qqn									1967
	attendu que									1381
	attenter				construction					1019
	attitude									1985, 1993
	au / aus / aux				préposition + article défini					634
	au cœur de									1617
	au coin de									1619
	au contraire									1648, 1649
	au dos de									1616
	au fait									1645, 1646, 1647
	au fond									1638
	au lieu de									1620
	au milieu de									1620
	au nez de									1617
	au pied de									1617, 1620
	au point que									1640, 1641
	au sein de									1617
	au travers (de)									1620, 1623
	aucun									635, 1263, 1688-1693
	-aud									1968, 1976
	au-dessous de									1619
	Auge			allemand						1982
	Augenarzt			allemand						1982
	aujourd'hui									1634, 1635, 1820, 1824
	aurai				futur de avoir	arai	auray			799
	auray		MF		futur de avoir					809
	auré				futur de avoir					801
	auricula		latin parlé							1891
	auris		LClass							1891
	aus / as / iaus				pronom personnel					636	els, eus
	aussi	(- comme)								1439
	aussi	(- que)								1439
	aussi									918, 1635
	autant	( - comme)								1436
	autant	(d' - que)								1381
	autant	(pour - que)								1381
	autant									918
	auteure									660	CORR
	auto-									1981
	autobus									1876, 1883
	autocar									1883
	automobile									1883
	autonome				(informatique)					1949, 1951, 1952
	autorité									1979
	autre									1835
	autre (li)									684
	autrement dit									1638
	aux mains de									1617
	aval									1634
	avaler									1943, 1944
	avant									1634, 1635
	avant-									1908, 1909
	avant que									2007
	avant-scène									1908, 1921
	avatar									1991
	ãvẽ			angevin						1830
	avec cela									1635
	avion									1835
	avïum		AF		P4 de avoir à l'imparfait					780
	avocat									1985
	avocate									661
	avoi		16e s.		P1 de avoir	avois				786, 1637
	avoie / avoies		AF		conjugaison					779
	avoir				auxiliaire verbes composés					836-838	estre, être
	avoir				conjugaison					760, 772, 776
	avoir eu déjeuné		12e s.		infinitif passé surcomposé					838
	avoir l'air				verbe copule					1159-1160
	avoir les mains vides									1876
	avois				P1 de avoir					788
	avomes		AF		P4					752
	avril									1836
	avrille		AF, MF							1836, 1847
	avrunt		AF Ouest		P6 futur dialectal					792
	avunculus		LClass							1861, 1875
	awra		AF		P3 futur	avois				789
	ayudar a alg.			espagnol						1967
	ayurvéda									1991
	azafrán			espagnol						1983
	azúcar			espagnol						1983
	babiller									1885
	bâbord									1990
	baby									1974, 1988
	baby-boom									1988
	baby-sitter									1988
	bad			anglais						1876, 1891
	badge									1987
	badiane									1991
	badinage									1846
	bagarre									1991
	bagatelle									1839
	bagnole									1963
	baguette									1994
	bahut									1993
	baisser					baissier (AF)				1943, 1944, 1945
	baisser les prix									1888
	balafon									1991
	balcon									1984, 1993
	baldaquin									1984
	ballade									1984
	ballerine									1842
	ballet									1984
	balustrade									1984
	bamboula									1991
	ban									1976
	banana split									1988
	banane									1986
	banc		TAF							1977
	banc									1975
	bandit									1985
	bannier									1976
	bannière									1976
	banque									1984
	banqueroute									1984
	baragouin									1989
	bărbat			roumain						1872
	barbe									1836
	barbecue									1988
	barde			champenois						1830
	baron									1975
	baroque									1990, 1993
	barricade									1984
	base-ball									1987
	-bashing									1992
	basket				‘basket-ball‘, ‘chaussure de sport‘					1987
	basketball					basket-ball	basket			1955, 1987
	basket-ball			anglais						1955
	basmati									1991
	basse-cour									1921, 1922
	bataillon									1984
	bâtiment									1878
	bâtir									1878, 1975
	bătrîn			roumain						1869
	battre									1836
	bavarder									1885
	bave					beve				1836
	baver									1885
	bazar									1991
	beat									1987
	beau									1610
	beau-									1922
	beaucoup									58-60, 921, 926-929, 1609-1612, 1835, 1848, 1866, 1867, 1921, 1922, 2010
	bébé-									1904, 1907
	bebop									1883
	bec									1965
	-bec									1976
	because				préposition					878
	bechamel			anglais						1995
	bechamel	(salsa -)		espagnol		bechamela	besamel	besamela		1995
	béchamel	(sauce -)				béchamelle				1994, 1995
	Béchamelsoße			allemand		Béchamelsauce				1995
	bed and breakfast									1988
	beden			turc						1861
	beef			anglais						1868
	beef steak			anglais						1958
	beige									1977
	belette					belete (AF)				1816, 1876
	belle-mère									1921
	bellezor									645
	bélouga									1990
	belvédère									1984
	ber / baron									637
	berceau									1965
	bercer									1965
	béret									1965
	bergamasque									1968
	berge									1965
	berline									1883
	Bernard									1976
	Berthe									1976
	Bertrand									1976
	besciamella			italien		balsamella	béchamel			1995
	best-seller									1987
	betterave									1847
	beur			verlan						661
	beurre									1965
	bezzu			sarde logoudorien						1869
	bianco			italien						1870
	bicycle									1974
	bicyclette									1841, 1883
	bief									1965
	bien				adverbe concessif					1388
	bienfaire									1923, 1926
	bienfaisant									1926
	bienveillant					bienveuillant				1926
	bifteck									1958, 1969, 1988
	big-bang									1988
	bigouden, bigoudène									1989, 1991
	bijou									1989
	bilan									1984
	biniou									1989, 1991
	bis									1812
	bistrot									1849
	bizarre									1993
	bizness									1974
	black									1988
	black-jack			anglais						1974
	black-jack					blackjack				1974, 1988
	black-out									1988
	blaireau									1964
	blanc									1838, 1870, 1976, 1977, 1978, 1993
	blanchir		FMod		infinitif en -ir pour verbe à base adject.					852, 1994
	blanco			espagnol						1870
°	blank		germanique							1977
	blank			allemand						1978
°	blao		francique							1977
	blasphémer				construction					1015
	blé									1875, 1880, 1881, 1887, 1976
	blesser									1976
	bleu									1976, 1977, 1978, 1993
	bleuet									1986
	bleu-gris									1921
	bleu-lavande									1926
	blini									1990
	blog									1987, 1991
	blond									1975
	blue jean					blue-jeans				1974, 1988
	bluff									1988
	blush									1988
	bobologue									1905
	bodybuilding									1987
	bœuf									1868
	bœuf bourguignon									1994
	Boileau									1924
	boire				construction, ‘absorber un liquide‘, ‘boire de l'alcool (en excès)‘					1287, 1836, 1937, 1982
	bois									1871, 1976
	boisseau									1965
	boîte									1878
	Bolbec									1976
	bolchévique					bolchevik				1842, 1843, 1990
	boléro									1985
	bombe									1984
	bómbere			sarde logoudorien						1864
	bon					ben				1637, 1835
	bonde									1965
	bonjour									1322
	bonsaï									1991
	bonze									1991
	boom									1988
	boomerang									1991
	boost									1992
	bord									1993
	borderline									1988
	borne									1965
	bortch									1990
	bosco			italien						1871
	bosque			espagnol						1871
	boss									1987
	bossanova									1990
	bouc									1965
	bouche									1835
	boucher									1876
	boucherie									1876
	bouddha									1991
	boue									1838, 1965
	bouffon									1974, 1984
	bouger				construction					1044
	bougette									1987
	bouillu --> boulli		16e s.		participe passé analogique					846
	boule				‘tête‘					1885
	bouleau									1965
	bouledogue									1974
	bouleverser									1921, 1923
	boulingrin									1974
	boulodrome									1905
	bourbe									1965
	boussole									1984
	bout									1993
	bowling									1987
	bowling-green			anglais						1974
	boxe									1987
	boxer-short									1988
	braca		latin			bracae				1965
	brache			italien						1965
	braga			espagnol						1965
	braga			portugais						1965
	braie					braies				1965
	bras									639, 1835
	brasser									1965
	bravade									1984
	bravoure									1984
	breakfast			anglais						1890
	bref									1638
	bricum		TAF							1977
	brief			anglais						1957
	briefer									1957
	briefing									1987
	briément									654
	brigade									1984
	brigand									1984
	brillant									1993
	briller									1984
	Brioche			allemand						1995
	brioche			anglais						1995
	brioche			espagnol						1995
	brioche			italien		brioscia				1995
	brioche									1994, 1995
	briser				construction					1039
	bronze									1882, 1984
	brouette									1883
	brouillard									1866
	brume									1836
	brun									1975, 1977, 1978
°	brūn		germanique							1977
	brunch									1988
	brunie		TAF							1977
	brun-vert									1920, 1921, 1926
	brushing									1988
	bruyère									1965
	budget			anglais						1987
	budget									1987
	buffone			italien						1974
	bug									1883, 1987
	building									1842
	bull-dog			anglais						1974
	bulldozer									1987
	bungee-jumping									1987
	bureau									1807
	bureaucratie									1994
	burel		AF							1807
	burger									1988
	burlesque									1968, 1984
	burnout									1987
	bus									1876, 1883
	business									1987
	businessman									1906
	buste									1984
	busuin		TAF							1977
	busuinos		TAF							1977
	ça				pronom neutre					699-701, 1138, 1269, 1275, 1277-1278, 1599, 1600
	çà				adverbe spatial					699
	cabale									1991
	cabaret									1993
	cabeça			portugais						1857, 1859
	cabeza			espagnol						1857, 1859
	cabinet									1888
	cabinet de toilette									1888
	caboche									1885
	cabriolet									1883
	cacahuète									1985
	cacao									1985
	cachar			occitan						1866
	cachemire									1991
	caddie									1987
	cădea	(a -)		roumain						1867
	cadere		LClass							1866
	cadere			italien						1867
	cadhuna									720
	cadre									1984
	caelum		LClass							1851, 1852, 1857, 1864
	caer			espagnol						1867
	café									1985, 1993
	café au lait									1994
	caillou									1843
	caïman									1985
	cair			portugais						1867
	cajoler				construction					1026
	calebasse									1985
	calèche									1883
	calenge		AF			chalenge				1987
	calf			anglais						1868
	calife									1983
	câlinothérapie									1905
	call-girl									1962
	calorimètre									1900
	camarade									1985, 1993
	cambiare		latin							1965
	cambiare			italien						1965
	cambo-		gaulois							1965
	Cambrai									1965
	caminho			portugais						1965
	camino			espagnol						1965
	camion									1849, 1883
	camionnette									1883
	camisa			espagnol						1965
	camisa			portugais						1965
	camisia		latin							1965
	cammino			italien						1965
°	camminus		latin							1965
	campagnard									1968
	campanile									1985
	canaille									1984
	cancérigène									1981
	candidus		LClass							1870
	canere		LClass							1867, 1869
	canin									1982
	cannelloni									1985
	cannibale									1985
	canon									1984
	canonnade									1984
*	cantasti		latin tardif		P2 parfait de cantare					814
	cantate									1985
	cantatrice									1985
	cantilène									1984
	canto	conjugaison	latin							748
	cap			catalan						1852, 1857
	cap			occitan						1852, 1857
	cap			roumain						1852, 1857
	capello			italien						1870
	capillus		latin							1870
	capital									1837
	capitalisme									1844
	capo			italien						1852, 1857
	caporal									1984
	capriccio			italien						1974
	caprice									1974, 1984
	caput		LClass							1851, 1852, 1857, 1858, 1859, 1864, 1882, 1884
	car				syntaxe	AF: quar/kar/qar/ker/quer.cor/kor				1211-1212, 1370, 1639, 1641, 1642, 1643, 1835, 1883, 1987
	carafe									1982
	carambole									1986
	caraméliser									1994
	caravelle									1990
	carciofo			italien						1983
	carême					caresme				1836
	cari									1991
	caribou									1990
	carlingue									1976, 1991
	Carnac									1965
	carnaval									1984
	carnavalesque									1968
	carne			espagnol						1861, 1871
	carne			italien						1861, 1871
	carne			roumain						1871
	caro		LClass							1865, 1871
	carotte									1847
	carre			sarde logoudorien						1861, 1865, 1871
	carro			espagnol						1965
	carro			italien						1965
	carro			portugais						1965
	carrosse									1883
	carrosse de diligence									1883
	carrus		latin							1965
	cartoccio			italien						1974
	carton									1993
	cartouche									1974, 1984
	cartre		TAF			cartra				1976
	cas	(en / au - que)								1409
	cāseus		latin							1859
	casher									1991
	casque									1985
	casquettifère									1905
	casse-noix									1924
	casser				construction					1039
	casserole									1994
	cassis									1986
	castagnette									1985
	casting									1987
	catholique									1993
	cattivo			italien						1866
	causa		latin							1982
	cause	(à - de)								865, 1982
	cause	(à - que)								1383, 1982
	cause	(pour - de)								882, 1982
	causette									1973
	cavalerie									1984
	ce				pronom démonstratif neutre, syntaxe					1012, 1135, 1154, 1269, 1275, 1277-1278, 1572-1577, 1835
	ce / cette / ces				genre au pluriel					662
	ce / cette / ces									649
	ce disant									855
	ce N de !									1325
	ce n'est pas ma tasse de thé									1967
	ce que				exclamation					743
	ce que	initial de proposition								1016-1018
	ceată			roumain						1866
	ceci									699, 1597
	cédille									1985
	cel			catalan						1852, 1857
	cel			occitan						1852, 1857
	cel- (voir cil)									9	cil
	cela									1597
	cele / celi / celui / celes / cels									693
	célébrité									1963, 1972, 1973
	celle fin (à)									696
	celles qui (les)									703
	celui				pronom démonstratif, syntaxe					694-696, 733, 1008-1011, 1597-1599
	cependant					ce pendant				919, 1052, 1424, 1646-1650, 2008
	cependant que				temporel					1424
	cer			roumain						1852, 1857
	cerise									1986
	certain									1606-1609
	certaineté		MF							1980
	certains									725, 1609, 2009
	certes		FMod							1648
	certes (adverbe)									1212-
	certitude									1931, 1980
	cervelas									1984
	cervoise									1965
	cessez-le-feu									1845
	cest(e) / cesti / cestui / cez									693, 733
	c'est-à-dire					AF: ce est a dire				1638
	cet-									9
	cette-ci / -là									696
	cettui									697
	céu			portugais						1852, 1857
	-ch			Nord	désinence P1					751
	chacun									60
	chagrin									1991
	chaîne									1836
	chair									1836, 1838, 1861, 1865, 1871
	chaise à porteurs									1883
	challenge			anglais						1987
	challenge									1987
	chambellan									1968, 1976
	chamberlenc		TAF							1968
	Chambéry									1965
	Chambord									1965
	chamois									1964
	champagne									1994
	champignon									1994
	changer									1965, 1993
	Chanteloup					Canteloup	Canteleu			1924
	chanter									1836
	chanteur									1882
	Chantilly									1965
	chantourner									1923
	chantre		FClass							1882
	chantre / chanteur									653
	chapel									655
	chapska									1990
	chaque									56, 60
	char		AF			charn				1865
	char									1883, 1965
	charger					chargier (AF)				1929, 1930, 1932, 1936
	chariot									1883
	charité									1980
	charlatan									1974
	Charles									1976
	charme									1836
	charpente									1965
	charrette									1883
	charrue									1965
	charta		grec							1976
	chascun									720-721
	chasque									721
	chasse-neige									1920, 1921
	chastel									655
	chat				‘communication sur internet‘	tchat				1949, 1950, 1963, 1970, 1972, 1973, 1987
	chat			anglais	nom ‘communication sur internet‘					1949
	chat			anglais	verbe ‘chatter‘					1963
	chat	(faire un -)								1963
	châtaigne									1836
	Châteaudun									1925, 1965
	Châteauroux									1976
	chatel		AF			chael	chetel			1980
	chatter									1963
	chauffe-biberon									1924
	chauffe-plat									1922
	chaussettegate									1992
	chaussure									1882
	checklist			anglais						1962
	check-list					check list	checklist			1962, 1988
	check-up									1988
	chef									1836, 1837, 1852
	chel / cheul(e)			picard						702
	chelu			sarde						1852, 1857
	chemin									1965, 1993
	chemise									1965
	chêne									1965
	cheoir		AF							1866
	cheptel									1980
	cher									1838
	chercher					cerchier				1836
	chercheuse									661
	cherrai				futur, cond de cheoir					808
	cheu			rhéto-roman						1852, 1857
	cheval									1836, 1982
	chevalet									1813, 1875
	chevaucher									1836
	cheveu									1870
	cheville									1837, 1840
	chèvre									1838
	chewing-gum									1988
	chez					AF : chiés				1483, 1615, 1616, 1619
	chiasse									1889
	chic			allemand	adjectif	schick				1995
	Chic			allemand	nom masculin	Schick				1995
	chic			anglais						1995
	chic			espagnol						1995
	chic			italien		schicche				1995
	chic									1994, 1995
	chief	(el - de)				au chef de				1617
	chief		AF							1852, 1858, 1883, 1884
	chien									1982
	chiffon									1994
	chiffre									1983
	chignon									1994
	chimie									1983
	chimpanzé									1991
	chips				nom fénimin singulier					1956
	chocolat									1835, 1841, 1985
	choir									1836
	chopine									1970
	chorizo									1985
	chose									1982
	chou									1881, 1889, 1989
	chou blanc									1875
	chou chinois									1875
	chou de Bruxelles									1875
	chou frisé									1875
	chou rouge									1875
	chouchen									1991
	choucroute									1889, 1989
	chou-fleur									1875
	chouia					chouïa	chouya			1983
	chou-rave									1875
	chouraver									1991
	chourin									1841
	chrétien									1993
	ch't'			picard	démonstratif					702
	-ci									1574, 1575, 1598
	ci (particule)									697, 699	là
	ciarlatano			italien						1974
	cicerone									1985
	-cide									1900, 1908, 1981
	ciel									1852, 1857
	cielo			espagnol						1852, 1857
	cielo			italien						1852, 1857
	cigare									1985
	ci-joint									697
	cil		AF, MF		déterminant					1566-1574
	cil		AF, MF		pronom					1591-1597
	cil / cel / celui / cels / ceus / icil…									693
	ciné-club									1906
	cînta	(a -)		roumain						1869
	cire									1965
	cis / ce / ces									695-696
	cist		AF, MF		déterminant					1566-1574
	cist		AF, MF		pronom					1591-1597
	cist / cest / cestui / cez / icist…									693
	cist meon fradre		9e s.		Serments de Strasbourg					991, 1189, 1519, 1569, 2005
	citadelle									1984
	cité									637
	citer									1980
	citron				‘tête‘					1885, 1986
	claie									1965
	clairvoyant									1925
	clamer									1836
	claustrophobie									1845
	clavicule									1837, 1840
	clé									1836
	clebs									1983
	clic	(faire -)								1963
	click			anglais	verbe					1963
	clip			anglais						1970
	clip									1970
	clips				nom masculin singulier					1956
	cliquer									1963
	clofermer									1923
	clofichier		AF			claufire				1879
	club					pluriel clubs				1963, 1974
	coach									1987
	coca									1985
	coche									1883
	cochenille									1985
	cocher									1993
	cohue									1991
	coiffer									1931, 1935
	coiffeur									1931, 1935
	coing									1986
	coisir		TAF							1977
	colère									1882
	collier									1994
	colonel									1984
	combien				adverbe concessif					732-734, 743, 1388
	combien que									1389
	combler									1982
	comes / comitem		latin							638
	comme				causal					1373
	comme				comparatif					1329
	comme				temporel					1422
	comme									732, 743, 1323, 1835
	comme ainsi soit que									1392
	comme que									1391
	comment allez-vous?									1929
	comment que									1391
	compain, compagnon		AF							637
	comprendre									1891
	con-									1912
	conca			sarde						1857, 1859
	concave									1980
	concavité									1980
	concernant				préposition					876
	concert									1984
	condition	(à - que)								1411
	confiance									1980
	confidence									1980
	confiscation									1980
	confisquer									1980
	conflar			occitan						1865
	conglomérer									1981
	congratuler				construction					1034
	connecter									1981
	conseiller				construction					1035, 1285
	consentir				construction					1017
	considéré que									1381
	considérer									1980
	constater									1981
	construire des châteaux en Espagne									1823
	contact lenses			anglais						1967
	container									1987
	contouring									1992
	contra		TAF							1976
	contralto									1985
	contrarier				construction					1031
	contre-									1908, 1922
	contrebalancer									1921
	contrebande									1984
	contrebasse									1984
	contredanse									1974
	contredire				construction					1032
	contribuer				construction					1026
	contumélie		MF							1980
	contusion									1980
	converger									1981
	cookie				‘biscuit rond‘					1988
	cookie			anglais	‘cookie informatique‘					1951, 1952
	cool									1889, 1988
	coolos									1889
	copain / compagnon									653
	copeteste		MF							1875, 1879
	coq au vin									1994
	coq d'Inde									1885
	cordite									1842
	corre / courre > corir / courir		13e-16e s.		désinence infinitive refaite					851	querre
	corrida									1985
	cors (nom masculin)									640
	cors (ses-)				‘lui-même‘					689, 1472
	corsage									1994
	corsitude									1931, 1932
	cortège									1984
	coste									1617
	costume									1984
	côté	(d'un -)				à côté de	de coté de			1617, 1794-1797
	coton									1982, 1983
	cotone			italien						1983
	cottage									1974
	cou									1885
	coudon									1637
	coudrier									1965
	country-dance			anglais						1974
	coup									1610, 1885
	coupe-gorge					cope-gorge (AF)				1875, 1879, 1924
	coupe-papier		FMod							1875
	coupole									1985
	courroux		FClass							1882
	courtisan									1984
	courtiser									1984
	couscousgate									1992
	coût									1885
	couvre-cerveau			Ronsard						1924
	couvre-chef									1882
	cover-girl									1962
	cow			anglais						1868
	cow-boy									1988
	coxa		LClass							1809
	cracher				construction					1017
	craindre									1836, 1866
	crayon									1814
	créature									1979
	crédit									1984
	crème brûlée									1994
	cremut				P3 parfait de criembre					813
	crêpe									1994
	crépuscule									1981
	crerai									809
	cresson									1976
	criembre		AF							1866
	crier				construction					1015
	criminel									1979
	crique									1976
	croi		AF		P1	croy	crois			751
	croirai									809
	croire									1836
	croissant									1994
	croître									1836
	croiz				nom féminin					639
	croquette									1994
	crouler				construction					1042
	croûte									1881, 1889
	crouton									1994
	croye	(qu'il -)			P3 de croire au subjonctif					774
	cruciforme									1905
	crui		AF		P1 parfait de croire					819
	crumble									1988
	c't'		FMod oral							701
	cuedrai				futur de cueillir					808
	cuens / conte, comte									638
	cueudrai				futur de cueillir					808-809
	cui									733, 737
	cuidai		AF		P1 du parfait de cuidier	quidai				812
	cuide		AF		P3 de l'indicatif présent de cuidier	P1 cuit	P2 cuides			754
	cuidier									1835
	cuillère à café									1921, 1922
	cuisons									749
	cuisse									1809
	cul									1836
	cumulare		latin							1982
	cumuler									1982
	curare									1985
	čuri			roumain						1841
	cystohystéropexie									1900
	d'abord									1635
	d'ailleurs									1639
	dan									1991
	dancing									1955, 1956
	danois									1968
	dans									869-870
	dans le dos de									1617, 1618
	danser				construction					1287
	dard									1976
	dare		LClass							1865
	darne									1989
	datte									1986
	d'autre part									1635, 2011
	day-school			anglais						1962
	day-school									1962
	de				article partitif					673, 989-990, 1624-1626, 1628-1629
	de				avec comp. d'agent					1295-1296, 1624-1626, 1628-1629
	de				préposition					867-871, 1624-1626, 1628-1629
	dé-				préfixe privatif	dés-				657, 1907, 1912
	de ce fait									1640, 1641, 2009
	de façon que					de manière que	de mode que			1641
	de fait									1644, 1645
	de la				article partitif					665, 673
	de l'Amérique du Nord									1968
	de l'autre									1635
	de l'autre côté									1635
	de même					mêmement				1635
	de par				préposition					879-880
	de plus									1639
	de sorte que					de façon / manière / mode que	en sorte / façon / manière / mode que			1640, 1641
	de surcroît									1639
	de telle sorte que					de telle façon / manière /mode que	en telle sorte / façon / manière / mode que			1640
	de toute façon									1634, 1638
	de toutes façons									2011
	dea					diva				1637
	dealer									1987
	debrief			anglais						1957
	débriefer									1956, 1957
	début									1993
	deci				préposition					874
	décolleté			anglais						1995
	décolleté			italien						1995
	décolleté									1994, 1995
	décoration									1878
	décorer									1878
	dedans				préposition					876
	déduction									1980
	defendere		latin							1818
	défendre									1818
	definitely			anglais						1988
	définitivement			Canada	‘certainement‘					1988
	deflation			anglais						1962
	déflation									1962
	dégrader				construction					1023
	déjeuner									1817, 1890, 1891
	dèke			sarde						1837
	Dekolleté			allemand		Dekolletee				1995
	del				enclise					669	préposition + article défini
	délibérer				construction					1016
	demain									1929
	demande				nom en interrogation indirect					1358
	demandeiz		AF, dialectal Est		P5					752
	démocratie									1901, 1980
	démocratisation									1994
	démodé									1889
	demourer		MF							1980
	dent									1836
	dépendre				construction					1026
	dépit	(en - de)								883
	depuis que				causal					1379
	depuis que				temporel					1425
	dératiser									1876
	dermatologue									1982
	dernièrement									1635
	déroger				construction					1017
	derviche									1991
	des				enclise					669	préposition + article défini
	désarmer				construction					1024
	descendre									1943, 1944, 1945
	desch			rhéto-roman		diesch				1837
	deschevauchier		AF, MF							1836, 1847
	desgeüner									1817
	design-attitude									1906
	desimes		AF Nord, Est		parfait sigmatique					816-817
	desimes > deïmes		AF							817
	desjune		AF		P3 de disner					755
	desport		AF							1987
	dessert									1994
	dessiner									1993
	dessous									1633, 1634
	dessus									1634
	destre		AF							1864
	destro			italien						1864
	destruirent		MF		P6 parfait de destruire					828
	destruistrent		AF, MF		P6 parfait de destruire					826
	détachable									1845
	dets			gascon						1837
	dette (<debita)		AF		nom féminin					842
	detz			occitan						1837
	deu				article part	dou				673
	deu			catalan						1837
	deü (<*debutu)		AF		participepassé analogique					842
	deuil									1836
	deux									1835, 1836
	deuxièmement									1633, 1635
	devant									1616
	devant que									1426
	devoir				construction					1304
	dexter		LClass							1864
	dez			galicien						1837
	dez			portugais						1837
	di		AF							1865
	diable									1979
	dialectologie									1841
	diaphragme									1980
	diarrhée									1889
	dieci			italien		diece				1837
	dies			franco-provençal						1837
	diēs		LClass							1865
	dieselgate									1992
	dietz			aragonais						1837
	Dieu vous gard									774
	diez			asturien						1837
	diez			espagnol						1837
	digestif									1994
	diligence									1816, 1883
	dimes		AF		P4					752
	dinde									1885
	dîner				construction					1286, 1817, 1890, 1891
	dingo									1991
	dire				conjugaison					749, 760, 1835
	dire		AF, MF		conjugaison parfait					826, 1835
	direct									1982
	directu		latin							1982
	dis-				préfixe privatif					657
	dîs			frioulan						1837
	dìsc			ladin						1837
	disjejunare		latin tardif							1890
	disme				numéral					730
	disner									1817
	disons / dimes									749
	disputer				construction					1016
	disque dur									1949, 1950, 1952, 1955, 1967
	dix									1836
	djembé									1991
	do									1985
	docteure				nom féminin					660-661
	dogana			italien						1983
	doins		AF		P1 de donner	doing				755
	doinse		AF		P3 de donner au subjonctif	doinst	doigne			773
	dolmen									1991
	dolui				P1 parfait de doloir					813
	dominer				construction					1032
	donai			sarde campidanais						1865
	donar			catalan						1865
	donar			occitan						1865
	donc				syntaxe	(a)don	(a)dont	(a)donque	(a)don(c)que(s)	919, 1213, 1637, 1638-1641
	donna			italien						1872
	donner					doner (AF)				1865
	donra				futur syncopé de donner					805
	dont				relatif sans antécédent					733, 737, 1457, 1635
	dormio		latin		conjugaison					748
	dormir									1835, 1836
	dorsum		LClass							1864
	dorveille									1924
	dos									1864
	dos d'une montagne									1888, 1889
	dostar			rhéto-roman						1856
	douane									1982, 1983, 1984
	double				nom masculin					1889
	double denier									1889
	doubter		FPréclass							1980
	doux-amer									1926
	doux-coulant									1926
	doux-fier									1926
	douzaine									730
	draisienne									1883
	droit				adjectif					1864, 1982
	druide									1965
	du				article partitif					669, 1562-1565	des
	du				déterminant	del				982-989, 1562-1565
	du / de la				article partitif					673-674
	du coup									1640, 1641, 2009
	dugong									1991
	dui /deümes				P1 / P4 parfait de devoir					819
	-dun					-don				1925
	d'un côté									1635
	d'une part									1635
	d'une telle façon que									1640
	-dunum		gaulois			-durum				1965
	duo									1984
	durant que									1424
	dût-il				P3 subjonctif imparfait					835
*	dεke		proto-roman							1837
	e									1637
	e-									1992
	-e				marque de conjugaison					750
	-é				désinence P1 du futur	-ai	-ay			801
	-é		MF		désinence P1 du parfait	-				821	-ai / ay / c / g
	-é				suffixe					750
	-é / -ée				désinence participe passé					843	-ié / -iée
	-e de soutien									749
	-e svarabhaktique									807
	-eau									1904, 1912
	écart-type									1925
	ecce ista		latin tardif							693
*	ecce-illum /* ecce-illam / *ecce-illui / *ecce-illaei		latin tardif							693
	échanson									1976
	échapper				construction					1017
	échevin									1976
	échine									1976
	e-citoyen									1992
	éclater				construction					1040
	éclore				construction					1042
	éco-									1910
	eco-friendly									1992
	école									1962, 1993
	écot									1976
	écoute									1637
	écouter									1836
	écran									1933, 1936
	écrevisse									1976
	écrire									1836
	édredon									1991
	effectivement									1644, 1645, 1646
	égal									1878
	également									1635
	égalité									1878
	église									1962, 1993
	eh!									1654
	eissir		AF							1836, 1847
	-eiz > -oiz --> -ez / -iez				désinence P5 analogique					832
	el									669
	el-									1912
	el / al				pronom personnel neutre					682
	el / ele / elle									677, 681, 1102-1112	en + article défini
	eleemosyna		latin chrétien							1976
	élément									1979
	élève									1985
	e-livre									1992
	élixir									1983
	els / eus									687	pronom personnel P6
	e-manif									1992
	embarcadère									1985
	embargo									1985
	embuscade									1984
	émir									1983
	émouvoir				construction					1034
	empêcher				construction					1037
	emperere(s), empereor									628, 629, 637,
	emprêter			oïlique						1836
	emprunt									1839
	emprunter									1836
	en				préposition					867-871, 1737, 1624-1626, 1629-1630
	en		AF		préverbe séparable					1145-1147, 1487
	en				pronom adverbial + préverbe séparable					674
	en-				préverbe					887-890, 1909
	en amont de									1619
	en aval de									1619
	en bas de									1619
	en ce que				temporel					1424
	en ce qui concerne									2011
	en conclusion									1635, 1638
	en d'autres termes									1638
	en dernier lieu									1635
	en effet									1639, 1644, 1645, 1646
	en face de					face (à)				1616
	en fait					de fait				1638, 1645, 1646, 1647, 1823
	en fin de compte									1638
	en haut de									1619
	en outre									1635, 1639
	en plus									1635
	en premier lieu									1635
	en queue de									1617
	en réalité									1630, 1838
	en résumé									1638
	en revanche									1646
	en second lieu									1635
	en som (de)		AF							1620
	en somme									1638
	en travers de									1623
	en un mot									1638
	en vérité									2011
	-enc									1968
	enca		TAF							1976
	encéphalopathie									1901
	enchérir				construction					1018
	enchevaucher		AF, MF							1836, 1847
	encore				concessif					1388
	encore que									1393
	endurer				construction					1023
	énergie éolienne									1981
	enfanter									1980
	enfes / enfant									637
	enfin									1635, 1638
	enfler		AF							1865
	engrosser				construction					1040
	enhadir		TAF							1977
	énième									732
	ennuyer				construction					1033, 1815
	enrichir									1876
	ensuite									1635
	-ent				désinence P6	-ent	-unt			753
	enterroit		AF		P3 conditionnel	entreroit				794
	entier									1982
	entre									1657, 1658
	entre-									1909
	entre –				préfixe					1307
	entredit									1981
	entrer				construction					1014, 1044, 1943, 1944, 1946
	entrerompre									1981
	entrevenir									1981
	entrevue									1981
	enz									1634
	éolienne									1981
	e-passeport									1992
	épée									1882
	éperlan									1968
	Épernay									1965
	épervier									1976
	épieu									1976
	épine-vinette		16e s.							1925
	épistémologie									1962
	epistemology			anglais						1962
	époque									1993
	eps / epsa		TAF							692
	équestre									1982
	-er / -ier		AF		conjugaison					750
	-eraie									1909
	-erie				suffixe					657, 1899, 1909, 1916, 1917, 1918, 1919
	ert		AF		P3 imparfait de estre	iert				782
	es				préposition + article défini					669	en les
	escalade									1984
	escalier									1993
	escarnin		TAF							1977
	escompte									1984
	escorte									1984
	esguarder		TAF							1977
	esguarer		TAF							1977
	esmarrir		TAF							1977
	Espagnole									1963
	espardre		AF, MF							1836, 1847
	espede		TAF			espethe				1976
	espelir		TAF							1977
	espérer									1980
	espion									1984
	esprit									1980
	-esque									1897, 1912, 1920, 1968, 1984
	esse		latin		verbe à l'infinitif					778
	-esse				suffixe	-ece (AF)				504, 519, 624-626, 628 , 1916, 1917, 1919
	esse que									741, 1231
	essuie-glace									1926
	esta		MF		P3 parfait de ester	estut				824
	estafette									1984
	est-allemand									1968
	estampe									1984
	estar sentado			espagnol						1866
	est-ce que				marqueur d'interrogation directe					741, 742-743, 1228-1232, 1356
	esteie		AF		P1 de ester / estre à l'imparfait					780
	ester		AF							1864
	estez									1637
	estont		AF		P6					753
	estrai				futur P1 de estre	serai				800
	estre		AF		conjugaison					749, 760, 776
	estre / être				verbe copule					1156-1157, 1159-1168
	esvoler		AF, MF							1836, 1847
	et				syntaxe					947, 953-957, 1429, 1635, 1636, 1654-1678
	et			turc						1861
	-et					-ete				1899, 1904
	et / ette				suffixe					624, 625
	et / ni				coordonnants					1174, 1205-1211, 1218
	et elle lui				proposition elliptique					1326
	et même					et mesme-s				1639
	étambot									1976
	étoile									1962
	étouffer				construction					1040
	étrangler				construction					1040
	être									1495
	être assis									1866
	être debout									1864
	être, estre				auxiliaire verbes composés					836-838	avoir
	étroit									1982
	-ette									1987
	étymologie									1827
	euh									1637
	-eûmes, -eüstes		MF		P4 / P5 parfait de avoir, accent circonflexe					827
	-eur				suffixe	-our (AF)				624, 627, 1908, 1914, 1916, 1917, 1919
	euro-									1910
	eurosceptique									1905
	-euse				suffixe					624-627
	euskarien, euskarienne									1991
	-eusmes		MF, 16e s.		s désinentiel P4 parfait					823, 827	eûmes
	-eüsse, eüst / oüsse, oüsse		AF, MF		P1 subjonctif imparfait					832
	eüssiens > eussions		12e-14e		P4 subjonctif imparfait de avoir					832
	-eustes		MF, 16e s.		s désinentiel P5 parfait					823, 827	eûtes
	-eux									1899
	-eve		AF, Est		désinence verbale imparfait					782
	évidence	(de - toute)								1730
	exact									1865
	exacto			espagnol						1865
	exceller				construction					1025
	exploser				construction					1041
	explosion									1844
	exprimere		LClass							1866
	extra-									1908, 1909, 1916, 1981
	eye-liner									1988
	ez vos									1046-1047, 1049, 1052, 1430
	fa									1985
	fabrica		latin							1982
	fabrique									1982
	fac									1876
	façade									1984, 1993
	face à									1921, 1922
	facebook									1991
	faciens		AF		P4 de faire au subjonctif	façons				770
	facimus		latin		P4 indicatif présent					748
	façons	(de toutes - )								1731
	faculté									1876
	fado									1990
	faïence									1984
	faillite									1984
	faim									1836
	faimes / faisons		AF		P4 indicatif présent					748, 752
	faire				conjugaison					749, 760, 1835, 1836
	faire		AF, MF		conjugaison au parfait					825-826, 1835, 1836
	faire				construction					1304, 1835, 1836
	faire (se -)				verbe copule					1159-1160
	faire (si / non / le)									1120-1125, 1134
	faire / contrefaire				conjugaison					778
	faire sauter									1994
	fair-play									1987
	fais				P2	faiz				751
	faisons									749, 767
	fait	(du - que / de)								1384
	faites				P5					748
	fan					pluriel fans				1963, 1974
	fantassin									1984
	far									1991
	fard			breton vannetais						1841
	fare									1841
	farsi									1991
	fashion-week									1992
	fasse				P3 de faire au subjonctif					774
	fast-food									1988
	fau			rhéto-roman						1856, 1857
	faute	( - de)								883
	fauteuil									1993
	fauve									1975
	favoriser				construction					1032
	faz		AF		P1 de faire					755
	fel, felon									626-627, 637
	felix		TAF							1976
	felunie		TAF							1977
	femeie			roumain						1872
	fémina			sarde						1864, 1872
	fēmina		LClass							1864
	féminitude									1931, 1932
	femme									1864, 1872
	fendre									1864
	feng shui									1991
	fer		FClass							1882
	-fère									1981
	fermenter				construction					1041
	ferry-boat									1987
	fervestir									1923
	fesisse / fesisse		AF, MF, Nord		P1 subjonctif imparfait de faire					831
	festin									1984
	feu									1856, 1857
	fève									1836
	février									1836
	fiacre									1883
	fief									1976
	figue									1986
	figurine									1984
	fil			norvégien américain						1957
	fil									1836
	Filet			allemand						1995
	filet			anglais		fillet				1995
	filet									1994, 1995
	filete			espagnol (Paraguay, Uruguay)		filet				1995
	filetto			italien						1995
	fille									1835
	fillo		germanique							1979
	film									1987, 1993
	filo			italien		filo				1995
	fils									1835
	filz / fils / fil		AF		nom masculin					644
	finalement									1638
	findere		LClass							1864
	fir de păr			roumain						1870
	First lady									1962
	fisent		AF		P6 parfait de faire					820
	fission			anglais						1962
	fission									1962
	fitness									1987
	fiume			italien						1871
	fjord									1991
	Flamanville									1925, 1927
	flanc									1976
	flaner			normand						1830
	flashant									1956
	flèche									1976
	Fleisch			allemand						1861
	flēre		LClass							1859
	flesh			anglais						1861
	Fleurac									1965
	Fleury									1965
	fleuve									1866, 1870
	flipper				‘billard électrique‘, ‘jeu de flipper‘					1956, 1970, 1971, 1972
	flipper			anglais						1956, 1971, 1972
	florifère									1900, 1901
	flotte									1976
	flottille									1985
	flueve		AF							1866
	flūmen		latin							1870
	fluviu			roumain						1866, 1870
	fluvius		LClass							1866, 1870
	foc			catalan						1856, 1857
	foc			occitan						1856, 1857
	foc			roumain						1856, 1857
	focus		latin tardif							1811, 1856, 1858, 1865, 1890
	fogo			portugais						1856, 1857
	fogu			sarde						1856, 1857
	foie gras									1994
	foin					fein				1836, 1843
	foirole			dialecte du Centre						1830
	fonctionnaire									1994
	fontaine									1836
	food-									1992
	foodivore									1992
	foodocratie									1992
	foodosphère									1992
	foot									1987
	footeux									1956
	footing			anglais						1968
	footing									1963, 1968
	foresta			italien						1871
	forêt									1871
	forge									1982
	fōrmāticum		latin parlé							1859
	-forme					-iforme				1907
	fors				exceptif					1267, 1634
	forsenede		TAF							1977
	fort	(au -)								1730
	fort / forz									636, 654
	fortior		latin		comparatif					641
	fortissimus		latin		superlatif					641
	Foulard			allemand						1995
	foulard			anglais						1995
	foulard			italien						1995
	foulard									1849, 1994, 1995
	fourme									1843, 1844
	fournir									1993
	fragile									1980, 1982
	fragile(m)		latin							1982
	fraindre		TAF, MF							1836, 1847
	frais									1993
	fraise									1986
	frais-salé									1925
	framboise									1814, 1986
	franc									1977, 1993
	français									1968
	France									1993
	fraternisation									1994
	fraterniser									1994
	freak									1988
	free-thinker			anglais						1880
	frelater									1990
	frêle									1982
	French-bashing									1906
	frère									1836
	frere(s)									553, 635,
	fresne(s)									639
	fresque									1984, 1993
	fricāre		LClass							1866
	fricatif									1840
	-friendly									1992
	frigide									1982
	frigidu(m)		latin							1982
	frikativ			allemand						1840
	froid									1876, 1982
	fromage									1859
	frotter					froter (AF)				1866
	frúmene			sarde logoudorien						1871
	fu / fut		AF, MF		P1 Parfait de estre					823, 826	feustes
	fuego			espagnol						1856, 1857
	fuel									1987
	fugue									1984
	fui		AF		P1 Parfait de estre					811, 1637
	fuir									1836
	fular			espagnol		foulard				1995
	fum		AF							1866
	fumée									1866, 1867
	fûmes		18e s.		P4 parfait de estre					823
	fūmus		LClass							1866
	fun									1988
	fuoco			italien						1856, 1857
	fūr		LClass							1806
	fussons, fussiens, fussions		AF, MF		P4 subjonctif imparfait de estre					830
	fûtes		18e s.		P5 parfait de estre					823
	gabbiano			italien						1839
	gadjo									1991
	gag									1987
	gage									1976
	gagne-denier		MF							1924
	gagner									1976
	gaieté									1993
	gain									1976
	galère									661
	galerie									1993
	galet									1965
	galoche									1965
	galoper									1976
	gangster									1987
	gant									1976, 1993
	Garage			allemand						1955
	garagem			portugais						1955
	garant									1976
	garantir									1976
	garçon									1976, 1993
	garde-bras									1920, 1922, 1924
	garde-corps									1924
	garde-côte									1924
	gardelinge									1924
	garde-manger									1922
	garder									1969, 1975, 1993
	garde-robe									1924
	garnir									1969
	gars / garçon									653
	gaspacho									1985
	-gate									1910, 1911, 1992
	gauche									1849, 1864
	Gautier									1976
	gaviota									1839
	gazon									1976
	gecko									1991
	geek									1992
	geisha									1991
	gendarme									1820, 1921
	gêner									1993
	gens									1835
	gent / genz				nom féminin singulier					637
	gentilhomme									1921, 1922
	géométrique									1980
	géothermie									1981
	Gérard									1976
	gerbe									1976
	gésir									1836
	geyser									1991
	gié		AF							679
	giens				négatif					1263, 1835
	giga-									1916
	ginkgo									1991
	giocare			italien						1869
	giorno			italien						1865
	girl									1987
	gitan									1985
	ğize			istriote						1837
	glaise									1965
	glaive		FClass							1882
	glamour									1987
	glaner									1965
	glisser									1993
	gloire					glorie				1837
	glorie		TAF							1977
	gnou									1991
	goéland									1839
	gonfiare			italien						1865
	gonfler									1865
	gorge									1982
	gosí			lorrain						1830
	gospel									1883
	goulache									1991
	gouverneure									661
	goyave									1986
	graim		TAF							1977
	graindre / graignor		AF		adjectif comparatif					645
	grand-									1835, 1922
	grand (épicène) / grande									654, 662
	grandior				adjectif comparatif					637, 645
	grandisme				superlatif					640
	grant				adjectif épicène					644
	granz				adjectif féminin singulier					636
	grapefruit									1988
	grappa									1985
	gras									1836
	grâtan		francique							1979
	gratte-ciel									1877
	gravir				construction					1029
	greffière									661
	grenade									1986
	grenouille									1876
	grêtan		gotique							1979
	grimper				construction					1030
	gris									1975, 1977, 1978, 1993
°	grîs		francique							1977
	gris-bleu									1926
	grognard									1968
	gros									1835, 1836
	groseille									1986
	groteseque									1984
	groupe									1963, 1993
	grue									1818
	guarde		TAF							1977
	guarder		TAF							1977
	guarir		TAF			garir				1977
	gué									1836
	guêpe									1969
	guère									1993
	guereduner		TAF							1977
	guérilla									1985
	guérillero									1985
	guérir									1976
	guerira				futur					806
	guerpir		TAF							1977
	guerre									1976, 1993
	guetter									1976
	Gui									1976
	Guillaume									1969, 1976
	guinder									1976
	guise		TAF							1977
	guitare									1985
	gunfanun		TAF							1977
	gwelan			breton						1839
	ha									1637
	ha !									1323
	habere				avec infinitif					2009
	habere				conjugaison					778
	habere	accompagné d'un participe passé et d'un complément d'object direct (en latin)		latin classique						1494
	habere	dans l'ordre infinitif + habere (en latin)		latin classique						1517, 1518
	habetis		latin							745
	habiter		TAF			abiter				1977
	habler		FPréclass							1885
	hache									1976
	haie									1976
	haïr									556, 754, 766, 795-796, 847, 1976
	hall de gare									1921, 1922
	Hals			allemand						1982
	Hals-Nasen-Ohrenarzt			allemand						1982
	halt		TAF							1977
	hamac									1985
	hanche									1976
	happy hour									1988
	harakiri									1991
	hard disk			anglais						1949, 1952, 1967
	hardi									1976
	haricot									1969
	harissa									1983
	hashtag									1992
	hatjan		francique							1979
	hauberc									1976
	hausser					halcier (AF)				1943, 1944, 1946
	Haut			allemand						1982
	Hautarzt			allemand						1982
	haute couture									1994
	haute cuisine									1994
	hautever									1927
	haut-tonnant									1926
	he					hé				1637
	heaume									1969, 1976
	hein?									1637
	helfen	(jm. -)		allemand						1967
	héliophyte									1901
	helme		TAF							1977
	hender			espagnol						1864
	héraut									1976
	herbe									1836
	herberc		TAF			helberc	herberge			1977
	herbergier		TAF							1977
	Herbert									1976
	héros									1970
	hêtre									1976
	hic		latin							692, 1547, 1569
	hier									1634
	hit-parade				nom masculin/nom fénimin					1962, 1987
	hit-parade			anglais						1962
	ho									1637
	hoc		TAF							1976
	holding				nom masculin/nom fénimin					1963, 1987
	holding company			anglais						1963
	Hollando-compatible									1927
	Holy Cross Church			anglais						1962
	holy cross church									1962
	homard									1976, 1991
	hombre			espagnol						1872
	homicide									1900
	Hommage			allemand	nom fénimin					1955
	homme									1872, 1876, 1882
	homme-grenouille									1876
	homo		latin							1872
	honnir									1976
	honte									1969, 1976
	hooligan									1987
	hôpital									1982
	hors (de)									1619
	hors d'œuvre									1994
	hospes		LClass							1816
	hospitale(m)		latin							1982
	hotdog									1988
	hôte									1813, 1816
	hôtel									1982
	hotline			anglais						1962
	hotline					hot-line	hot line			1962, 1987
	houx									1976
	hovercraft									1987
	Hugo									1976
	Hugues									1976
	hui		AF							1634
	huitante									1965
	humain									1876, 1878
	Hund			allemand						1982
	Hunde-			allemand						1982
	hydrique									1901
	hydroélectricité									1981
	hydrogène									1900
	hydromassage									1923
	hydromasser									1923
	hydrophile									1981
	hydrophobe									1981
	hygiène									1979
	hygromètre									1981
	hymen		FClass							1882
	hyménée		FClass							1882
	hyper-									1907, 1908, 1909, 1981
	hypo-									1907, 1909
	hystérique									1979
	hystérotomie									1901
	i				pronom adverbial					674-678
	i- / y-				préfixe					693
	icel									693, 694	cel
	icest									693, 694	cest
	ici									697
	-ie		AF							1899, 1909
	-ié / -iée			palatal.	désinence participe passé					843	-é / -ée /-ie
	-ie < -iee				désinence participe passé féminin					843
	-iemes		AF	picard	désinence verbale					781
	-ien									1920
	-iens		AF, MF, 16e s.		désinence verbale					803
	-ier									1908, 1912
	-ier / ière				suffixe					9
	-ier > -er		15e s.		désinence Infinitif					851
	ierre		AF							1836, 1847
	iert				P3 imparfait de estre	iere	ere			782-783	ert
	if									1838, 1965
	-if									1914
	-ifier									1904, 1907
	īgnis		LClass							1851, 1852, 1857, 1858, 1865
	il				pronom impersonnel					1102-1112, 1268-1282, 1331-1333, 1589-1591
	il				pronom personnel P3					681-682, 1102-1112, 1589-1591
	il meïsmes		AF		pronom personnel					688, 1003
	ill, ilh			dialectal	pronom personnel P3					681
	ille		latin							630, 686, 692 , 1484, 1547, 1548, 1569
	ille / illa / illu / illi / illae / illos / illas		latin							666, 687
°	illui, illi		latin							630, 666, 693
	ilz / ils				pronom personnel 6					681-682, 1102-1112
	imagene		TAF							1977
	imparfait									1845
	impedance			anglais						1962
	impédance									1962
	impossibilité									1879
	impossible									1876, 1878, 1879
	impression laser									1925
	in									1993
	in-				préfixe privatif					657, 1907, 1909
	inacceptable									1878
	indigène									1981
	indigner				construction					1348
	indigo									1985
	infanterie									1984
	infection									1980
	inflammation									1980
	inflāre		LClass							1865
	influer				construction					1017
	informer				construction					1347
	infra-									1909
	-ing									1968, 1969
	ingénieure									660-661
	Ingliche									1961
	ingratitude									1931
	inhumain									1876, 1878
	injure									1980
	innocent									1979
	inodiare		latin tardif							1815
	înota	(a -)		roumain						1866
	inspirer				construction					1036
	instagram									1991
	installer									1993
	instant plaisir									1925
	insulino-résistance									1905
	insulter				construction					1033
	integer		latin							1982
	intègre									1982
	Intelligenzquotient			allemand						1954, 1955
	inter-									1907, 1909
	interdit									1981
	Internet			anglais		internet				1874, 1877, 1949, 1950, 1987
	internet									1874, 1877, 1949, 1950, 1952, 1961, 1973, 1987
	interrompre									1981
	intervenir									1981
	interview									1981, 1987
	invectiver				construction					1029
	io, jo (pronom personnel P1)		TAF							679
	-ion									1897, 1914
	ion (suffixe)									627, 630,
	-ions				désinence verbale	iens				787, 803, 834	voir -iens
	ior (suffixe)		latin							640
	ipse		TAF							1976
	-ique									1899
	ironing			anglais						1969
	irrite-mer			Ronsard						1924
	is		latin							692
	isarien									1982
	ischimus			sarde	‘nous savons‘					1858
	ischire			sarde		sciri				1857
	-ise									1916, 1917, 1919
	-isk		germanique							1968
	-isme									1899
	isme (suffixe)									622
	-issime									1984
	issimus (superlatif)		latin							641
	-issions / -assions		16e s.		P5 désinence plus-que-parfait					833
	issir		AF			eissir				1939, 1943, 1944
	iste		latin							692, 1547, 1569
	-iste									1899, 1908
	-ite									1899, 1903, 1981
	-ité					-(e)té (en AF)				1899, 1916, 1917, 1918
	ité (suffixe)									623
	item		AF, MF							1635
	iter (suffixe)		latin							641
	it's not my cup of tea			anglais						1967
	-itude									1902, 1903, 1916, 1919, 1931, 1936
	iūstus		LClass							1865
	jà				concessif					1388
	ja (adverbe)									1213, 1265
	ja soit (ce) que									1393
	jachère									1965
	jacquard									1994
	jacqueter					jaqueter				1885
	jadis									1634
	jamais									1265, 2008, 1688-1690
	jambe									1835, 1992
	jante									1965
	japonais									1993
	jardin									1838, 1976, 1993
	jarret									1965
	jaune									1977
	jaune-citron					jaune citron				1920, 1921, 1926
	jazz									1987
	je									1835
	je / j' / ge / g'				pronom personnel P1					676-679, 1102-1112
	je comprends									1637
	je crois / pense / sais									1138
	je-ne-sais-quoi									1921, 1922
	jes									680, 685	je les
	jeter									1876
	jeunes									1884
	jo		9e-12e s.		pronom personnel P1					678
	joer		AF							1867
	jol				P1 + P3					685
	joli									1993
	jonquille									1985
	jorn		AF							1865
	jou / gié									676	je
	jouer				jouer à / jouer de					1867, 1869
	jour									1865
	jour ouvrable									1881, 1889
	juca	(a se -)		roumain						1869
	judo									1991
	jugar			espagnol						1869
[truncated: 1,610 more rows]
