# Supplementary material
Source: publisher site journal article supplement (https://www.degruyterbrill.com/publication/isbn/9783110348194/downloadAsset/9783110348194_Index%20lexical.zip)
Supplement: Supplementary file 3 [file index lexical Partie 3 GGHF.xlsx]

## Sheet: fichier mère (par étymologies)
grec	grec attr.	.	étymon 1 tonique soulignée	étymon 1 astérisque	étymon 1 tonique accent aigu	étymon 1 attr.	.	étymon 2 tonique soulignée	étymon 2 astérisque	étymon 2 tonique accent aigu	étymon 2 attr.	.	étymon 3 tonique soulignée	étymon 3 astérisque	étymon 3 tonique accent aigu	étymon 3 attr.	.	renvois	type chgt	AF1	AF1 attr.	.	AF2	AF2 attr.	.	AF3	AF3 attr.	.	AF4	AF4 attr.	.	AF5	.	AF6	.	AF7	.	AF8	.	AF9	MF 1	MF1 attr.	.	MF 2	MF2 attr.	.	MF3	Sé (AF ou MF)	germ. mod.
			(Ceno)mannicum		(Ceno)mánnicum		>											272.6	phonét.	Maine
			(dies) dominica		(dies) domínica		>											271.5	variation	dimagne
			°(ec)ce + °(il)lūi	°	(éc)ce + (il)lū́i		>											222.2	phonét.	celui
			(ec)ce + ille		(ec)ce + ille		>											157.2	perte de la syllabe initiale	cil
			(ec)ce + istu		(ec)ce + istu		>											157.2	perte de la syllabe initiale	cist
			°(es)sere-at	°	(es)sere-át		>											157.2	perte de la syllabe initiale	sera
			(il)la		(il)la		>											157.2	perte de la syllabe initiale	la
			(il)la hōra		(il)la hōra		>											219.4	phonét.	lores		,	lors		,	alors	a + lors
			(il)lu		(il)lu		>											157.2	perte de la syllabe initiale	le
			°(il)lūi	°	(il)lū́i	dat. illi croisé avec cūī datif de quī	>											222.2	phonét.	lui
			(in)de-ūsque		(in)de-ū́sque		>											281, 287	évolution retardée (diverses raisons)	jusque		,	enjusque
			(nux) gallica		(nux) gállica		>											271.5	variation	gaille		,	jaille																									‘noix’
			ab		áb		>											206.4	phonét.	a
			-ābas		-ā́bas	2s imp	>											206.3	-ais analogique	-eves		,	-oes		,	-oues
			abbāte		abbā́te		>											206	phonét.	abe
			abbreviāre		abbreviā́re		>											182, 285, 350.4	phonét.	abregier
			abellāna		abellā́na		>											182.2, 260.3	phonét.	avelaine
			abiēte		abiḗte		>											276.1	perte irrégulière et ancienne de yod (ou i)	avoi																												‘sapin’
			°aboculo	°	abóculo		>											346.2	savant	avogle
			abortāre		abortā́re		>											188	phonét.	avoulter		,	avorter
			abrotonu		abrótonu		>											337.3a, 343	variation	aurone		,	averoine	TL1-681 : 45 sq., REW 39
			absolvere		absólvere		>											292	phonét.	assoldre
			°accaptāre	°	accaptā́re		>											173	phonét.	achater
			accognitu		accógnitu		>											134	phonét.	acointe
			°accommūnicāre	°	accommūnicā́re		>											190.1	phonét.	acomungier	Alex 52																											‘communier’
			acerabulu		acerábulu		>											112	phonét.	airable
			aciariu		aciáriu		>											100.1, 283, 350	phonét.	acier
			acidula		acídula		>	°acigla	°	acígla		>						292.11, 299, 339, 345	phonét.	oseille
			acinu		ácinu		>											67, 112, 259, 291, 300	phonét.	aisne
			ācre		ā́cre		>	°ācru	°	ā́cru		>						174.3, 179.3, 346.2	egre, aigre savants	aire		,	egre		,	aigre																						‘amer’
			āctus		ā́ctus		>											33
			°acūcula	°	acū́cula		>											192	phonét.	aguille
			ad		ad		>											13, 206.4, 306, 308, 308.1, 327, 354, 356	phonét.	aθ		,	ad		,	at		,	a
			°adaciāre	°	adaciā́re		>											173	phonét.	aacier																												‘agacer’
			adaequāre		adaequā́re		>											324	phonét.	aiver																												‘associer’
			adauctāre		adauctā́re		>											165	phonét.	aoitier																												‘augmenter’
			°adaugere	°	adáúgere		>											117.6	phonét.	aoire																												‘multiplier’
			adcrēscere		adcrḗscere		>											349	phonét.	acreistre
			adjūtāre		adjūtā́re		>											174, 350.4	phonét.	aidier
			°admemorāre	°	admemorā́re		>											64.1, 158	phonét.	amembrer																												‘se souvenir’
			admīrārī		admīrā́rī		>											299	phonét.	amirer
			°adoculāre	°	adoculā́re		>											235.4	phonét.	aouiller
			adportāre		adportā́re		>											296	phonét.	aporter	StLég 200
			°adprenditīciu	°	adprenditī́ciu		>											158	phonét.	aprentiz
			adpressu		adpréssu		>											176	phonét.	apres
			°adprīvātiāre	°	adprīvātiā́re		>											174.1	croisement avec vitiāre	apreveisier		,	aprevoisier
			adpropiat		adprópiat	3s, attesté Vulgate (Versio Itala, 4e siècle)	>											170, 187.1	phonét.	aprueche		,	approche
			°adratiōnāre	°	adratiōnā́re		>											174, 174.1	phonét.	araisnier
			adrestāre		adrestā́re		>											344	phonét.	arrester
			adretro		adrétro		>											85, 350	phonét.	ariere		,	arriere
			°adsatiōnāre	°	adsatiōnā́re		>											174.1	phonét.	assaisnier
			°adsatis	°	adsatis		>											299	phonét.	assez
			adulterāre		adulterā́re		>											190	phonét.	avoutrer																												‘commettre un adultère’
			adulteru		adúlteru		>											371		avoltre		,	avoutre		,	adultere
			advenīre		advenī́re		>											289, 299, 295, 306	advenir savant	avenir
			advocāre		advocā́re		>											299	phonét.	avoer
			advocō		advócō	1s	>											322	phonét.	aveu
			aedificāre		aedificā́re		>											319.3	phonét.	aigier
			Aegidius		Aegídius		>											288	emprunt au latin	Gilies		,	Gires		,	Giles
			aequāle		aequā́le		>											241.2, 324	dissimilation	ivel																												‘égal’
			aequāre		aequā́re		>											324	phonét.	iver																												‘rendre égal’
			aerāmen		aerā́men		>											241.1	variation	araim
			aestimāre		aestimā́re		>											29.1, 30, 67, 242, 291	phonét.	esmer
			°aetāticu	°	aetā́ticu		>											261, 381	phonét.	eage																					âge
			°afannāre	°	afannā́re		>											319.3	phonét.	ahaner
			affectiōne		affectiṓne		>											288	emprunt au latin	afection
			°affībulāre	°	affībulā́re		>											248.1	analogique	afubler
			afflīgere		afflī́gere		>											191.3	phonét.	aflire
			agnellu		agnéllu		>											125, 131, 136, 149, 173, 291, 291.2, 300, 300.1	phonét.	agnel
			agru		ágru		>											300, 346	phonét.	aire																												‘nid (d'aigle)’
			-āi		-ā́i	1s pf, cf. °cantāi	>											206.1	phonét.	-ei	cf. chantei	,	-e	cf. chante
			āla		ā́la		>											206	phonét.	ele
			alabastru		alabástru		>											260.1	phonét.	alebastre		>	aubastre
			alacre		álacre		>	alacre		alácre		>						179.3, 85.2	savant	alegre		,	halegre
			alacre		álacre		>	°alecre	°	alécre		>						179.3, 85.2, 237	savant	aliegre		,	haliegre		,	aligre
			Alamannia		Alamánnia		,	Alamannica		Alamánnica		>						235, 236, 271.5	variation	Allemagne
			alapa		álapa		>											269	phonét.	aube		,	auve
			alauda		aláúda		>											181.1	aloe																													‘alouette’
			alauda + -ellu		aláúda + -éllu	acc sg	,	alauda + -ellos		aláúda + -éllos	acc pl	>						181.1	variation	aloel	‘alouette’	,	aloyaulx	pl
			alausa		aláúsa		>											223	phonét.	alose
			alba		álba		>											14, 175, 295, 298.3, 302, 307, 333, 365	phonét.	albe		>	aube
			albūmen		albū́men		>											222.5	phonét.	aubun																												‘blanc d’œuf’
			-āle		-ā́le		,	-āre		-ā́re		>						206.8	phonét.	-el		,	-er
			alebris		álebris		>											335.1a
			Alesia		Alésia		>											179	phonét.	Alise
			°alibānu	°	alibā́nu		>											267, 269	phonét.	aubain
			alibru		álibru		,	alabru		álabru		>						237	variation																													‘dévidoir’
			°alisnō	°	alisnō	g	>											291	phonét.	alesne
			ālium		ā́lium		>	alliu		álliu								175.4, 255, 283	phonét.	ail		,	aux	pl	,	aulx	pl
			allactāre		allactā́re		>											174.1, 207	phonét.	alaitier
			alleviāre		alleviā́re		>											285	phonét.	alegier
			°alliam	°	álliam	1s subj	>											287	évolution retardée (diverses raisons)	alge		,	auge
			alnu		álnu		>											175, 244, 259, 291, 370, 372.1	phonét.	alne		,	aune
			°alōd	°	alōd	frk	>											311	phonét.	aluet		,	alué		,	aluef
			altāre		altā́re		>											206.8	phonét.	alter
			alteru		álteru		>											67, 227.1, 250, 334, 348, 365	phonét.	altre		>	autre
			°alterūi	°	alterū́i	alterī datif de alter croisé avec cūī datif de quī	>											222.2, 234	phonét.	autrui
			°altiāre	°	altiā́re		>											67, 139, 139.2, 284	phonét.	haucier
			altu		áltu		X	°hauh	°	hauh	frk	=	vha hōh		vha hōh		>	264.3	croisement																														hoch
			alūmen		alū́men		>											222.5	phonét.	alun
			alveu		álveu		>											67, 278.1, 285	phonét.	auge
			amant		ámant	3p	>											264.4	phonét.	aiment
			amante		amánte		>											175, 235	phonét.	amant
			amāre		amā́re		>											10, 13, 309, 325	phonét.	amer
			amāritate		amāritáte		>											206.7	phonét., amerte dérivation AF	amarte		,	amerte	amer+te
			amāritūdine		amāritū́dine		>											84.1	phonét.	amertume
			amāru		amā́ru		>											206, 206.7	phonét.	amer
			amat		ámat	3s	>											208	phonét.	aime
			amāte		amā́te	2p impér.	>											206.1	-ez analogique	aimez
			amātis		amā́tis	2p	>											291.5, 299.4	phonét.	amez
			amātōre		amātṓre		>											219.5	phonét.	ameor		,	ameeur		,	ameur																						‘amant’
			amāvi		amā́vi	1s pf	>											209.5	phonét.	aimai
			Ambrosiu		Ambrósiu		>											284	phonét.	Ambrois
			ambulāre		ambulā́re		>											334, 348	phonét.	ambler
			-āmente		-āménte		>											236.1	phonét.	-ement	[-əmã]
			amīca		amī́ca		>											191, 204.1, 323, 389	phonét.	amie																					amie		,	ami
			°āmiciōne	°	āmiciṓne		>											182.2	phonét.	ameçon
			amīcitia		amīcítia	lc	>	°amīcitāte	°	amīcitā́te		>						112, 191, 206.7, 207	i probablement analogique	amistie
			amīcu		amī́cu		>											221	phonét.	ami
			amita		ámita		>											175	phonét.	ante
			°amitāne	°	amitā́ne	amita + āne	>											208.1	phonét.	antain	CRs																											‘tante’
			amōre		amṓre		>											219.5, 370, 371	dialectal	amor		,	amour		,	amur	Rol, Serm
			ampla		ámpla		>											335.4
			amplu		ámplu		>											348	phonét.	ample
			-āmus		-ā́mus	1p	>											206.2	dialectal ?	-ons
			anate		ánate	lc	,	anite		ánite		>						208.2, 237.5, 267.2	ane obscur	ane		,	aine																									‘canard’
			°anaticula	°	anatícula	lc	>	°anatīcula	°	anatī́cula		>						261	phonét.	aneille
			ancilla		ancílla		>											97, 139, 139.2	phonét.	ancele																												‘servante’
			ancora		áncora		>											67, 101, 244, 301, 334, 349	phonét.	ancre
			Andecāvis		Andecā́vis		>											271.4	phonét.	Angiers
			Andecāvu		Andecā́vu		>											209, 271.4	phonét.	Anjou
			angelu		ángelu		>											267.2, 371, 371.1	savant	angele	Psautier d'Oxford	,	ange		,	angle		,	angre																				angel
			angulu		ángulu		>											349	phonét.	angle
			angustia		angústia		>											12, 30, 67.7, 140, 144, 149, 264, 284, 333	phonét.	angoisse
			anima		ánima		>											68.3, 291, 291.3, 371, 371.1, 388	substitution de sonante	arme		,	alme		,	ame		,	anemes	Psautier d'Oxford	,	aneme	,	anme							âme
			animālia		animā́lia		>											68.3	substitution de sonante	armaille		,	almaille
			anite		ánite		,	anate		ánate		>						237	variation																													‘canard’
			°ankja	°	ankja	frk	>											286	phonét.	anche
			annu		ánnu		>											291.4, 291.5, 356, 373, 374	phonét.	an	CRs	,	anz	CRp
			annuāle		annuā́le		>	°anuāle	°	anuā́le		>						59, 66, 289.7	emprunt au latin	anvel																												‘annuel’
			-ant		-ant	3p	>											236.3	nasale sans réalité phonétique	-ent
			antecessor		antecéssor	nom sg	>											251, 292, 329	phonét.	ancestre	CSs
			antecessōre		antecessṓre		>											158	phonét.	ancessor	CRs
			antiphona		antíphona		>	°antephona	°	antéphona		>						244, 298, 298.1	phonét.	antievre		,	antiene		,	antienne
			antiphona		antíphona		>											298.1	phonét.	antoine
			antīqua		antī́qua		>											324	phonét.	antive																												‘ancien’
			°antius	°	ántius		>											175.2	obscur	ainz																												‘auparavant’
			-ānu		-ā́nu		,	-āna		-ā́na		>						208.1	phonét.	-ε͂		,	-εn(ə)
			anxia		ánxia		>											136, 175, 284	phonét.	ainse		,	ainsse																									‘anxiété, inquiétude’
			anxiōsu		anxiṓsu		>											136, 175	phonét.	ainsos
			ape		ápe		>											13, 206, 308	phonét.	ef		,	e																									‘abeille’
			apiariu		apiáriu		>											285	phonét.	achier																												‘rucher’
			apiu		ápiu		>											298, 370	phonét.	ache
			apostolicu		apostólicu		>											272.6	phonét.	apostolie		>	apostoile
			apostolu		apóstolu		>											68, 371	savant	apostre		,	apostle
			°appariculāre	°	appariculā́re		>											158.1	phonét.	apereillier		,	apareillier																									‘préparer’
			appellāre		appellā́re		>											182.2	phonét.	appeler
			applicāre		applicā́re		>											271.1	savant	aploiier
			°appodiāre	°	appodiā́re		>											148, 189	phonét.	apoiier		,	apoier
			apud		apud		>											327	phonét.	od		,	o																									‘avec’
			apud		ápud		>											206.4	phonét.	a
			apud hoc		apud hóc		>											310, 327, 380	phonét.	avuec																					avec
			aqua		áqua		>											181.3, 206.9, 289, 300, 300.7, 300.8, 324, 324.3, 324 réf. bibl.2	variation	aigue		,	aive		,	eve		,	ewe		,	eaue	,	eau
			aquariu		aquáriu		>											300, 324	phonét.	evier
			aquila		áquila		>											174.3, 324.4	aigle savant	aille		,	aigle
			°aquilentu	°	aquiléntu		>											174.3	savant	aiglent		,	aiglentier		,	eglenter	Rol 114
			arātru		arā́tru		>											344	phonét.	arere
			arbitriu		arbítriu		>											67.6, 139, 183, 264.5, 284, 344	phonét.	arveire		>	arvoire																									‘illusion’
			arbore		árbore		>											67, 173, 334, 348	phonét.	arbre
			arboriscellu		arboriscéllu		>											158.5, 183	phonét.	arbreisel		,	arbroisel
			arca		árca		>											105	phonét.	arche
			°arciōne	°	arciṓne		>											29.1, 278, 283	phonét.	arçon
			arcu		árcu		>											256, 313.2, 381	variation	arc																					arc
			arcuballista		arcuballísta		>											158, 269	phonét.	arbaleste
			ardōre		ardṓre		>											12, 264, 333	phonét.	ardeur
			Arduenna		Arduénna		>											289.7	phonét.	Ardennes
			-āre		-ā́re	inf, cf. cantāre	>											206.1, 380	phonét.	-er	cf. chanter																				-er	inf
			ārea		ā́rea		>											66, 121, 174.2	phonét.	aire
			arēna		arḗna		>											215	phonét.	areine
			Argentomagu		Argentómagu		>											246.5	phonét.	Argenton		,	Argentan
			argentu		argéntu		>											16, 97, 100, 104, 107, 173, 281	phonét.	argent
			argilla		argílla		>											97	phonét.	argile
			ariete		aríete		>											276.1	perte irrégulière et ancienne de yod (ou i)	aroi																												‘bélier’
			-āriu		-ā́riu		,	-āria		-ā́ria		>						174.2	obscur	-ier		,	-iere
			arma		árma		>											12, 291	phonét.	arme
			armāriu		armā́riu		>											215.1	armoire non phonétique	armaire		,	armoire
			armātūra		armātū́ra		>											222.4, 236, 261	phonét.	armeure
			arte‑ma(thema)tica		arte‑má(thema)tica		>											288	emprunt au latin									,	artimaire																			‘magie’
ἀρτεμισία		>	artemīsia		artemī́sia	lc	>	°artemisia	°	artemísia		>						67, 221.5, 284	phonét.	armoise		,	ermoise
			-ārunt		-ā́runt	cf. °cantārunt	>											206.1	phonét.	-erent	cf. chanterent
			ascia		áscia		>											140, 283	phonét.	aisse
			asinu		ásinu		>											175, 252.1, 259, 291, 295, 303.2, 303.3, 307	phonét.	asne		>	ane		=	arne	pic	=	adne	anglo-norm
			asperu		ásperu		>											250, 348	phonét.	aspre
			°assopīre	°	assopī́re		>											319	variation	assovir
			asthma		ásthma		>											67	phonét.	asme
ὄστρακον		>	astracu		ástracu		>											246.5	phonét.	astre		,	atre
			°atavia	°	atávia		>											148, 285.2	chute précoce de la labiale	taie																												‘grand-mère’
			°ataviōne	°	ataviṓne		>											285.2	chute précoce de la labiale	taion																												‘grand-père’
			-ātis		-ā́tis	cf. cantātis	>											206.1	phonét.	-ez	cf. chantez
			ātriu		ā́triu		>											67.6, 284	phonét.	aitre
			-ātu		-ā́tu	part., cf. cantātu	>											206.1	phonét.	-e	cf. chante
			auctāre		auctā́re		>											193	phonét.	oitier																												‘accroître’
			auctorāre		auctorā́re	lc	>	°auctōridiāre	°	auctōridiā́re		>						193, 271.1	phonét.	otroiier
			audientia		audiéntia		>											288	emprunt au latin	audience
			audirat		audirát	3s fut	>											344	phonét.	orra
			audīre		audī́re		>											247, 320	phonét.	audir		,	oir		,	ouir
			audis		áúdis	2s	>											291.5	phonét.	oz
			auguriu		augúriu		>	aguriu		agúriu	attesté en bas latin (TLFi)	>	°agūru	°	agū́ru		>	158.3, 222.3, 235.1, 240, 246.1, 276.1, 384.iii	dissimilation	eur	[əyr]																				heur
			Augusta		Augústa		>	°agusta	°	agústa		>						235.1	dissimilation	Aoste
			augustu		augústu	lc	>	°agustu	°	agústu		>						193.1, 235.1, 235.4, 322	dissimilation	aost		,	aoust
			°aurāticu	°	aurā́ticu		>											246	phonét.	orage
			auricula		aurícula		>											244, 246, 346.1	phonét.	oreille
			auru		áúru		>											223, 359	phonét.	or
			ausāre		ausā́re		>											246, 246.2, 359	phonét.	oser
			auscultāre		auscultā́re		>	ascoltāre		ascoltā́re		,	°escultāre	°	escultā́re		>	190, 193.1, 235.1	dissimilation, formes en es- par substitution de préfixe	ascouter		,	escolter		,	escouter
			°austrūcia	°	austrū́cia		>											193	phonét.	ostruce
			aut		aut		>											327	phonét.	o		,	ou
			avēna		avḗna		>											215.1	avoine non phonétique	aveine		,	avoine
			Aveniōne		Aveniṓne		>											248.2, 260.3	phonét.	Avignon
			avica		ávica	lc	>	auca		áúca		>						165.2, 223, 223.1	phonét.	oe		,	oue
			avicellu		avicéllu	lc	>	aucellu		aucéllu		>						97, 99, 165.2, 193, 223.1, 315, 321, 351.1	phonét.	oisel
			-āvit		-ā́vit	3s pf	>											206.6	-a analogique	-aut		,	-ait		,	-at
			avunculu		avúnculu		>											319, 349	phonét.	oncle
			avus		ávus		>	°aviolu	°	avíolu		>						148, 216.4, 285, 285.2, 365	chute précoce de la labiale	aiuel		,	aoel		,	aioel
			axe		áxe		>											256	phonét.	ais
			axīle		axī́le		>											191.1	phonét.	aissil																												‘bout de planche mince’
			axīles		axī́les	pl	>											191.1	essieu emprunt au picard	axis	Renart	>																			aisils		,	aisis
			bāca		bā́ca		>											148, 323, 323.3	phonét.	baie
			°baccīnu	°	baccī́nu		>											97, 139	phonét.	bacin
			Bagdad		Bágdad		>											165.2, 295, 300	phonét.	Baudas
			bajulāre		bajulā́re		>											119	phonét.	baillier
			bālāre		bālā́re		>											235.3	variation	baler		,	beler
			baleāricu		baleā́ricu		>											272, 272.1	phonét.	baillarge																												‘orage de printemps’
			ballāre		ballā́re		>											173	phonét.	baller
			balneāre		balneā́re		>											350	phonét.	baignier		>	baigner
			balneum		bálneum		>	°baneu	°	báneu								134, 137, 368, 373	phonét.	bain		,	bainz	pl
			balsama		bálsama		>											371		balseme		,	balsemu	Roman d'Alexandre
			baptisma		baptísma		>											291	phonét.	batesme
βαπτισμόϛ		>	baptismus		baptísmus		,	baptismum		baptísmum								259.6	phonét.
			barba		bárba		>											302, 333	phonét.	barbe
			Barbara		Bárbara		>											237.4	maintien de la posttonique	Barbe
			°baro	°	baro	g	>	°barōne	°	barṓne		>						220.1	phonét.	baron
			bāsiāre		bāsiā́re		>											115.1, 139, 139.3, 141.2, 144.2, 149, 174, 207, 277, 284, 303, 313	phonét.	baisier
			basilica		basílica		>											271.5	variation	Bazeille
			°bassiāre	°	bassiā́re		>											23, 115.1, 140, 144, 144.2, 207, 284, 284.5, 303	phonét.	baissier
			batāculāre		batāculā́re		>	batāclāre		batāclā́re	attesté TLFi	>						173, 235.4	phonét.	baaillier
			°batāre	°	batā́re		>											128, 235.4, 240.1	beer analogique	baer		,	bayer		,	beer
			battuālia		battuā́lia		>											67.3, 289.7	processus lt	bataille
			°bawa	°	bawa	celt	>											223.4	gémination de w	boe		,	boue
			Baxera		Báxera	nom propre	>	°Bajsera	°	Bájsera		>						300.5	phonét.	Baisdra	en 588
			beccu		béccu		>											313.2	phonét.	bec
			°bedu	°	bédu	celt	>											311	phonét.	bied		,	biez		,	bies
			Belena		Bélena		>											181	variation
			bella		bélla		>											345.5	phonét.	bele
			bellu		béllu	acc sg	,	bellōs		béllōs	acc pl	>						127, 181, 307.3	variation	bel		,	beaux	pl	,	biaux	pl		biaus	pl
			bene		béne		>											12, 211, 264, 285.1, 379, 401	phonét.	bien																					bien
			benedīcere		benedī́cere		>	°benedicere	°	benedícere								30.2, 112.2	savant	beneistre																												‘bénir’
			benedīcere		benedī́cere		>											270.5	phonét.	beneir
			beneficiu		benefíciu		>											319.2	demi-savant	benevis																												‘bienfait’
			°bera	°	béra	g	>											210	phonét.	biere
			°berbēcīle	°	berbēcī́le	REW 9268	>											273, 273.2, 273.3	phonét.	berzil		,	bercil																									‘bercail’, cf. Bercy
			Bernhard		Bernhard	frk	>											264.4	phonét.	Bernard
			°bertiu	°	bértiu	celt ?	>											177	phonét.	biers		,	bers
			°beslīquāre	°	beslī́quā́re		>											324	phonét.	besliver																												‘courir de biais’
			besta		bésta		>											303	phonét.	beste																													beast
			bestia		béstia		>											140, 179	phonét.	bisse
			bibente		bibénte	part	>											248.1	influence labiale ou analogique	bevant		>	buvant
			bibere		bíbere		>											334, 339, 340, 350	phonét.	boivre		,	bwere
			bibitu		bíbitu	lc, cf. bibere	,	fors + °bibūtu		fors + °bibū́tu		>						222.1	phonét.	fourbeu	cf. forboire ‘boire avec excès’
			bibō		bíbō	1s	>											254, 306, 311, 375	phonét.	beif		,	boif
			°bibūtu	°	bibū́tu	part	>											222.1, 248.1	phonét.	beu		,	bu
			bilanx		bílanx	lc	>	°bilancia	°	biláncia		>						241.1	variation	balance
			°birota	°	biróta		>	°beroue + -ette	°	beroue + -ette		>						260.1	phonét.	beroete		>	brouete
			bisaccia		bisáccia		>											283	phonét.	besace
			Biturigas		Bitúrigas	celt	>											271	phonét.
			°blād	°	blād	frk	>	°im‑blādāre	°	im‑blādā́re		>						320, 348	phonét.	emblaer
			°blād	°	blād	frk	>											206	phonét.	blet		,	ble
			blaesu		bláésu		>											213.5	ae > e cas minoritaire	blois																												‘bègue’
			blao		blao	g	>	blāvu		blā́vu		>						209.4	bleu obscur	blo		,	blou
			°blastēmāre	°	blastēmā́re		>											67, 242, 303, 333, 334, 348	phonét.	blasmer
			°blastemiāre	°	blastemiā́re		>											285	phonét.	blastengier																												‘blâmer’
			°blauƀ	°	blauƀ	g	>	°exblaudīre	°	exblaudī́re		>						246.3, 247	phonét.	esbloir		,	esblouir		,	esbloer		,	esblouer
			Blavia		Blávia		>											285.2	chute précoce de la labiale	Blaye	Gironde
			°blettjan	°	blettjan	frk	>	°blettiāre	°	blettiā́re		>						119.2, 284	phonét.	blecier
			°bodina	°	bódina	celt	>											299, 303.3, 381	emprunt au pic	bosne		=	borne	pic																	borne
			Bonifatiu		Bonifátiu		>											283.6	savant	Boniface
			bonitāte		bonitā́te		>											206.7	phonét.	bonte
			bonu		bónu		,	bona		bóna		>						217, 301.1, 367, 368	phonét., analogique	buona	Eul 1	,	buen		,	buene		,	bun		,	bon	,	bonne							bon		,	bun		,	bonne
			°borniu	°	bórniu		>											283, 381	phonét.	borgne																					borgne
			°bosk-	°	bosk-	g	>	°boscu	°	bóscu		>						264.7	phonét.	bois
			bostia		bóstia	celt	>											284	phonét.	boisse
			botellu		botéllu	acc sg	,	botellōs		botéllōs	acc pl	>						181.1, 243.2	variation	boel		,	boiel		,	bouiaus	pl	,	boyaux	pl
			botulu		bótulu		>	°bocla	°	bócla		>						345	phonét.	bueille		,	buille																									‘entrailles’
			bovāriu		bovā́riu		>											319	variation	bovier
			bove		bóve		>											13, 35, 216, 308, 365	phonét.	buef		,	buof
			brachiu		bráchiu		>											283, 333, 334, 348	phonét.	braz		,	bras
			braciāre		braciā́re		>											283	phonét.	bracier
			°bragu	°	brágu	celt	>											318.2	phonét.	brai		,	brau																									‘boue, fange’
			°breka	°	breka	frk	>											105, 105.5, 296.3	phonét.	breche
			°brekan	°	brekan	frk	>											105.2	phonét.	broiier
			brevi		brévi		>											350	phonét.	brief			bref
			Brivoduru		Brivóduru		>											344.4	variation	Briare	Loiret	,	Briarres	Essonne
			°brodiculāre	°	brodiculā́re		>											243.2	variation	broeillier		,	brooillier
			brogilos		brogilos	celt	>	brogilu		brógilu		>						187, 334, 346	variation	brueil	entrée TL	,	bruil	entrée TL	,	broil	entrée TL
			°brunnja	°	brunnja	frk	>											283	phonét.	broigne
			°brūnu	°	brū́nu	g	>											222	phonét.	brun
			°brustulāre	°	brustulā́re		>											303.2	phonét.	brudler	anglo-norm
			bubalu		búbalu		>											342.1	réaction contre vl	bufle		,	bouffle
			bucca		búcca		>											188	phonét.	boche		,	bouche
			°bucco	°	bucco	celt	>											105.3	phonét.	boc		,	boquet		,	bochier	dér., ‘petit bouc’	,	bochet	dér., ‘boucher’
			buccula		búccula		>											349	phonét.	boucle
			bucculāre		bucculā́re		>											206.8	substitution de suffixe : ‑ier	bucler
			būgula		bū́gula		>											346.2	savant	bugle	plante
			°būkōn	°	būkōn	frk	>	°būcāre	°	būcā́re		>						322.4	phonét.	buer
			bulgaru		búlgaru		>											334, 349	phonét.	bougre
			bulla		búlla		>											296.5	phonét.	bole
			°bultjo	°	bultjo	frk	>	°boltjōne	°	boltjṓne		>						286	phonét.
			burdōne		burdṓne		>											73, 188	phonét.	bordon		,	bourdon
			burgēnse		burgḗnse		>											214.1	substitution de suffixe	bourgeois
			Burgundia		Burgúndia		>											281	phonét.
			burriōne		burriṓne		>											139, 150, 278.2, 284, 284.5	phonét.	borjon
			°būtyrāre	°	būtyrā́re		>											344	phonét.	burrer
			būtyru		bū́tyru		>											334, 363.2	phonét.	bure
			caballāriu		caballā́riu		>											174.2	obscur	chevalier
			caballicāre		caballicā́re		>											175	phonét.	chevaucher
			caballicet		cabállicet	3s subj	>											67.7	phonét.	chevauzt
			caballōs		cabállōs	acc. pl	>											307, 310.1	phonét.	chevals		>	chevaus
			caballu		cabállu		>											105.1, 173, 232, 238, 239, 244, 255, 291.4, 307, 310.1, 331, 384.iv	phonét.	cheval		=	keval	pic																	cheval
			cacat		cácat	3s	>											207.1a	phonét.	chie
			cadentia		cadéntia		>											180, 239.2	cheance analogique	chaance		,	cheance
			caderat		caderát	3s fut	>											344	phonét.	cherra
			cadere		cádere	lc	>	°cadēre	°	cadḗre		>						239.2	cheoir analogique	chaoir		,	cheoir
			°cadūtu	°	cadū́tu	part	,	°cadūta	°	cadū́ta		>						222.3, 239, 239.2, 240	phonét.	cheu
			cæcu		cæcu		>											212, 212.4, 224.3, 311, 318	phonét.	cieu		,	ciu	< pic ?																								‘aveugle’
			cælu		cælu		>											97.1, 210, 307, 331	ae > ɛ cas général	ciel		=	chiel	pic
			caementu		caeméntu		>											241.2	dissimilation	ciment
			Caesar		Cáésar		>											97.2b	phonét.																														Kaiser
			Caeseris		Cáéseris		,	Caesaris		Cáésaris		>						237	variation
			calamellu		calaméllu		>											239, 248.1	influence labiale	chalemel
κάλαμοϛ		>	calamu		cálamu		>											237, 259, 291	phonét., apophonét.onie	chaume
			calce		cálce		>											112, 256, 259.4, 373	phonét.	chals		,	chalz		>	chauz
			calceāre		calceāre		>											207, 283	phonét.	chaucier		,	chaussier
			calcitrāre		calcitrā́re		>											335.2
			calda		cálda		>											175	phonét.	chaude
			caldāria		caldā́ria		>											174.2, 175	évolution suffixe obscure	chaudiere
			calendāriu		calendā́riu		>											174.2	obscur	calendier
			calēre		calḗre		>											239	phonét.	chaloir
			calice		cálice		>											371		calice
			calidu		cálidu		>											252.1, 256, 264.4, 370, 372	phonét.	chalt	Fragmentde Valenciennes	>	chaud
			calōre		calṓre		>											219.5, 239	phonét.	chaleur
			calumnia		calúmnia		>											105.7, 190.1, , 239, 291.3	emprunt, chalenge obscur	chalonge		,	chalenge
			calumniāre		calumniā́re		>											190.1, 291.3	chalengier obscur	chalongier		,	chalengier																									‘accuser’
			calva		cálva		>											289	phonét.	chauve
			calvu		cálvu		>											289.6	phonét.	chauf
			cambiāre		cambiā́re		>											67, 175, 285	phonét.	changier
			°cambiu	°	cámbiu		>											258	phonét.	change
			camellu		caméllu		>											239	phonét.	chamel
			camēlu		camḗlu		>											239	phonét.	chamoil																												‘chameau’
καμάρα	‘voûte’	>	camera		cámera		,	camara		cámara		>						12.3, 59, 93, 105.1, 237, 292, 303.1	phonét.	chambre		=	cambre	pic
			Camerācu		Camerā́cu		>											318.2	phonét.	Chambray	Eure	,	Cambrai	Nord
			Camerācum		Camerā́cum		>											292	phonét.
			camīnāta		camīnā́ta		>											239	phonét.	cheminee
			°camīnu	°	camī́nu		>											239	phonét.	chemin
			camīsia		camī́sia		>											191, 239	phonét.	chemise
			°camoria	°	camória		>											287	évolution retardée (diverses raisons)	chamorge																												‘morve’
			°camōria	°	camṓria		>											239	phonét.	chamoire																												‘morve de cheval’
			campānia		campā́nia		>											175	phonét.	champagne
			campānia		campā́nia		>											361.i		champignuel
			campu		cámpu		>											105.7, 175, 256, 264.4, 356, 372, 374	phonét.	champ	sg	,	chans	pl
			canāle		canā́le		>											239	phonét.	chanel
			canāle		canā́le		>											206.8	substitution de suffixe : savant ‑al	chenel
			°canapūtiu	°	canapū́tiu		>											192.5, 239	variation	chanevuis		,	chenevis
			cancellāriu		cancellā́riu		>											182.2, 242.4	phonét.	chancelier
			canceru		cánceru		>											112, 116.3, 139.2, 242.4, 349.2	variation	chaintre		,	chancre
			cane		cáne		>											207.2, 379	maintien irrégulier du yod	chien																					chien
			canīcula		canī́cula		>											236, 239	phonét.	chenille
			°canīle	°	canī́le		>											239	phonét.	chenil
κάνναϐιϛ		>	cannabim		cánnabim	lc	>	°canapu	°	cánapu		,	°canape	°	cánape		>	237, 259, 269	phonét., apophonét.onie	chanve		,	chanvre
			°cannabula	°	cannábula		>											54, 239, 343	phonét.	chanole		,	chenole																									‘nuque, trachée’
			canonicu		canónicu		>											239, 272.6, 288	phonét.	chenoine		,	chanonie		>	chanoine
			cantāmus		cantā́mus	1p	>											292.8	variation (graphique)	chantomps
			cantant		cántant	3p	>											159.1, 236	phonét.	chantent
			cantāre		cantā́re		>											12, 105.1, 264, 266	phonét.	chanter		=	canter	pic
			cantat		cántat	3s	>											236	phonét.	chante
			cantātōre		cantātṓre		>											175, 219.5	phonét.	chanteor		,	chanteur
			cantāvi		cantā́vi	1s pf	>											224.3, 234	phonét.	chantai
			canticu		cánticu		>											371		cantique
			Cantiliācu		Cantiliā́cu		>											207.1c	phonét.	Chantilly
			cantiōne		cantiṓne		>											97.1, 139, 139.2, 142, 144.1, 148.4, 284	phonét.	chançon		=	canchon	pic
			cantor		cántor	nom sg	>											251, 329	phonét.	chantre	CSs
			capillātūra		capillātū́ra		>											236	phonét.	cheveleure
			capillos		capíllos		>											184	phonét.	cheveus
			capillu		capíllu		>											239, 296.5, 307.3	analogique	chevel
			capistru		capístru		>											140, 182, 239, 319	phonét.	chevestre
			capitāle		capitā́le		>											173	phonét.	chatel
			capitaneu		capitáneu		>											270	phonét.	chadaine		,	chataigne																									‘capitaine’
			capitāneu		capitā́neu		>											105.7	emprunt	chevetaigne
			capitellu		capitéllu		>											266, 267, 270, 270.1	variation	chadel		,	chael																									‘chef (militaire)’
			°capitine	°	capítine		>											299	phonét.	chevesne
			capitiu		capítiu		>											239, 283.6	savant	chevez		,	chavez
			capitulu		capítulu		>											65.2, 68.2, 345.4, 371	substitution de sonante	chapitre		,	chapitle		,	chapitele
			cappa		cáppa		>											105.7, 296	phonét.	chape
			cappellu		cappéllu	acc sg	,	cappellōs		cappéllōs	acc pl	>						127, 137, 181	variation	chapel	sg	,	chapeaux	pl	,	chapiaux	pl
			capra		cápra		>											105.1, 333, 334, 340	phonét.	chievre		=	kievre	pic
			capreolu		capréolu		>	°caprjolu	°	caprjólu		>						216.4, 276.1	perte irrégulière et ancienne de yod (ou i)	chevruel		,	chevreul
			°caprōne	°	caprṓne		>											239	phonét.	chevron
			capsa		cápsa		>											298	phonét.	chasse
			°captiāre	°	captiāre		>											139, 207, 284, 284.3, 284.5	phonét.	chacier
			captīvu		captī́vu		>	°cactīvu	°	cactī́vu		>						221.4, 313.2	phonét.	chaitif																					chétif
			capulu		cápulu		>											334, 341	phonét.	chable
			caput		cáput		>	°capu	°	cápu		>						254, 306, 311, 313.2, 385	phonét.	chief		,	chef																		chief
			caragiu		carágiu		>											239	phonét.	charai																												‘sortilège’
			carāmente		cárāménte		>											236.1	phonét.	chierement
			carbōne		carbṓne		>											220.1	phonét.	charbon
			carcere		cárcere		>											93, 112, 116.1, 116.2, 139, 139.2, 142, 349, 349.2	variation	charcre		,	chartre
			cardine		cárdine		>											67, 68.1	phonét.	charne
			Carentomagu		Carentómagu		>											246.5	phonét.	Carenton		,	Carentan
			cāritāte		cāritā́te		>											206.7	phonét.	charte		,	cherte
			carmen		cármen		>											291.3	phonét.	charme
			carmināre		carminā́re		>											291.3	phonét.	charmer																												‘enchanter’
			carnāle		carnā́le		>											206.8	phonét.	charnel
			carne		cárne		>											374		char	Rol
			Carolu		Cárolu		>											259, 259.5, 370	phonét.	Charle		,	Karlo	Serm
			°carōnia	°	carṓnia		>											188, 239	phonét.	charogne
			carpinu		cárpinu		>											244, 258, 258.1, 291.3, 292.10	phonét.	charme	arbre
			carru		cárru		>											105, 107, 173.1, 200, 244, 255, 291.4	phonét.	char
			carrūca		carrū́ca		>											322	phonét.	charrue
			°carrūcāre	°	carrūcā́re		>											128	phonét.	charruer		,	charruier
			cartula		cártula		>											334, 348	phonét.	chartre
			°Cartunes	°	Cártunes		>											68, 250.1	substitution de sonante	Chartres
			cāru		cā́ru		>											100.1, 105.1, 200, 200.4, 206.7, 207, 244, 307, 331, 350, 385	phonét.	chier		>	cher																		chier
			casa		cása		,	casu ?		cásu ?		>						260.5	chies, ches proclise, analogie ou < casu	chiese		,	chese		,	chies		,	ches																			‘maison’
			casālis		casā́lis		>											239	phonét.	chasel																												‘métairie’
			casta		cásta		>											175.5	savant	chaste
			castanea		castánea		>											175	phonét.	chastaigne
			castellu		castéllu		,	°castellōs	°	castéllōs	acc pl	>						175, 181, 303	variation	chastel		,	chasteaux	pl	,	chastiaux	pl																						castle
			castigāre		castigā́re		>											93.1, 175, 267, 271, 323	phonét.	chastiier
			castīgat		castī́gat	3s	>											323	phonét.	chastie
καταϐολή		>	°catabola	°	catábola		>											235.4	phonét.	chaable		,	chable																									‘châblis’
			Catalaunis		Cataláúnis		>											235.4, 261, 345	phonét.	Chaelons
			°catalectu	°	cataléctu		>											235.4, 261	phonét.	chaelit
			catellu		catéllu		>											239	phonét.	chael																												‘jeune chien’
			catēna		catḗna		>											215, 235.4, 239	phonét.	chaeine
			°catēniōne	°	catēniṓne		>											182.2, 235.4, 260.3	variation, croisement avec tignon ?	chaeignon		,	chaignon		,	chignon																						‘collier’
			cathedra		cathédra		>											85, 235.4, 239, 334, 365	phonét.	chaiere
			Catomagu		Catómagu		>											217.1, 246.5, 320.2	phonét.	Caem		,	Caðun
			cattu		cáttu		>											255	phonét.	chat
			Caturigas		Catúrigas	celt	>											271	phonét.
			caule		cáúle		>											223.2	chou analogique	chol
			caules		cáúles	pl	>											223.2	phonét.	chous	CRp
			caumāre		caumā́re		>											246	phonét.	chomer
			°caumat	°	cáúmat	3s	>											223.3	phonét.	chome
			causa		cáúsa		>											10, 13, 70.1, 105, 223, 309, 315, 325, 325.1, 359, 383	phonét.	cosa	Serm	,	chose	[z]																	chose		,	chouse
			cavea		cávea		>											50, 105.5, 285.2, 298	jaie chute précoce de la labiale, cage emprunt au picard, normand	jaie		,	cage		,	chage																						‘cage’
			°caveola	°	cavéola		>											148, 285.2	chute précoce de la labiale	jaiole		,	jaole
			°cecinu	°	cécinu		>											112	phonét.	cisne
			cēlāre		cēlā́re		>											241	phonét.	celer
			cellārium		cellā́rium		>											97.2b	phonét.																														Keller
			cēnsu		cḗnsu		>											291.4	phonét.	cens
			centu		céntu		>											95, 97, 99, 104	phonét.	cent
			cēpa		cḗpa		>	cæpa		cæpa		>						213.5, 214	ae > e cas minoritaire	cive
			cēra		cḗra		>											49.1, 97, 100, 214	phonét.	cire
κέρασοϛ, κερασόϛ		>	cerasia		cerásia	pl	>	°ceresia	°	cerésia		>						179.4, 237	phonét.	cerise
			cerasum		cérasum		>											97.2b	phonét.																														Kirsche
			cerebellu		cerebéllu		>											267, 269, 295, 302, 307	phonét.	cervel
			cerebrum		cérebrum		>											335.1a
			cēreu		cḗreu		>											49, 49.1, 150, 278.1, 279, 287, 371.2	cerge savant, cirge savant et analogique, cierge disputé	cerge		,	cirge		,	cierge
			cerva		cérva	lc	>	cervia		cérvia		>						177	phonét.	cierge		,	cerge																									‘biche’
			Cervedūnum		Cervedū́num		>											270, 270.3	phonét.	Cervon	Nièvre
			cervēsia		cervḗsia		>											289	phonét.	cervoise
			cervu		cérvu		>											176, 289.6, 374	phonét.	cerf		,	cerfs	pl
			chīrurgia		chīrúrgia		>											281	phonét.	cirurgie
			chīrurgicu		chīrúrgicu		>											272	phonét.	surge																												‘chirurgien’
			Chlodoward		Chlodoward	frk	>											319.7	phonét.	Clouard
χρῖσμa		>	chrisma		chrísma													259.6	phonét.
			christiānu		christiā́nu		>											66.5, 288	savant	crestien		,	chrestiien
			Christophoru		Christóphoru		>											68.2	substitution de sonante	Christophle
			cicer		cícer		>											97.2b, 112, 117.5, 117.7, 329, 346.1	phonét.	ceire		>	çoire		=	cedre	jud.fr.																						Kicher
			cicōnia		cicṓnia		>											322	phonét.	ceoigne
			cicūta		cicū́ta		>											322	phonét.	ceue
			°cīliu	°	cī́liu		>											182.3, 191.2	suffixe -iliu > °-īliu	cil
			cinctūra		cinctū́ra		>											136, 184, 184.2	phonét.	ceinture
			cinere		cínere		>											97, 116.3, 250, 292	phonét.	cendre
			cinge		cínge	2s impér.	>											134	phonét.	ceing		,	cein
			cingere		cíngere		>											184, 349	phonét.	ceindre
			cingit		cíngit	part. pass.	>											97.4	phonét.	ceint
			cingula		cíngula		>											349	phonét.	cengle
			°cīnquanta	°	cīnquánta		>											191	i probablement analogique	cincante
			cinxīsti		cinxī́sti	2s pf	>											136	phonét.	ceinsis
			cippu		cíppu		>											182, 264.6, 296, 313.2	phonét.	cep
			circinu		círcinu		>											67, 258	phonét.	cerne
			circulu		círculu		>											334, 349	phonét.	cercle
			cista		císta		>											97.2b	phonét.																														Kiste
κιθάρα		>	cithara		cíthara		,	citera		cítera		>						237	variation	citre
			cīvitāte		cīvitā́te		>											97, 191, 206.7, 224.3, 242, 259.3, 265, 298	phonét.	cite	Alex	,	ciutat	Lég 141	,	ciptet	Alex 42	,	citet	Rol 5
			°cīvite	°	cī́vite		>											191, 224.3, 259.3	ph ?	cit																												’cité’
			clāmo		clā́mo	1s	>											254.2	analogique	claim
			clāru		clā́ru		>	°clārēa	°	clā́rēa		>						174.2	phonét.	glaire																												‘blanc d'œuf cru’
			clāru		clā́ru		>											206	phonét.	cler
			°clauderat	°	clauderát	3s fut	>											344	phonét.	clorra
			claudere		cláúdere		>											223, 344	phonét.	clore
			clausitura		cláúsitura		>											359		closture
			claustru		cláústru		>											193	phonét.	clostre
			clausu		cláúsu		>											223, 307	phonét.	clos
			clausūra		clausū́ra		>											246	phonét.	closure																												‘clôture’
			clave		cláve		>											333, 334, 349, 360	phonét.	clef		,	clavel
			clāvis		clā́vis		>											335.4
			clāvu		clā́vu		>											93, 205, 209, 224.3, 228, 234, 316, 318, 330, 365	phonét.	clou		,	clau		,	clo		,	cleu
			clēricātu		clēricā́tu		>											271	phonét.	clergié
			clēricu		clḗricu		>											264.4, 267, 272	phonét.	clerc
			clēta		clḗta		>											350	variation, action de la norme	cloie		>	claie
			Clippiācu		Clippiā́cu		>											285, 318.2, 207.1c	phonét.	Clichy
			°cloppicāre	°	cloppicā́re		>											29.1	phonét.	clochier
			coāgulāre		coāgulā́re		>											66, 173	phonét.	caillier
			coccu		cóccu		>											185, 313.2, 356, 374	phonét.	coc	sg	,	cos	pl																	coq
			°cocere	°	cócere		>											112, 139, 300	phonét.	cuire
			cochlear		cóchlear		>											300, 334, 346	variation	cuillier		,	coller	GDC Roman d'Alex 12e
			coctiōne		coctiṓne		>											300.8	phonét., variation	coçon																												‘marchand’
			cōda		cṓda		>											320	phonét.	coe
			Codiciacu		Codicíacu		>											283	phonét.
Κοιμητήριον		>	cœmētēriu		cœmētḗriu		,	cīmītēriu		cīmītḗriu		>	°cīmīteriu	°	cīmītériu		>	179.1, 288.1	savant, adaptation de gr η	cemetire		,	cimitire																										cemetery
			cōgitāre		cōgitā́re		>											113, 207, 270, 300	phonét.	cuidier
			cōgitat		cṓgitat	3s	>											270, 270.1	variation	cuide		,	cuie
			cōgito		cṓgito	1s	>											165, 172	phonét.	cuit
			cognitu		cógnitu		>											134, 137, 149, 256.2	obscur	cointe																												‘avisé, prudent’
			°cognoscere	°	cognóscere		>											349, 350.3	phonét.	conoistre		>																			connaître
			°colapāre	°	colapā́re		>											269	phonét.	coper
κόλαφος		>	colaphum		cólaphum	lc	>	colophu		cólophu		,	°colopu	°	cólopu		>	185, 237.1, 256, 264.4, 267, 269, 365, 369, 370, 372, 373, 374	phonét.	colp		>	coup		,	cop		,	colps	CSs, CRp, Rol
			cōlāre		cōlā́re		>											243	phonét.	coler		,	couler
			collībertu		collībértu		>											269	phonét.	culvert																												‘serf’
			colligere		collígere		>											273.1	analogique	coillir
			colligit		cólligit	3s	>											273.1	analogique	cueilt
			colligō		cólligō	1s	>											273.1	phonét.	cuele
			collocāre		collocā́re		>											190, 271.3, 271.4	phonét.	colchier		>	couchier
			collocet		cóllocet	3s subj	>											67.7, 112	phonét.	culzt
			collu		cóllu		>											185, 185.1	analogique	col
			colubra		cólubra		>	°colobra	°	colóbra		>						85, 216.3, 335.2, 337	phonét.	coluevre
			columbu		colúmbu		>											264.4	phonét.	colom
			columna		colúmna		>											292.8	variation (graphique)	colombe		,	colone		,	calumpnia		,	columpne
			cominitiāre		cominitiā́re		>											184	phonét.	comencier
			comite		cómite	acc sg	,	comes		cómes	nom sg	>						51, 185, 217, 231, 242, 259, 270, 367, 370, 372	phonét.	conte	CRs	,	comte	CRs	,	cuens	CSs	,	quens	CSs, Rol
			commeātu		commeā́tu		>											285	phonét.	congié
			commūnicāre		commūnicā́re		>											190.1, 268.1, 267, 271.1	comengier dissimilation, comuniier savant	comengier		,	comuniier
			companiōne		companiṓne		>											130, 134	phonét.	compagnon
			Compendiu		Compéndiu		>											178.1	probablement dialectal	Compiègne
			comprēndere		comprḗndere		>											348	phonét.	comprendre
			computat		cómputat	3s	>											84.2	phonét.	conte
			computo		cómputo	1s	>											185	phonét.	conte
			con+locat		con+locat	3s	>	collocat		cóllocat		>						84.2	phonét.	couche
			conciliu		concíliu		>											68	emprunt tardif	concilie		,	concile		,	concire
			conclūdere		conclū́dere		>											349	phonét.	conclure
			conclūsu		conclū́su	cf. conclūdere	>											222.1	phonét.	conclus
			cōnfectus		cōnféctus		>											335.1a
			conficere		confícere		>											112, 183.2	résolution de bonne heure de la vélaire	confire
			cōnfīciō		cōnfī́ciō		>											335.1a
			Confluente		Confluénte		>											289.7	phonét.	Conflans	Sainte-Honorine, Yvelines
			confūsu		confū́su	cf. confundere	>											222.1	phonét.	confus	adj.
			cōnsecrāre		cōnsecrā́re		>											335.1a
			°conserviu	°	consérviu		>											285	phonét.	concierge
			consiliu		consíliu		>											182.3, 191.2, 291.5	phonét.	conseil	CRs	,	conseuz	CRp
			cōnsuere		cōnsúere		>	°cōnsere	°	cṓnsere		>	°cōsere	°	cṓsere		>	93, 292, 292.9	variation	costre		,	cosdre
			°consuētūdine	°	consuētū́dine		>											289.1	phonét.	costume
			consūtu		consū́tu	cf. consuere	>											222.1	phonét.	cousu
			°consūtūra	°	consūtū́ra		>											244	phonét.	costure		,	cousture
			contra		cóntra		>											185, 288.1	phonét.	contre																													contrary
			°conucula	°	conúcula		>											245, 226, 232	phonét.	conoille		,	quenoille
			conventu		convéntu		>											166.1, 243	chute erratique de n en coda	covent		,	couvent																									‘accord’ (couvent)
			cōperculu		cōpérculu		>											349	phonét.	couvercle
			cōperit		cṓperit	3s	>											216.3	phonét.	cuevre
κόφινοϛ		>	cophinu		cóphinu		>											68.2, 250.1, 298.1	substitution de sonante	cofre
			coquīna		cóquīna		>	°cocīna	°	cocī́na		>						97, 139, 324.6, 388	phonét.	cuisine																					cuisine		,	cuirene
			coquu		cóquu		>	cocu		cócu		>						218	phonét., formes en -ieu dissimilation	cous	pl, Rol 1817	,	queu		,	keu		,	kieu
			cor		cór		>											12, 13, 90, 216, 264, 307, 310, 329	variation	cuer		,	quer	Rol 2356	,	quor	Alex 166	,	coer	Rol 299	,	cor
			°corāticu	°	corā́ticu		>											272	phonét.	corage
			corbicula		corbícula		>											188	o irrégulier	corbeille
			Corduba		Córduba		>											93	phonét.	Cordes
			Corduba+eis-ier		Córduba+eis-ier		>											93	variation	corvoisier
			coriu		córiu		>											186, 284	phonét.	quir		,	cuir
			cornu		córnu		>											185, 256, 258.1, 291.4, 291.5, 370, 373, 374	phonét.	cor		,	corn	CRs, Rol	,	corz	CSs	,	corns	CSs, CRp
			corōna		corṓna		>											37.1, 73, 220, 243, 245	phonét.	corone		,	couronne		,	querone
			corpus		córpus		>											256, 356, 370, 373, 374	phonét.	cors		,	corps	CSs, CRp, Eul, StLég				,	cos	pl
			corrigia		corrígia		>											148, 281	phonét.	correie
			corrogāta		corrogā́ta		>											317.3	phonét.	corvee
			°corrotulāre	°	corrotulā́re		>											345	phonét.	croler
			corruptiāre		corruptiā́re		>											190.1	corecier dissimilation	corecier		,	corocier		,	courroucier
			°cortēse	°	cortḗse		>											213.6	phonét.	courtois
			corvu		córvu		>											289.5, 372	irrégulier	corbel		,	corp
κόσμοϛ		>	cosmos		cósmos													259.6	phonét.
			costa		cósta		>											185, 363	phonét.	coste		>	cote
			Cotiu		Cótiu		>											186	phonét.	Cuis
			cotōneu		cotṓneu		>											243.2	phonét.	cooin		,	coin
			coxa		cóxa		>											186	phonét.	cuisse		,	coisse	Serm
			crassia		crássia		>											140, 284	phonét.	craisse
			crātīcula		crātī́cula		>											235.3, 235.4, 240.1	variation	graille		,	greille
			°crātīculu	°	crātī́culu		>											235.3, 235.4, 240.1	variation	grail		,	greil
			crēdentia		crēdéntia		>											180, 284	phonét.	creance
			crēdere		crḗdere		>											333, 334, 344, 349	phonét.	creire
			°cremere	°	crémere		>											211.1, 350	analogique	criembre
			crepō		crépō	1s	>											350	phonét.	crieve		,	creve
			crēscere		crḗscere		>											112, 116.1, 140, 140.1, 149, 183, 349	phonét.	croistre		>	croitre
			crēta		crḗta		>											49, 88, 213, 350	phonét.	creie		>	croie		>	crwee		>	craie	13e
			crīne		crī́ne		>											333, 334	phonét.	crin
			°crīnūtu	°	crīnū́tu		>											224.2	phonét.	crenu																												‘à longue crinière’
			crispu		críspu		>											256, 372, 374	phonét.	cres	pl	,	cresps	pl		creps	pl		cresp		,	crep																‘frisé’
			cruce		crúce		>											97.1, 350	phonét.	crois		=	crois	pic
			crūdāmente		crūdāménte		>											261	phonét.	cruement
			crūdēle		crūdḗle		>	°crūdāle	°	crūdā́le		>						206.8	phonét.	cruel
			crūdu		crū́du		>											222	phonét.	cru
			cubāre		cubā́re		>											73, 89, 243, 316, 317, 319	variation	cover		,	couver
			cubat		cúbat	3s	>											202, 219.2	phonét.	couve
			cubitu		cúbitu		>											51, 93, 259, 267, 268, 270	variation	cote		,	coute		,	code		,	coude
			cuculla		cucúlla		>											243.2	phonét.	coolle		,	coule
			cucumere		cucúmere		>											292	phonét.	concombre
			cucurbita		cucúrbita		>											243.2, 270, 322	phonét.	coorde		,	courde		,	coorge
			culcita		cúlcita		>											112, 112.1, 112.3, 114	variation	coustepointer	‘garnir intérieurement de coton’ (1419)	,	coustes	pl	,	cousterie	‘métier des coutiers’ (1347)	,	coustepointe	‘couverture de lit ouatée et piquée’ (1290–1416)	,	coilte	,	cuilte	,	coute	,	coite	,	couste
			culpa		cúlpa		>											190	phonét.	colpe
			cūlu		cū́lu		>											222, 254, 356	phonét.	cul	sg	,	cus	pl
			cumulāre		cumulāre		>											190, 292	phonét.	combler
			cumulu		cúmulu		>											250	phonét.	comble
			cuneāta		cuneā́ta		>											134, 188	phonét.	coigniee		,	cognee
			cuneu		cúneu		>											255, 277, 283	phonét.	coing
			cunnu		cúnnu		>											166.2, 255	phonét.	con
			cūpa		cū́pa		>											72, 222, 317, 319	phonét.	cuve
			Cupedonia		Cupedónia		>	Covedonia		Covedónia	attesté en 1006, Nègre 10234	>						270, 270.3	phonét.	Couvonges	Meuse
			°cupidietāre	°	cupidietā́re		>											183	phonét.	coveitier		,	covoitier
			°cūpriu	°	cū́priu		>											139, 149, 284, 67.6, 139.1, 284.5	phonét.	cuivre
			cūrātu		cūrā́tu		>											296.4	phonét.	curé		,	curré
			currere		cúrrere		>											221.3, 255.3, 292	refait	courre		,	corre
			curvāre		curvā́re		>											289.5	irrégulier	corber
			custor		cústor		>											251	phonét.	costre	CSs																											‘sacristain’
			dalmatica		dalmática		>											288	emprunt au latin	daumaie		,	daumaire																									‘vêtement liturgique’
			damnāre		damnā́re		>											292.8	variation (graphique)	dampner
			damnātiōne		damnātiṓne		>											292.8	variation (graphique)	dampnatio
			damnu		dámnu		>											256.2	variation	dan		,	dam
			°danisca	°	danísca		>											182.6	phonét.	danesche
			dare		dáre		>											335.1a
			dē eā rē		dē eā́ rē		>											281	phonét.	giers																												‘donc’
			deaurāre		deaurā́re	lc	>	°daurāre	°	daurā́re		>						246	phonét.	dorer
			dēbeo		dḗbeo	1s	>											285.2, 366, 374	dei dû à la chute précoce de la labiale	dei		,	deif
			dēbēre		dēbḗre		>											213.4, 241, 319	phonét.	deveir		>	devoir
			dēbet		dḗbet	3s	>											298.4, 366, 373	phonét.	deift		,	dift	Serm	,	deit
			dēbita		dḗbita		>											242, 265, 266, 270	phonét.	dete
			decānu		decā́nu		>											183, 207	phonét.	deien		>	doien		,	doiien
			decem		décem		>											179, 312.1, 375, 380	phonét.	dis																					dix
			decimu		décimu		>											112, 258, 291	phonét.	disme
			dēcipere		dēcípere		>											214.4, 340	FC refait	deceivre
			defensu		defénsu		>											319.3	savant	defois																												‘défense’
			dēforis		dēfóris	dē+foris	>											216.5, 261.1, 317, 319, 319.3	absence diphtongaison obscure	defuer		,	defors		>	dehors		,	deors
			dēlicātu		dēlicā́tu		>											88, 184	phonét.	deugie																												‘délicat’
			delphīnu		delphī́nu		>											182.5	variation	daufin		,	delfin
			demorat		demórat	3s	>											369
			°dēnārāta	°	dēnārā́ta		>											260.1	phonét.	deneree		>	denree
			dēnāriu		dēnā́riu		>											174.2, 241	évolution -āriu obscure	denier
			dente		dénte		>											12, 264, 180	phonét.	dent
			derbita		dérbita		>											176.2, 273.3	variation	derte		,	dertre
			deretro		derétro		>											85	phonét.	deriere
			des + jam		des + jám		>											206.4	phonét.	desja
			°des-hring-	°	des-hring-	frk	>											292.4	phonét.	desrengier
			despicere		despícere		>											183.2	résolution de bonne heure de la vélaire	despire																												‘mépriser’
			deus		déus		>	deu		déu		>						66.2, 205, 212, 212.4, 365	phonét.	deo	Serm	,	dieu		,	diu	< pic ?
			diabolu		diábolu		>											66.5, 343, 379	savant	diaule		,	diable																		diable
διάκονοϛ		>	diāconu		diā́conu		>											66.5, 250.1, 371	savant	diacre		,	diacne
			Diana		Diana		>											281	phonét.	gene																												‘sorcière’
			dīcēbam		dīcḗbam	1s imp	>											214.2	analogique	diseie		,	disoie
			dīcēnte		dīcḗnte		>											214.2	analogique	disant
			dicerajo		dicerájo	1s fut	>											117.7	phonét.	didrai	StLég 7	,	ditrai	StLég 9
			dīcere		dī́cere		>											112	phonét.	dire
			digita		dígita		>	°dita	°	díta		>						213.7, 270.2	phonét.	deie		,	doie																									‘unité de mesure évaluée à l’épaisseur d’un doigt’
			digitāle		digitā́le		>	°ditāle	°	ditā́le		>						270.2	phonét.	deel																												‘dé à coudre’
			digitu		dígitu		>	°ditu	°	dítu		>						213.7	phonét.	deit		,	doit
			dignāre		dignā́re		>											182	phonét.	deignier
			dignitāte		dignitā́te		>											134, 206.7, 207	phonét.	deintie		,	daintie																									‘testicules du cerf’
			dīmidiu		dīmídiu		>	°dīmediu	°	dīmédiu		>						241, 241.3	analogique	demi
			°dintjan	°	dintjan	frk	>	°dintiare	°	dintiáre		>						286	phonét.	dancier
			°dīrectiāre	°	dīrectiā́re		>											241.3	perte de la voyelle initiale dès le lt	drecier
			dīrectu		dīréctu		>											241.3, 350, 350.2	perte de la voyelle initiale dès le lt	dreit		,	droit		>	dret
			discus		díscus	nom sg	>											67.7, 264.7, 350.3	phonét.	deis		>	dois																		dais							‘estrade où est dressée une table d’honneur’
			°disjunāre	°	disjunā́re		>											303, 303.3	phonét.	disner		=	dirner	pic																									dine
			°districtia	°	distríctia		>											300.8	phonét., variation	destrece
			diurnu		diúrnu		>											150, 256, 281, 291.5, 356, 372, 373.2, 374	phonét.	jorn	CRs	,	jorz	CRp	,	jor	CRp
			dīvīnu		dīvī́nu		>											241, 224.2	phonét.	devin
			dīvīsum		dīvī́sum	lc	>	°dīvīsāre	°	dīvīsā́re		>						224.2	phonét.	deviser
			°docere	°	dócere		>											112	phonét.	duire																												‘instruire’
			°dōdece	°	dṓdece		>											273, 273.3	phonét.	doce		,	doze
			doga		dóga		>											317.3, 322	variation	dove		,	doue
			dolōre		dolṓre		>											219.5, 371	phonét.	douleur		,	dolour
			domesticu		domésticu		>											272	phonét.	domesche																												‘domestique’
			°dominiariu	°	dominiáriu		>											291.3	phonét.	dangier
			°dominiōne	°	dominiṓne		>											285, 291.3	variation	donjon		,	doignon
			dominu		dóminu		>											256.2	variation	dan		,	dam																									‘seigneur’
			dominum		dóminum		>	dominum		dominúm								371
			Domne Deu		Dómne Deu		>											292.8	variation (graphique)	Dambredieu
			°domnicella	°	domnicélla		>											267, 273, 273.2	phonét.	dancele		,	donzele
			°domnicella	°	domnicélla		>											273.2, 291.3	phonét.	damoisele
			°domnicellu	°	domnicéllu		>											183, 273, 273.2	variation	dancel		,	donzel		,	dameisel		,	damoisel																			‘jeune homme’
			dōnāre		dōnā́re		>											243.1	phonét.	doner		,	duner
			dōnat		dṓnat	3s	>											299.1, 327, 344.1	phonét.	donet
			donera		donera	3s fut	>											260.1, 292.6	phonét.	donera		>	donra
			dōnu		dṓnu		>											220, 331	phonét.	don
			dormīre		dormī́re		>											188, 356	phonét.	dormir		,	dourmir
			dormit		dórmit	3s	>											242, 291.3, 366	phonét.	dort
			dormītōriu		dormītṓriu		>											231, 242, 365	phonét.	dortoir
			°dormunt	°	dórmunt	3p	>											159.1	phonét.	dorment
			dracunculu		dracúnculu		>											349	phonét.	draoncle																												‘abcès’
			drappu		dráppu		>											255, 264.4, 333, 334, 348, 356, 374	phonét.	drap	sg	,	dras	pl
			°Duācu	°	Duā́cu		>											318.2	phonét.	Douai	Nord
			dubitāre		dubitā́re		>											270, 298	phonét.	doter
			dūc		dū́c	2s impér.	>											327	phonét.	dui
			ducem		dúcem	ltm acc sg	,	dux		dúx	nom sg	>						105.3, 313.2	savant	duc
			dūcere		dū́cere		>											112	phonét.	duire
			dūcit		dū́cit		>	°duiʦt	°	dúíʦt		>						67.7	phonét.	duist
			ductor		dúctor		>											251	phonét.	duitre	CSs																											‘chef’
			dulce		dúlce		>											112	phonét.	dols
			dulcia		dúlcia		>											283	phonét.	douce
			°dulja	°	dulja	g	>											286	phonét.	doille
			dum interim		dum ínterim		>											224.3	phonét.	domentre		,	domentres																									‘pendant (que)’
			duos		dúos		>											219	phonét.	deus
			duplu		dúplu		>											250, 337.4a, 340.3, 341	variation	double		,	dovle	TL2-1971 : 40 ; 1972 : 2	,	doble
			dūrāre		dūrā́re		>											224.2	analogique	durer
			dūrat		dū́rat	3s	>											224.2	phonét.	dure
			°dūricīre	°	dūricī́re		>											273	phonét.	durcir
			dusmus		dúsmus	lat. arch.	>	dūmus		dū́mus	lc	>						259.6	phonét.
			-ēbam		-ḗbam	1s imp	>											213.3	phonét.	-oie
			-ēbant		-ḗbant	3p imp	>											213.3	phonét.	oient
			-ēbas		-ḗbas	2s imp	>											213.3, 385	phonét.	-ois																					-ois		,	-ais
			-ēbat		-ḗbat	3s imp	>											213.3, 350.3, 385	phonét.	-oit																					-oit		,	-ait
			eboreu		ebóreu		>	°ebōreu	°	ebṓreu		>						189.3, 241.2, 288.1	obscur	ivuire		,	ivire		,	ivoire																							ivory
			ēbriāca		ēbriā́ca		>											241.2	analogique	ivraie
			ēbriu		ḗbriu	lc	>	°ebriu	°	ébriu		>						67.6, 139, 179, 212.1, 284	phonét.	ivre
			ebulu		ébulu		>											93, 210, 250, 339, 341, 341.2, 341.3, 350.1, 337.4c	variation	hieble		,	ieble		,	eble
			ecce		écce		>											112, 176, 255	phonét.	eis		,	ez		,	es																						‘voici’
			°ecce hāc	°	ecce hāc		>											327, 327.1	phonét.	çai	tonique	,	sai	tonique	,	ça	atone	,	sa	atone
ἐκκλησία		>	ecclēsia		ecclḗsia		>	°ecclesia	°	ecclésia		>						179.1, 221.5, 346.2	adaptation de gr η	eglise		,	glise
ἐλεημοσύνη		>	elēmosina		elēmósina		>	°almosina	°	almósina		>						182.5, 303.3	variation	almosne		=	almorne	pic
			elephante		elephánte		>											319.3	savant	olifant
			-emere		-émere		>											211.1	-eindre analogique	-iembre		,	-eindre
ἔγκαυστον		>	encaustu		éncaustu		>											246.4	savant, obscur	enque
			engle		engle	g	>											349, 350.3	phonét.	englois
			-ēnse		-ḗnse		>	-ēse		-ḗse		>						213.6	phonét., -ois substitution de suffixe	-is		,	-ois
			-ent		-ent	3p	>											242.3	analogique	-ant
			-eolu		-éolu		,	-iolu		-íolu		>	-jolu		-jólu		>	216.4	phonét.	-uel		,	-eul
			episcopu		epíscopu		>											84.1, 371	perte de la dernière syllabe	evesque
			epistula		epístula		>											68	non-phonétique	epistre		,	epistle
			equa		équa		>											289, 300, 324	phonét.	ive																												‘jument’
			-ēre		-ḗre	inf	>											213.4, 380	phonét.	-oir																					-oir
			eremu		éremu		>											291	phonét.	herme		,	erme																									‘lieu inculte’
			erīciōne		erīciṓne		>											283	phonét.	heriçon
			-eriu		-ériu		,	-eria		-éria		>						179.2	-ier, -iere sous l'influence de -ier /-iere < -āriu, -a	-ire		,	-ier		,	-iere
			Ermedōnis		Ermedṓnis		>											270, 270.3	phonét.	Ermont	Val-d’Oise
			esca		ésca		>											176	phonét.	esche
			essere		éssere		>											116.3, 176, 250, 292, 292.9, 303, 303.1	phonét.	estre
			et		et		>											13, 35, 306, 308, 327	phonét.	ed		,	et		,	e
			°exaequāre	°	exaequā́re		>											324	phonét.	essever																												‘s'écouler’
			exagiu		exágiu		>											281, 300.8, 323.3	phonét.	essai
			°exaltiāre	°	exaltiā́re		>											284	phonét.	essaucier
			exāmen		exā́men		>											208, 328.2	phonét.	essaim		,	essain
			excaldāre		excaldā́re		>											175	phonét.	eschauder
			°ex-carbunculu	°	ex-carbúnculu		>											349	phonét.	escarboncle
			°exclāriāre	°	exclāriā́re		>											174	phonét.	esclairier
			°exclāricīre	°	exclāricī́re		>											158	phonét.	esclarcir
			°excollubricāre	°	excollubricā́re		>											337.3b	variation	escolovregier		,	escolovergier																									‘glisser, couler’
			excommūnicāre		excommūnicā́re		>											158, 271.1	savant	escomeniier		,	escomungier		,	escomengier
			excondīcere		excondī́cere		>											191.3	phonét.	escondire
			excorticāre		excorticā́re		>											158	phonét.	escorchier
			exemplum		exémplum		>											335.4
			°exfridātu	°	exfridā́tu		>											250	phonét.	esfreed	Rol 438
			exgrumāre		exgrumā́re		>											303	phonét.	esgruner																												‘égrener’
			exiliu		exíliu		>											182.3, 191.2, 300	phonét.	eissil		,	essil		,	exil
			exīre		exī́re		>											183.1, 300, 300.8	issir analogique	eissir		,	oissir		,	issir																						‘sortir’
			exit		éxit	3s	>											179	phonét.	ist																												‘(il) sort’
			exligere		exlígere		>											292	phonét.	eslire
			°expandicāre	°	expandicāre		>											158, 175	phonét.	espanchier
			exparpiliāre		exparpiliā́re		>											158, 182.2, 260.3	variation	esparpeillier		,	esparpillier
			°experīmentāre	°	experīmentāre		>											158	phonét.	espermenter
			expiatiōne		expiatiṓne		>											288	emprunt au latin	expiacion
			°explicitāre	°	explicitā́re		>											117.8, 183, 183.1	phonét.	espleitier		>	esploitier
			explicitu		explícitu		>											117.5, 117.8	phonét.	esploit
			°exquartāre	°	exquartā́re		>											173	phonét.	escarter
			°exsaniāre	°	exsaniā́re		>											287	évolution retardée (diverses raisons)	essangier
			exsūcāre		exsūcā́re		>											128, 137, 148, 151, 322.3	phonét.	essuer		>	essuier
			extempulō		extémpulō		>											335.4
			exteras		éxteras		>											179.5	phonét.	estres
			extinguere		extínguere		>											97.5	phonét.	esteindre
			extrāneu		extrā́neu		>											179.5, 287	évolution retardée (diverses raisons)	estrange
			°exvigilāre	°	exvigilā́re		>											182	phonét.	esveillier
			faba		fába		>											13, 206, 236, 308, 315, 319, 333	phonét.	feve
			fabrica		fábrica		>											54, 93.1, 165.2, 193, 337.3b, 339, 343, 371	phonét.	forge		,	faverge
			fabricāre		fabricā́re		>											337.3b , 343	variation	favrechier		,	favregier		,	favargier		,	forgier
			fābula		fā́bula		>											244, 341	phonét.	fable
			fac		fác	2s impér.	>											11.2, 13, 13.6, 125, 148.2, 209.5, 300.7, 306, 323.2, 327	phonét.	fai
			°facēbam	°	facḗbam	1s imp	>											214.2	analogique	faiseie		,	faisoie
			facere		fácere		>											53, 111, 112, 114, 114.2, 117, 139, 300, 346	phonét.	faire
			facia		fácia		>											66, 97.1, 121, 283	phonét.	face		=	fache	pic
			faciēbat		faciḗbat	3s imp	>											276.1	perte irrégulière et ancienne de yod (ou i)	faisoit
			faciente		faciénte	part. prés.	>											276.1	perte irrégulière et ancienne de yod (ou i)	faisant
			facile		fácile		>											84.1, 371	emprunt	facile
			faciō		fáciō		>											335.1a
			faciunt		fáciunt	3p	>	°facunt	°	fácunt		>						209.3, 244.1	chute précoce de la consonne intervocalique	font
			facta		fácta		>											10, 11.2, 14, 125, 137, 141.3, 149, 295, 300, 363	phonét.	faite
			factiōne		factiṓne		>											300.8, 323.3	phonét.	façon
			factu		fáctu		>											117.5, 365	phonét.	fait
			factus		fáctus		>											335.1a
			°fagīna	°	fagī́na		>											98	phonét.	faine
			°fagīna	°	fagī́na		>											98	phonét.	faine
			fāgu		fā́gu		>											93, 205, 209, 209.2, 234, 318, 322	phonét.	fo		,	fou		,	fau																						‘hêtre’
			falce		fálce		>											112, 259.4	phonét.	fals		,	falz
			falcōne		falcṓne		>											175, 220.1	phonét.	faucon
			falsu		fálsu		>											256, 291.4	phonét.	fals		>	faus
			fame		fáme		>											12, 166.2, 208, 254, 307, 328.3, 331, 333	phonét.	fain
			°fanga	°	fanga		>											105	phonét.	fange
			fantagma		fantágma		>											223.3	phonét.	fantome
φάντασμα		>	fantasma		fantásma													259.6	phonét.
			°fare-ayyo	°	fare-áyyo	fut 1s	>											235.3	variation	ferai
			farīna		farī́na		>											221, 235.3	variation	farine		,	ferine
			°farsuraceu	°	farsuráceu		>											292	phonét.	fastras
			°fascellu	°	fascéllu		>											181	variation	faisel		,	faissel		,	faisseaux	pl	,	faissiaux	pl
			fascia		fáscia		>											140, 283	phonét.	faisse
			fascināre		fascinā́re		>											303	phonét.	faisnier
			fata		fáta		>											204.1	phonét.	fee
			°fatidu	°	fátidu		>											259	phonét.	fade
			°fātūtu	°	fātū́tu		>											222.3, 240, 384.iii	irrégulier	feu	[fəy]																				feu
			favōre		favṓre		>											319.4	emprunt (au latin)	favor
			febre		fébre		>											54, 333, 334, 340	phonét.	fievre
			februāriu		februā́riu		>											289.7	phonét.	fevrier
			fecerat		fecerát	3s fut	>											117.7	phonét.	fedre	Pass 188, 372
			fēcī		fḗcī	1s pf	>											213.2, 224.3	ē > ī sous l'influence du -i final	fis
			fēcit		fḗcit	3s pf	>											112, 213.2, 224.3	ē > ī sous l'influence du -i final	fist
			fel		fél		>											152.2, 210, 310, 329	phonét.	fiel
			fēmina		fḗmina		>											291.3, 301.1, 367, 388	phonét.	feme	[fãmə]	,	femme																		femme
			fenestra		fenéstra		>											176, 241	phonét.	fenestre
			fēnu		fḗnu	lc	>	°fēnāre	°	fēnā́re		>						241.1	variation	fener		,	faner
			fēnu		fḗnu		>											215.1	foin non phonétique	fein		,	foin
			fēnuculu		fēnúculu		>											300, 335.2, 346	phonét.	fenoil
			feretru		féretru		>											59, 67, 85, 210, 348.3, 370, 371	phonét.	fiertre																												‘châsse’
			feretrum		féretrum		>											335.1a
			fēria		fḗria		>											183, 284	phonét.	foire
			fēriāta		fēriā́ta		>											183	phonét.	feirié		,	foirié
			°ferīrat	°	ferīrát	3s fut	>											292	phonét.	ferra
			ferrātu		ferrā́tu		>											182	phonét.	ferre
			ferrea		férrea		>											177	phonét.	fierges		,	ferges																									‘entraves’
			ferreāre		ferreā́re		>											284	phonét.	fergier																												‘enchaîner’
			ferru		férru		>											176	phonét.	fer
			feru		féru		>											16, 32, 69.2, 90, 210, 331, 350	phonét.	fier		,	fer
			°ferūtu	°	ferū́tu	cf. ferīre	>											222.1	phonét.	feru
			fētu		fḗtu	lc	>	°fētōne	°	fētṓne		,	foetu		fóétu		>	220.2	analogique	feon
			fevu		févu		>											317.1	variation	fieu		,	fief
			fībula		fī́bula	lc	,	°affībulat	°	affī́bulat	3s	>						248.1	influence labiale	afuble
			fīcātu		fīcātu	lc	>	°fiticu	°	fíticu		>						148.3, 270.2, 288	phonét.	fidie		,	firie	Rol278	,	fire		,	fege																			‘foie’
			fīcātu		fīcā́tu	lc	>	°ficatu	°	fícatu		>						270.2	variation	feie		>	foie		,	fie
			fide		fíde		>											213, 254, 264, 306, 311, 320.2, 350, 354	phonét.	fei		>	foi		,	feit		,	feið		,	fwe	,	fai															faith
			fidēle		fidḗle		,	°fidāle	°	fidā́le		>						206.8, 213.8	phonét., feel repose sur °fidāle, feeil et feoil sur fidēle	feeil		,	feoil		,	feel
			figmentu		figméntu		>											300	phonét.	fiment																												‘matière’
			fīlāre		fīlā́re		>											224.2	analogique	filer
			fīlat		fī́lat	3s	>											224.2	phonét.	file
			fīlia		fī́lia		>											283	phonét.	fille
			°filicāria	°	filicā́ria		>											184.4	fouchiere et fougiere dialectaux	feugiere		,	fouchiere		,	fougiere
			°fīlicella	°	fīlicélla		>											191.1, 365	phonét.	ficelle		,	filcele		>	ficele
			fīliolu		fīlíolu		>	°fīljolu	°	fīljólu		>						87, 216.4	phonét.	filluel		,	filleul
			fīliolum		fīlíolum		>											369																														‘filleul’
			fīlius		fī́lius	nom sg	>											191.1, 291.5, 302, 356, 373, 374, 380		fil	CRs, [ʎ]	,	fils	CSs	,	filz	CSs, CRp	,	fiz	CSs, CRp	,	fis									fils
			fīlu		fī́lu		>											224.2, 356	phonét.	fil	[l]	,	fis	pl																								‘cordon de textile’
			°fimāre	°	fimā́re		>											248.1	influence labiale	femer		>	fumer																									‘amender une terre’
			°fimāriu	°	fimā́riu		>											248.1	influence labiale	femier		>	fumier
			°fīmita	°	fī́mita	dérivé de fimu	>	°femita	°	fémita		>						210, 212.1	phonét.	fiente
			fimu		fímu		>	°femu	°	fému		>						211, 212.1	phonét.	fien		,	fiem		,	fiens																						‘fumier’
			findere		fíndere		>											184, 250	phonét.	fendre
			fīne		fī́ne		>											221, 291.5	phonét.	fin	CRs	,	fins	CRp
			fingebat		fíngebat	3s imp	>											97.4	phonét.	feignoit
			fingere		fíngere		>											184, 349	phonét.	feindre
			fīnīre		fīnī́re		>											221.3, 224.2	finir analogique	fenir		,	finir
			firmāmente		firmāménte		>											236.1	phonét.	fermement
			firmāre		firmā́re		>											182	phonét.	fermer
			fiscella		fiscélla		>											183	phonét.	feissele		,	foissele
			fissa		físsa		>											182	phonét.	fesse
			fistula		fístula		>											68	non-phonétique	festre		,	festle		,	fesle		,	feste
			flaccidu		fláccidu		>											112	phonét.	flaistre
			°flado	°	flado	g	>	°fladōne	°	fladṓne		>						220.2, 235.4	phonét.	flaon
			flage		flage	m. bas all.	>											254.1	phonét.	flage		,	flaige																									‘champ’
			flagellu		flagéllu		>											97, 98, 104, 122, 148, 281	variation	flaiel		,	flael
			flāgrat		flā́grat	3s	>											346	phonét.	flaire
			flamma		flámma		>											166.2, 334, 348, 388	phonét.	flame																					flamme
			flāvu		flā́vu		>											209	phonét.	flo		,	flou
			flēbile		flḗbile		>											340.3, 341.2	variation	fevle		,	fieble		,	feble		,	foible
			flōre		flṓre		>											74.2, 219, 333, 359, 365	phonét.	flour		,	fleur		,	flur	Rol2431	,	flor
			Floriācu		Floriā́cu		>											207.1c	phonét.	Fleury
			flūmen		flū́men		>											222.5	phonét.	flum		,	flun																									‘fleuve’
			fluviu		flúviu		>											288	emprunt au latin	fluevie		,	fluive		,	flueve
			focāciu		focā́ciu		>											322	phonét.	foace
			focu		fócu		>											218, 365	phonét.	fou		,	fu		,	feu
			°fodiculāre	°	fodiculā́re		>											243.2	variation	foeillier		,	fooillier
			°fodr	°	fodr	frk	>											344, 344.4	variation	fuere		,	feure		,	fuerre		,	feurre
			folia		fólia		>											36, 66, 121, 137, 171, 187, 283	phonét.	fueille		,	foille
			foliu		fóliu		>											187	phonét.	fueil		,	foil																									‘feuille’
			folle		fólle		,	folla		fólla		>						185.1, 307.3, 363	analogique	fol	masc.	,	folle	fém.
			fontāna		fontā́na		>											359		funtaine		>	fontaine
			forasticu		forásticu		>											67, 272	phonét.	forasche
			foreste		foréste		>											176, 303	phonét.	forest																													forest
			forfice		forfice		>											67, 258	phonét.	force																												‘ciseaux’
			°fōria	°	fṓria		>											189.3	étymologie incertaine	foire																												‘diarrhée’
			formāticu		formā́ticu		>											272, 358	phonét.	formage		>	fromage
			formicāre		formicā́re		>											271.1	syncope retardée	formiier
			°formīcāria	°	formīcā́ria		>											174.2, 268.1, 271.1	syncope retardée	formiiere		,	fourmiiere
			°fortaricia	°	fortarícia		>											236	phonét.	forterece
			forte		fórte		>											264.4, 291.5, 313.1, 356, 373	phonét.	fort		,	forz
			fortia		fórtia		>											139, 139.1	phonét.	force
			°fortiāre	°	fortiā́re		>											29, 30, 66, 67, 67.5, 264.1, 276, 278, 282, 284	phonét.	forcier
			fortīmente		fortīménte		>											236.1, 291.5	fortement analogique	forment		,	fortement
			fortior		fórtior		>											251	phonét.	fortre	CSs																											‘plus fort’
			fortūna		fortū́na		>											222	phonét.	fortune
			fragile		frágile		>											105.4, 371	fragile emprunt	fraisle		,	fraile		,	fragile
			fragōre		fragṓre		>											240, 322	phonét.	freor		,	freour		,	freeur		,	freur
			frāgrāre		frāgrā́re		>	°flāgrāre	°	flāgrā́re		>						207, 346, 350.4	phonét.	flairier
			Francia		Fráncia		>											283	phonét.	France
			franciscu		francíscu		>											264.7, 350.3, 385	phonét.	franceis		,	françois																		français
			frātre		frā́tre		>											225.1, 333, 334, 344, 344.1, 348, 354, 370	phonét.	fradra	Serm	,	fradre	Serm	,	freðrə		>	frere
			fraxinu		fráxinu		>											67, 258	phonét.	fraisne
			fremitu		frémitu		>											210	phonét.	friente																												‘vacarme’
			frēnu		frḗnu		>											215	phonét.	frein
			frictiōne		frictiṓne		>											300.8	phonét., variation	friçon
			frīgere		frī́gere		>											300	phonét.	frire
			°frigidāre	°	frigidā́re		>											270	phonét.	froidier																												‘refroidir’
			frīgidu		frī́gidu		,	frīgida		frī́gida		>						97.2, 117.6, 252.1, 256, 326, 350.2	phonét.	freit		>	froit		,	froide	fém.	,	frida	fém., Pompéi	,	froid	>	fret
			frīgorōsu		frīgorṓsu		>											322	phonét.	friulos
			°frisk	°	frisk	g	>	°friscu	°	fríscu		,	frisca		frísca		>	264.7, 350, 363	phonét.	fresche	fém.	,	freis	masc.	,	frois		>	frais
			°friþu	°	friþu	g	>	°exfridāre	°	exfridā́re		>						128, 320, 348	phonét.	esfreer	Rol	,	esfreier
			frūctu		frū́ctu		>											192, 365	phonét.	fruit
			frūmentu		frūméntu		>											224.2, 243	phonét.	froment		,	frument
			fugio		fúgio	1s	>											172	phonét.	fuis
			fūgīre		fūgī́re		>											98, 148, 379	phonét.	foir																					fuir
			fugitīvu		fugitī́vu		>											105.4	fugitif emprunt	fuitif		,	fugitif
			fui		fúi	1s pf	>	°fūi	°	fū́i		>						222.2	phonét.	fui
			fulgur		fúlgur	neutre	>	°fulgere	°	fúlgere		>						104, 113.3, 116.1, 139, 139.2, 140.1, 251, 329, 349	variation	foildre		,	foldre		,	foudre
			fūmāre		fūmā́re		>											224.2	analogique	fumer																												‘dégager de la fumée’
			fūmigāre		fūmigā́re		>											271	phonét.	fungier																												‘fumer’
			fūmu		fū́mu		>											224.2	analogique	fum																												‘fumée’
			°fūnāmen	°	fūnā́men		>											224.2	analogique	funain
			fundibalu		fundíbalu		>											342.1	réaction contre vl	fondefle																												‘très grande fronde’
			fūnu		fū́nu		>											224.2	phonét.	fun																												‘corde’
			°furbjan	°	furbjan	g	>											221.3	phonét.	forbir		,	fourbir
			°fūriōne	°	fūriṓne		>											284	phonét.	fuiron
			furunculu		furúnculu		>											349	phonét.	furoncle
			fuscina		fúscina		>											67, 112	phonét.	foisne																												‘trident’
			fūsiōne		fūsiṓne		>											224.3	variation	fuison		,	foison
			fūste		fū́ste		>											72	phonét.	fust
			futūtu		futū́tu	lc, cf. futuere	>	°futtūtu	°	futtū́tu		>						222.1	phonét.	foutu
			°gabaiti	°	gabaiti	frk	>											319.7	phonét.	gibier
			gabata		gábata	lc	>	°gabita	°	gábita		,	gabida		gábida	attesté (TLFi)	>	173, 237	phonét.	jatte		,	jate		,	gate
			°gabella	°	gabélla		>											239	phonét.	gevele		,	javele
			gaiu		gáiu		,	gaju		gáju		>						119, 148	phonét.	jai
			galbinu		gálbinu		>											28, 29, 29.1, 33, 67, 105, 258, 293.2, 356, 371	phonét.	jalne
			galīna		galī́na		>											239	phonét.	geline
			°galīre	°	galī́re		>											239	phonét.	jalir
			Gallaecia		Galláécia		>											176.1	savant	Galice
			°gallos	°	gallos	celt ‘caillou’	>											105.5	emprunt au celt	gal
			gamba		gámba		>											14, 105, 107, 173.1, 295, 301, 307	phonét.	jambe
			Gamundias		Gamundias		>											286	phonét.
			garƀa		garƀa	frk	>	°garba	°	gárba		>						105, 173.2	variation	jarbe		,	gerbe
			gard		gard		>											105	phonét.	jardin
καρυόφυλλον		>	gariofilu		gariófilu		>	°garofilu	°	garófilu		>						238, 239, 334, 342	phonét.	gerofle		,	girofle
			gaudia		gáúdia		>											70.1, 147, 148, 193, 281, 365	phonét.	joie
			°gaudiōsu	°	gaudiṓsu		>											224	phonét.	joyeux
			gaudīre		gaudī́re		>											247	phonét.	joir		,	jouir
			°gauta	°	gáúta		>											223	phonét.	joue
			gelu		gélu		>											152.2, 210, 350	phonét.	giel		>	gel
			gemellu		geméllu		>											248.1	influence labiale	gemel		,	gemeau		>	jumeau
			gemere		gémere		>											211, 211.1	analogique	giembre
			generu		géneru		>											250	phonét.	gendre
			genetrīx		génetrīx		>											335.1a
			genitor		génitor		>											335.1a
			genitu		génitu		>											252.1, 256	phonét.	gent
			gente		génte		>											97, 104, 281	phonét.	gent
			genuculu		genúculu		>											97, 334, 339, 346	phonét.	genoil		,	genouil
			Georgiu		Geórgiu		>											276, 280, 281	phonét.	Jorges
			germānu		germā́nu		,	germāna		germā́na		>						208.1	phonét.	germain		,	germaine
			germināre		germinā́re		>											291.3	phonét.	germer
			°gēro	°	gēro	frk	>											105, 107, 109.5	phonét.	giron
			°gibb	°	gibb		>											105	phonét.	gibet
			gīgeriu		gīgériu		>											97	phonét.	gisier
			°gilda	°	gilda		>											105	phonét.	gelde
			°gincīva	°	gincī́va		>											97, 184	phonét.	gencive
			°glacia	°	glácia		>											2.2, 94, 95, 96, 139, 139.4, 150, 277, 283, 300.2	phonét.	glace
			°gladjolu	°	gladjólu		>											216.4	phonét.	glaiol		,	glaieus
			glānde		glā́nde		>											333, 334, 349	phonét.	glant
			glārea		glā́rea		,	glāria		glā́ria		>						174.2	phonét.	glaire																												‘gravier’
			°glēnāre	°	glēnā́re		>											241.1	variation	glener		,	glaner
			glīre		glī́re	lc	>	°(g)līrōne	°	(g)līrṓne		>						224.2	(g)liron analogique	gliron		,	liron		,	gleron		,	leron																			‘lérot’
			glis‑		glis‑	celt	>											350	variation, action de la norme	gloise		>	glaise
			gloria		glória		>											66.3, 137, 149.1, 151, 288, 288.1, 350, 371	emprunt au latin	glorie		>	gloire		,	glore																							glory
			glōriōsu		glōriṓsu		>											66.5	savant	glorios		,	glorieux
			glōssa		glṓssa		>	°glōsa	°	glṓsa		>						296.5	phonét.	glose
			glūte		glū́te		>											222	phonét.	glu
			gōbiōne		gōbiṓne		>											285	phonét.	goujon
			gomphu		gómphu		>											264.4	phonét.	gon
			°Gornācu	°	Gornā́cu		>											318.2	phonét.	Gornai	Seine-Maritime
			gracile		grácile		>											29, 30, 30.2, 67, 101.1, 112, 112.1, 114, 228, 258, 300, 346	phonét.	graisle
			Graecia		Gráécia		>											176.1	forme en i savante	Grece		,	Grice
			graecu		gráécu		>											212, 213.5, 228, 311, 318	ae > ɛ cas général	grieu		,	griu	< pic ?
			grammatica		grammática		>											148.3, 288, 288.2, 299.2, 303.2, 303.3	emprunt au latin	gramaire
			grāna		grā́na		>											333, 334, 367	phonét.	graine
			grānāriu		grānā́riu		>											235.3	variation	grenier
			grande		gránde		>											264.4, 313.1, 395	phonét.	grant	[grãnt]
			grandīmente		grandīménte		>											236.1	grandement analogique	granment		,	grandement
			grandior		grándior		>											175, 251, 281	phonét.	graindre	CSs																											‘plus grand’
			°granica	°	gránica	étymon de granche, grange	,	°grania	°	gránia	étymon de gragne?	>						267, 268, 268.3, 271, 271.3, 271.5	variation	granche		,	grange		,	gragne
			graphiu		gráphiu		>											288	emprunt au latin	grafie		,	graife		,	grafe
			Gratianopolis		Gratianópolis		>											341	phonét.
			grātu		grā́tu		>											306, 311	phonét.	gret		,	gré
			gravāre		gravā́re		>											235.3	variation	grever
			°greve	°	gréve		>											350, 351	phonét.	grief		,	gref
			°grōdi	°	grōdi	frk	>	°grōdjariu	°	grōdjáriu		>						286	phonét.	gruier
			°grossia	°	gróssia		>											189.3, 284	phonét.	groisse																												‘grosseur, grossesse’
			grossu		gróssu		>											314, 349	phonét.	gros
			gruniu		grúniu		>											134, 331.2	phonét.	groing		,	groin
			°gubbu	°	gúbbu		>											255.2	phonét.	gobe																												‘engourdi’
			gubernāculu		gubernā́culu		>											175.4, 182	phonét.	governail		,	gouvernail		,	gouvernaux	pl
			gula		gúla		>											12, 219, 264, 333, 359	phonét.	gole		,	goule		,	goul		,	gueule
			°gundfano	°	gundfano	frk	>											67	phonét.	gonfanon
			gurgite		gúrgite		>	gurga		gúrga	attesté 6e siècle DEAF	>						67, 97, 188, 381	phonét.	gort		,	gorge																		gorge
			gutta		gútta		>											264.6, 296	phonét.	gote
			gutturiōne		gutturiṓne		>											158.2	chute précoce de l’atone prétonique	goitron																												‘gorge’
			habent		hábent	3p	>	°awunt	°	áwunt		>						209.3, 244.1	chute précoce de la consonne intervocalique	ont
			habeo		hábeo	1s	>											285.2	chute précoce de la labiale	ai
			°haberat	°	haberát	3s fut	>											343	phonét.	aura		,	avra
			habēre		habḗre		>											213.4, 235, 264.3, 350.3	phonét.	aveir		>	avoir		>	avar
			habes		hábes	2s	>	°as	°	ás		>						206.4	analogique	as
			habes		hábes	fut 2s	>	°-as	°	-ás		>						206.5	analogique	-as
			habet		hábet	3s	>	°at	°	át		>						206.4	analogique	a
			habet		hábet	fut 3s	>	°-at	°	-át		>						206.5	analogique	-at
			habuit		hábuit	3s pf	>											289.4	consonification retardée	out
			°habūtu	°	habū́tu		>											222.1, 240	phonét.	eu
			°hac hōra	°	hac hṓra		>											219.4	phonét.	ore		,	ores		,	or
			Haimrīk		Haimrīk	frk	>											291, 292.5	irrégulier	Henri
			halsberg		halsberg	frk	>											67, 374	phonét.	osberc		,	osbercs		,	haubert
			°hāppja	°	hāppja	frk	>											264, 264.3, 285, 285.3	phonét.	hache		>	ache
			°hardjan	°	hardjan	frk	>											264.3	phonét.	hardi		>	ardi
			°harja	°	harja	frk	>											119.2, 174.2, 286	phonét.	haire
			hasta		hásta		>											175.5, 264.3	savant, h aspiré reflète le caractère étranger du mot ?	haste																												‘lance’
			°hatjan	°	hatjan	frk	>	°hatīna	°	hatī́na		>						235.4, 384.iii	phonét.	haine																					haïne
			°hatjan	°	hatjan	frk	>	°hatīre	°	hatī́re		>						221.3, 235.4, 264.3, 320	phonét.	hair
			°hauwa	°	hauwa	g	>	°auwa	°	áúwa		>						223, 223.4	phonét.	hoe		,	houe
			°hauwa + -ellu	°	hauwa + -éllu	g, acc sg	,	°hauwa + -ellos	°	hauwa + -éllos	acc pl	>						181.1, 247	variation	hoel		,	houel		,	hoyaux	pl
			havene		hávene	g	>											68.2	substitution de sonante	havre		,	havle		,	hafne		,	havene
			hebræu		hébræu		>											212, 212.4, 350	phonét.	ebrieu		,	hebreu		,	ebriu	< pic ?
			hedera		hédera		>											335.2, 344.4, 350.1	variation	ierre		,	edre	TL 1289 : 3, 6	,	eedre	TL 1289 : 6	,	airre	TL 1290 : 4											lierre
			°helm	°	helm	frk	>	helmu		hélmu	attesté gloses de Reichenau, 8e siècle	>						181, 259, 291, 370, 372.1	phonét.	helme		,	elme		,	eaume		,	hiaume
			herba		hérba		>											7, 12, 32, 33, 91, 170, 176, 264	phonét.	erbe		,	herbe
			herbāticu		herbā́ticu		>											272	phonét.	erbage
			°herda	°	herda	g	>											176.2	variation	herde		,	harde																									‘troupe de bêtes’
			hērēditāre		hērēditā́re		>											241.2	dissimilation	ireter		,	eriter
			heri		héri		>											210, 242, 350.1	variation	hier		,	ier		,	er	entrée TL
			°heriberga	°	heribérga		>											269	phonét.	herberge
			hernia		hérnia		>											29.1, 130, 176, 264.3, 278, 283	emprunt ?	hergne
			hērōs		hḗrōs	lc	>											264.3	emprunt
			°hester	°	hester	frk	>											264.3	phonét.	hestre
			hībernu		hībérnu		>											224.2, 241.2	analogique	hiver		,	iver
			Hieronymu		Hierónymu		>											291.3	phonét.	Jerome
ἱλαρός	‘joyeux’	>	hilerus		hílerus		,	hilaris		hílaris		,	hilarus		hílarus		>	237	variation	ilaire
			°hinc ad hōram	°	hinc ad hṓram		,	°hinc hac hōra	°	hinc hac hōra		>						219.4	phonét.	encore		,	ancor		,	encor		,	d’ore en avant
			hinnīre		hinnī́re		>											264.3	h aspiré représente l'emphase ?	henir		>	hennir
			hirpice		hírpice		>											182, 258, 258.1, 259.4, 264.3, 273	h aspiré représente l'emphase ?	herce		,	herse
			hirundine		hirúndine	lc	>	°hirunda	°	hirúnda		>						241.1	variation	aronde
			hīspidōsu		hīspidṓsu		>											303	phonét.	hisdos																													hideous
			historia		história		>											288, 288.1	emprunt au latin	estorie		,	estoire		,	estore																							story
			°Hlamika	°	Hlamika	frk	>	Clamiciācu		Clamiciā́cu		>						264.3	phonét.
			°hlao	°	hlao	frk	>											264.3	phonét.	flou																												‘tiède’	lau
			°Hluþawic	°	Hluþawic	frk	>	Chlodavīcus		Chlodavī́cus		>						52.2, 264.3, 319.7	phonét.	Cloevis		>	Clovis
			°Hluþawic	°	Hluþawic	frk	>											52.2, 264.3	phonét.	Lodhuuicus	Serm	>	Lodovis		>	Loois
			°hnap	°	hnap	frk	>											264.3	phonét.	hanap																												‘écuelle’	Napf
			homicīdiu		homicī́diu		>											288	emprunt au latin	omecide		,	omecire
			homine		hómine		>											256.2, 291.3, 367, 371	variation	home		,	ome		,	homme		,	om
			homo		homo	nom sg, atone (proclitique)	>											217, 264.3, 367	phonét.	om		,	on
			homo		hómo	nom sg, tonique	>											217, 367	phonét.	huem	CSs	,	uem	CSs																								‘homme’
			honōre		honṓre		>											245	phonét.	onor		,	enor
			hōra		hṓra	base de divers composés	>											10, 13, 150, 219, 219.4, 309, 325	phonét.	ore		,	oure		,	eure
			hordeu		hórdeu		>											150, 264.3, 276, 278.3, 280, 281	phonét.	orge
			horidu		hóridu		>											252.1	phonét.	ort																												‘répugnant’
			horribile		horríbile		>											68	substitution de sonante	orribre		,	orrible
			hospitāle		hospitā́le		>											206.8, 303	phonét.	ostel																													hostel
			hospite		hóspite		>											169, 185, 242, 258, 258.1, 303	phonét.	oste		>	hôte																										host
			hoste		hóste		>											256, 258.1	phonét.	ost																												‘armée’
			hostēs		hóstēs	acc. pl	>											67.7, 144.4, 264.7	phonét.	oz	CRp																											‘troupe, armée’
			°hōstia	°	hṓstia		>											189.3	étymologie incertaine	oiste		,	oite
			°hrok	°	hrok	frk	>											264.3	phonét.	froc																												‘jupe’	Rock
			°Hrotland	°	Hrotland	frk	>											345	phonét.	Rolland
			°hū‑āre	°	hū‑ā́re		>											128	phonét.	huer		,	huier
			hūba		hūba	frk	>											319.7	phonét.	huve																												‘bonnet’
			Hūgo		Hūgo	frk	>											322.4	phonét.	Hue
			humile		húmile		>											292	phonét.	umble
			humiliāre		humiliā́re		>											288	emprunt au latin	umelier
			°hurslo	°	hurslo	frk	>	°hruslo	°	hrúslo		>						291, 292.1	phonét.	frelon																					freslonniere	15e s.	,	freslon	16e s.
-ία		>	-īa		-ī́a		>											221.5	phonét.	-ie	cf. felonie
			-iācu		-iā́cu		>											207.1c	phonét.
			ibi		ibi		>											356		iv		>	i		,	y
			idolu		ídolu		>											68.2, 371	substitution de sonante	idre		,	idle		,	idele		,	idre																			‘idole, dieu païen’
			illāc		illāc		>											327, 327.1	phonét.	ilai	tonique	,	lai	tonique	,	la	atone
			illoc		illóc		>											310, 327	phonét.	iluec		,	luec																									‘là’
			illōrum		illṓrum	poss. 3p invar. 3p pr. pers.	>											219.3	phonét.	lor		,	lur		,	leur
			illos		íllos		>											184	phonét.	eus
			im+plicat		im+plícat	3s	>											84.2	phonét.	emploie
			imagine		imágine		>											371, 371.1		imagene	Psautier d'Oxford	,	image																										image
			imbūtu		imbū́tu	cf. imbuere	>											222.1	phonét.	embu
			°impastōriāre	°	impastōriā́re		>											158.2, 207, 284	chute précoce de l’atone prétonique	empaistrier
			°impejjōrāre	°	impejjōrā́re		>											183, 183.1, 244	empirer analogique	empeirier		,	empoirier
			implicāre		implicā́re		>											184.1	phonét.	empleier		,	emploier
			imputāre		imputā́re		>											184.1	phonét.	enter
			in		in		>											307, 328.2	phonét.	en
			incantāre		incantā́re		>											175	phonét.	enchanter
			inclīnāre		inclīnā́re		>											67, 349	phonét.	incliner
			inde		inde		>											356		ent		>	en
			infante		infánte		>											184	phonét.	enfant
			īnfernu		īnférnu		>											12, 184, 264, 333	phonét.	enfer		,	enfern
			inficere		infícere		>											237
			inflāre		inflā́re		>											67, 184.1, 348	phonét.	enfler
			ingeniu		ingéniu		>											97, 178.1	probablement dialectal	engien		,	engin
			°ingreviat	°	ingreviat	3s	>											177	phonét.	engriege																												‘il accable’
			inguen		ínguen	lc	,	°inguine	°	ínguine		>						182.7	phonét.	eigne	[eɲə]
			inhortāre		inhortā́re		>											188	phonét.	enorter																												‘informer’
			injungere		injúngere		>											190	phonét.	enjoindre
			inodiāre		inodiā́re		>											148, 189	phonét.	enoiier		,	enoier
			inraucāre		inraucā́re		>											292.4	phonét.	enroer
			°inrevere	°	inrévere		>											292.4, 339, 342	phonét.	enrievre																												‘dissolu, adonné au plaisir’
			insignia		insígnia		>											283, 383	phonét.	enseigne																					enseigne
			insimul		insímul		>											68, 68.1, 227, 251, 292, 329	substitution de sonante	ensembre		,	ensemble
			īnstāmente		īnstāménte		>											236.1	MF analogique	instamment		>																			instantement
			instrūmentu		instrūméntu		>											250.3	influence labiale ?	estroment		,	estrument
			īnsula		ī́nsula		>											12, 191, 288.2, 292, 299.2, 303.2	phonét.	isle		=	idle	anglo-norm, [iðle]
			integru		íntegru		>	integru		intégru		>						85, 85.1, 86, 179.3, 335, 346, 371	entier réfection sur suffixe -ier	entir		,	entier																									‘sincère, pur’
			integru		íntegru		>											85, 86, 335, 371	phonét.	entre																												‘en bonne forme’
			integrum		íntegrum		>											335.1a
			inter		ínter		>											184, 251	phonét.	entre	prép.
			Interamnus		Interámnus		>											291.3	phonét.	Entrammes	Mayenne
			interrogāre		interrogā́re		>											182, 184.1, 317.3	phonét.	enterver
			°intortiliāre	°	intortiliāre		>											158	phonét.	entorteillier
			intro		intro	1s	>											250	phonét.	entre
			invidia		invídia		>											288	emprunt au latin	envidie		,	envie		,	envirie		,	envire
			invitiāre		invitiā́re		>											174.1	phonét.	envoisier																												‘(se) divertir’
			involāre		involā́re		>											289.1, 292.7	phonét.	embler
			īra		ī́ra		>											221	phonét.	ire
			-īre		-ī́re	inf	,	-jan		-jan	g	>	-īre		-ī́re		>	221.3, 380	phonét.	-ir																					-ir
			Isera		Ísera		,	Isara		Ísara		>						237	variation	Oise
			iterāre		iterā́re		>											344, 344.6	phonét.	errer
			iterat		íterat	3s	>											344, 344.6	phonét.	eire
			-itia		-ítia		>											183.3, 283.6	seul -eise est populaire	-eise		,	-ise		,	-ece		,	-ice		,	-oise
			-īvu		-ī́vu		,	-īva		-ī́va		>						221.4	phonét.	-if		,	-ive
			jacēre		jacḗre		>											119, 274	phonét.	gesir		,	jesir
			jacet		jácet	3s	>											207.1b	phonét.	gist
			jactāre		jactā́re		>											300.8, 323.3	phonét.	getier
			jam		jám		>											119, 206.4, 307.2, 313.2, 328.3	phonét.	ja																					jadis
			°jangalōn	°	jangalōn	frk	>											119.2, 274	phonét.	jangler																												‘plaisanter, bavarder’
			jānuāriu		jānuā́riu		>											289	phonét.	jenvier
			°jehhjan	°	jehhjan	frk	>											264.3, 274, 315.2	phonét.	jehir																												‘avouer’
			jējūnu		jējū́nu		>											222	phonét.	jeun		,	jun
			°jocāle	°	jocā́le	acc sg	,	°jocāles	°	jocā́les	acc pl	>						128, 181.1, 243.2, 322	analogique	joel		,	juel		,	jouel		,	joiaus	pl	,	joiel
			jocāri		jocā́ri	lc	>	jocāre		jocā́re		>						243.2, 274, 317, 321, 322	phonét.	joer		,	jouer
			jocu		jócu		>											10.2, 12, 119, 137, 150, 205, 218, 274, 330	phonét., formes en -ieu dissimilation	jeu		,	giu	Rol977	,	ju		,	gieu		,	jou
			jovis dīe		jovis dī́e		>											158.6	phonét.	juesdi
			jūdæu		jūdæu		>											205, 212	phonét.	juieu																												‘juif’
			jūdicāre		jūdicā́re		>											119, 192, 224.3, 299	u probablement analogique	jugier
			jūdicat		jū́dicat	3s	>											192, 224.3	phonét.	juge
			jūdicet		jū́dicet	3s subj	>											67.7	phonét.	juzt
			°jūdicu	°	jū́dicu		>											272	phonét.	juge
			jugu		júgu		>											219.6, 274, 322	jou obscur	jou		,	jeu
			juk		juk	frk	>											119.2, 274	phonét.	joc																												‘perchoir’, cf. jucher
			junctiōne		junctiṓne		>											136, 300.8	phonét.	joinsson																												‘redevance’
			junctu		júnctu		>											256.2	phonét.	joint
			juncu		júncu		>											274	phonét.	jonc
			jungebant		júngebant	3p imp	>											97.4	phonét.	joignoient
			jungente		jungénte	part. prés.	>											97.4	phonét.	joignant
			jungere		júngere		>											134, 190, 349	phonét.	joindre
			jūnīcia		jūnī́cia		>	°jenīcia	°	jenī́cia		>						224.4	phonét.	genice
			°junior	°	júnior		>											251	phonét.	joindre	CSs
			jūniperu		jūníperu		>	°jeniperu	°	jeníperu		>						224.4	phonét.	genoivre
			jūniu		jū́niu		,	iūniu		iū́niu		>						134, 192.2, 274, 291.5, 367, 387	phonét.	juin	CRs	,	juinz	CSs																	juin
			jūrāre		jūrā́re		>											107, 224.2, 274	analogique	jurer
			jūs		jū́s		>											274	phonét.	jus
			jūstitia		jūstítia		>											183.3, 283.6	savant	justice		,	justise		,	jostise
			°juvencellu	°	juvencéllu		>											184	phonét.	jovencel
			juvene		júvene		>	°jovene	°	jóvene		>						68.2, 202, 216.3, 259, 259.3, 274	substitution de sonante	juevre		,	jovene		,	juenne		,	juene		,	juevne
			juventu		juvéntu		>											243	phonét.	jovent		,	jouvent																									‘jeunesse’
			°kāda	°	kāda		>											105	phonét.	chaon																												‘lard grillé’
			kāfūr		kāfūr	arab	>											105.2	phonét.	canfre
			kausjan		kausjan	got	>											286, 365	phonét.	choisir
			°kāwa	°	kāwa	frk	>											105, 223.4	gémination de w	choe		,	choue																									‘choucas’
			kegil		kegil	frk	>											105.2	phonét.	quille
			°kīnan	°	kīnan	frk	>											105	phonét.	rechignier
			°klobo	°	klobo	frk	>											319.7	phonét.	glaon																												‘bûche’
			°krabītja	°	krabītja	g	>											235.3	variation	escrevice
			°krawa	°	kráwa	vha	>											223.4	gémination de w	groe																												‘griffe’
			°krawjan	°	krawjan	frk	>											319.7	phonét.	gravir
			°krūka	°	krūka	frk	>											105.5	variation	cruie		,	cruche																									‘cruche’
			labra		lábra		>											337.3a	variation	levre		,	levere	TL5-382 : 5-7
			lāc		lā́c	lc	>	lacte		lácte		>						174, 256, 300	phonét.	lait
			lacerta		lacérta		>											176.2	substitution de suffixe	laisarde
			lacertu		lacértu		>											176.2	substitution de suffixe	lezart
			lacrima		lácrima		>											174, 300, 334, 338, 346, 363, 371	phonét.	lairme		,	lerme		,	larme
			lacrimāre		lacrimā́re		>											346	phonét.	lermer																												‘pleurer’
			lactūca		lactū́ca		>											174, 222, 322	phonét.	laitue
			lacu		lácu		>											318	variation	lai
			laeta		láéta		>											204.1	phonét.	liee																												‘joyeuse’
			laetitia		laetítia		>											183.3, 283.6	savant, suffixe modifié	leece		,	liece		,	ledece	Alex
			laetu		láétu		>											213.5	ae > ɛ cas général	lie																												‘joyeux’
			°lambruscu	°	lambrúscu		>											264.7	phonét.	lambrois
λαμπάς, -άδος		>	lampada		lámpada		>											237.4	savant	lampe
			lāna		lā́na		>											208	phonét.	laine
			lanceāre		lanceā́re		>											283	phonét.	lancier
			lāneu		lā́neu		>											287	évolution retardée (diverses raisons)	lange																												‘étoffe de laine’
			°languīre	°	languī́re		>											97.5	phonét.	languir
			lapsu		lápsu		>											291.4	phonét.	laps
			laqueāre		laqueā́re		>	°lakeāre	°	lakeā́re		>						97.5, 207, 324.5	phonét.	lacier
			laqueus		láqueus		>											97.5	phonét.	laz
			larga		lárga		,	largu		lárgu		>						14, 256, 295, 302, 307, 357	phonét.	larc	masc.		large	fém.
			lāridu		lā́ridu		>											242	phonét.	lard
			lāta		lā́ta		>											264.3	phonét.	lee																												‘large’
			latīnu		latī́nu		>											320.3	savant	latin
			latro		látro	nom sg	>											250, 344	phonét.	lere	CSs																											‘voleur, larron’
			latrōciniu		latrōcíniu		>											244, 250	phonét.	larrecin
			latus		látus		>											260.5	phonét.	lez
			laubja		laubja	frk	>											286	phonét.	loge
			laudāre		laudā́re		>											13, 247, 308, 315, 320, 333, 359, 365	phonét.	lauder		>	loer		>	louer		,	luer
			laudat		láúdat	3s	>											204, 223, 261	phonét.	loe		,	loue	[luə]
			laudemia		laudémia		>											285	phonét.	loenge
			laudo		láúdo	1s	>											365		lo		>	lu
			lavāre		lavā́re		>											13, 35, 235, 308, 315, 319, 333	phonét.	laver
			lavat		lávat	3s	>											223.4	phonét.	leve
			lavō		lávō	1s	>											316, 318, 330.1, 360	phonét.	lef		,	leve	[læv]
			Lazaru		Lázaru		>											175, 237, 250, 292, 303.1	phonét., apophonét.onie	lazre		,	ladre
			lectiōne		lectiṓne		>											284, 300.8	phonét.	leçon
			lectu		léctu		>											172, 179	phonét.	lit
			leffur		léffur	g	>											342	phonét.	liefre		,	lefre																									‘lèvre’
			lēge		lḗge		>											98, 148, 183, 350	phonét.	lei		>	loi		,	lwe
			legere		légere		>											93, 117.6, 339, 346	phonét.	lire		,	leire	TL5‑506 : 13
			legō		légō	1s	>											311	phonét.	li
			legūme		legū́me		>											222.5, 317, 321, 322	phonét.	leun
			lēha		lēha	frk	>											264.3	phonét.	lehe																												‘femelle du sanglier’
			Lemovica		Lemóvica		>											271	phonét.
			°lendite	°	léndite		>											258	phonét.	lente
			lenticula		lentícula		>											182.4, 346	remplacement du suffixe -icula par -īcula ?	lentille
			lentu		léntu		>											180	phonét.	lent
			Leodicu		Leódicu		>											272	phonét.
			leōne		leṓne		>											66.5	savant	leon	Rol 1111	,	lion	Rol 2436
			leopardu		leopárdu		>											66.5	savant	leupart	Rol 1111	,	leopart		,	liebart
			lepore		lépore		>											90, 210, 250, 339.1, 340, 340.2, 340.3, 350	phonét.	lievre	entrée TL	,	levre	entrée TL
			°leuca	°	leuca	celt	>	°leuga	°	leuga		>	°legwa	°	légwa		>	212.2, 324, 324.1, 324.3	variation	liwe	Rol. 688	,	liue		,	live		,	lieve		,	lieuwe	,	lieue
			°leuca	°	leuca	celt	>	°ban-legwa	°	ban-légwa		>						292.4	phonét.	banlieue
			levāre		levā́re		>											12, 319	phonét.	lever
			°lēviāriu	°	lēviā́riu		>											182	phonét.	leger
			levisticu		levísticu		>											272	phonét.	luvesche
			°leviu	°	léviu		>											50, 170, 177, 285, 298	phonét.	liege		,	lege
			līberāre		līberā́re		>											64, 224.2	analogique	livrer
			līberātiōne		līberātiṓne		>											174.1	forme en oi analogiques	livroison		,	livraison
			lībertāte		lībertā́te		>											182	phonét.	liberte
			lībra		lī́bra		>											221	phonét.	livre
			licere		lícere		>											117.5	phonét.	leir																												‘être permis’
			°licere	°	lícere		>											112	phonét.	leire																												‘être permis’
			licēre		licḗre		>											96, 117.5	phonét.	leisir																												‘être permis’
			ligāre		ligā́re		>											323	phonét.	leiier
			ligātiōne		ligātiṓne		>											174.1	forme en oi analogiques	lioison
			Ligere		Lígere		>											53, 117.5, 117.6, 139	phonét.	Loire
			līma		lī́ma		>											221	phonét.	lime
			līmāre		līmā́re		>											224.2	analogique	limer
			līneola		līnéola		>											216.4	phonét.	lignuel		,	ligneul
			līneu		lī́neu		>											287	évolution retardée (diverses raisons)	linge
			Lingones		Língones		>											250.1, 349	substitution de sonante	Langres
			Lingonicum		Lingónicum		>											272.6	phonét.	Langoine
			lingua		língua		,	lingwa		língwa		>						264, 354		langue		,	lengue
			°linguaticu	°	linguáticu		>											97.5	phonét.	langage
			°lintjolu	°	lintjólu		>											216.4	phonét.	linsuel		,	linceul
			līnu		lī́nu		>											221	phonét.	lin
			locāre		locā́re		>											243.2, 351.1	phonét.	loer		,	louer
			locu		lócu		>											218	phonét., formes en -ieu dissimilation	lou		,	lu		,	leu		,	lieu		,	liu
			°Londinu	°	Lóndinu		>											250.1, 371	substitution de sonante	Londres
			longe		lónge		>											97.4, 134, 331	phonét.	loing		,	loin
			°longitānu	°	longitā́nu		>											97.4, 113.1, 136, 190, 281	phonét.	lointain
			longu		lóngu		>											97.4, 256, 264.4	phonét.	lonc
			Lothariu		Lotháriu		>											320.2	phonét.	Ludher	Serm
			°loþr	°	loþr	frk	>											344.4	variation	loire		,	luerre		,	loirre		,	leurre
			°lubricāre	°	lubricā́re		>											337.3b	variation	lovregier		,	lovergier																									‘rendre glissant’
			°lūcere	°	lū́cere		>											112, 117.5	phonét.	luire
			lūcēre		lūcḗre		>											117.5	phonét.	luisir
			lūcet		lū́cet	3s	>											192	phonét.	luist
			°lūcōre	°	lūcṓre		>											322	phonét.	luor
			lūcta		lū́cta		>											300	phonét.	luite
			lūdicra		lū́dicra		>											335.2
			°lumbeu	°	lúmbeu		>											285	phonét.	longe
			°lūminiōne	°	lūminiṓne		>											182.2, 260.3	variation	lumeignon		,	lumignon
			lūna		lū́na		>											10, 13, 37.1, 61, 72, 222, 290, 309, 325, 388	phonét.	lune																					lune		,	leune
			lūnæ dīe		lūnæ dī́e	lc	>	°lūnis dīe	°	lūnis dī́e		>						158.6, 192.1	phonét.	lunsdi		>	lundi
			lupa		lúpa		>											219.2	phonét.	love		,	louve
			Lupara		Lúpara		>											219.2	phonét.	Louvre
			lupu		lúpu		>											219.2, 318	lou, lu, loup dialectaux ou analogiques ?	leu		,	lou		,	lu
			lurida		lúrida		>											270	phonét.	lorde
			luridu		lúridu		>											256, 363	phonét.	lort		,	lourt		,	lord		,	lourd
			°lurniu	°	lúrniu		>											259	phonét.	lorgne																												‘qui louche’
			luscu		lúscu		>											264.7	phonét.	lois																												‘loucher (regard)’
			lutra		lútra		>											344.4	variation	leure		,	leurre
			mācerāre		mācerā́re		>											112, 334	phonét.	mairier																												‘pétrir’
			macru		mácru		>											174.3, 179.3, 346.2	megre, maigre savants	maire		,	megre		,	maigre
			macula		mácula		>											94, 96, 131, 149, 173, 295, 300, 336, 338, 346	phonét.	maille
			mæstu		mæstu		,	mæsta		mæsta		>						176	phonét.	mest		,	-e																									‘triste’
			magan		magan	got, vha	>	°exmagāre	°	exmagā́re		>						105.2, 174, 271	phonét.	esmaier		,	esmaiier																									‘inquiéter, troubler’
			Magdalēna		Magdalḗna		>											300	phonét.	Maudeleine
			magis		mágis		>											117.6, 401	phonét.	mais
			magistru		magístru		>											98, 148.3, 272.3	phonét.	maistre
			māior		mā́ior	nom sg	,	mājor		mā́jor		>						119, 251.2, 281.1, 329	phonét.	maire	CS
			°majju	°	májju		>											255	phonét.	mai
			°makjo	°	makjo	frk	>	°makjōne	°	makjṓne		>						286	phonét.	maçon
			Malbodiu		Malbódiu		>											287	évolution retardée (diverses raisons)
			māle		mā́le		>											206.4	variation	mel		,	mal
			male-astrūcu		male-astrū́cu		>											175	phonét.	malastru
			maledīcere		maledī́cere		>											268.1, 270, 270.5	syncope retardée	maleir		,	maudire
			maledictiōne		maledictiṓne		>											300.8	phonét., variation	maudiçon
			°malefātu	°	malefā́tu		>											267, 269, 269.2	phonét.	maufé																												‘diable’
			°malefātūtu	°	malefātū́tu		>											158.1	phonét.	malfeu																												‘misérable’
			maleficiu		malefíciu		>											319.2	demi-savant	maleviz																												‘malice’
			malehabitu		malehábitu		,	male-habitu		male-hábitu		>						51, 266, 259, 270	phonét.	malade
			male-sapidu		male-sápidu		>											298	phonét.	mausade
			malgrātu		malgrā́tu		>											349	phonét.	maugré																												‘chagrin’
			°malha	°	malha	g	>											345.5	phonét.	male
			malifatiu		malifátiu		>											267, 269, 269.2, 319.2	retard syncope	mauvais
			malva		málva		>											289	phonét.	mauve
			mandāre		mandā́re		>											97.4	phonét.	mander
			mandūcāre		mandūcā́re		>											244, 271.3, 271.4, 385	phonét.	mangier																					mangier
			manēre		manḗre		>											235	phonét.	maneir		,	manoir																									‘demeurer’ (cf. manoir)
			manica		mánica		>											175, 295, 301, 307	phonét.	manche
			manicu		mánicu		>											272	phonét.	mange
			manipulu		manípulu		>	°maniclu	°	maníclu		>						345.3	incertain																						manoil							‘anse, poignée’
			manipulum		manípulum		>	maniplum		maníplum								369
			mansiōne		mansiṓne		>											284, 371	phonét.	maison		,	maisun
			°mānsuētīnu	°	mānsuētī́nu		>											175, 289.1, 289.3	phonét.	mastin
			mansūra		mansū́ra		>											235	phonét.	masure
			mantellu		mantéllu		>											175	phonét.	mantel
			manu		mánu		>											208, 367, 373	phonét.	main		,	mainz	pl	,	mains	pl
			°marcāre	°	marcā́re	g	>											207	phonét.	marchier
			mare		máre		>											206, 242, 254	phonét.	mer
			margarīta		margarī́ta		>											64.1, 236	phonét.	margerie
			margila		márgila		>											113, 113.1, 114, 349	phonét.	marle
			margine		márgine		>											371		margene		>	marge
			marisk		marisk	frk	>	°mariscu	°	maríscu		>						264.7, 350.3	phonét.	mareis		>	marois																		marais
			marītu		marī́tu		>											221, 235	phonét.	mari
			mark-		mark-	g	>	°markēnse	°	markḗnse		>						105, 214, 214.1	phonét.	marchis
			marmor		mármor	neutre	>											251, 292.10	phonét.	marbre
			°marr- + -ella	°	marr- + -élla		>											235.3	variation	merele																												‘jeton’
			martis dīe		martis dī́e		>											158.6	phonét.	marsdi
			martiu		mártiu		>											256, 258.1	phonét.	marz
			martyre		mártyre		>											371		martre		,	martir
			masculu		másculu		,	mascel		máscel		>						259.7, 292, 303, 303.2, 303.3, 349	phonét.	mascle		,	masle		=	madle	anglo-norm	=	marle	pic																			male
			maser		maser	frk	>											292.9, 303	phonét.	masdre
			masticāre		masticā́re		>											271	phonét.	maschier
			materiame		materíame		>											284	phonét.	mairien
			materiāmen		materiā́men		>											158.2	chute précoce de l’atone prétonique	mairrien																												‘bois de construction’
			°materiāmentu	°	materiāméntu		>											158.2	chute précoce de l’atone prétonique	merrement																												‘bois de construction’
			mātre		mā́tre		>											12, 206, 290, 296.4, 344, 344.1	phonét.	medre	Alex	>	mere	Alex	,	merre
			mātrīculāriu		mātrīculā́riu		>											250	phonét.	marreglier
			matrīna		matrī́na		>											344	phonét.	marraine
			°mattea	°	máttea		>											139	phonét.	mace
			°matteūca	°	matteū́ca		>											23, 140, 284, 300.8	phonét.	maçue
			Matthæu		Matthæu		>											212	phonét.	Matieu
			mātūru		mātū́ru		>											222, 226, 232, 240, 320, 384.iii	phonét.	meur																					meur
			maximu		máximu		>											29, 30, 67	phonét.	maisme																												‘en particulier’
			medianu		medíanu		>											137, 281	phonét.	moiien
			°medicāre	°	medicā́re		>											299	phonét.	megier																												‘donner soin’
			medicīna		medicī́na		>											273, 299	phonét.	mecine																												‘médecine’
			medicu		médicu		>											210.1, 272, 288	emprunt au latin	midie		,	mie		,	mirie		,	mire		,	miege																‘médecin’
			medietāte		medietā́te		>											206.7	phonét.	meitie		,	moitie
			mediu		médiu		>											179	phonét.	mi
			°meisinga	°	meisínga	g	>											184	phonét.	mesenge
			mel		mél		>											13, 35, 90, 210, 307, 310, 310.1, 329, 350	phonét.	miel		,	mel
			Meldis		Méldis		>											181	variation
			melior		mélior		>											178, 251, 329, 329.2	phonét.	mieldre	CSs	,	mieudre		,	meldre		,	meudre	TL5-1342 : 51																		‘meilleur’
			meliōre		meliṓre		>											182.2, 283	variation	meillor		,	millor
			melius		mélius		>											165.3, 171, 178, 181.4	variation	mieuz		,	mieus		,	melz	Eul 16	,	mielz		,	mieux
			memoria		memória		>											288.1	emprunt au latin	mémoire																													memory
			°mendicitāte	°	mendicitā́te		>											112	phonét.	mendistié
			menera		menera	3s fut	>											260.1, 292.6	phonét.	menera		>	menra
			mense		ménse		>	mēse		mḗse		>						166.1, 350	phonét.	mois		>	mwe
			mensūra		mensū́ra		>											222.4	phonét.	mesure
			°mentiōnia	°	mentiṓnia		,	°mentiōnica	°	mentiṓnica		>						271.5, 287, 287.1	évolution retardée (diverses raisons) donc mençonge savant, l'étymon °mentiōnica est à écarter	mençonge		,	mençogne
			mentōne		mentṓne		>											220.1	phonét.	menton
			mercātu		mercā́tu		>											182.5, 241.1	variation	marchie
			mercēde		mercḗde		>											33, 59, 95, 97, 97.1, 99, 100, 139, 142, 214	phonét.	merci		=	merchi	pic
			mercurii dīe		mercurii dī́e	lc	>	°mercuris dīe	°	mercuris dī́e		>						158.6, 349	phonét.	mercresdi		>	mercredi
			merda		mérda		>											176	phonét.	merde
			merula		mérula	lc	,	merulu		mérulu		>						176, 244, 259.5, 292	phonét.	merle
			°mescadante	°	mescadánte		>											261, 384.iii	phonét.	mescheant																					mescheant
			mespilu		méspilu		>											348	phonét.	mesple
			messiōne		messiṓne		>											140, 284	phonét.	moisson
			metallu		metállu		>											320.3	savant	metal
			°metipsimu	°	metípsimu		>											182.8	phonét.	meesme
			meum		méum		>	°mem	°	mem	atone (clitique)	>						328.3	phonét.	mon	atone
			meum		méum		>	°mem	°	mém	tonique	>						310, 328.3	phonét.	mien	tonique
			°mīliu	°	mī́liu		>											182.3, 191.2	suffixe -iliu > °-īliu	mil
			minimu		mínimu		,	minima		mínima		>						68.3, 291.3	merme substitution de sonante	merme		,	mame																									‘petit (doigt)’
			ministeriāle		ministeriā́le		>	°ministerāle	°	ministerā́le		>						158.3	chute de i / yod	menestrel
			ministeriāle		ministeriā́le		>	°ministerāle	°	ministerā́le		>						158.3	chute de i / yod	menestrier	chgt. suffixe
			Ministeriu		Ministériu		>											158.4	phonét.	menestier	Eul 10																											‘office, service’
			minor		mínor		>											215.1, 251	moindre non phonétique	meindre		,	moindre	CSs	,	mendre	CSs
			minus		mínus		>											215.1, 329, 401	moins non phonétique	meins		,	moins
			°minūtiāre	°	minūtiā́re		>											270.4, 284	phonét.	mincier																												‘couper en menus morceaux’
			minūtu		minū́tu		>											241	phonét.	menu	adj.
			mīrābilia		mīrābília		>	°merebilia	°	merebília		>						236.2, 371	influence de l’initiale sur la prétonique	merveille		,	merveillus	Rol
			mīrāri		mīrā́ri	lc	>	mīrāre		mīrā́re		>						224.2	analogique	mirer
			°mīrātōriu	°	mīrātṓriu		>											261	phonét.	mireoir
			misculāre		misculā́re		>											292, 303.2, 303.3, 349	phonét.	mescler		,	mesler		=	medler	anglo-norm
			mīserunt		mī́serunt	3p pf	>											117.4	phonét.	misdrent
			°mistiliu	°	mistíliu		>											182.3, 191.2	phonét.	mesteil
			mitto		mítto	1s	>											244	phonét.	met
			mōbile		mṓbile		>											216, 216.3, 341, 341.2, 371	phonét.	mueble		,	moble		,	mobile																						‘mobile, mouvant, qui peut changer de place’
			modiolu		modíolu		>											122, 148, 216.4, 276, 280, 281, 281.2, 299	moieus, moyeu formes avec -s	moiuel		,	moieul		,	moieus		,	moel
			modiu		módiu		>											186, 281	phonét.	muid		,	mui		,	moi
			modu		módu		>											311	phonét.	mœt																												‘mode’
			modulu		módulu		>											255.1, 299, 334, 345	phonét.	molle
			mola		móla		>											216	phonét.	muele
			molere		mólere		>											12, 165, 185, 250, 292, 359	phonét.	moldre		>	moudre
			moletrīna		moletrī́na		>											335.1a
			molinariu		molináriu		>											291	phonét.	mounier
			°molliāre	°	molliā́re		>											283	phonét.	moillier
			monachu		mónachu		>											272.6	phonét.	monie		>	moine
μοναστήριον		>	monastēriu		monastḗriu		>	°monasteriu	°	monastériu		>						179.1	adaptation de gr η	mostier		,	moustier
			°montānea	°	montā́nea		>											129.1, 130, 130.1, 134, 283	phonét.	montagne
			montes		móntes	2s	>											67	phonét.	monz
			mori		móri	lc	>	°morīre	°	morī́re		>						243	phonét.	morir		,	mourir
			°morīrat	°	morīrát	3s fut	>											292	phonét.	morra
			morte		mórte		>											185, 256	phonét.	mort
			mortua		mórtua		>											289.7	phonét.	morte
			movēre		movḗre		>											213.4, 243	phonét.	moveir		,	movoir		,	mouvoir
			muccidu		múccidu		>											29.1	phonét.	moiste
			mūcēre		mūcḗre		>											97.1	phonét.	muisir		=	muisir	pic
			mūgīre		mūgī́re		>											98	phonét.	muir
			mūla		mū́la		>											222	phonét.	mule
			muliere		mulíere		>											66.2, 86.2d, 87, 369	phonét.	moillier																												‘épouse’
			mundu		múndu		>											190, 256, 301.1	phonét.	munt		,	mont
			mūnīre		mūnī́re		>											221.3	phonét.	munir
			mūru		mū́ru		>											222, 244	phonét.	mur
			musca		músca		>											140	phonét.	mosche
			musciōne		musciṓne		>											140, 283	phonét.	moisson																												‘moineau’
			musculu		músculu		>											259.7, 292, 349	phonét.	mouscle		,	mosle
			mūsculu		mū́sculu		>											259.7, 349	phonét.	muscle
μυστήριον		>	mystēriu		mystḗriu	lc	>	°misteriu	°	mistériu		>						158.4, 179.1	adaptation de gr η	mestier
			Namnetes		Námnetes		>											258	phonét.	Nantes
			napu		nápu		>											318	variation	nef																												‘navet’
			°nāscere	°	nā́scere		>											112, 116.2, 116.3, 137, 140, 349	phonét.	naistre
			nāsu		nā́su		>											254, 331	phonét.	nez		,	nes
			nata		náta		>											261	phonét.	nee	[neə]
			Nātāle		Nātā́le		>											235.5	obscur	noel
			nātīvu		nātī́vu		>											221.4, 235.4, 320	phonét.	naif
			nātūra		nātū́ra		>											320.3	savant	nature
			°nauda	°	náúda		>											223	phonét.	noe		,	noue
			nausea		náúsea		>											165, 172, 193	phonét.	noise
			nāve		nā́ve		>											356, 374		nef	sg	,	nes	pl
			navicella		navicélla		>											273	phonét.	nacele
			nāvigāre		nāvigā́re		>											14, 93.1, 165.2, 207, 267, 271, 295, 298, 298.3, 306	phonét.	nagier
			nebula		nébula		>											343	phonét.	nieule		,	neule		,	nieble																						‘nuage’
			necāre		necā́re		>											13, 148, 148.1, 183.1, 315, 321, 323	phonét.	neiier		,	neier		>	noiier		,	noier		,	nier
			negat		négat	3s	>											183.1	phonét.	nie
			negō		négō	1s	>											311, 318.2	phonét.	ni		,	noi
			Nemausu		Némausu	celt	>											246.4	phonét.	Nemse	a occ	=	Nismes
			nepos		népos		>											178.2	phonét.	niez	CSs	,	nies	CSs																								‘neveu’
			nepōte		nepṓte		>											219, 254, 311, 317, 319, 319.9	variation	nevud		,	nevo		,	neveu
			neptia		néptia		>											177, 178.2, 284	phonét.	niece		,	nece
			nervu		nérvu		>											256, 289.6	phonét.	nerf
			nesciu		nésciu		,	nescia		néscia		>						179	phonét.	nice																												‘sot, niais’
			°nīdicāre	°	nīdicā́re		>											271	phonét.	nichier		,	nigier
			nigella		nigélla		>											97, 98, 105.4, 148, 148.1	phonét., nigelle emprunt	noiele		,	neele		,	nigelle	emprunt
			nigru		nígru		>											14, 295, 295.2, 300, 300.6, 334, 336, 339, 346, 346.1	phonét.	neir		>	noir
			nihil		níhil		>											329	phonét.	nehel																												‘rien’
			nive		níve		>											311	phonét.	neif		,	noi																									‘neige’
			°nivicāre	°	nivicā́re		>											271	phonét.	negier
			°nocere	°	nócere		>											112, 117.5	phonét.	nuire		,	noire
			nocēre		nocḗre		>											117.5, 189.2	nuisir analogique, nuire < °nocere ou analogique	noisir		,	nuisir
			noces		nóces	2s	>											189.2	phonét.	nuis
			nocet		nócet	3s	>											186, 189.2	phonét.	nuit
			nocte		nócte		=	naht		naht	vha	>						12, 165, 172, 186, 264.3, 290, 300, 300.7, 323.2, 356, 374	phonét.	nuit	sg	,	noit	sg	,	nuiz	pl																						Nacht
			nōdāre		nōdā́re		>											243.2	phonét.	noer		,	nouer
			nōdat		nṓdat	3s	>											204.1	noue analogique	neue
			°nōdellos	°	nōdéllos	pl	>	°nōdellu	°	nōdéllu		>						181.1	variation	noel		,	noiel		,	noiaux	pl																					‘agrafe’
			nōdu		nṓdu		>											219, 308, 308.1, 311	phonét.	nout		,	noud		,	neu		,	no
			nōmen		nṓmen		>											220, 242, 328.2, 331	phonét.	nom		,	non
			nōmināre		nōminā́re		>											291.3	phonét.	nomer
			non		non		>											328.2	phonét., variation	non		,	nen		,	ne
			°nonnāne	°	nonnā́ne	nonna + -āne	>											208.1	phonét.	nonain	CRs	,	nonnain
			nōs		nṓs		>											219.3, 329, 329.1	phonét.	nous		,	nos
			nostru		nóstru		>											140, 250, 370	phonét.	nostro	Serm	,	nostre
			novellu		novéllu		>											317, 319	variation	novel
			novem		nóvem		>											216	phonét.	nuef
			Noviomagus		Noviómagus		>											246.5, 285.2	chute précoce de la labiale	Noyon	Oise
			novu		nóvu		>											90, 93, 216, 254, 306, 311, 313.2, 318, 319.5	phonét.	nuef		,	nof
			°nūba	°	nū́ba		>											89, 316, 317, 319	phonét.	nue
			nucāle		nucā́le	acc sg	,	nucāles		nucā́les	acc pl	>						128, 181.1, 243.2	analogique	noel		,	nouel		,	noiel		,	noiaus	pl
			nuce		núce		>											165, 189, 365	phonét.	noix		,	noiz		,	nois
			nucīcula		nucī́cula		>											189	phonét.	noicille		,	noisille																									‘noisette’
			nūdu		nū́du		,	nūda		nū́da		>						261, 373	phonét.	nue	fém., [nyə]		nu	masc.	,	nuz	masc.
			nūgāle		nūgā́le		>											224.2	phonét.	noaus																												‘pis (adv.)’
			nugalior		nugálior		>											251, 329	phonét.	noaldre	CSs																											‘pire’
			°nugālior	°	nugā́lior	nom sg	>											165.3, 302.2	phonét.	noaudre	CSs																											‘de moindre valeur’
			nūllu + °illūi		nū́llu + °illū́i		>											222.2	phonét.	nului																												‘nul (aucun)’
			numeru		númeru		>											292	phonét.	nombre
			nuptias		núptias	lc acc pl	>	°noptia	°	nóptia		>						91, 170, 187.1	phonét.	nuece		,	noce
			nūtrīmentu		nūtrīméntu		>											250	phonét.	norrement																												‘nourriture’
			nūtrīre		nūtrī́re		>	°nutrīre	°	nutrī́re		>						224.2, 243, 344	phonét.	norrir		,	nourrir
			nutritiōne		nutritiṓne		>											283.6	savant	norreçon
			o.i.		o.i.		>											235.3	variation	barele		,	berele																									‘jeu amoureux’
			obœdīre		obœdī́re		>											270.5	savant	obeir
			obscūru		obscū́ru		>											67, 67.6, 333	phonét.	oscur
			obstāre		obstā́re		>											14, 67, 295, 298	phonét.	oster
			occasiōne		occasiṓne		>											288	emprunt au latin	ocasion
			occāsiōne		occāsiṓne		>											174.1	forme en oi analogiques	ochoison		,	ochaison																									‘circonstance’
			occīdere		occī́dere		>											344	phonét.	ocire
			octo		ócto		>											186	phonét.	huit		,	uit		,	oit
			octōbre		octṓbre		>											189	phonét.	oitovre		,	oitouvre
			oculos		óculos	pl	>											187.3, 379	ieus dssimilation	ieus		,	uelz																		yeux
			oculu		óculu		>	oclu		óclu	AppPr 111	>						65, 93, 117.5, 187, 244, 252.1, 335.2, 339, 341.3, 346	variation	ueil		,	uel		,	oil	entrée GDC et TL
			odōre		odṓre		>											219.5, 320.3	phonét., odor savant	oudeur		,	odor	savant
			officialis		officiális		>											288	emprunt au latin	oficial
			officīna		officī́na		>											273, 273.2	variation	uissine		,	uisine
			oleu		óleu		>											288, 379	emprunt au latin	uelie		,	oeile		,	uele															huile
			Olina		Ólina		>											68.3	substitution de sonante	Orne
			ōlla		ṓlla		>											296.5	phonét.	ole		,	oule		,	eule																						‘grand pot, marmite’
			-ōne		-ṓne		>											220.1	phonét.	-on
			opera		ópera		>											216	phonét.	uevre		,	oevre
			orāclum		orā́clum		>	orāculum		orā́culum		>						335.2
			ōrātiōne		ōrātiṓne		>											174.1	forme en oi analogique	oroison		,	oraison
			orbu		órbu		>											256	phonét.	orp
			orbu		órbu		>											264.5	phonét.	orvet
			Orcada		Órcada		>											237.4	maintien de la posttonique	Ourche
			ōrdine		ṓrdine		>	°ordne	°	órdne		>						68, 250.1, 298.1, 371	substitution de sonante	ordre	Rol 3639	,	ourne		,	ordene		,	orde		,	orne
			-ōre		-ṓre		>											219.5	phonét.	-eur
ὄργανον		>	organu		órganu		>											68, 237.4, 371, 381	savant	orghene		,	orgene		,	orgue		,	orgre												orgue
			°orgoliu	°	orgóliu		>											187	phonét.	orgueil		,	orgoil
			ornāmentu		ornāméntu		>											232, 236	phonét.	ornement
			ōrnāre		ōrnā́re		>											12, 291	phonét.	orner
			°orphanīnu	°	orphanī́nu		>											236	phonét.	orfenin
ὀρφανόϛ		>	orphanu		órphanu		>											237.4, 267.2, 371	perte de la dernière syllabe	orfene		>	orfe																									‘orphelin’
			°ōrulāre	°	ōrulā́re		>											292	phonét.	orler
			osculu		ósculu		>											259.7, 349	phonét.	oscle																												‘douaire’
			°ossifrāga	°	ossifrā́ga		>											67, 269, 303.3, 323, 348.3	FC emprunt au pic	osfraie		=	orfraie	pic	>																orfraie								osprey
			ossu		óssu		>											255, 291.4	phonét.	os
			ostiāriu		ostiā́riu		>											140	phonét.	uissier
			ostrea		óstrea		>											140, 186, 186.3, 284	variation ui-oi	uistre		,	oistre
			-ōsu		-ṓsu		>											219.5	phonét.	-ous		,	-eus
			otiōsu		otiṓsu		>											219.5	phonét.	oiseus
			ovicula		ovícula		>											319, 379	variation	oeille																					ouaille
			ōvu		ṓvu		>	°ovu	°	óvu		>						216.3	phonét.	uef
			pācāre		pācā́re		>											125, 148, 174, 300.7, 306, 321, 323, 323.2, 365	phonét.	paiier		,	paier
			pāce		pā́ce		>											174, 256	phonét.	pais
			pācō		pā́cō	1s	>											318.2	phonét.	pai
			pæonia		pæónia		>											66.5	savant	peoine		,	pioine
			pāgānu		pāgā́nu		>											323, 367	phonét.	paiien		,	paiens		,	paians
			°pāgēnse	°	pāgḗnse		>											214	phonét.	pais
			pāgina		pā́gina		>											267.2, 371	perte de la dernière syllabe	pagene		>	page
			palātiu		palā́tiu		>											256, 284	phonét.	palais
			palea		pálea		>											150, 277, 283	phonét.	paille
			pallidu		pállidu		>											270, 371		palede		>	pale
			palma		pálma		>											291	phonét.	paume
			palpebra		pálpebra		,	°palpetra	°	palpétra		>						335.1a, 371		palpebre		,	palpiere	< °palpetra
			pālus		pā́lus		>											184.3	pieu emprunt au picard	pel
			pampinu		pámpinu		>											250.1, 371	substitution de sonante	pampene		,	pampe		,	pampre																						‘pétale (ou sa représentation)’
			pānāriu		pānā́riu		>											174.2	obscur	panier
			pāne		pā́ne		>											208, 254	phonét.	pain
			°pantasiāre	°	pantasiā́re		>											174.1	forme en oi analogiques	pantoisier		,	pantaisier																									‘haleter’ (cf. pantois)
			pāpiliōne		pāpiliṓne		>											182.2, 248.2, 260.3, 361.i, 383	phonét.	paveillon		,	pavillon																		paveillon
			pār		pā́r		>											310, 329	phonét.	per
			parabola		parábola		>	°paraula	°	paráúla		>						223.1, 343	phonét.	parole
			parabolāre		parabolā́re	lc	>	°paraulāre	°	paraulā́re		>						246.3, 292	phonét.	parler
			°paraulat	°	paráúlat	3s	>											246.3	analogique	parole
			parente		parénte		>											235	phonét.	parent
			°parēscere	°	parḗscere		>											112, 140, 349	phonét.	pareistre
			paria		pária	neut pl	>											49, 115.1, 116.2, 139, 146, 149, 174.2, 277, 284	phonét.	paire
			pariete		paríete		>	°parēte	°	parḗte		>						87, 158.3, 276.1	chute de i / yod	paroi
			pario		pário		>											237
			Parīsiēnse		Parīsiḗnse		>											214, 214.1	phonét.	Parisis																												‘frappé à Paris’
			parricu		párricu		>											272	phonét.	parc
			partīre		partī́re		>											221.3	phonét.	partir
			partītiōne		partītiṓne		>											267, 270.4, 284	phonét.	parçon																												‘partage’
			pāscere		pā́scere		>											112, 140, 349	phonét.	paistre
			passiōne		passiṓne		>											66.5	savant	passion
			passu		pássu		>											175, 401	phonét.	pas
			pasta		pásta		>											140, 363	phonét.	paste
			pastiōne		pastiṓne		>											140, 284	phonét.	paisson
			pastor		pástor		>											251	phonét.	pastre	CSs
			pastu		pástu		>											175	phonét.	past		,	pas
			patella		patélla		>											235.4, 5	variation, poele obscur	paele		,	paielle		,	poele
			patre		pátre		>											7, 33, 206, 242, 250, 252.1, 333, 334, 339, 344, 344.1	phonét.	pedre	Alex	>	pere	Alex
			paucu		páúcu		>											223.5, 365		pou		,	poi		,	peu
			paupere		páúpere		>											223, 383	phonét.	povre																					pauvre
			pausāre		pausā́re		>											246, 246.2, 325	phonét.	poser
			pavōne		pavṓne		>											317, 319, 220.2, 235.4	phonét.	paon
			pavōre		pavṓre		>											226, 240, 319	variation	paor		,	paour		,	pour	Rol	,	peor		,	peeur
			pectināre		péctinā́re		>											131	phonét.	peignier
			pectine		péctine		>											178.1, 300, 381	pieigne, pigne formes probablement dialectales	peigne		,	paigne		,	pieigne		,	pigne												peigne
			pectorāle		pectorā́le		>											206.8	substitution de suffixe : ‑ail	peitrel
			°pectorīna	°	pectorī́na		>											221	phonét.	poitrine
			pectus		péctus		>											179	phonét.	piz		,	pis
			pede		péde		>											126, 210, 285.1, 311, 350	phonét.	piet		,	pied		>	pie		,	pié
			pedica		pédica		>											210.2, 271	phonét.	piege
			°pedicu	°	pédicu		>											272	phonét.	piege																												‘de noble origine’
			pēduculu		pēdúculu		>											84.1, 261	phonét.	peoil		,	peouil
			pēior		pḗior		>											251.2	phonét.	pire
			pēius		pḗius		,	pējjus		pḗjjus		>						179, 281.1	phonét.	pis
			pelle		pélle	acc sg	,	pelles		pélles	acc pl	>						181, 181.2	variation	pel		,	piau		,	peaux	pl	,	piaus	pl
πελωρίδα	acc.	>	°pelōrida	°	pelṓrida		>											235.2, 241.1	variation	palourde
			°pēna	°	pḗna		>											215, 215.1, 367	phonét.	peine
			°pendicāre	°	pendicā́re		>											271.3	phonét.	penchier
			pēnsile		pḗnsile		>											259	phonét.	poisle
			pēnso		pḗnso	1s	>											244	phonét.	peis		,	pois
			pensu		pénsu		>	°pēsu	°	pḗsu		>						213	phonét.	peis		,	pois
			perdere		pérdere		>											176	phonét.	perdre
			perdo		pérdo	1s	>											244	phonét.	pert
			periclum		períclum		>	periculum		perículum								335.2
			pērīculōsu		pērīculṓsu		>											219.5	phonét.	perillous		,	perilleux
			perīre		perī́re		>											260.4	analogique	perir
			°pernula	°	pérnula		>											176	phonét.	perle
			persica		pérsica		>											271, 371	phonét.	pesche
			persōna		persṓna		>											220	phonét.	persone
			pertica		pértica		>											176, 242, 271, 271.3	phonét.	perche
			°pertūsiāre	°	pertūsiā́re		>											291	phonét.	percier
			pessimu		péssimu		>											291	phonét.	pesme																												‘très mauvais’
			pessulu		péssulu		>											259	phonét.	pesle		,	pedle
			petra		pétra		>											27, 137, 210, 344.4	phonét.	piere		,	pierre
			°petrāriu	°	petrā́riu		>											344	phonét.	perrier																												‘petit canon’
			°petrica	°	pétrica		>											30.1, 67.6, 272	phonét.	pierge																												‘chemin pierreux’
			°petrōne	°	petrṓne		>											344	phonét.	perron
			°petrosīliu	°	petrosī́liu	petrosilio attesté dans Miscellanea Tironiana, 9e siècle	>											250, 344, 361.iii	phonét.	perresil		>	persil
			°pettia	°	pettia	celt	>											177	phonét.	piece		,	pece
φλέγμα		>	phlegma		phlégma		>											181.5, 291, 300	phonét., phonét.legme emprunt	fleume																												‘lymphe’
			pīca		pī́ca		>											148, 148.3, 323	phonét.	pie
			pice		píce		>											183	phonét.	peiz		,	poiz
			pictūra		pictū́ra		>											184.2	pointure dialectal	peinture		,	pointure
			pietāte		pietā́te		>											65.6, 148.3	phonét.	pitie
			pigmentu		pigméntu		>	pīgmentu		pīgméntu	REW 6488, EM	>						191.1, 300	phonét.	piument		,	piment
			pigritia		pigrítia		>											183.3, 241.1, 283.6	savant, suffixe modifié	perece		,	paresse
			pilāre		pilā́re		>											241	phonét.	peler
			pilu		pílu		>											213	phonét.	peil		,	poil
			pingere		píngere		>											184, 184.2, 349	phonét.	peindre		>	poindre
			°pinniōne	°	pinniṓne		>											283	phonét.	pignon
			piper		píper	neutre	>	°pipr	°	pípr		>						227, 251, 329, 329.2	phonét.	peivre		>	poivre
			pira		píra		>											33, 90, 213, 325, 350	phonét.	peire		>	poire		>	pwere
			°pirāriu	°	pirā́riu		>											241	phonét.	perier
			piscīna		piscī́na		>											140	phonét.	peissine
			pisciōne		pisciṓne		>											67.7, 140, 144, 283	phonét.	poisson
			pistrīnu		pistrī́nu		>											182	phonét.	pestrin
			°pistūrīre	°	pistūrī́re		>											244	phonét.	pestrir
			pisu		písu		>											331	phonét.	pois
			placeo		pláceo	1s	>											244, 255	phonét.	plaz
			°placere	°	plácere		>											112, 117.5	phonét.	plaire
			placēre		placḗre		>											97, 99, 100, 102, 104, 117.5, 138, 139, 139.3, 141, 141.1, 141.3, 149, 214	phonét.	plaisir
			placet		plácet	3s	>											67.7, 112	phonét.	plaist
			placitāre		placitā́re		>											117.8, 300	phonét.	plaidier
			placitu		plácitu		>											117.5, 117.8, 252.1	phonét.	plait
			°placūtu	°	placū́tu		>											240	phonét.	pleu
			plaga		plága		>											148, 323, 365	phonét.	plaie
			plāna		plā́na		>											325	phonét.	plaine
			°planca	°	plánca		>											105	phonét.	planche
			plangente		plangénte	part. prés.	>											69.3, 97.4, 131, 264.4	phonét.	plaignant
			plangere		plángere		>											97.4, 103.4, 116.3, 134, 175, 335.4, 349	phonét.	plaindre
			plantāgine		plantā́gine		>											117.5	phonét.	plantain
πλάσμα		>	plasma		plásma													259.6	phonét.
πλάτανοϛ		>	platanu		plátanu		>											237, 259, 297, 299	phonét.	plasne		>	plane
			°plegan	°	plegan		>											105	phonét.	plegier
			plenu		plénu		,	plena		pléna		>						333, 348, 215, 334, 367, 388	phonét.	plein																					plein		,	pleine
			plicō		plícō	1s	>											311	phonét.	plei
			plūma		plū́ma		>											222	phonét.	plume
			plumbu		plúmbu		>											97.4, 256, 264.4	phonét.	plom		,	plon
			pluvia		plúvia		>	°ploj.ja	°	plój.ja		>						123, 137, 146, 147, 148, 285.2	perte précoce de la labiale en coda	pluie
			podagra		pódagra		>											85.2	non populaire	poacre
			pollice		póllice		>											97.3, 112, 185, 259.4, 264.4, 273, 302, 373.1	variation	pouz		,	pols		,	polce		,	pous		,	pouce	,	polz
			polypu		pólypu		>											269.3	emprunt	polpe
			pōma		pṓma		>											220, 325	phonét.	pome
			ponere		pónere		>											185, 292	phonét.	pondre
			ponte		pónte		>											185, 231, 256	phonét.	pont
			popia		pópia		>											285	phonét.	poche
			populu		pópulu		,	poplu		póplu								225.1, 341, 341.2, 335.2, 335.4	phonét.	poblo	Serm	,	pueble		,	poble
			populus		pópulus		>											335.4
			porcellu		porcéllu		>											73, 97, 181, 354, 359	phonét.	pourceaux	pl	,	pourciaux	pl	,	porcel		,	pourcel		,	pourceau	,	porcelet
			porcu		pórcu		>											185, 313.2, 354, 356, 359, 374	phonét.	porc	sg	,	pors	pl
			porta		pórta		>											12, 170, 185, 232, 236, 264, 363, 383	phonét.	porte																					porte
			portāre		portā́re		>											188, 383	porter analogique	pourter																					pourter		,	porter
			portat		pórtat	3s	>											188	phonét.	porte
			porticu		pórticu		>											29.1, 67, 67.5, 258, 272, 272.1, 381	phonét.	porche																					porche
			porto		pórto	1s	>											254.2, 256.5	analogique	port
			°posseo	°	pósseo	1s	>											186	phonét.	puis
			postea		póstea		>											284, 401	phonét.	puis
			posteriōne		posteriṓne		>											140, 158.2, 348	chute précoce de l’atone prétonique	poitron																												‘cul’
			posterula		postérula		>											292	phonét.	posterle
			°potēre	°	potḗre		>											243.2, 317.3	variation	poeir		,	pooir		>	povoir
			pōtiōne		pōtiṓne		>											189, 284, 365	phonét.	poison
			praeda		práéda		>	°prēda	°	prḗda		>						204.1, 213.5, 351.1	ae > e cas minoritaire	proie
			praeferre		praeférre		>											319.3	phonét.	preferer
			praepositu		praepósitu		>											252.1	phonét.	prevost
			prātulu		prā́tulu	lc	>	°prātellu	°	prātéllu	acc sg	,	°prātellōs	°	prātéllōs	acc pl	>	181.1, 235.4, 240.1	variation	prael		,	preel		,	preaus	pl	,	praiaux	pl	,	praiel
			precāre		precā́re		>											206, 323	phonét.	preier	Eul 26	,	preiier
			precat		précat	3s	>											179	phonét.	prie
			precet		précet	3s subj	>											112	phonét.	prist
			prehendi		prehéndi	1s pf	>	°prēnsi	°	prḗnsi		>	°prīsi	°	prī́si		>	221.1	métaphonie (influence du i final sur la voyelle tonique)	pris
			premere		prémere		>											211.1, 250	analogique	priembre		>	preindre
			°presbitru	°	presbítru		>											85	phonét.	preveire	CR	>	provoire	CR
			presbyter		présbyter		>											85, 251	phonét.	prestre	CSs
			pretiu		prétiu		>											179	phonét.	pris
			prīmāriu		prīmā́riu		>											224.2, 227.1, 241	phonét.	premier
			prīncipe		prī́ncipe		>											191, 267.2, 270.3, 356, 371	perte de la dernière syllabe	prince																													prince
			prīvāre		prīvā́re		>											224.2	analogique	priver
			pro hoc		pro hóc		>											310, 327, 327.1	phonét.	poruec	tonique	,	pruec	tonique	,	poro	atone																					‘à cause de cela’
			proba		próba		>											74.2, 216	phonét.	prueve		>	preuve
			°proditia	°	prodítia		,	°prōditia	°	prōdítia		>						183.3, 283.6	proece savant, suffixe modifié	proeise		>	prooise		,	proece
			profānus		profā́nus		>											319.3	savant	profane
			profundu		profúndu		>											319.3	phonét.	profont
			prōmunturiu		prōmuntúriu		>											190	phonét.	promontoire
			prōmūtuāri		prōmūtuāri	lc	,	°imprūmūtuāre	°	imprūmūtuā́re		>						192.1	phonét.	emprunter
			propagine		propágine		>											117.6	phonét.	provain
			prope		própe		>											311	phonét.	pruef																												‘un (chiffre)’
			°propeānu	°	propeā́nu		,	°propeāna	°	propeā́na		>						207.2, 208.1	phonét.	prochien		>	prochain		,	prochaine
			Provincia		Província		>											319.5	phonét.	Proence
			proximu		próximu		>											67, 186.3, 291	phonét.	pruisme		,	proisme																									‘proche, prime (abord)’
			prūna		prū́na		>											333, 334, 348	phonét.	prune
			pugna		púgna		>											300	phonét.	poigne
			pugnu		púgnu		>											117.5, 291.5, 331, 356, 374	phonét.	poing	CRs, [ɲ]	,	poinz	CRp	,	poin
			pūlice		pū́lice		>											192.3, 259.4, 273, 302, 307	phonét.	pulce		>	puce
			°pullicella	°	pullicélla		>											273	phonét.	pucele
			pullicēnu		pullicḗnu		>											214.3, 221.6	phonét.	poucin
			pullipēde		pullipḗde		>											68.3, 269	substitution de sonante	pourpier		,	polpier		,	porpié
			pullitra		púllitra		,	pullitru		púllitru		>						85	phonét.	poutre
			pullitra		púllitra		>											371		poltre																												‘jeune jument’
			pulmōne		pulmṓne		>											190, 220.1	phonét.	poumon
			pulsu		púlsu		>											291.5, 373.1	phonét.	pouz		,	poulz		,	pols		,	polz
			pulvere		púlvere		>											165, 289.1, 289.3, 292, 324.4, 343	phonét.	poldre		>	poudre
			pūmice		pū́mice		>											259	phonét.	ponce
			punctiōne		punctiṓne		>											136, 284, 300.8	phonét.	poinçon
			punctu		púnctu		>											136, 190, 300, 367, 387	phonét.	point		,	puint																		point
			punctūra		punctū́ra		>											190	phonét.	pointure																												‘piqûre’
			pungere		púngere		>											349	phonét.	poindre
			pūrgāre		pūrgā́re		>											72, 105	phonét.	purgier		>	purger
			pūrgat		pū́rgat	3s	>											192	phonét.	purge
			pūtēre		pūtḗre	lc	>	°pūtīre	°	pūtī́re		>						224.2	analogique, refait	puir
			puteu		púteu		X	putte		putte	frk	>						165, 192.4, 284	puits, puiz croisement avec frk putte ou résultat de l'action de yod	pois		,	puiz		,	puits
			pūtidu		pū́tidu		,	pūtida		pū́tida		>						222, 224.2	phonét.	put		,	pute																									‘sale’
			°pūtināsiu	°	pūtinā́siu		>											224.2	analogique	punais																												‘fétide’
			°putritūra	°	putritū́ra		>											344	phonét.	porreure																												‘saumure’
			°pūttāne	°	pūttā́ne	°pūtta < pūtida + -āne	>											208.1	phonét.	putain	CRs
			quadrāria		quadrā́ria		>											174.2	obscur	carriere
			quadrātu		quadrā́tu		>											7, 33, 97.5, 296, 344	phonét.	carre
			°quadrellu	°	quadréllu		>											344	phonét.	carrel
			°quadrifurcu	°	quadrifúrcu		>											64.1, 231, 242, 250, 344	phonét.	carrefor		,	carrefour
			quadruviu		quadrúviu		>											285	phonét.	carroge																												‘carrefour’
			quaerere		quáérere		>											116.3, 221.3, 255.3, 292, 292.12	analogique ?	querre
			quāle		quā́le		>											206.4	variation	quel		,	qual	Pass 332
			quāre		quā́re		>											206.4	variation	quer		,	car
			quaternu		quatérnu		>											235.4, 365	variation	quaer		,	caer		,	quaier
			°quatordece	°	quatórdece		>											273.3, 381	phonét.	catorze																					quatorze
			quattuor		quáttuor		>											251, 289.7	phonét.	catre
			quem		quem		,	quam		quam		>						328.3	phonét.	que
			querēla		querḗla		>											97.5, 264	phonét.	querele
			querquēdula		querquḗdula		>	°cercēdula	°	cercḗdula		>						264.2, 345	phonét.	cercele		,	cercelle
			quid		quid		>	quid		quid	atone	>						310, 327, 327.1	phonét.	quet	atone
			quid		quid		>	quid		quíd	tonique	>						97.5, 310, 327, 327.1	phonét.	queit	Alex 131, 444, tonique	,	quei	tonique	>	quoi	tonique	,	coi	tonique
			quietāre		quietā́re		>											65.6	j épenthétique	quiter
			quiētu		quiḗtu		>											276.1	perte irrégulière et ancienne de yod (ou i)	coi
			°quīndece	°	quī́ndece		>											273.3	phonét.	quinze
			quīnque		quī́nque		>	°cīnque	°	cī́nque		>						191, 264, 264.2	phonét.	cinc		,	cinq
			quirītāre		quirītā́re		>											241.3	perte de la voyelle initiale dès le lt	crier
			quisques		quísques	quisque + s	>											264.7
			quod		quod		>											327	phonét.	qued		,	que
			rabia		rábia		>	rabja		rábja		>						10.2, 12, 66.4, 107, 150, 153, 173, 277, 280, 285, 298	phonét.	rage
			racēmu		racḗmu		>											214.3, 221.6	phonét.	raisin
			rādīce		rādī́ce		>											235.4	phonét.	raiz		,	rai
			rādīcīna		rādīcī́na		>											14, 273, 295, 299, 306	phonét.	racine
			radiu		rádiu		>											281	phonét.	rai																												‘rayon’
			rādula		rā́dula		>	°ragla	°	rágla		>						345	phonét.																						raille							‘racloir’
			ragere		rágere		>											98.1, 104.1, 113, 114, 114.1, 117.6, 139, 300, 334	phonét.	raire
			raia		ráia		,	raja		rája		>	°rajja	°	rájja		>	281.1, 119, 137, 147, 148	phonét.	raie
			°rāmiscellu	°	rāmiscéllu		>											158.5	phonét.	rameisel																												‘petite branche’
			?°rāmuscellu	?°	rāmuscéllu		>											158.5	étymologie impossible	raincel
			rāna		rā́na		>											208	phonét.	raine
			rancidu		ráncidu		>	rancede		rancede		>						270, 371	phonét.	rance
			rancōre		rancṓre		>											12, 264, 301, 300.1, 333	phonét.	rancor
			rānunculu		rānúnculu	lc	>	°rānucula	°	rānúcula		>						166.1, 235.3	chute erratique de n en coda	renoille		,	grenouille
			raphanu		ráphanu		>											13, 298.1, 315, 319, 319.2, 333, 333.2	demi-savant	ravene																												‘radis’
			rapidu		rápidu		>											259, 270, 270.1	phonét.	rade
			rāsōriu		rāsṓriu		>											189	phonét.	rasoir
			rastellu		rastéllu		>											181	variation	rastel		,	rasteaux	pl	,	rastiaux	pl
			rationābile		rationā́bile		>											299	phonét.	raisnable
			ratiōne		ratiṓne		>											30, 115.1, 139, 139.3, 141.2, 149, 276, 277, 282, 284, 290, 299, 378	phonét.	raison																					rairon		,	raison
			°raubôn	°	raubôn	g	>	°raubāre	°	raubā́re		>						246	phonét.	rober
			raucu		ráúcu		>											223.5	phonét.	ro		,	rou		,	enroer	‘rauque’		roer	‘rauque’
			°raustjan	°	raustjan	g	>											221.3	phonét.	rostir
			recāmente		recāménte		>											236.1	analogique																						recentement
			recipere		recípere		>											214.4	reciwre ph, le reste refait	reciwre	Lég 57	,	receivre		,	reçoivre
			°recipēre	°	recipḗre		>											49, 350.3	phonét.	recevoir		>	recever	13e
			recipiō		recípiō	1s	>	°recipo	°	recípo		>						214.4	refait	receif		,	reçoif
			°recipūtu	°	recipū́tu	part	>											319	variation	receu
			reddere		réddere		>											335.1a
			redemptiōne		redemptiṓne		>											284	phonét.	raençon
			refugiu		refúgiu		>											281, 288	emprunt au latin	refui		,	refugie		,	refuige		,	refuge
			rēge		rḗge		>											12, 98, 98.2, 148, 350, 365, 367	phonét.	rei		>	roi		>	rwe
			rēgīna		rēgī́na		>											97, 98, 367	phonét.	reine
			regiōne		regiṓne		>											122, 137, 148, 183, 276, 280, 281, 281.2, 288	phonét., region emprunt	reion		,	roion		,	reon		,	region	[ʒj]
			rēgula		rḗgula		,	°regula	°	régula		>						212.4, 346	rieule abrègement de ē, riule picard	reille	< rēgula	,	rieule	< °regula	,	riule	< °regula
			rēgulāre		rēgulā́re		>											300	phonét.	reillier																												‘verrouiller’
			rem		rém		>											13, 13.5, 211, 307, 307.2, 310, 328.3, 367	phonét.	rien		,	riens		,	reans
			Rēmis		Rḗmis		>											215	phonét.	Reims
			renegat		renégat	3s	>											369
			repatriāre		repatriā́re		>											174.1, 284	phonét.	repairier																												‘retourner’
			reperio		repério		>											237
			reputu		réputu		>											249, 252.1, 256	phonét.	ret																												‘accusation’
			respectāre		respectā́re		>											183.1	respitier analogique	respoitier		,	respitier																									‘mettre un délai’
			respectu		respéctu		>											179	phonét.	respit
			°rēticellu	°	rēticéllu		>											273	phonét.	resel
			°retina	°	rétina		>											14.1, 176, 291, 295.1, 299, 303.2, 344.1	phonét.	resne		>	rene
			°rētiolu	°	rētiólu		>											183	phonét.	reiseul																												‘petit filet’
			retractāre		retractā́re		>											174, 174.1	phonét.	retraitier																												‘révoquer’
			Rhodanu		Rhódanu		>											237, 259, 288.2, 299	phonét.	Rosne
			rīca		rī́ca		>											323	phonét.	reie
			°rīdere	°	rī́dere		>											344	phonét.	rire
			rigidu		rígidu	masc	,	rigida		rígida	fém	>						113, 114, 256, 295, 300, 350.3	phonét.	roit	masc.	,	roide	fém.																	raide
			rīki		rīki	frk	>											105.2, 254.1, 286	variation	rice	Alex	,	riche
			°rīki+-itia	°	rīki+-ítia	g	>											183.3	phonét.	richeise		,	richoise
			rīpa		rī́pa		>											10, 13, 221, 224.2, 308, 315, 319, 333, 333.2	phonét.	rive
			rīpāria		rīpā́ria		>											174.2, 224.2	analogique	riviere
			rīvu		rī́vu		>											318	variation	riu
			°rīvuscellu	°	rīvuscéllu		>											158.5	phonét.	ruisel
			°rōbiculu	°	rōbículu		,	°rōbīcula	°	rōbī́cula		>						243.2, 319	variation	roille		,	roil
			rōbur		rṓbur	neutre	>											251	phonét.	rouvre
			rogāre		rogā́re		>											317.3, 322	phonét.	rover																												‘demander’
			rogat		rógat	3s	>											317.3	phonét.	rueve																												‘(il) demande’
			Rolf		Rolf	frk	>											264.4	phonét.	Rou
			rōmānice		rōmā́nice		>											112, 243.1, 256, 273	phonét.	romanz		,	roumanz		,	romans
			rōmānu		rōmā́nu		>											243.1	phonét.	romain		,	roumain
			rosa		rósa		>											64.1	phonét.	rose
			rota		róta		>											204.1	roue analogique	reue
			rotāre		rotā́re		>											243.2	phonét.	roer		,	rouer
			rotella		rotélla		>											204.1, 243.2	phonét.	roele		,	rouele		,	rouelle
			°roticulāre	°	roticulā́re		>											158	phonét.	roeillier																												‘aplatir (rouler)’
			Rotomagu		Rotómagu	celt	>											217.1, 246.5, 272	phonét.	Rodomo	attesté 8e siècle	>	Rouem		,	Roem		,	Ruem
			°rotulāre	°	rotulā́re		>											345	phonét.	roller
			rotulu		rótulu		>											14, 93, 255.1, 295, 296, 299, 306, 334, 339, 345	phonét.	rolle
			°rotundiāre	°	rotundiā́re		>											188, 245, 245.2, 281	phonét.	rooignier		,	reoignier		,	redoignier
			rotundu		rotúndu		,	rotunda		rotúnda		>						245, 384.iii, 389	phonét.	roont	masc.	,	reont	masc.																	ronde	fém.	,	reonde	fém.	,	rond
			rubeu		rúbeu		>											123, 252.1, 285, 298	phonét.	rouge
			rubōre		rubṓre		>											319.4	emprunt (au latin)	rovor		,	roveur		,	roor																						‘rougeur’
			rucina		rúcina		>											67, 112	phonét.	roisne
			rūga		rū́ga		>											204.1, 222, 317, 321, 322	phonét.	rue	plante
			rūgitu		rū́gitu		>											192.5	variation	ruit
			rumice		rúmice		>											228, 259, 259.4, 295, 307, 307.2	phonét.	ronce
			°rūmigāre	°	rūmigā́re		>											271	phonét.	rongier
			rumpere		rúmpere		>											28, 29, 67, 301, 334, 348	phonét.	rompre
			rupta		rúpta		>											10, 14, 28, 293.1, 295, 297, 298, 333	phonét.	route
			°rūsca	°	rū́sca	celt	>											192	phonét.	ruche
			rūsticu		rū́sticu		>											272.6, 272.7	phonét.	rustie		,	ruiste		,	ruste																						‘rude, violent’
			rutābulu		rutā́bulu		>											243.2	phonét.	roable		,	rouable
			sabūcu		sabū́cu		>											240, 319	variation	seu
			sabulōne		sabulṓne		>											340.3	variation	savelon		,	sablon
			saccus		sáccus		>											105.3	phonét.	sac
			sacrāmentu		sacrāméntu		>											236, 300, 300.6, 346, 361.iii, 370	phonét.	sagrament	Serm	,	sairement		,	sairment
			saeculu		sáéculu		>											346.2	savant	siecle
			sagitta		sagítta		>											97, 98, 148.3, 272.3	phonét.	saiete																												‘flèche’
			sagma		ságma		>											165.2, 223.1, 223.3, 300	phonét.	some
			sagmariu		sagmáriu		>											300	phonét.	somier
			salamandra		salamándra		>											348	phonét.	salemandre
			sale		sále		>											206, 310, 329	phonét.	sel
			°salha	°	salha	frk	>	°salla	°	sálla		>						345.5	obscur	saule
			salice		sálice		>											112, 259.4, 372	phonét.	salz		,	sals		>	saus
			salimūria		salimū́ria		>											192.5	variation	salmuire
			saltāre		saltā́re		>											175	phonét.	sauter
			saltu		sáltu		>											256	phonét.	salt		,	saut
			salvāre		salvā́re		>											175	phonét.	sauver
			salvia		sálvia		>											285	phonét.	sauge
			salvu		sálvu		>											256, 289.6	phonét.	salf		>	sauf
			sānāre		sānā́re		>											235.3	variation	saner		,	sener																									‘guérir’
			sancta		sáncta		>											67, 136, 137, 149, 168, 175, 300, 300.1, 389	phonét.	sainte																					sainte		,	saint
			sanctu		sánctu		>											256.2, 356, 373	phonét.	saint		,	sainz
			sangue		sángue		>											97.5, 356, 374	phonét.	sanc	sg	,	sans	pl
			sanguilentu		sanguiléntu		>											136.1, 349, 349.1	phonét.	sanglent
			sanguināre		sanguinā́re		>											136	phonét.	saignier
			sanguisūga		sanguisū́ga		>											136.1	phonét.	sansue		,	sainsue		,	sensue	TL9-161 : 4
			sānu		sā́nu		>											208	phonét.	sain
			sapere		sápere	lc	>	°sapēre	°	sapḗre		>						235, 350.3	phonét.	savoir		>	savar
			sapiam		sápiam	1s subj	>											285, 285.3	phonét.	sache
			sapidu		sápidu		>											288, 302, 307, 357, 383	emprunt au latin	savie		,	saive		,	sage															sage
			sapidu		sápidu		>											267.2	perte de la dernière syllabe	save																												‘dégoûtant’
			sapio		sápio	1s	>											123, 285.2	chute précoce de la labiale	sai
			sāpōne		sāpṓne		>											220.1	phonét.	savon
			sapōre		sapṓre		>											319	variation	savor
			°sapūtu	°	sapū́tu	part	>											222.3, 240, 317, 319, 319.9, 384.iii	phonét.	seu																					sceu
			sarcophagu		sarcóphagu		>											173.2, 218.2, 246.5, 272.2, 317, 319	variation	sarcou	Rol 2966	,	sarqueu	Alex 583
			sarculāre		sarculā́re		>											349	phonét.	sarcler
			sardonicu		sardónicu		>											272.6	phonét.	sardonie		>	sardoine																									‘type de pierre précieuse’
			sarpa		sárpa		>											173.2	variation	sarpe		,	serpe
			°satiāre	°	satiā́re		>											207	phonét.	saisier																												‘suffire’
			satiōne		satiṓne		>											174.1	variation suff. -tiōne, -siōne > -aison, -oison	saison
			satis		sátis		>											242	phonét.	sez		,	ses
			satullu		satúllu		>											235.4	phonét.	saol		,	saoul
			Sauconna		Saucónna		>	°Saconna	°	Sacónna		>						235.1, 235.4, 246.1	dissimilation	Saône
			°sazjan	°	sazjan	vha	>											221.3	phonét.	saisir
			scamnu		scámnu		>											256.2	variation	eschame																												‘tabouret’
			scandalu		scándalu		>											68, 250.1, 334, 348, 348.1, 371	substitution de sonante	escandre		,	escandle		,	escanle		,	escandele		,	escande	,	esclandre
			scapha		scápha		>											319.3	savant	eschafe																												‘chaloupe d’un grand navire’
			°scarab‑ot	°	scárab‑ot		>											269	phonét.	escharbot
σκίουρος		>	sciūru		sciū́ru		>											216.4	substitution -eul par -euil	escureul		,	escurueil
			scopulu		scopulu	lc	>	°scoclu	°	scóclu		>						187, 345.3	phonét.	escueil		,	escoil
			Scotia		Scótia		>											283.6	savant	Escoce
			scrībere		scrī́bere	lc	>	°escribere	°	escríbere	lt	>						30, 153.1, 182.1	phonét.	escrivre		,	escrire
			scrīptu		scrī́ptu		>											191	phonét.	escrit
			scrōfa		scrṓfa		>											319	variation	escroe
			scūtella		scūtélla		>											182.1, 354	phonét.	escuele
			sēbu		sḗbu		>	°sebu	°	sébu		>						202, 212.1, 212.4, 311, 318	phonét., siu d'origine picarde	sieu		,	siu
			secāre		secā́re		>											183.1	sier analogique	soier		,	sier
			secat		sécat	3s	>											183.1	phonét.	sie
			sēcūritāte		sēcūritā́te		>											158	phonét.	seurte
			sēcūru		sēcū́ru		>											11.1, 222, 317, 321, 322	phonét.	seur
			secūtu		secū́tu	cf. sēqui	>											222.1	phonét.	seut		,	seu																									‘suivi’
			°sēdece	°	sḗdece		>											273.3	phonét.	seze
			°sedicu	°	sédicu		>											66.3, 150, 210.1, 272, 272.1, 272,3, 287, 350	évolution retardée (diverses raisons)	siege
			sehan		sehan	vha	>											264.3	phonét.																													‘voir’	sehen
			sella		sélla		>											176	phonét.	selle
			sēmita		sḗmita		>											184, 242	phonét.	sente
			semper		sémper		>											251	phonét.	sempre																												‘aussitôt’
			seneciōne		seneciṓne		>											182, 182.2, 260.3	phonét.	seneçon
			senior		sénior		>	°seior	°	séior		>						251.2, 283.4	phonét.	sire	emploi proclitique
			senior		sénior		>											225.1, 251, 283.4	phonét.	sendra	CSs, Serm.																											‘seigneur’
			seniōre		seniṓre		>											182.2, 283.4	variation	seignor		,	signor
			seniōre		seniṓre		>											283.4	phonét.	sieur	emploi proclitique
			sensu		sénsu		>											180	phonét.	sens
			sentīmentu		sentīméntu		>											242.1	analogique	sentement
			sentīre		sentī́re		>											14, 184, 221.3, 242.1, 295, 301, 307	phonét.	sentir
			sēparat		sḗparat	3s	>	°sēperat	°	sḗperat		>						84.2	phonét.	seivre
			sēpe		sḗpe	lc	>	saepe		sáépe		>						213.5, 311	ae > e cas minoritaire	soif																												‘haie, clôture’
			sēperāre		sēperā́re		>											337.3a	variation	sevrer		,	severer	entrée TL
			sēpia		sḗpia		>											107, 182, 285, 298	phonét.	seche
			septe		sépte		>											176, 256	phonét.	set
			septembre		septémbre		>											182	phonét.	setembre
			septimāna		septimā́na		>											291	phonét.	semaine
			Sēquana		Sḗquana		>											237.2, 324.2	phonét.	Sekona		,	Segona		,	Seine
			sequere		séquere		>											289.1, 300, 323.3, 324, 324.4, 348	phonét.	sivre		,	sieure
			°sequit	°	séquit	3s	>											212.2, 323.3	variation	sieut		,	siut
			sērēnu		sērḗnu		>											215	phonét.	serein
			sērica		sḗrica		>											182.5	variation	serge		,	sarge
			serpente		serpénte		>											12	phonét.	serpent
			sēru		sḗru		>											213, 350	phonét.	seir		>	soir		>	swer
			serviente		serviénte		>											66, 67, 278, 278.1, 280, 285	phonét.	serjant
			servīre		servī́re		>											12, 289, 356	phonét.	servir
			servit		sérvit	3s	>											67, 289.1, 356, 373, 374	phonét.	sert		,	serft
			servitiu		servítiu		>											283.6	savant	service
			servu		sérvu		>											176, 356, 372, 374	phonét.	serf	sg	,	sers	pl
			sēta		sḗta	lc	>	saeta		sáéta		>						213.5	ae > e cas minoritaire	soie
			sex		séx		>											179, 291.4, 312.1, 380, 395	phonét.	six		,	sis																		six
			sextāriu		sextā́riu		>											179.5	phonét.	sestier
			sībilāre		sībilā́re		>											342.1	réaction contre vl	sifler
			siccu		síccu		,	sicca		sícca		>						255, 313.2, 354	phonét.	sec	masc.	,	seche	fém.
σίκερα hbr šekar		>	sīcera		sī́cera		>	°sisera	°	sísera		>						214.5, 292, 292.9	phonét.	sistre		,	citre		,	sizre		,	cidre
			°sigellu	°	sigéllu		>											98	phonét.	saiel		,	seel
			significāre		significā́re		>											182.7	phonét.	senechier		,	senefiier																									‘présager’
			signu		sígnu		>											134, 149	phonét.	sein		,	seing
			silvāticu		silvā́ticu		>	°salvaticu	°	salváticu		>						182.5, 241.1, 272, 272.1, 289	phonét.	salvage		>	sauvage
			similāre		similā́re		>											292	phonét.	sembler
			sīmiu		sī́miu		>											191, 285, 290, 370	phonét.	singe
σίναπι (iāi)		>	sināpi		sinā́pi	lc	>	°sinapi	°	sínapi		>						237, 259, 267, 269	phonét., apophonét.onie	sanve		,	senve		,	seneve		,	senevre
			sine hoc		sine hóc		>											35, 310, 327	phonét.	senuec																												‘sans cela’
			°sines	°	sínes		>											291.5, 356, 374	phonét.	sanz		,	senz
			singulāre		singulā́re		>											206.8, 349, 351	en FC substitution de suffixe : ‑ier	sengler		,	cengler
			sinu		sínu		>											215	phonét.	sein
			°sirpiculāria	°	sirpiculā́ria		>											182.5	variation	serpeilliere		,	sarpilliere
σίσαρον	‘panais’	>	sīser		sī́ser		,	sīseris		sī́seris								237
			sit		sít	3s subj	>											35, 310, 327	phonét.	seit
			siti		síti		>											308, 311, 380	phonét.	seid		,	sei																		soif
			situla		sítula		>	°sicla	°	sícla		>						345	phonét.	seille																												‘seau’
			°skāk	°	skāk		>											105	phonét.	eschec
			skala		skala		>											105	phonét.	eschale
			°skapin	°	skapin	frk	>											105.1, 319.7	phonét.	eschevin		=	esk(i)evin	pic
			skarda		skarda	g	>											292.3	phonét.	Swerdes	12e siècle	,	Zwerdes	12e siècle	,	Squerdia	attesté 857
			°skarwahta	°	skarwahta	frk	>											289.2	phonét.	eschargaite
			skina		skina	frk	>											105, 107	phonét.	eschine
			skip		skip	frk	>											105.2, 106.1, 319.7	phonét.	esquiper		,	eschiper
			°skirpa	°	skirpa	g	>											182.5	variation	escherpe		,	escharpe
			°skiuhan	°	skiuhan	g	>											354		eschever
			°slag	°	slag	frk	>	°esclāgu	°	esclā́gu		>						292, 322.4	phonét.	esclo		,	esclou
			°slaitan	°	slaitan	frk	>											292	phonét.	esclater
			°slimb	°	slimb	frk	>											292	phonét.	esclem																												‘tordu’
			slingan		slingan	frk	>											292.2	phonét.	eslinguer
			°slītan	°	slītan	frk	>											292	phonét.	esclier																												‘briser’
			smaragdu		smáragdu		>											300	phonét.	esmeraude
σμάραγδοϛ		>	smaragdus		smarágdus													259.6	phonét.
σμίλαξ		>	smīlax		smī́lax													259.6	phonét.
			soceru		sóceru		>											112	phonét.	suire																												‘beau-père’
			sōlāmente		sṓlāménte		>											236.1	phonét.	solement		,	seulement
			soleo		sóleo	1s	>											187	phonét.	sueil		,	soil																									‘(j')ai coutume’
			soliculum		solículum		>	soliclum		solíclum		>						369
			solidāre		solidā́re		>											270, 295, 307	phonét.	solder		>	souder
			solidu		sólidu		>											185	phonét.	solt		,	sout
			°soliu	°	sóliu		>											187	phonét.	sueil		,	soil
			solūtu		solū́tu	cf. solvere	>											222.1	phonét.	solu
			solvere		sólvere		>											185, 289.1, 365	phonét.	soldre		>	soudre
			somniāre		somniā́re		>											190, 285, 291.3	variation	songier		,	soignier
			somniu		sómniu		>											291.3	phonét.	songe
			somnu		sómnu		>											166.2, 252.1, 256.2, 291.3	phonét.	son		,	som		,	some
			sonāre		sonā́re		>											217, 243.1	phonét.	soner		,	suner
			sonat		sónat	3s	>											217	analogique	sone
			sonu		sónu		>											217	phonét., analogique	suen
			sorōriu		sorṓriu		>											245, 287	évolution retardée (diverses raisons)	sororge		,	serorge																									‘beau-frère’
			sortiāriu		sortiā́riu		>											284	phonét.	sorcier
			spargere		spárgere		>											349	phonét.	espardre																												‘répandre’
			spargit		spárgit	3s	>											113.1	phonét.	espart																												‘(il) répand’
[truncated: 623 more rows]
[truncated: 16 more columns]

## Sheet: par étymons
étymon tonique soulignée	étymon astérisque	étymon tonique accent aigu sans astérisque	étymon attr.	grec	grec attr.	renvois	type chgt	AF1	AF1 attr.	.	AF2	AF2 attr.	.	AF3	AF3 attr.	.	AF4	AF4 attr.	.	AF5	.	AF6	.	AF7	.	AF8	.	AF9	MF 1	MF1 attr.	.	MF 2	MF2 attr.	.	MF3	Sé (AF ou MF)	germ. mod.	germ. mod. attr.	FC1	FC1 attr.	.	FC2	FC2 attr.	.	FC3	lang rom 1	lang rom 1 attr.	lang rom 2	lang rom 2 attr.
(Ceno)mannicum		(Ceno)mánnicum				272.6	phonét.	Maine																															Maine
(dies) dominica		(dies) domínica				271.5	variation	dimagne																															dimanche
°(ec)ce + °(il)lūi	°	(éc)ce + (il)lū́i				222.2	phonét.	celui																															celui
(ec)ce + ille		(ec)ce + ille				157.2	perte de la syllabe initiale	cil																															ce	démonstratif
(ec)ce + istu		(ec)ce + istu				157.2	perte de la syllabe initiale	cist																															ce	démonstratif
°(es)sere-at	°	(es)sere-át				157.2	perte de la syllabe initiale	sera																															(il) sera
°(g)līrōne	°	(g)līrṓne				224.2	(g)liron analogique	gliron		,	liron		,	gleron		,	leron																			‘lérot’
(il)la		(il)la				157.2	perte de la syllabe initiale	la																															la
(il)la hōra		(il)la hōra				219.4	phonét.	lores		,	lors		,	alors	a + lors																								lors		,	alors
(il)lu		(il)lu				157.2	perte de la syllabe initiale	le																															le
°(il)lūi	°	(il)lū́i	dat. illi croisé avec cūī datif de quī			222.2	phonét.	lui																															lui
(in)de-ūsque		(in)de-ū́sque				281, 287	évolution retardée (diverses raisons)	jusque		,	enjusque																												jusque
(nux) gallica		(nux) gállica				271.5	variation	gaille		,	jaille																									‘noix’
ab		áb				206.4	phonét.	a																															à
-ābas		-ā́bas	2s imp			206.3	-ais analogique	-eves		,	-oes		,	-oues																									-ais	idem le reste de cette conjugaison
abbāte		abbā́te				206	phonét.	abe																															abbé
abbreviāre		abbreviā́re				182, 285, 350.4	phonét.	abregier																															abréger
abellāna		abellā́na				182.2, 260.3	phonét.	avelaine																															aveline
abiēte		abiḗte				276.1	perte irrégulière et ancienne de yod (ou i)	avoi																												‘sapin’
°aboculo	°	abóculo				346.2	savant	avogle																															aveugle
abortāre		abortā́re				188	phonét.	avoulter		,	avorter																												avorter
abrotonu		abrótonu				337.3a, 343	variation	aurone		,	averoine	TL1-681 : 45 sq., REW 39																											aurone
absolvere		absólvere				292	phonét.	assoldre																															absoudre
°accaptāre	°	accaptā́re				173	phonét.	achater																															acheter
accognitu		accógnitu				134	phonét.	acointe																															accointe
°accommūnicāre	°	accommūnicā́re				190.1	phonét.	acomungier	Alex 52																											‘communier’
acerabulu		acerábulu				112	phonét.	airable																															érable
aciariu		aciáriu				100.1, 283, 350	phonét.	acier																															acier
acidula		acídula				292.11, 299, 339, 345	phonét.	oseille																															oseille
°acigla	°	acígla				292.11, 299, 339, 345	phonét.	oseille																															oseille
acinu		ácinu				67, 112, 259, 291, 300	phonét.	aisne																															aine
ācre		ā́cre				174.3, 179.3, 346.2	egre, aigre savants	aire		,	egre		,	aigre																						‘amer’			aigre
°ācru	°	ā́cru				174.3, 179.3, 346.2	egre, aigre savants	aire		,	egre		,	aigre																						‘amer’			aigre
āctus		ā́ctus				33
°acūcula	°	acū́cula				192	phonét.	aguille																															aiguille
ad		ad				13, 206.4, 306, 308, 308.1, 327, 354, 356	phonét.	aθ		,	ad		,	at		,	a																						à
°adaciāre	°	adaciā́re				173	phonét.	aacier																												‘agacer’
adaequāre		adaequā́re				324	phonét.	aiver																												‘associer’
adauctāre		adauctā́re				165	phonét.	aoitier																												‘augmenter’
°adaugere	°	adáúgere				117.6	phonét.	aoire																												‘multiplier’
adcrēscere		adcrḗscere				349	phonét.	acreistre																															accroître
adjūtāre		adjūtā́re				174, 350.4	phonét.	aidier																															aider
°admemorāre	°	admemorā́re				64.1, 158	phonét.	amembrer																												‘se souvenir’
admīrārī		admīrā́rī				299	phonét.	amirer																															admirer
°adoculāre	°	adoculā́re				235.4	phonét.	aouiller																															ouiller
adportāre		adportā́re				296	phonét.	aporter	StLég 200																														apporter
°adprenditīciu	°	adprenditī́ciu				158	phonét.	aprentiz																															apprenti
adpressu		adpréssu				176	phonét.	apres																															après
°adprīvātiāre	°	adprīvātiā́re				174.1	croisement avec vitiāre	apreveisier		,	aprevoisier																												apprivoiser
adpropiat		adprópiat	3s, attesté Vulgate (Versio Itala, 4e siècle)			170, 187.1	phonét.	aprueche		,	approche																												(il) approche
°adratiōnāre	°	adratiōnā́re				174, 174.1	phonét.	araisnier																															arraisonner
adrestāre		adrestā́re				344	phonét.	arrester																															arrêter
adretro		adrétro				85, 350	phonét.	ariere		,	arriere																												arrière
°adsatiōnāre	°	adsatiōnā́re				174.1	phonét.	assaisnier																															assaisonner
°adsatis	°	adsatis				299	phonét.	assez																															assez
adulterāre		adulterā́re				190	phonét.	avoutrer																												‘commettre un adultère’
adulteru		adúlteru				371		avoltre		,	avoutre		,	adultere																									adultère
advenīre		advenī́re				289, 299, 295, 306	advenir savant	avenir																															advenir
advocāre		advocā́re				299	phonét.	avoer																															avouer
advocō		advócō	1s			322	phonét.	aveu																															(j') avoue
aedificāre		aedificā́re				319.3	phonét.	aigier																															édifier
Aegidius		Aegídius				288	emprunt au latin	Gilies		,	Gires		,	Giles																									Gilles
aequāle		aequā́le				241.2, 324	dissimilation	ivel																												‘égal’
aequāre		aequā́re				324	phonét.	iver																												‘rendre égal’
aerāmen		aerā́men				241.1	variation	araim																															airain
aestimāre		aestimā́re				29.1, 30, 67, 242, 291	phonét.	esmer																															estimer
°aetāticu	°	aetā́ticu				261, 381	phonét.	eage																					âge										âge
°afannāre	°	afannā́re				319.3	phonét.	ahaner																															ahaner
affectiōne		affectiṓne				288	emprunt au latin	afection																															affection	[ksj]
°affībulāre	°	affībulā́re				248.1	analogique	afubler																															affubler
°affībulat	°	affī́bulat	3s			248.1	influence labiale	afuble																															(il) affuble
afflīgere		afflī́gere				191.3	phonét.	aflire																															affliger
agnellu		agnéllu				125, 131, 136, 149, 173, 291, 291.2, 300, 300.1	phonét.	agnel																															agneau
agru		ágru				300, 346	phonét.	aire																												‘nid (d'aigle)’
aguriu		agúriu	attesté en bas latin (TLFi)			158.3, 222.3, 235.1, 240, 246.1, 276.1, 384.iii	dissimilation	eur	[əyr]																				heur										heur
°agūru	°	agū́ru				158.3, 222.3, 235.1, 240, 246.1, 276.1, 384.iii	dissimilation	eur	[əyr]																				heur										heur
°agusta	°	agústa				235.1	dissimilation	Aoste																															Aoste
°agustu	°	agústu				193.1, 235.1, 235.4, 322	dissimilation	aost		,	aoust																												août	[ut]
-āi		-ā́i	1s pf, cf. °cantāi			206.1	phonét.	-ei	cf. chantei	,	-e	cf. chante																											-ai	[e]
āla		ā́la				206	phonét.	ele																															aile
alabastru		alabástru				260.1	phonét.	alebastre		>	aubastre																												albâtre
alabru		álabru				237	variation																													‘dévidoir’
alacre		álacre				179.3, 85.2	savant	alegre		,	halegre																												allègre
alacre		álacre				179.3, 85.2, 237	savant	aliegre		,	haliegre		,	aligre																									allègre
alacre		alácre				179.3, 85.2	savant	alegre		,	halegre																												allègre
Alamannia		Alamánnia				235, 236, 271.5	variation	Allemagne																															Allemagne
Alamannica		Alamánnica				235, 236, 271.5	variation	Allemagne																															Allemagne
alapa		álapa				269	phonét.	aube		,	auve																												aube	roue
alauda		aláúda				181.1	aloe																													‘alouette’
alauda + -ellos		aláúda + -éllos	acc pl			181.1	variation	aloel	‘alouette’	,	aloyaulx	pl																											aloyau
alauda + -ellu		aláúda + -éllu	acc sg			181.1	variation	aloel	‘alouette’	,	aloyaulx	pl																											aloyau
alausa		aláúsa				223	phonét.	alose																															alose
alba		álba				14, 175, 295, 298.3, 302, 307, 333, 365	phonét.	albe		>	aube																												aube
albūmen		albū́men				222.5	phonét.	aubun																												‘blanc d’œuf’
-āle		-ā́le				206.8	phonét.	-el		,	-er																												-el		,	-er
alebris		álebris				335.1a
°alecre	°	alécre				179.3, 85.2, 237	savant	aliegre		,	haliegre		,	aligre																									allègre
Alesia		Alésia				179	phonét.	Alise																															Alise
°alibānu	°	alibā́nu				267, 269	phonét.	aubain																															aubain
alibru		álibru				237	variation																													‘dévidoir’
°alisnō	°	alisnō	g			291	phonét.	alesne																															alêne
ālium		ā́lium				175.4, 255, 283	phonét.	ail		,	aux	pl	,	aulx	pl																								ail
allactāre		allactā́re				174.1, 207	phonét.	alaitier																															allaiter
alleviāre		alleviā́re				285	phonét.	alegier																															alléger
°alliam	°	álliam	1s subj			287	évolution retardée (diverses raisons)	alge		,	auge																												(que j') aille
alliu		álliu				175.4, 255, 283	phonét.	ail		,	aux	pl	,	aulx	pl																								ail
°almosina	°	almósina		ἐλεημοσύνη		182.5, 303.3	variation	almosne		=	almorne	pic																											aumône
alnu		álnu				175, 244, 259, 291, 370, 372.1	phonét.	alne		,	aune																												aune		,	aulne
°alōd	°	alōd	frk			311	phonét.	aluet		,	alué		,	aluef																									alleu
altāre		altā́re				206.8	phonét.	alter																															autel
alteru		álteru				67, 227.1, 250, 334, 348, 365	phonét.	altre		>	autre																												autre
°alterūi	°	alterū́i	alterī datif de alter croisé avec cūī datif de quī			222.2, 234	phonét.	autrui																															autrui
°altiāre	°	altiā́re				67, 139, 139.2, 284	phonét.	haucier																															hausser
altu		áltu				264.3	croisement																														hoch	nha [hōχ] ‘haut’	haut
alūmen		alū́men				222.5	phonét.	alun																															alun
alveu		álveu				67, 278.1, 285	phonét.	auge																															auge
amant		ámant	3p			264.4	phonét.	aiment																															(ils) aiment
amante		amánte				175, 235	phonét.	amant																															amant
amāre		amā́re				10, 13, 309, 325	phonét.	amer																															aimer
amāritate		amāritáte				206.7	phonét., amerte dérivation AF	amarte		,	amerte	amer+te																											amertume
amāritūdine		amāritū́dine				84.1	phonét.	amertume																															amertume
amāru		amā́ru				206, 206.7	phonét.	amer																															amer
amat		ámat	3s			208	phonét.	aime																															(il) aime
amāte		amā́te	2p impér.			206.1	-ez analogique	aimez																															aimez
amātis		amā́tis	2p			291.5, 299.4	phonét.	amez																															(vous) aimez
amātōre		amātṓre				219.5	phonét.	ameor		,	ameeur		,	ameur																						‘amant’
amāvi		amā́vi	1s pf			209.5	phonét.	aimai																															(j’) aimai
Ambrosiu		Ambrósiu				284	phonét.	Ambrois																															Ambroise
ambulāre		ambulā́re				334, 348	phonét.	ambler																															ambler
-āmente		-āménte				236.1	phonét.	-ement	[-əmã]																														-ement	[-əmã]
amīca		amī́ca				191, 204.1, 323, 389	phonét.	amie																					amie		,	ami							amie
°āmiciōne	°	āmiciṓne				182.2	phonét.	ameçon																															hameçon
°amīcitāte	°	amīcitā́te				112, 191, 206.7, 207	i probablement analogique	amistie																															amitié
amīcitia		amīcítia	lc			112, 191, 206.7, 207	i probablement analogique	amistie																															amitié
amīcu		amī́cu				221	phonét.	ami																															ami
amita		ámita				175	phonét.	ante																															tante
°amitāne	°	amitā́ne	amita + āne			208.1	phonét.	antain	CRs																											‘tante’
amōre		amṓre				219.5, 370, 371	dialectal	amor		,	amour		,	amur	Rol, Serm																								amour
ampla		ámpla				335.4
amplu		ámplu				348	phonét.	ample																															ample
-āmus		-ā́mus	1p			206.2	dialectal ?	-ons																															-ons
-āna		-ā́na				208.1	phonét.	-ε͂		,	-εn(ə)																												-ε͂		,	-εn(ə)
anate		ánate	lc			208.2, 237.5, 267.2	ane obscur	ane		,	aine																									‘canard’			bédane	‘bec d'ane’
anate		ánate				237	variation																													‘canard’
°anaticula	°	anatícula	lc			261	phonét.	aneille																															anille
°anatīcula	°	anatī́cula				261	phonét.	aneille																															anille
ancilla		ancílla				97, 139, 139.2	phonét.	ancele																												‘servante’
ancora		áncora				67, 101, 244, 301, 334, 349	phonét.	ancre																															ancre
Andecāvis		Andecā́vis				271.4	phonét.	Angiers																															Angers
Andecāvu		Andecā́vu				209, 271.4	phonét.	Anjou																															Anjou
angelu		ángelu				267.2, 371, 371.1	savant	angele	Psautier d'Oxford	,	ange		,	angle		,	angre																				angel	angl	ange
angulu		ángulu				349	phonét.	angle																															angle
angustia		angústia				12, 30, 67.7, 140, 144, 149, 264, 284, 333	phonét.	angoisse																															angoisse
anima		ánima				68.3, 291, 291.3, 371, 371.1, 388	substitution de sonante	arme		,	alme		,	ame		,	anemes	Psautier d'Oxford	,	aneme	,	anme							âme										âme
animālia		animā́lia				68.3	substitution de sonante	armaille		,	almaille																												animal
anite		ánite				237	variation																													‘canard’
anite		ánite				208.2, 237.5, 267.2	ane obscur	ane		,	aine																									‘canard’			bédane	‘bec d'ane’
°ankja	°	ankja	frk			286	phonét.	anche																															anche
annu		ánnu				291.4, 291.5, 356, 373, 374	phonét.	an	CRs	,	anz	CRp																											an
annuāle		annuā́le				59, 66, 289.7	emprunt au latin	anvel																												‘annuel’
-ant		-ant	3p			236.3	nasale sans réalité phonétique	-ent																															-ent	[-ə(t)]
antecessor		antecéssor	nom sg			251, 292, 329	phonét.	ancestre	CSs																														ancêtre
antecessōre		antecessṓre				158	phonét.	ancessor	CRs																														ancêtre
°antephona	°	antéphona				244, 298, 298.1	phonét.	antievre		,	antiene		,	antienne																									antienne
antiphona		antíphona				298.1	phonét.	antoine																															antienne
antiphona		antíphona				244, 298, 298.1	phonét.	antievre		,	antiene		,	antienne																									antienne
antīqua		antī́qua				324	phonét.	antive																												‘ancien’
°antius	°	ántius				175.2	obscur	ainz																												‘auparavant’
-ānu		-ā́nu				208.1	phonét.	-ε͂		,	-εn(ə)																												-ε͂		,	-εn(ə)
°anuāle	°	anuā́le				59, 66, 289.7	emprunt au latin	anvel																												‘annuel’
anxia		ánxia				136, 175, 284	phonét.	ainse		,	ainsse																									‘anxiété, inquiétude’
anxiōsu		anxiṓsu				136, 175	phonét.	ainsos																															anxieux
ape		ápe				13, 206, 308	phonét.	ef		,	e																									‘abeille’
apiariu		apiáriu				285	phonét.	achier																												‘rucher’
apiu		ápiu				298, 370	phonét.	ache																															ache
apostolicu		apostólicu				272.6	phonét.	apostolie		>	apostoile																												apôtre
apostolu		apóstolu				68, 371	savant	apostre		,	apostle																												apôtre
°appariculāre	°	appariculā́re				158.1	phonét.	apereillier		,	apareillier																									‘préparer’			appareiller
appellāre		appellā́re				182.2	phonét.	appeler																															appeler
applicāre		applicā́re				271.1	savant	aploiier																															appliquer
°appodiāre	°	appodiā́re				148, 189	phonét.	apoiier		,	apoier																												appuyer
apud		apud				327	phonét.	od		,	o																									‘avec’
apud		ápud				206.4	phonét.	a																															à
apud hoc		apud hóc				310, 327, 380	phonét.	avuec																					avec										avec
aqua		áqua				181.3, 206.9, 289, 300, 300.7, 300.8, 324, 324.3, 324 réf. bibl.2	variation	aigue		,	aive		,	eve		,	ewe		,	eaue	,	eau																	eau	AF eve cf. évier
aquariu		aquáriu				300, 324	phonét.	evier																															évier
aquila		áquila				174.3, 324.4	aigle savant	aille		,	aigle																												aigle
°aquilentu	°	aquiléntu				174.3	savant	aiglent		,	aiglentier		,	eglenter	Rol 114																								églantier	suff. -ier
arātru		arā́tru				344	phonét.	arere																															araire
arbitriu		arbítriu				67.6, 139, 183, 264.5, 284, 344	phonét.	arveire		>	arvoire																									‘illusion’
arbore		árbore				67, 173, 334, 348	phonét.	arbre																															arbre
arboriscellu		arboriscéllu				158.5, 183	phonét.	arbreisel		,	arbroisel																												arbrisseau
arca		árca				105	phonét.	arche																															arche
°arciōne	°	arciṓne				29.1, 278, 283	phonét.	arçon																															arçon
arcu		árcu				256, 313.2, 381	variation	arc																					arc										arc	[k]
arcuballista		arcuballísta				158, 269	phonét.	arbaleste																															arbalète
ardōre		ardṓre				12, 264, 333	phonét.	ardeur																															ardeur
Arduenna		Arduénna				289.7	phonét.	Ardennes																															Ardennes
-āre		-ā́re				206.8	phonét.	-el		,	-er																												-el		,	-er
-āre		-ā́re	inf, cf. cantāre			206.1, 380	phonét.	-er	cf. chanter																				-er	inf									-er	[e]
ārea		ā́rea				66, 121, 174.2	phonét.	aire																															aire
arēna		arḗna				215	phonét.	areine																															arène
Argentomagu		Argentómagu				246.5	phonét.	Argenton		,	Argentan																												Argenton		,	Argentan
argentu		argéntu				16, 97, 100, 104, 107, 173, 281	phonét.	argent																															argent
argilla		argílla				97	phonét.	argile																															argile
-āria		-ā́ria				174.2	obscur	-ier		,	-iere																												-ier		,	-ière
ariete		aríete				276.1	perte irrégulière et ancienne de yod (ou i)	aroi																												‘bélier’
-āriu		-ā́riu				174.2	obscur	-ier		,	-iere																												-ier		,	-ière
arma		árma				12, 291	phonét.	arme																															arme
armāriu		armā́riu				215.1	armoire non phonétique	armaire		,	armoire																												armoire
armātūra		armātū́ra				222.4, 236, 261	phonét.	armeure																															armure
arte‑ma(thema)tica		arte‑má(thema)tica				288	emprunt au latin									,	artimaire																			‘magie’
°artemisia	°	artemísia		ἀρτεμισία		67, 221.5, 284	phonét.	armoise		,	ermoise																												armoise
artemīsia		artemī́sia	lc	ἀρτεμισία		67, 221.5, 284	phonét.	armoise		,	ermoise																												armoise
-ārunt		-ā́runt	cf. °cantārunt			206.1	phonét.	-erent	cf. chanterent																														chantèrent	[ɛ]
°as	°	ás				206.4	analogique	as																															(tu) as
°-as	°	-ás				206.5	analogique	-as																															-as
ascia		áscia				140, 283	phonét.	aisse																															aissette
ascoltāre		ascoltā́re				190, 193.1, 235.1	dissimilation, formes en es- par substitution de préfixe	ascouter		,	escolter		,	escouter																									écouter
asinu		ásinu				175, 252.1, 259, 291, 295, 303.2, 303.3, 307	phonét.	asne		>	ane		=	arne	pic	=	adne	anglo-norm																					âne
asperu		ásperu				250, 348	phonét.	aspre																															âpre
°assopīre	°	assopī́re				319	variation	assovir																															assouvir
asthma		ásthma				67	phonét.	asme																															asthme
astracu		ástracu		ὄστρακον		246.5	phonét.	astre		,	atre																												âtre
°at	°	át				206.4	analogique	a																															(il) a
°-at	°	-át				206.5	analogique	-at																															-a
°atavia	°	atávia				148, 285.2	chute précoce de la labiale	taie																												‘grand-mère’
°ataviōne	°	ataviṓne				285.2	chute précoce de la labiale	taion																												‘grand-père’
-ātis		-ā́tis	cf. cantātis			206.1	phonét.	-ez	cf. chantez																														chantez	[e]
ātriu		ā́triu				67.6, 284	phonét.	aitre																															aître
-ātu		-ā́tu	part., cf. cantātu			206.1	phonét.	-e	cf. chante																														-é	[e]
auca		áúca				165.2, 223, 223.1	phonét.	oe		,	oue																												oie	anal. sur oiseau
aucellu		aucéllu				97, 99, 165.2, 193, 223.1, 315, 321, 351.1	phonét.	oisel																															oiseau
auctāre		auctā́re				193	phonét.	oitier																												‘accroître’
auctorāre		auctorā́re	lc			193, 271.1	phonét.	otroiier																															octroyer
°auctōridiāre	°	auctōridiā́re				193, 271.1	phonét.	otroiier																															octroyer
audientia		audiéntia				288	emprunt au latin	audience																															audience	[dj]
audirat		audirát	3s fut			344	phonét.	orra																															(il) ouïra
audīre		audī́re				247, 320	phonét.	audir		,	oir		,	ouir																									ouïr
audis		áúdis	2s			291.5	phonét.	oz																															(tu) ois
auguriu		augúriu				158.3, 222.3, 235.1, 240, 246.1, 276.1, 384.iii	dissimilation	eur	[əyr]																				heur										heur
Augusta		Augústa				235.1	dissimilation	Aoste																															Aoste
augustu		augústu	lc			193.1, 235.1, 235.4, 322	dissimilation	aost		,	aoust																												août	[ut]
°aurāticu	°	aurā́ticu				246	phonét.	orage																															orage
auricula		aurícula				244, 246, 346.1	phonét.	oreille																															oreille
auru		áúru				223, 359	phonét.	or																															or	métal
ausāre		ausā́re				246, 246.2, 359	phonét.	oser																															oser	[o]
auscultāre		auscultā́re				190, 193.1, 235.1	dissimilation, formes en es- par substitution de préfixe	ascouter		,	escolter		,	escouter																									écouter
°austrūcia	°	austrū́cia				193	phonét.	ostruce																															autruche
aut		aut				327	phonét.	o		,	ou																												ou
°auwa	°	áúwa				223, 223.4	phonét.	hoe		,	houe																												houe
avēna		avḗna				215.1	avoine non phonétique	aveine		,	avoine																												avoine
Aveniōne		Aveniṓne				248.2, 260.3	phonét.	Avignon																															Avignon
avica		ávica	lc			165.2, 223, 223.1	phonét.	oe		,	oue																												oie	anal. sur oiseau
avicellu		avicéllu	lc			97, 99, 165.2, 193, 223.1, 315, 321, 351.1	phonét.	oisel																															oiseau
°aviolu	°	avíolu				148, 216.4, 285, 285.2, 365	chute précoce de la labiale	aiuel		,	aoel		,	aioel																									aïeul
-āvit		-ā́vit	3s pf			206.6	-a analogique	-aut		,	-ait		,	-at																									-a							cantó	it	cantó	esp
avunculu		avúnculu				319, 349	phonét.	oncle																															oncle
avus		ávus				148, 216.4, 285, 285.2, 365	chute précoce de la labiale	aiuel		,	aoel		,	aioel																									aïeul
°awunt	°	áwunt				209.3, 244.1	chute précoce de la consonne intervocalique	ont																															(ils) ont
axe		áxe				256	phonét.	ais																															ais
axīle		axī́le				191.1	phonét.	aissil																												‘bout de planche mince’
axīles		axī́les	pl			191.1	essieu emprunt au picard	axis	Renart	>																			aisils		,	aisis							essieu
bāca		bā́ca				148, 323, 323.3	phonét.	baie																															baie
°baccīnu	°	baccī́nu				97, 139	phonét.	bacin																															bassin
Bagdad		Bágdad				165.2, 295, 300	phonét.	Baudas																															Bagdad
°Bajsera	°	Bájsera				300.5	phonét.	Baisdra	en 588
bajulāre		bajulā́re				119	phonét.	baillier																															bailler
bālāre		bālā́re				235.3	variation	baler		,	beler																												bêler
baleāricu		baleā́ricu				272, 272.1	phonét.	baillarge																												‘orage de printemps’
ballāre		ballā́re				173	phonét.	baller																															baller
balneāre		balneā́re				350	phonét.	baignier		>	baigner																												baigner
balneum		bálneum				134, 137, 368, 373	phonét.	bain		,	bainz	pl																											bain
balsama		bálsama				371		balseme		,	balsemu	Roman d'Alexandre																											baume
°baneu	°	báneu				134, 137, 368, 373	phonét.	bain		,	bainz	pl																											bain
°ban-legwa	°	ban-légwa				292.4	phonét.	banlieue																															banlieue
baptisma		baptísma				291	phonét.	batesme																															baptême
baptismum		baptísmum		βαπτισμόϛ		259.6	phonét.
baptismus		baptísmus		βαπτισμόϛ		259.6	phonét.
barba		bárba				302, 333	phonét.	barbe																															barbe
Barbara		Bárbara				237.4	maintien de la posttonique	Barbe																															Barbara
°baro	°	baro	g			220.1	phonét.	baron																															baron
°barōne	°	barṓne				220.1	phonét.	baron																															baron
bāsiāre		bāsiā́re				115.1, 139, 139.3, 141.2, 144.2, 149, 174, 207, 277, 284, 303, 313	phonét.	baisier																															baiser	[z]
basilica		basílica				271.5	variation	Bazeille																															Bazeille
°bassiāre	°	bassiā́re				23, 115.1, 140, 144, 144.2, 207, 284, 284.5, 303	phonét.	baissier																															baisser
batāclāre		batāclā́re	attesté TLFi			173, 235.4	phonét.	baaillier																															bâiller
batāculāre		batāculā́re				173, 235.4	phonét.	baaillier																															bâiller
°batāre	°	batā́re				128, 235.4, 240.1	beer analogique	baer		,	bayer		,	beer																									béer		,	bayer
battuālia		battuā́lia				67.3, 289.7	processus lt	bataille																															bataille
°bawa	°	bawa	celt			223.4	gémination de w	boe		,	boue																												boue
Baxera		Báxera	nom propre			300.5	phonét.	Baisdra	en 588
beccu		béccu				313.2	phonét.	bec																															bec
°bedu	°	bédu	celt			311	phonét.	bied		,	biez		,	bies																									bief
Belena		Bélena				181	variation																																Beaune
bella		bélla				345.5	phonét.	bele																															belle
bellōs		béllōs	acc pl			127, 181, 307.3	variation	bel		,	beaux	pl	,	biaux	pl		biaus	pl																					beau		,	bel
bellu		béllu	acc sg			127, 181, 307.3	variation	bel		,	beaux	pl	,	biaux	pl		biaus	pl																					beau		,	bel
bene		béne				12, 211, 264, 285.1, 379, 401	phonét.	bien																					bien										bien
°benedicere	°	benedícere				30.2, 112.2	savant	beneistre																												‘bénir’
benedīcere		benedī́cere				30.2, 112.2	savant	beneistre																												‘bénir’
benedīcere		benedī́cere				270.5	phonét.	beneir																															bénir
beneficiu		benefíciu				319.2	demi-savant	benevis																												‘bienfait’
°bera	°	béra	g			210	phonét.	biere																															bière
°berbēcīle	°	berbēcī́le	REW 9268			273, 273.2, 273.3	phonét.	berzil		,	bercil																									‘bercail’, cf. Bercy
°berbīce	°	berbī́ce				112, 275.2, 289.5, 358	irrégulier	berbiz		,	berbis		>	brebis																									brebis
Bernhard		Bernhard	frk			264.4	phonét.	Bernard																															Bernard
°beroue + -ette	°	beroue + -ette				260.1	phonét.	beroete		>	brouete																												brouette
°bertiu	°	bértiu	celt ?			177	phonét.	biers		,	bers																												berceau
°beslīquāre	°	beslī́quā́re				324	phonét.	besliver																												‘courir de biais’
besta		bésta				303	phonét.	beste																													beast	angl	bête
bestia		béstia				140, 179	phonét.	bisse																															bisse		,	biche
bibente		bibénte	part			248.1	influence labiale ou analogique	bevant		>	buvant																												buvant
bibere		bíbere				334, 339, 340, 350	phonét.	boivre		,	bwere																												boire
bibitu		bíbitu	lc, cf. bibere			222.1	phonét.	fourbeu	cf. forboire ‘boire avec excès’																														fourbu
bibō		bíbō	1s			254, 306, 311, 375	phonét.	beif		,	boif																												(je) bois
°bibūtu	°	bibū́tu	part			222.1, 248.1	phonét.	beu		,	bu																												bu
°bilancia	°	biláncia				241.1	variation	balance																															balance
bilanx		bílanx	lc			241.1	variation	balance																															balance
°birota	°	biróta				260.1	phonét.	beroete		>	brouete																												brouette
bisaccia		bisáccia				283	phonét.	besace																															besace
Biturigas		Bitúrigas	celt			271	phonét.																																Bé(d)orges
°blād	°	blād	frk			320, 348	phonét.	emblaer																															emblaver
°blād	°	blād	frk			206	phonét.	blet		,	ble																												blé
blaesu		bláésu				213.5	ae > e cas minoritaire	blois																												‘bègue’
blao		blao	g			209.4	bleu obscur	blo		,	blou																												bleu
°blastēmāre	°	blastēmā́re				67, 242, 303, 333, 334, 348	phonét.	blasmer																															blâmer
°blastemiāre	°	blastemiā́re				285	phonét.	blastengier																												‘blâmer’
°blauƀ	°	blauƀ	g			246.3, 247	phonét.	esbloir		,	esblouir		,	esbloer		,	esblouer																						éblouir
Blavia		Blávia				285.2	chute précoce de la labiale	Blaye	Gironde																														Blaye	Gironde
blāvu		blā́vu				209.4	bleu obscur	blo		,	blou																												bleu
°blettiāre	°	blettiā́re				119.2, 284	phonét.	blecier																															blesser
°blettjan	°	blettjan	frk			119.2, 284	phonét.	blecier																															blesser
°bocla	°	bócla				345	phonét.	bueille		,	buille																									‘entrailles’
°bodina	°	bódina	celt			299, 303.3, 381	emprunt au pic	bosne		=	borne	pic																	borne										borne
°boltjōne	°	boltjṓne				286	phonét.																																boujon
bona		bóna				217, 301.1, 367, 368	phonét., analogique	buona	Eul 1	,	buen		,	buene		,	bun		,	bon	,	bonne							bon		,	bun		,	bonne				bon	méridional [bɔŋ]	,	bonne
Bonifatiu		Bonifátiu				283.6	savant	Boniface																															Boniface
bonitāte		bonitā́te				206.7	phonét.	bonte																															bonté
bonu		bónu				217, 301.1, 367, 368	phonét., analogique	buona	Eul 1	,	buen		,	buene		,	bun		,	bon	,	bonne							bon		,	bun		,	bonne				bon	méridional [bɔŋ]	,	bonne
°borniu	°	bórniu				283, 381	phonét.	borgne																					borgne										borgne
°boscu	°	bóscu				264.7	phonét.	bois																															bois
°bosk-	°	bosk-	g			264.7	phonét.	bois																															bois
bostia		bóstia	celt			284	phonét.	boisse																															boisseau
botellōs		botéllōs	acc pl			181.1, 243.2	variation	boel		,	boiel		,	bouiaus	pl	,	boyaux	pl																					boyau
botellu		botéllu	acc sg			181.1, 243.2	variation	boel		,	boiel		,	bouiaus	pl	,	boyaux	pl																					boyau
botulu		bótulu				345	phonét.	bueille		,	buille																									‘entrailles’
bovāriu		bovā́riu				319	variation	bovier																															bouvier
bove		bóve				13, 35, 216, 308, 365	phonét.	buef		,	buof																												bœuf
brachiu		bráchiu				283, 333, 334, 348	phonét.	braz		,	bras																												bras
braciāre		braciā́re				283	phonét.	bracier																															brasser
°bragu	°	brágu	celt			318.2	phonét.	brai		,	brau																									‘boue, fange’
°breka	°	breka	frk			105, 105.5, 296.3	phonét.	breche																															brèche
°brekan	°	brekan	frk			105.2	phonét.	broiier																															broyer
brevi		brévi				350	phonét.	brief			bref																												bref
Brivoduru		Brivóduru				344.4	variation	Briare	Loiret	,	Briarres	Essonne																											Briare	Loiret	,	Briarres	Essonne
°brodiculāre	°	brodiculā́re				243.2	variation	broeillier		,	brooillier																												brouiller
brogilos		brogilos	celt			187, 334, 346	variation	brueil	entrée TL	,	bruil	entrée TL	,	broil	entrée TL																								breuil
brogilu		brógilu				187, 334, 346	variation	brueil	entrée TL	,	bruil	entrée TL	,	broil	entrée TL																								breuil
°brunnja	°	brunnja	frk			283	phonét.	broigne																															besogne
°brūnu	°	brū́nu	g			222	phonét.	brun																															brun		,	brune
°brustulāre	°	brustulā́re				303.2	phonét.	brudler	anglo-norm																														brûler
bubalu		búbalu				342.1	réaction contre vl	bufle		,	bouffle																												buffle
°būcāre	°	būcā́re				322.4	phonét.	buer																															cf. buée
bucca		búcca				188	phonét.	boche		,	bouche																												bouche
°bucco	°	bucco	celt			105.3	phonét.	boc		,	boquet		,	bochier	dér., ‘petit bouc’	,	bochet	dér., ‘boucher’																					bouc
buccula		búccula				349	phonét.	boucle																															boucle
bucculāre		bucculā́re				206.8	substitution de suffixe : ‑ier	bucler																															bouclier
būgula		bū́gula				346.2	savant	bugle	plante																														bugle	plante
°būkōn	°	būkōn	frk			322.4	phonét.	buer																															cf. buée
bulgaru		búlgaru				334, 349	phonét.	bougre																															bougre
bulla		búlla				296.5	phonét.	bole																															boule
°bultjo	°	bultjo	frk			286	phonét.																																boujon
burdōne		burdṓne				73, 188	phonét.	bordon		,	bourdon																												bourdon
burgēnse		burgḗnse				214.1	substitution de suffixe	bourgeois																															bourgeois
Burgundia		Burgúndia				281	phonét.																																Bourgogne
burriōne		burriṓne				139, 150, 278.2, 284, 284.5	phonét.	borjon																															bourgeon
°būtyrāre	°	būtyrā́re				344	phonét.	burrer																															beurrer
būtyru		bū́tyru				334, 363.2	phonét.	bure																															beurre
caballāriu		caballā́riu				174.2	obscur	chevalier																															chevalier
caballicāre		caballicā́re				175	phonét.	chevaucher																															chevaucher
caballicet		cabállicet	3s subj			67.7	phonét.	chevauzt																															(qu’il) chevauche
caballōs		cabállōs	acc. pl			307, 310.1	phonét.	chevals		>	chevaus																												chevaux
caballu		cabállu				105.1, 173, 232, 238, 239, 244, 255, 291.4, 307, 310.1, 331, 384.iv	phonét.	cheval		=	keval	pic																	cheval										cheval
cacat		cácat	3s			207.1a	phonét.	chie																															(il) chie
°cactīvu	°	cactī́vu				221.4, 313.2	phonét.	chaitif																					chétif										chétif
cadentia		cadéntia				180, 239.2	cheance analogique	chaance		,	cheance																												chance
caderat		caderát	3s fut			344	phonét.	cherra																															(il) choira
cadere		cádere	lc			239.2	cheoir analogique	chaoir		,	cheoir																												choir
°cadēre	°	cadḗre				239.2	cheoir analogique	chaoir		,	cheoir																												choir
°cadūta	°	cadū́ta				222.3, 239, 239.2, 240	phonét.	cheu																															chu
°cadūtu	°	cadū́tu	part			222.3, 239, 239.2, 240	phonét.	cheu																															chu
cæcu		cæcu				212, 212.4, 224.3, 311, 318	phonét.	cieu		,	ciu	< pic ?																								‘aveugle’			cf. cécité
cælu		cælu				97.1, 210, 307, 331	ae > ɛ cas général	ciel		=	chiel	pic																											ciel
caementu		caeméntu				241.2	dissimilation	ciment																															ciment
cæpa		cæpa				213.5, 214	ae > e cas minoritaire	cive																															cive
Caesar		Cáésar				97.2b	phonét.																														Kaiser	nha
Caesaris		Cáésaris				237	variation
Caeseris		Cáéseris				237	variation
calamellu		calaméllu				239, 248.1	influence labiale	chalemel																															chalumeau
calamu		cálamu		κάλαμοϛ		237, 259, 291	phonét., apophonét.onie	chaume																															chaume
calce		cálce				112, 256, 259.4, 373	phonét.	chals		,	chalz		>	chauz																									chaux
calceāre		calceāre				207, 283	phonét.	chaucier		,	chaussier																												chausser
calcitrāre		calcitrā́re				335.2
calda		cálda				175	phonét.	chaude																															chaude
caldāria		caldā́ria				174.2, 175	évolution suffixe obscure	chaudiere																															chaudière
calendāriu		calendā́riu				174.2	obscur	calendier																															calendrier
calēre		calḗre				239	phonét.	chaloir																															chaloir
calice		cálice				371		calice																															calice
calidu		cálidu				252.1, 256, 264.4, 370, 372	phonét.	chalt	Fragmentde Valenciennes	>	chaud																												chaud
calōre		calṓre				219.5, 239	phonét.	chaleur																															chaleur
calumnia		calúmnia				105.7, 190.1, , 239, 291.3	emprunt, chalenge obscur	chalonge		,	chalenge																												challenge		,	calomnie
calumniāre		calumniā́re				190.1, 291.3	chalengier obscur	chalongier		,	chalengier																									‘accuser’			challenger
calva		cálva				289	phonét.	chauve																															chauve
calvu		cálvu				289.6	phonét.	chauf																															chauve
camara		cámara		καμάρα	‘voûte’	12.3, 59, 93, 105.1, 237, 292, 303.1	phonét.	chambre		=	cambre	pic																											chambre
cambiāre		cambiā́re				67, 175, 285	phonét.	changier																															changer
°cambiu	°	cámbiu				258	phonét.	change																															change
camellu		caméllu				239	phonét.	chamel																															chameau
camēlu		camḗlu				239	phonét.	chamoil																												‘chameau’
camera		cámera		καμάρα	‘voûte’	12.3, 59, 93, 105.1, 237, 292, 303.1	phonét.	chambre		=	cambre	pic																											chambre
Camerācu		Camerā́cu				318.2	phonét.	Chambray	Eure	,	Cambrai	Nord																											Chambray	Eure	,	Cambrai	Nord
Camerācum		Camerā́cum				292	phonét.																																Cambrai
camīnāta		camīnā́ta				239	phonét.	cheminee																															cheminée
°camīnu	°	camī́nu				239	phonét.	chemin																															chemin
camīsia		camī́sia				191, 239	phonét.	chemise																															chemise
°camoria	°	camória				287	évolution retardée (diverses raisons)	chamorge																												‘morve’
°camōria	°	camṓria				239	phonét.	chamoire																												‘morve de cheval’
campānia		campā́nia				175	phonét.	champagne																															Champagne	région
campānia		campā́nia				361.i		champignuel																															champignon
campu		cámpu				105.7, 175, 256, 264.4, 356, 372, 374	phonét.	champ	sg	,	chans	pl																											champ
canāle		canā́le				206.8	substitution de suffixe : savant ‑al	chenel																															chenal
canāle		canā́le				239	phonét.	chanel																															canal
°canape	°	cánape		κάνναϐιϛ		237, 259, 269	phonét., apophonét.onie	chanve		,	chanvre																												chanvre
°canapu	°	cánapu		κάνναϐιϛ		237, 259, 269	phonét., apophonét.onie	chanve		,	chanvre																												chanvre
°canapūtiu	°	canapū́tiu				192.5, 239	variation	chanevuis		,	chenevis																												chènevis
cancellāriu		cancellā́riu				182.2, 242.4	phonét.	chancelier																															chancelier
canceru		cánceru				112, 116.3, 139.2, 242.4, 349.2	variation	chaintre		,	chancre																												chancre
cane		cáne				207.2, 379	maintien irrégulier du yod	chien																					chien										chien
canīcula		canī́cula				236, 239	phonét.	chenille																															chenille
°canīle	°	canī́le				239	phonét.	chenil																															chenil
cannabim		cánnabim	lc	κάνναϐιϛ		237, 259, 269	phonét., apophonét.onie	chanve		,	chanvre																												chanvre
°cannabula	°	cannábula				54, 239, 343	phonét.	chanole		,	chenole																									‘nuque, trachée’
canonicu		canónicu				239, 272.6, 288	phonét.	chenoine		,	chanonie		>	chanoine																									chanoine
cantāmus		cantā́mus	1p			292.8	variation (graphique)	chantomps																															(nous) chantons
cantant		cántant	3p			159.1, 236	phonét.	chantent																															(ils) chantent
cantāre		cantā́re				12, 105.1, 264, 266	phonét.	chanter		=	canter	pic																											chanter
cantat		cántat	3s			236	phonét.	chante																															(il) chante
cantātōre		cantātṓre				175, 219.5	phonét.	chanteor		,	chanteur																												chanteur
cantāvi		cantā́vi	1s pf			224.3, 234	phonét.	chantai																															(je) chantai
canticu		cánticu				371		cantique																															cantique
Cantiliācu		Cantiliā́cu				207.1c	phonét.	Chantilly																															Chantilly
cantiōne		cantiṓne				97.1, 139, 139.2, 142, 144.1, 148.4, 284	phonét.	chançon		=	canchon	pic																											chanson
cantor		cántor	nom sg			251, 329	phonét.	chantre	CSs																														chantre
capillātūra		capillātū́ra				236	phonét.	cheveleure																															chevelure
capillos		capíllos				184	phonét.	cheveus																															cheveux
capillu		capíllu				239, 296.5, 307.3	analogique	chevel																															cheveu
capistru		capístru				140, 182, 239, 319	phonét.	chevestre																															chevêtre
capitāle		capitā́le				173	phonét.	chatel																															cheptel
capitaneu		capitáneu				270	phonét.	chadaine		,	chataigne																									‘capitaine’
capitāneu		capitā́neu				105.7	emprunt	chevetaigne																															capitaine
capitellu		capitéllu				266, 267, 270, 270.1	variation	chadel		,	chael																									‘chef (militaire)’
°capitine	°	capítine				299	phonét.	chevesne																															chevesne
capitiu		capítiu				239, 283.6	savant	chevez		,	chavez																												chevet
capitulu		capítulu				65.2, 68.2, 345.4, 371	substitution de sonante	chapitre		,	chapitle		,	chapitele																									chapitre
cappa		cáppa				105.7, 296	phonét.	chape																															chape
cappellōs		cappéllōs	acc pl			127, 137, 181	variation	chapel	sg	,	chapeaux	pl	,	chapiaux	pl																								chapeau		,	chapeaux
cappellu		cappéllu	acc sg			127, 137, 181	variation	chapel	sg	,	chapeaux	pl	,	chapiaux	pl																								chapeau		,	chapeaux
capra		cápra				105.1, 333, 334, 340	phonét.	chievre		=	kievre	pic																											chèvre
capreolu		capréolu				216.4, 276.1	perte irrégulière et ancienne de yod (ou i)	chevruel		,	chevreul																												chevreuil	substitution -eul par -euil
°caprjolu	°	caprjólu				216.4, 276.1	perte irrégulière et ancienne de yod (ou i)	chevruel		,	chevreul																												chevreuil	substitution -eul par -euil
°caprōne	°	caprṓne				239	phonét.	chevron																															chevron
capsa		cápsa				298	phonét.	chasse																															châsse
°captiāre	°	captiāre				139, 207, 284, 284.3, 284.5	phonét.	chacier																															chasser
captīvu		captī́vu				221.4, 313.2	phonét.	chaitif																					chétif										chétif
°capu	°	cápu				254, 306, 311, 313.2, 385	phonét.	chief		,	chef																		chief										chef
capulu		cápulu				334, 341	phonét.	chable																															câble
caput		cáput				254, 306, 311, 313.2, 385	phonét.	chief		,	chef																		chief										chef
caragiu		carágiu				239	phonét.	charai																												‘sortilège’
carāmente		cárāménte				236.1	phonét.	chierement																															chèrement
carbōne		carbṓne				220.1	phonét.	charbon																															charbon
carcere		cárcere				93, 112, 116.1, 116.2, 139, 139.2, 142, 349, 349.2	variation	charcre		,	chartre																												chartre
cardine		cárdine				67, 68.1	phonét.	charne																															carne	‘gond’
Carentomagu		Carentómagu				246.5	phonét.	Carenton		,	Carentan																												Carenton		,	Carentan
cāritāte		cāritā́te				206.7	phonét.	charte		,	cherte																												cherté
carmen		cármen				291.3	phonét.	charme																															charme
carmināre		carminā́re				291.3	phonét.	charmer																												‘enchanter’
carnāle		carnā́le				206.8	phonét.	charnel																															charnel
carne		cárne				374		char	Rol																														chair
Carolu		Cárolu				259, 259.5, 370	phonét.	Charle		,	Karlo	Serm																											Charles
°carōnia	°	carṓnia				188, 239	phonét.	charogne																															charogne
carpinu		cárpinu				244, 258, 258.1, 291.3, 292.10	phonét.	charme	arbre																														charme	arbre
carru		cárru				105, 107, 173.1, 200, 244, 255, 291.4	phonét.	char																															char
carrūca		carrū́ca				322	phonét.	charrue																															charrue
°carrūcāre	°	carrūcā́re				128	phonét.	charruer		,	charruier																												charrier
cartula		cártula				334, 348	phonét.	chartre																															charte
°Cartunes	°	Cártunes				68, 250.1	substitution de sonante	Chartres																															Chartres
cāru		cā́ru				100.1, 105.1, 200, 200.4, 206.7, 207, 244, 307, 331, 350, 385	phonét.	chier		>	cher																		chier										cher
casa		cása				260.5	chies, ches proclise, analogie ou < casu	chiese		,	chese		,	chies		,	ches																			‘maison’			chez	cf. toponyme La Chaise-Dieu
casālis		casā́lis				239	phonét.	chasel																												‘métairie’
casta		cásta				175.5	savant	chaste																															chaste
castanea		castánea				175	phonét.	chastaigne																															châtaigne
°castellōs	°	castéllōs	acc pl			175, 181, 303	variation	chastel		,	chasteaux	pl	,	chastiaux	pl																						castle	angl	château
castellu		castéllu				175, 181, 303	variation	chastel		,	chasteaux	pl	,	chastiaux	pl																						castle	angl	château
castigāre		castigā́re				93.1, 175, 267, 271, 323	phonét.	chastiier																															châtier
castīgat		castī́gat	3s			323	phonét.	chastie																															(il) châtie
casu ?		cásu ?				260.5	chies, ches proclise, analogie ou < casu	chiese		,	chese		,	chies		,	ches																			‘maison’			chez	cf. toponyme La Chaise-Dieu
°catabola	°	catábola		καταϐολή		235.4	phonét.	chaable		,	chable																									‘châblis’
Catalaunis		Cataláúnis				235.4, 261, 345	phonét.	Chaelons																															Châlons-sur-Marne
°catalectu	°	cataléctu				235.4, 261	phonét.	chaelit																															châlit
catellu		catéllu				239	phonét.	chael																												‘jeune chien’
catēna		catḗna				215, 235.4, 239	phonét.	chaeine																															chaîne
°catēniōne	°	catēniṓne				182.2, 235.4, 260.3	variation, croisement avec tignon ?	chaeignon		,	chaignon		,	chignon																						‘collier’			chignon		X	tignon
cathedra		cathédra				85, 235.4, 239, 334, 365	phonét.	chaiere																															chaire		,	chaise
Catomagu		Catómagu				217.1, 246.5, 320.2	phonét.	Caem		,	Caðun																												Caen
cattu		cáttu				255	phonét.	chat																															chat
Caturigas		Catúrigas	celt			271	phonét.																																Chadorges
caule		cáúle				223.2	chou analogique	chol																															chou
caules		cáúles	pl			223.2	phonét.	chous	CRp																														chou
caumāre		caumā́re				246	phonét.	chomer																															chômer
°caumat	°	cáúmat	3s			223.3	phonét.	chome																															(il) chôme
causa		cáúsa				10, 13, 70.1, 105, 223, 309, 315, 325, 325.1, 359, 383	phonét.	cosa	Serm	,	chose	[z]																	chose		,	chouse							chose	[z]
cavea		cávea				50, 105.5, 285.2, 298	jaie chute précoce de la labiale, cage emprunt au picard, normand	jaie		,	cage		,	chage																						‘cage’			cage
°caveola	°	cavéola				148, 285.2	chute précoce de la labiale	jaiole		,	jaole																												geôle
°cecinu	°	cécinu				112	phonét.	cisne																															cygne
cēlāre		cēlā́re				241	phonét.	celer																															celer
cellārium		cellā́rium				97.2b	phonét.																														Keller	nha
cēnsu		cḗnsu				291.4	phonét.	cens																															cens
centu		céntu				95, 97, 99, 104	phonét.	cent																															cent
cēpa		cḗpa				213.5, 214	ae > e cas minoritaire	cive																															cive
cēra		cḗra				49.1, 97, 100, 214	phonét.	cire																															cire
cerasia		cerásia	pl	κέρασοϛ, κερασόϛ		179.4, 237	phonét.	cerise																															cerise
cerasum		cérasum				97.2b	phonét.																														Kirsche	nha
°cercēdula	°	cercḗdula				264.2, 345	phonét.	cercele		,	cercelle																												sarcelle
cerebellu		cerebéllu				267, 269, 295, 302, 307	phonét.	cervel																															cerveau
cerebrum		cérebrum				335.1a
°ceresia	°	cerésia		κέρασοϛ, κερασόϛ		179.4, 237	phonét.	cerise																															cerise
cēreu		cḗreu				49, 49.1, 150, 278.1, 279, 287, 371.2	cerge savant, cirge savant et analogique, cierge disputé	cerge		,	cirge		,	cierge																									cierge
cerva		cérva	lc			177	phonét.	cierge		,	cerge																									‘biche’
Cervedūnum		Cervedū́num				270, 270.3	phonét.	Cervon	Nièvre																														Cervon	Nièvre
cervēsia		cervḗsia				289	phonét.	cervoise																															cervoise
cervia		cérvia				177	phonét.	cierge		,	cerge																									‘biche’
cervu		cérvu				176, 289.6, 374	phonét.	cerf		,	cerfs	pl																											cerf
chīrurgia		chīrúrgia				281	phonét.	cirurgie																															chirurgie
chīrurgicu		chīrúrgicu				272	phonét.	surge																												‘chirurgien’
Chlodavīcus		Chlodavī́cus				52.2, 264.3, 319.7	phonét.	Cloevis		>	Clovis																												Clovis
Chlodoward		Chlodoward	frk			319.7	phonét.	Clouard																															Clouard
chrisma		chrísma		χρῖσμa		259.6	phonét.
christiānu		christiā́nu				66.5, 288	savant	crestien		,	chrestiien																												chrétien	[tj]
Christophoru		Christóphoru				68.2	substitution de sonante	Christophle																															Christophe
cicer		cícer				97.2b, 112, 117.5, 117.7, 329, 346.1	phonét.	ceire		>	çoire		=	cedre	jud.fr.																						Kicher	nha	(pois) chiche
cicōnia		cicṓnia				322	phonét.	ceoigne																															cigogne
cicūta		cicū́ta				322	phonét.	ceue																															ciguë
°cīliu	°	cī́liu				182.3, 191.2	suffixe -iliu > °-īliu	cil																															cil
°cīmīteriu	°	cīmītériu		Κοιμητήριον		179.1, 288.1	savant, adaptation de gr η	cemetire		,	cimitire																										cemetery	angl	cimetière
cīmītēriu		cīmītḗriu		Κοιμητήριον		179.1, 288.1	savant, adaptation de gr η	cemetire		,	cimitire																										cemetery	angl	cimetière
cinctūra		cinctū́ra				136, 184, 184.2	phonét.	ceinture																															ceinture
cinere		cínere				97, 116.3, 250, 292	phonét.	cendre																															cendre
cinge		cínge	2s impér.			134	phonét.	ceing		,	cein																												ceins !
cingere		cíngere				184, 349	phonét.	ceindre																															ceindre
cingit		cíngit	part. pass.			97.4	phonét.	ceint																															ceint
cingula		cíngula				349	phonét.	cengle																															sangle
°cīnquanta	°	cīnquánta				191	i probablement analogique	cincante																															cinquante
°cīnque	°	cī́nque				191, 264, 264.2	phonét.	cinc		,	cinq																												cinq
cinxīsti		cinxī́sti	2s pf			136	phonét.	ceinsis																															(tu) ceignis
cippu		cíppu				182, 264.6, 296, 313.2	phonét.	cep																															cep
circinu		círcinu				67, 258	phonét.	cerne																															cerne
circulu		círculu				334, 349	phonét.	cercle																															cercle
cista		císta				97.2b	phonét.																														Kiste	nha
citera		cítera		κιθάρα		237	variation	citre																															cithare
cithara		cíthara		κιθάρα		237	variation	citre																															cithare
cīvitāte		cīvitā́te				97, 191, 206.7, 224.3, 242, 259.3, 265, 298	phonét.	cite	Alex	,	ciutat	Lég 141	,	ciptet	Alex 42	,	citet	Rol 5																					cité
°cīvite	°	cī́vite				191, 224.3, 259.3	ph ?	cit																												’cité’
Clamiciācu		Clamiciā́cu				264.3	phonét.																																Clamecy	Nièvre
clāmo		clā́mo	1s			254.2	analogique	claim																															(je) clame
°clārēa	°	clā́rēa				174.2	phonét.	glaire																												‘blanc d'œuf cru’			glaire
clāru		clā́ru				174.2	phonét.	glaire																												‘blanc d'œuf cru’			glaire
clāru		clā́ru				206	phonét.	cler																															clair
°clauderat	°	clauderát	3s fut			344	phonét.	clorra																															(il) clora
claudere		cláúdere				223, 344	phonét.	clore																															clore
clausitura		cláúsitura				359		closture																															clôture
claustru		cláústru				193	phonét.	clostre																															cloître
clausu		cláúsu				223, 307	phonét.	clos																															clos
clausūra		clausū́ra				246	phonét.	closure																												‘clôture’
clave		cláve				333, 334, 349, 360	phonét.	clef		,	clavel																												clef
clāvis		clā́vis				335.4
clāvu		clā́vu				93, 205, 209, 224.3, 228, 234, 316, 318, 330, 365	phonét.	clou		,	clau		,	clo		,	cleu																						clou
clēricātu		clēricā́tu				271	phonét.	clergié																															clergé
clēricu		clḗricu				264.4, 267, 272	phonét.	clerc																															clerc
clēta		clḗta				350	variation, action de la norme	cloie		>	claie																												claie
Clippiācu		Clippiā́cu				285, 318.2, 207.1c	phonét.	Clichy																															Clichy
°cloppicāre	°	cloppicā́re				29.1	phonét.	clochier																															clocher
coāgulāre		coāgulā́re				66, 173	phonét.	caillier																															cailler
coccu		cóccu				185, 313.2, 356, 374	phonét.	coc	sg	,	cos	pl																	coq										coq
°cocere	°	cócere				112, 139, 300	phonét.	cuire																															cuire
cochlear		cóchlear				300, 334, 346	variation	cuillier		,	coller	GDC Roman d'Alex 12e																											cuiller
°cocīna	°	cocī́na				97, 139, 324.6, 388	phonét.	cuisine																					cuisine		,	cuirene							cuisine
coctiōne		coctiṓne				300.8	phonét., variation	coçon																												‘marchand’
cocu		cócu				218	phonét., formes en -ieu dissimilation	cous	pl, Rol 1817	,	queu		,	keu		,	kieu																						queux
cōda		cṓda				320	phonét.	coe																															queue
Codiciacu		Codicíacu				283	phonét.																																Coucy	Aisne
cœmētēriu		cœmētḗriu		Κοιμητήριον		179.1, 288.1	savant, adaptation de gr η	cemetire		,	cimitire																										cemetery	angl	cimetière
cōgitāre		cōgitā́re				113, 207, 270, 300	phonét.	cuidier																															cuider
cōgitat		cṓgitat	3s			270, 270.1	variation	cuide		,	cuie																												(il) cuide
cōgito		cṓgito	1s			165, 172	phonét.	cuit																															(je) cuide	arch.
cognitu		cógnitu				134, 137, 149, 256.2	obscur	cointe																												‘avisé, prudent’
°cognoscere	°	cognóscere				349, 350.3	phonét.	conoistre		>																			connaître										connaître
°colapāre	°	colapā́re				269	phonét.	coper																															couper
colaphum		cólaphum	lc	κόλαφος		185, 237.1, 256, 264.4, 267, 269, 365, 369, 370, 372, 373, 374	phonét.	colp		>	coup		,	cop		,	colps	CSs, CRp, Rol																					coup
cōlāre		cōlā́re				243	phonét.	coler		,	couler																												couler
collībertu		collībértu				269	phonét.	culvert																												‘serf’
colligere		collígere				273.1	analogique	coillir																															cueillir
colligit		cólligit	3s			273.1	analogique	cueilt																															(il) cueille
colligō		cólligō	1s			273.1	phonét.	cuele																															(je) cueille
collocāre		collocā́re				190, 271.3, 271.4	phonét.	colchier		>	couchier																												coucher
collocat		cóllocat				84.2	phonét.	couche																															(il) couche
collocet		cóllocet	3s subj			67.7, 112	phonét.	culzt																															(qu’il) couche
collu		cóllu				185, 185.1	analogique	col																															col		,	cou
°colobra	°	colóbra				85, 216.3, 335.2, 337	phonét.	coluevre																															couleuvre
colophu		cólophu		κόλαφος		185, 237.1, 256, 264.4, 267, 269, 365, 369, 370, 372, 373, 374	phonét.	colp		>	coup		,	cop		,	colps	CSs, CRp, Rol																					coup
°colopu	°	cólopu		κόλαφος		185, 237.1, 256, 264.4, 267, 269, 365, 369, 370, 372, 373, 374	phonét.	colp		>	coup		,	cop		,	colps	CSs, CRp, Rol																					coup
colubra		cólubra				85, 216.3, 335.2, 337	phonét.	coluevre																															couleuvre
columbu		colúmbu				264.4	phonét.	colom																															coulon	oiseau						coloma	cat
columna		colúmna				292.8	variation (graphique)	colombe		,	colone		,	calumpnia		,	columpne																						colonne
comes		cómes	nom sg			51, 185, 217, 231, 242, 259, 270, 367, 370, 372	phonét.	conte	CRs	,	comte	CRs	,	cuens	CSs	,	quens	CSs, Rol																					comte
cominitiāre		cominitiā́re				184	phonét.	comencier																															commencer
comite		cómite	acc sg			51, 185, 217, 231, 242, 259, 270, 367, 370, 372	phonét.	conte	CRs	,	comte	CRs	,	cuens	CSs	,	quens	CSs, Rol																					comte
commeātu		commeā́tu				285	phonét.	congié																															congé
commūnicāre		commūnicā́re				190.1, 268.1, 267, 271.1	comengier dissimilation, comuniier savant	comengier		,	comuniier																												communier
companiōne		companiṓne				130, 134	phonét.	compagnon																															compagnon
Compendiu		Compéndiu				178.1	probablement dialectal	Compiègne																															Compiègne
comprēndere		comprḗndere				348	phonét.	comprendre																															comprendre
computat		cómputat	3s			84.2	phonét.	conte																															(il) conte
computo		cómputo	1s			185	phonét.	conte																															(je) conte
con+locat		con+locat	3s			84.2	phonét.	couche																															(il) couche
conciliu		concíliu				68	emprunt tardif	concilie		,	concile		,	concire																									concile
conclūdere		conclū́dere				349	phonét.	conclure																															conclure
conclūsu		conclū́su	cf. conclūdere			222.1	phonét.	conclus																															conclu
cōnfectus		cōnféctus				335.1a
conficere		confícere				112, 183.2	résolution de bonne heure de la vélaire	confire																															confire
cōnfīciō		cōnfī́ciō				335.1a
Confluente		Confluénte				289.7	phonét.	Conflans	Sainte-Honorine, Yvelines																														Conflans	Sainte-Honorine, Yvelines
confūsu		confū́su	cf. confundere			222.1	phonét.	confus	adj.																														confus
cōnsecrāre		cōnsecrā́re				335.1a
°cōnsere	°	cṓnsere				93, 292, 292.9	variation	costre		,	cosdre																												coudre
°conserviu	°	consérviu				285	phonét.	concierge																															concierge
consiliu		consíliu				182.3, 191.2, 291.5	phonét.	conseil	CRs	,	conseuz	CRp																											conseil
cōnsuere		cōnsúere				93, 292, 292.9	variation	costre		,	cosdre																												coudre
°consuētūdine	°	consuētū́dine				289.1	phonét.	costume																															coutume
consūtu		consū́tu	cf. consuere			222.1	phonét.	cousu																															cousu
°consūtūra	°	consūtū́ra				244	phonét.	costure		,	cousture																												couture
contra		cóntra				185, 288.1	phonét.	contre																													contrary	angl	contre
°conucula	°	conúcula				245, 226, 232	phonét.	conoille		,	quenoille																												quenouille
conventu		convéntu				166.1, 243	chute erratique de n en coda	covent		,	couvent																									‘accord’ (couvent)			couvent
cōperculu		cōpérculu				349	phonét.	couvercle																															couvercle
cōperit		cṓperit	3s			216.3	phonét.	cuevre																															(il) couvre
cophinu		cóphinu		κόφινοϛ		68.2, 250.1, 298.1	substitution de sonante	cofre																															coffre
coquīna		cóquīna				97, 139, 324.6, 388	phonét.	cuisine																					cuisine		,	cuirene							cuisine
coquu		cóquu				218	phonét., formes en -ieu dissimilation	cous	pl, Rol 1817	,	queu		,	keu		,	kieu																						queux
cor		cór				12, 13, 90, 216, 264, 307, 310, 329	variation	cuer		,	quer	Rol 2356	,	quor	Alex 166	,	coer	Rol 299	,	cor																			cœur
°corāticu	°	corā́ticu				272	phonét.	corage																															courage
corbicula		corbícula				188	o irrégulier	corbeille																															corbeille
Corduba		Córduba				93	phonét.	Cordes																															Cordoue
Corduba+eis-ier		Córduba+eis-ier				93	variation	corvoisier																															cordonnier	nom de famille Corvoisier
coriu		córiu				186, 284	phonét.	quir		,	cuir																												cuir
cornu		córnu				185, 256, 258.1, 291.4, 291.5, 370, 373, 374	phonét.	cor		,	corn	CRs, Rol	,	corz	CSs	,	corns	CSs, CRp																					cor		,	corne
corōna		corṓna				37.1, 73, 220, 243, 245	phonét.	corone		,	couronne		,	querone																									couronne
corpus		córpus				256, 356, 370, 373, 374	phonét.	cors		,	corps	CSs, CRp, Eul, StLég				,	cos	pl																					corps
corrigia		corrígia				148, 281	phonét.	correie																															courroie
corrogāta		corrogā́ta				317.3	phonét.	corvee																															corvée
°corrotulāre	°	corrotulā́re				345	phonét.	croler																															crouler
corruptiāre		corruptiā́re				190.1	corecier dissimilation	corecier		,	corocier		,	courroucier																									courroucer
°cortēse	°	cortḗse				213.6	phonét.	courtois																															courtois
corvu		córvu				289.5, 372	irrégulier	corbel		,	corp																												corbeau
°cōsere	°	cṓsere				93, 292, 292.9	variation	costre		,	cosdre																												coudre
cosmos		cósmos		κόσμοϛ		259.6	phonét.
costa		cósta				185, 363	phonét.	coste		>	cote																												côte
Cotiu		Cótiu				186	phonét.	Cuis																															Cuis
cotōneu		cotṓneu				243.2	phonét.	cooin		,	coin																												coing
Covedonia		Covedónia	attesté en 1006, Nègre 10234			270, 270.3	phonét.	Couvonges	Meuse																														Couvonges	Meuse
coxa		cóxa				186	phonét.	cuisse		,	coisse	Serm																											cuisse
crassia		crássia				140, 284	phonét.	craisse																															graisse
crātīcula		crātī́cula				235.3, 235.4, 240.1	variation	graille		,	greille																												grille
°crātīculu	°	crātī́culu				235.3, 235.4, 240.1	variation	grail		,	greil																												gril		,	grille
crēdentia		crēdéntia				180, 284	phonét.	creance																															créance
crēdere		crḗdere				333, 334, 344, 349	phonét.	creire																															croire
°cremere	°	crémere				211.1, 350	analogique	criembre																															craindre
crepō		crépō	1s			350	phonét.	crieve		,	creve																												(je) crève
crēscere		crḗscere				112, 116.1, 140, 140.1, 149, 183, 349	phonét.	croistre		>	croitre																												croître
crēta		crḗta				49, 88, 213, 350	phonét.	creie		>	croie		>	crwee		>	craie	13e																					craie
crīne		crī́ne				333, 334	phonét.	crin																															crin
°crīnūtu	°	crīnū́tu				224.2	phonét.	crenu																												‘à longue crinière’
crispu		críspu				256, 372, 374	phonét.	cres	pl	,	cresps	pl		creps	pl		cresp		,	crep																‘frisé’			crépu		,	crêpé
cruce		crúce				97.1, 350	phonét.	crois		=	crois	pic																											croix
°crūdāle	°	crūdā́le				206.8	phonét.	cruel																															cruel
crūdāmente		crūdāménte				261	phonét.	cruement																															crûment
crūdēle		crūdḗle				206.8	phonét.	cruel																															cruel
crūdu		crū́du				222	phonét.	cru																															cru
cubāre		cubā́re				73, 89, 243, 316, 317, 319	variation	cover		,	couver																												couver
cubat		cúbat	3s			202, 219.2	phonét.	couve																															(elle) couve
cubitu		cúbitu				51, 93, 259, 267, 268, 270	variation	cote		,	coute		,	code		,	coude																						coude
cuculla		cucúlla				243.2	phonét.	coolle		,	coule																												coule
cucumere		cucúmere				292	phonét.	concombre																															concombre
cucurbita		cucúrbita				243.2, 270, 322	phonét.	coorde		,	courde		,	coorge																									courge		,	gourde
culcita		cúlcita				112, 112.1, 112.3, 114	variation	coustepointer	‘garnir intérieurement de coton’ (1419)	,	coustes	pl	,	cousterie	‘métier des coutiers’ (1347)	,	coustepointe	‘couverture de lit ouatée et piquée’ (1290–1416)	,	coilte	,	cuilte	,	coute	,	coite	,	couste											couette
culpa		cúlpa				190	phonét.	colpe																															coulpe
cūlu		cū́lu				222, 254, 356	phonét.	cul	sg	,	cus	pl																											cul
cumulāre		cumulāre				190, 292	phonét.	combler																															combler
cumulu		cúmulu				250	phonét.	comble																															comble
cuneāta		cuneā́ta				134, 188	phonét.	coigniee		,	cognee																												cognée
cuneu		cúneu				255, 277, 283	phonét.	coing																															coin
cunnu		cúnnu				166.2, 255	phonét.	con																															con
cūpa		cū́pa				72, 222, 317, 319	phonét.	cuve																															cuve
Cupedonia		Cupedónia				270, 270.3	phonét.	Couvonges	Meuse																														Couvonges	Meuse
°cupidietāre	°	cupidietā́re				183	phonét.	coveitier		,	covoitier																												convoiter
°cūpriu	°	cū́priu				139, 149, 284, 67.6, 139.1, 284.5	phonét.	cuivre																															cuivre
cūrātu		cūrā́tu				296.4	phonét.	curé		,	curré																												curé
currere		cúrrere				221.3, 255.3, 292	refait	courre		,	corre																												courir
curvāre		curvā́re				289.5	irrégulier	corber																															courber
custor		cústor				251	phonét.	costre	CSs																											‘sacristain’
dalmatica		dalmática				288	emprunt au latin	daumaie		,	daumaire																									‘vêtement liturgique’
damnāre		damnā́re				292.8	variation (graphique)	dampner																															damner
damnātiōne		damnātiṓne				292.8	variation (graphique)	dampnatio																															damnation
damnu		dámnu				256.2	variation	dan		,	dam																												dam
°danisca	°	danísca				182.6	phonét.	danesche																															danoise
dare		dáre				335.1a
°daurāre	°	daurā́re				246	phonét.	dorer																															dorer
dē eā rē		dē eā́ rē				281	phonét.	giers																												‘donc’
deaurāre		deaurā́re	lc			246	phonét.	dorer																															dorer
dēbeo		dḗbeo	1s			285.2, 366, 374	dei dû à la chute précoce de la labiale	dei		,	deif																												(je) dois
dēbēre		dēbḗre				213.4, 241, 319	phonét.	deveir		>	devoir																												devoir
dēbet		dḗbet	3s			298.4, 366, 373	phonét.	deift		,	dift	Serm	,	deit																									(il) doit
dēbita		dḗbita				242, 265, 266, 270	phonét.	dete																															dette
decānu		decā́nu				183, 207	phonét.	deien		>	doien		,	doiien																									doyen
decem		décem				179, 312.1, 375, 380	phonét.	dis																					dix										dix
decimu		décimu				112, 258, 291	phonét.	disme																															dîme
dēcipere		dēcípere				214.4, 340	FC refait	deceivre																															décevoir
defensu		defénsu				319.3	savant	defois																												‘défense’
dēforis		dēfóris	dē+foris			216.5, 261.1, 317, 319, 319.3	absence diphtongaison obscure	defuer		,	defors		>	dehors		,	deors																						dehors
dēlicātu		dēlicā́tu				88, 184	phonét.	deugie																												‘délicat’
delphīnu		delphī́nu				182.5	variation	daufin		,	delfin																												dauphin
demorat		demórat	3s			369																																	(il) demeure
°dēnārāta	°	dēnārā́ta				260.1	phonét.	deneree		>	denree																												denrée
dēnāriu		dēnā́riu				174.2, 241	évolution -āriu obscure	denier																															denier
dente		dénte				12, 264, 180	phonét.	dent																															dent
derbita		dérbita				176.2, 273.3	variation	derte		,	dertre																												dartre
deretro		derétro				85	phonét.	deriere																															derrière
des + jam		des + jám				206.4	phonét.	desja																															déjà
°des-hring-	°	des-hring-	frk			292.4	phonét.	desrengier																															déranger
despicere		despícere				183.2	résolution de bonne heure de la vélaire	despire																												‘mépriser’
deu		déu				66.2, 205, 212, 212.4, 365	phonét.	deo	Serm	,	dieu		,	diu	< pic ?																								Dieu
deus		déus				66.2, 205, 212, 212.4, 365	phonét.	deo	Serm	,	dieu		,	diu	< pic ?																								Dieu
diabolu		diábolu				66.5, 343, 379	savant	diaule		,	diable																		diable										diable
diāconu		diā́conu		διάκονοϛ		66.5, 250.1, 371	savant	diacre		,	diacne																												diacre
Diana		Diana				281	phonét.	gene																												‘sorcière’
dīcēbam		dīcḗbam	1s imp			214.2	analogique	diseie		,	disoie																												(je) disais
dīcēnte		dīcḗnte				214.2	analogique	disant																															disant
dicerajo		dicerájo	1s fut			117.7	phonét.	didrai	StLég 7	,	ditrai	StLég 9																											(je) dirai
dīcere		dī́cere				112	phonét.	dire																															dire
digita		dígita				213.7, 270.2	phonét.	deie		,	doie																									‘unité de mesure évaluée à l’épaisseur d’un doigt’
digitāle		digitā́le				270.2	phonét.	deel																												‘dé à coudre’
digitu		dígitu				213.7	phonét.	deit		,	doit																												doigt
dignāre		dignā́re				182	phonét.	deignier																															daigner
dignitāte		dignitā́te				134, 206.7, 207	phonét.	deintie		,	daintie																									‘testicules du cerf’			dignité
°dīmediu	°	dīmédiu				241, 241.3	analogique	demi																															demi
dīmidiu		dīmídiu				241, 241.3	analogique	demi																															demi
°dintiare	°	dintiáre				286	phonét.	dancier																															danser
°dintjan	°	dintjan	frk			286	phonét.	dancier																															danser
°dīrectiāre	°	dīrectiā́re				241.3	perte de la voyelle initiale dès le lt	drecier																															dresser
dīrectu		dīréctu				241.3, 350, 350.2	perte de la voyelle initiale dès le lt	dreit		,	droit		>	dret																									droit
discus		díscus	nom sg			67.7, 264.7, 350.3	phonét.	deis		>	dois																		dais							‘estrade où est dressée une table d’honneur’			dais
°disjunāre	°	disjunā́re				303, 303.3	phonét.	disner		=	dirner	pic																									dine	angl	dîner
°districtia	°	distríctia				300.8	phonét., variation	destrece																															détresse
°dita	°	díta				213.7, 270.2	phonét.	deie		,	doie																									‘unité de mesure évaluée à l’épaisseur d’un doigt’
°ditāle	°	ditā́le				270.2	phonét.	deel																												‘dé à coudre’
°ditu	°	dítu				213.7	phonét.	deit		,	doit																												doigt
diurnu		diúrnu				150, 256, 281, 291.5, 356, 372, 373.2, 374	phonét.	jorn	CRs	,	jorz	CRp	,	jor	CRp																								jour
dīvīnu		dīvī́nu				241, 224.2	phonét.	devin																															devin
°dīvīsāre	°	dīvīsā́re				224.2	phonét.	deviser																															deviser
dīvīsum		dīvī́sum	lc			224.2	phonét.	deviser																															deviser
°docere	°	dócere				112	phonét.	duire																												‘instruire’
°dōdece	°	dṓdece				273, 273.3	phonét.	doce		,	doze																												douze
doga		dóga				317.3, 322	variation	dove		,	doue																												douve
dolōre		dolṓre				219.5, 371	phonét.	douleur		,	dolour																												douleur
domesticu		domésticu				272	phonét.	domesche																												‘domestique’
°dominiariu	°	dominiáriu				291.3	phonét.	dangier																															danger
°dominiōne	°	dominiṓne				285, 291.3	variation	donjon		,	doignon																												donjon
dominu		dóminu				256.2	variation	dan		,	dam																									‘seigneur’
dominum		dóminum				371
dominum		dominúm				371
Domne Deu		Dómne Deu				292.8	variation (graphique)	Dambredieu																															Dambredieu
°domnicella	°	domnicélla				273.2, 291.3	phonét.	damoisele																															demoiselle
°domnicella	°	domnicélla				267, 273, 273.2	phonét.	dancele		,	donzele																												donzelle
°domnicellu	°	domnicéllu				183, 273, 273.2	variation	dancel		,	donzel		,	dameisel		,	damoisel																			‘jeune homme’			damoiseau
dōnāre		dōnā́re				243.1	phonét.	doner		,	duner																												donner
dōnat		dṓnat	3s			299.1, 327, 344.1	phonét.	donet																															(il) donne
donera		donera	3s fut			260.1, 292.6	phonét.	donera		>	donra																												(il) donnera
dōnu		dṓnu				220, 331	phonét.	don																															don
dormīre		dormī́re				188, 356	phonét.	dormir		,	dourmir																												dormir
dormit		dórmit	3s			242, 291.3, 366	phonét.	dort																															(il) dort
dormītōriu		dormītṓriu				231, 242, 365	phonét.	dortoir																															dortoir
°dormunt	°	dórmunt	3p			159.1	phonét.	dorment																															(ils) dorment
dracunculu		dracúnculu				349	phonét.	draoncle																												‘abcès’
drappu		dráppu				255, 264.4, 333, 334, 348, 356, 374	phonét.	drap	sg	,	dras	pl																											drap
°Duācu	°	Duā́cu				318.2	phonét.	Douai	Nord																														Douai	Nord
dubitāre		dubitā́re				270, 298	phonét.	doter																															douter
dūc		dū́c	2s impér.			327	phonét.	dui																															(con)duis !
ducem		dúcem	ltm acc sg			105.3, 313.2	savant	duc																															duc
dūcere		dū́cere				112	phonét.	duire																															(con)duire
dūcit		dū́cit				67.7	phonét.	duist																															(il) (con)duit
ductor		dúctor				251	phonét.	duitre	CSs																											‘chef’
°duiʦt	°	dúíʦt				67.7	phonét.	duist																															(il) (con)duit
dulce		dúlce				112	phonét.	dols																															doux
dulcia		dúlcia				283	phonét.	douce																															douce
°dulja	°	dulja	g			286	phonét.	doille																															douille
dum interim		dum ínterim				224.3	phonét.	domentre		,	domentres																									‘pendant (que)’
dūmus		dū́mus	lc			259.6	phonét.
duos		dúos				219	phonét.	deus																															deux
duplu		dúplu				250, 337.4a, 340.3, 341	variation	double		,	dovle	TL2-1971 : 40 ; 1972 : 2	,	doble																									double
dūrāre		dūrā́re				224.2	analogique	durer																															durer
dūrat		dū́rat	3s			224.2	phonét.	dure																															(il) dure
°dūricīre	°	dūricī́re				273	phonét.	durcir																															durcir
dusmus		dúsmus	lat. arch.			259.6	phonét.
dux		dúx	nom sg			105.3, 313.2	savant	duc																															duc
-ēbam		-ḗbam	1s imp			213.3	phonét.	-oie																															-ais
-ēbant		-ḗbant	3p imp			213.3	phonét.	oient																															-aient
-ēbas		-ḗbas	2s imp			213.3, 385	phonét.	-ois																					-ois		,	-ais							-ais
-ēbat		-ḗbat	3s imp			213.3, 350.3, 385	phonét.	-oit																					-oit		,	-ait							-ait
eboreu		ebóreu				189.3, 241.2, 288.1	obscur	ivuire		,	ivire		,	ivoire																							ivory	angl	ivoire
°ebōreu	°	ebṓreu				189.3, 241.2, 288.1	obscur	ivuire		,	ivire		,	ivoire																							ivory	angl	ivoire
ēbriāca		ēbriā́ca				241.2	analogique	ivraie																															ivraie
°ebriu	°	ébriu				67.6, 139, 179, 212.1, 284	phonét.	ivre																															ivre
ēbriu		ḗbriu	lc			67.6, 139, 179, 212.1, 284	phonét.	ivre																															ivre
ebulu		ébulu				93, 210, 250, 339, 341, 341.2, 341.3, 350.1, 337.4c	variation	hieble		,	ieble		,	eble																									hièble
ecce		écce				112, 176, 255	phonét.	eis		,	ez		,	es																						‘voici’
°ecce hāc	°	ecce hāc				327, 327.1	phonét.	çai	tonique	,	sai	tonique	,	ça	atone	,	sa	atone																					çà
°ecclesia	°	ecclésia		ἐκκλησία		179.1, 221.5, 346.2	adaptation de gr η	eglise		,	glise																												église
ecclēsia		ecclḗsia		ἐκκλησία		179.1, 221.5, 346.2	adaptation de gr η	eglise		,	glise																												église
elēmosina		elēmósina		ἐλεημοσύνη		182.5, 303.3	variation	almosne		=	almorne	pic																											aumône
elephante		elephánte				319.3	savant	olifant																															éléphant
-emere		-émere				211.1	-eindre analogique	-iembre		,	-eindre																												-eindre
encaustu		éncaustu		ἔγκαυστον		246.4	savant, obscur	enque																															encre
engle		engle	g			349, 350.3	phonét.	englois																															anglais
-ēnse		-ḗnse				213.6	phonét., -ois substitution de suffixe	-is		,	-ois																												-is		,	-ois
-ent		-ent	3p			242.3	analogique	-ant																															-ant	[-ə(t)]
-eolu		-éolu				216.4	phonét.	-uel		,	-eul																												-eul
episcopu		epíscopu				84.1, 371	perte de la dernière syllabe	evesque																															évêque
epistula		epístula				68	non-phonétique	epistre		,	epistle																												épître
equa		équa				289, 300, 324	phonét.	ive																												‘jument’
-ēre		-ḗre	inf			213.4, 380	phonét.	-oir																					-oir										-oir	inf
eremu		éremu				291	phonét.	herme		,	erme																									‘lieu inculte’
-eria		-éria				179.2	-ier, -iere sous l'influence de -ier /-iere < -āriu, -a	-ire		,	-ier		,	-iere																									-ire		,	-ier		,	-ière
erīciōne		erīciṓne				283	phonét.	heriçon																															hérisson
-eriu		-ériu				179.2	-ier, -iere sous l'influence de -ier /-iere < -āriu, -a	-ire		,	-ier		,	-iere																									-ire		,	-ier		,	-ière
Ermedōnis		Ermedṓnis				270, 270.3	phonét.	Ermont	Val-d’Oise																														Ermont	Val-d’Oise
esca		ésca				176	phonét.	esche																															esche
°esclāgu	°	esclā́gu				292, 322.4	phonét.	esclo		,	esclou																												esclot
°escribere	°	escríbere	lt			30, 153.1, 182.1	phonét.	escrivre		,	escrire																												écrire
°escultāre	°	escultā́re				190, 193.1, 235.1	dissimilation, formes en es- par substitution de préfixe	ascouter		,	escolter		,	escouter																									écouter
-ēse		-ḗse				213.6	phonét., -ois substitution de suffixe	-is		,	-ois																												-is		,	-ois
essere		éssere				116.3, 176, 250, 292, 292.9, 303, 303.1	phonét.	estre																															être
et		et				13, 35, 306, 308, 327	phonét.	ed		,	et		,	e																									et	[e]
°exaequāre	°	exaequā́re				324	phonét.	essever																												‘s'écouler’
exagiu		exágiu				281, 300.8, 323.3	phonét.	essai																															essai
°exaltiāre	°	exaltiā́re				284	phonét.	essaucier																															exaucer
exāmen		exā́men				208, 328.2	phonét.	essaim		,	essain																												essaim
°exblaudīre	°	exblaudī́re				246.3, 247	phonét.	esbloir		,	esblouir		,	esbloer		,	esblouer																						éblouir
excaldāre		excaldā́re				175	phonét.	eschauder																															échauder
°ex-carbunculu	°	ex-carbúnculu				349	phonét.	escarboncle																															escarboucle
°exclāriāre	°	exclāriā́re				174	phonét.	esclairier																															éclairer
°exclāricīre	°	exclāricī́re				158	phonét.	esclarcir																															éclaircir
°excollubricāre	°	excollubricā́re				337.3b	variation	escolovregier		,	escolovergier																									‘glisser, couler’
excommūnicāre		excommūnicā́re				158, 271.1	savant	escomeniier		,	escomungier		,	escomengier																									excommunier
excondīcere		excondī́cere				191.3	phonét.	escondire																															éconduire
excorticāre		excorticā́re				158	phonét.	escorchier																															écorcher
exemplum		exémplum				335.4
°exfridāre	°	exfridā́re				128, 320, 348	phonét.	esfreer	Rol	,	esfreier																												effrayer
°exfridātu	°	exfridā́tu				250	phonét.	esfreed	Rol 438																														effrayé
exgrumāre		exgrumā́re				303	phonét.	esgruner																												‘égrener’
exiliu		exíliu				182.3, 191.2, 300	phonét.	eissil		,	essil		,	exil																									exil
exīre		exī́re				183.1, 300, 300.8	issir analogique	eissir		,	oissir		,	issir																						‘sortir’
exit		éxit	3s			179	phonét.	ist																												‘(il) sort’
exligere		exlígere				292	phonét.	eslire																															élire
°exmagāre	°	exmagā́re				105.2, 174, 271	phonét.	esmaier		,	esmaiier																									‘inquiéter, troubler’
°expandicāre	°	expandicāre				158, 175	phonét.	espanchier																															épancher
exparpiliāre		exparpiliā́re				158, 182.2, 260.3	variation	esparpeillier		,	esparpillier																												éparpiller
°experīmentāre	°	experīmentāre				158	phonét.	espermenter																															expérimenter
expiatiōne		expiatiṓne				288	emprunt au latin	expiacion																															expiation	[pj]
°explicitāre	°	explicitā́re				117.8, 183, 183.1	phonét.	espleitier		>	esploitier																												exploiter
explicitu		explícitu				117.5, 117.8	phonét.	esploit																															exploit
°exquartāre	°	exquartā́re				173	phonét.	escarter																															écarter
°exsaniāre	°	exsaniā́re				287	évolution retardée (diverses raisons)	essangier																															essanger
exsūcāre		exsūcā́re				128, 137, 148, 151, 322.3	phonét.	essuer		>	essuier																												essuyer
extempulō		extémpulō				335.4
exteras		éxteras				179.5	phonét.	estres																															aîtres		,	êtres
extinguere		extínguere				97.5	phonét.	esteindre																															éteindre
extrāneu		extrā́neu				179.5, 287	évolution retardée (diverses raisons)	estrange																															étrange
°exvigilāre	°	exvigilā́re				182	phonét.	esveillier																															éveiller
faba		fába				13, 206, 236, 308, 315, 319, 333	phonét.	feve																															fève
fabrica		fábrica				54, 93.1, 165.2, 193, 337.3b, 339, 343, 371	phonét.	forge		,	faverge																												forge
fabricāre		fabricā́re				337.3b , 343	variation	favrechier		,	favregier		,	favargier		,	forgier																						forger
fābula		fā́bula				244, 341	phonét.	fable																															fable
fac		fác	2s impér.			11.2, 13, 13.6, 125, 148.2, 209.5, 300.7, 306, 323.2, 327	phonét.	fai																															fais
°facēbam	°	facḗbam	1s imp			214.2	analogique	faiseie		,	faisoie																												(je) faisais
facere		fácere				53, 111, 112, 114, 114.2, 117, 139, 300, 346	phonét.	faire																															faire
facia		fácia				66, 97.1, 121, 283	phonét.	face		=	fache	pic																											face
faciēbat		faciḗbat	3s imp			276.1	perte irrégulière et ancienne de yod (ou i)	faisoit																															(il) faisait
faciente		faciénte	part. prés.			276.1	perte irrégulière et ancienne de yod (ou i)	faisant																															faisant
facile		fácile				84.1, 371	emprunt	facile																															facile
faciō		fáciō				335.1a
faciunt		fáciunt	3p			209.3, 244.1	chute précoce de la consonne intervocalique	font																															(ils) font
facta		fácta				10, 11.2, 14, 125, 137, 141.3, 149, 295, 300, 363	phonét.	faite																															faite
factiōne		factiṓne				300.8, 323.3	phonét.	façon																															façon
factu		fáctu				117.5, 365	phonét.	fait																															fait
factus		fáctus				335.1a
°facunt	°	fácunt				209.3, 244.1	chute précoce de la consonne intervocalique	font																															(ils) font
°fagīna	°	fagī́na				98	phonét.	faine																															faîne
°fagīna	°	fagī́na				98	phonét.	faine																															fouine
fāgu		fā́gu				93, 205, 209, 209.2, 234, 318, 322	phonét.	fo		,	fou		,	fau																						‘hêtre’
falce		fálce				112, 259.4	phonét.	fals		,	falz																												faux	instrument
falcōne		falcṓne				175, 220.1	phonét.	faucon																															faucon
falsu		fálsu				256, 291.4	phonét.	fals		>	faus																												faux	adj.
fame		fáme				12, 166.2, 208, 254, 307, 328.3, 331, 333	phonét.	fain																															faim
°fanga	°	fanga				105	phonét.	fange																															fange
fantagma		fantágma				223.3	phonét.	fantome																															fantôme
fantasma		fantásma		φάντασμα		259.6	phonét.
°fare-ayyo	°	fare-áyyo	fut 1s			235.3	variation	ferai																															(je) ferai
farīna		farī́na				221, 235.3	variation	farine		,	ferine																												farine
°farsuraceu	°	farsuráceu				292	phonét.	fastras																															fatras
°fascellu	°	fascéllu				181	variation	faisel		,	faissel		,	faisseaux	pl	,	faissiaux	pl																					faisceau
fascia		fáscia				140, 283	phonét.	faisse																															fasce
fascināre		fascinā́re				303	phonét.	faisnier																															fasciner
fata		fáta				204.1	phonét.	fee																															fée
°fatidu	°	fátidu				259	phonét.	fade																															fade
°fātūtu	°	fātū́tu				222.3, 240, 384.iii	irrégulier	feu	[fəy]																				feu										feu	‘défunt’
favōre		favṓre				319.4	emprunt (au latin)	favor																															faveur
febre		fébre				54, 333, 334, 340	phonét.	fievre																															fièvre
februāriu		februā́riu				289.7	phonét.	fevrier																															février
fecerat		fecerát	3s fut			117.7	phonét.	fedre	Pass 188, 372																														(il) fera
fēcī		fḗcī	1s pf			213.2, 224.3	ē > ī sous l'influence du -i final	fis																															(je) fis
fēcit		fḗcit	3s pf			112, 213.2, 224.3	ē > ī sous l'influence du -i final	fist																															(il) fit
fel		fél				152.2, 210, 310, 329	phonét.	fiel																															fiel
fēmina		fḗmina				291.3, 301.1, 367, 388	phonét.	feme	[fãmə]	,	femme																		femme										femme	f[a]mme
°femita	°	fémita				210, 212.1	phonét.	fiente																															fiente
°femu	°	fému				211, 212.1	phonét.	fien		,	fiem		,	fiens																						‘fumier’
°fēnāre	°	fēnā́re				241.1	variation	fener		,	faner																												faner
fenestra		fenéstra				176, 241	phonét.	fenestre																															fenêtre
fēnu		fḗnu	lc			241.1	variation	fener		,	faner																												faner
fēnu		fḗnu				215.1	foin non phonétique	fein		,	foin																												foin
fēnuculu		fēnúculu				300, 335.2, 346	phonét.	fenoil																															fenouil
feretru		féretru				59, 67, 85, 210, 348.3, 370, 371	phonét.	fiertre																												‘châsse’
feretrum		féretrum				335.1a
fēria		fḗria				183, 284	phonét.	foire																															foire
fēriāta		fēriā́ta				183	phonét.	feirié		,	foirié																												férié
°ferīrat	°	ferīrát	3s fut			292	phonét.	ferra																															(il) férira
ferrātu		ferrā́tu				182	phonét.	ferre																															ferré
ferrea		férrea				177	phonét.	fierges		,	ferges																									‘entraves’
ferreāre		ferreā́re				284	phonét.	fergier																												‘enchaîner’
ferru		férru				176	phonét.	fer																															fer
feru		féru				16, 32, 69.2, 90, 210, 331, 350	phonét.	fier		,	fer																												fier
°ferūtu	°	ferū́tu	cf. ferīre			222.1	phonét.	feru																															féru
°fētōne	°	fētṓne				220.2	analogique	feon																															faon	[fɑ̃]
fētu		fḗtu	lc			220.2	analogique	feon																															faon	[fɑ̃]
fevu		févu				317.1	variation	fieu		,	fief																												fief
fībula		fī́bula	lc			248.1	influence labiale	afuble																															(il) affuble
°ficatu	°	fícatu				270.2	variation	feie		>	foie		,	fie																									foie
fīcātu		fīcātu	lc			148.3, 270.2, 288	phonét.	fidie		,	firie	Rol278	,	fire		,	fege																			‘foie’
fīcātu		fīcā́tu	lc			270.2	variation	feie		>	foie		,	fie																									foie
°fidāle	°	fidā́le				206.8, 213.8	phonét., feel repose sur °fidāle, feeil et feoil sur fidēle	feeil		,	feoil		,	feel																									fidèle		,	féal	suff. -al
fide		fíde				213, 254, 264, 306, 311, 320.2, 350, 354	phonét.	fei		>	foi		,	feit		,	feið		,	fwe	,	fai															faith	angl	foi
fidēle		fidḗle				206.8, 213.8	phonét., feel repose sur °fidāle, feeil et feoil sur fidēle	feeil		,	feoil		,	feel																									fidèle		,	féal	suff. -al
figmentu		figméntu				300	phonét.	fiment																												‘matière’
fīlāre		fīlā́re				224.2	analogique	filer																															filer
fīlat		fī́lat	3s			224.2	phonét.	file																															(il) file
fīlia		fī́lia				283	phonét.	fille																															fille
°filicāria	°	filicā́ria				184.4	fouchiere et fougiere dialectaux	feugiere		,	fouchiere		,	fougiere																									fougère
°fīlicella	°	fīlicélla				191.1, 365	phonét.	ficelle		,	filcele		>	ficele																									ficelle
fīliolu		fīlíolu				87, 216.4	phonét.	filluel		,	filleul																												filleul
fīliolum		fīlíolum				369																														‘filleul’
fīlius		fī́lius	nom sg			191.1, 291.5, 302, 356, 373, 374, 380		fil	CRs, [ʎ]	,	fils	CSs	,	filz	CSs, CRp	,	fiz	CSs, CRp	,	fis									fils										fils	[fis]
°fīljolu	°	fīljólu				87, 216.4	phonét.	filluel		,	filleul																												filleul
fīlu		fī́lu				224.2, 356	phonét.	fil	[l]	,	fis	pl																								‘cordon de textile’			fil
°fimāre	°	fimā́re				248.1	influence labiale	femer		>	fumer																									‘amender une terre’
°fimāriu	°	fimā́riu				248.1	influence labiale	femier		>	fumier																												fumier
°fīmita	°	fī́mita	dérivé de fimu			210, 212.1	phonét.	fiente																															fiente
fimu		fímu				211, 212.1	phonét.	fien		,	fiem		,	fiens																						‘fumier’
findere		fíndere				184, 250	phonét.	fendre																															fendre
fīne		fī́ne				221, 291.5	phonét.	fin	CRs	,	fins	CRp																											fin	nom
fingebat		fíngebat	3s imp			97.4	phonét.	feignoit																															(il) feignait
fingere		fíngere				184, 349	phonét.	feindre																															feindre
fīnīre		fīnī́re				221.3, 224.2	finir analogique	fenir		,	finir																												finir
firmāmente		firmāménte				236.1	phonét.	fermement																															fermement
firmāre		firmā́re				182	phonét.	fermer																															fermer
fiscella		fiscélla				183	phonét.	feissele		,	foissele																												faisselle
fissa		físsa				182	phonét.	fesse																															fesse
fistula		fístula				68	non-phonétique	festre		,	festle		,	fesle		,	feste																						fistule
°fiticu	°	fíticu				148.3, 270.2, 288	phonét.	fidie		,	firie	Rol278	,	fire		,	fege																			‘foie’
flaccidu		fláccidu				112	phonét.	flaistre																															flétri
°flado	°	flado	g			220.2, 235.4	phonét.	flaon																															flan	[flɑ̃]
°fladōne	°	fladṓne				220.2, 235.4	phonét.	flaon																															flan	[flɑ̃]
flage		flage	m. bas all.			254.1	phonét.	flage		,	flaige																									‘champ’
flagellu		flagéllu				97, 98, 104, 122, 148, 281	variation	flaiel		,	flael																												fléau
°flāgrāre	°	flāgrā́re				207, 346, 350.4	phonét.	flairier																															flairer
flāgrat		flā́grat	3s			346	phonét.	flaire																															(il) flaire
flamma		flámma				166.2, 334, 348, 388	phonét.	flame																					flamme										flamme
flāvu		flā́vu				209	phonét.	flo		,	flou																												flou
flēbile		flḗbile				340.3, 341.2	variation	fevle		,	fieble		,	feble		,	foible																						faible
flōre		flṓre				74.2, 219, 333, 359, 365	phonét.	flour		,	fleur		,	flur	Rol2431	,	flor																						fleur
Floriācu		Floriā́cu				207.1c	phonét.	Fleury																															Fleury
flūmen		flū́men				222.5	phonét.	flum		,	flun																									‘fleuve’
fluviu		flúviu				288	emprunt au latin	fluevie		,	fluive		,	flueve																									fleuve
focāciu		focā́ciu				322	phonét.	foace																															fouace
focu		fócu				218, 365	phonét.	fou		,	fu		,	feu																									feu
°fodiculāre	°	fodiculā́re				243.2	variation	foeillier		,	fooillier																												fouiller
°fodr	°	fodr	frk			344, 344.4	variation	fuere		,	feure		,	fuerre		,	feurre																						feurre	‘foin’	,
foetu		fóétu				220.2	analogique	feon																															faon	[fɑ̃]
folia		fólia				36, 66, 121, 137, 171, 187, 283	phonét.	fueille		,	foille																												feuille
foliu		fóliu				187	phonét.	fueil		,	foil																									‘feuille’
folla		fólla				185.1, 307.3, 363	analogique	fol	masc.	,	folle	fém.																											fou		,	folle
folle		fólle				185.1, 307.3, 363	analogique	fol	masc.	,	folle	fém.																											fou		,	folle
fontāna		fontā́na				359		funtaine		>	fontaine																												fontaine
forasticu		forásticu				67, 272	phonét.	forasche																															farouche
foreste		foréste				176, 303	phonét.	forest																													forest	angl	forêt
forfice		forfice				67, 258	phonét.	force																												‘ciseaux’			forces	pl
°fōria	°	fṓria				189.3	étymologie incertaine	foire																												‘diarrhée’
formāticu		formā́ticu				272, 358	phonét.	formage		>	fromage																												fromage
formicāre		formicā́re				271.1	syncope retardée	formiier																															fourmiller
°formīcāria	°	formīcā́ria				174.2, 268.1, 271.1	syncope retardée	formiiere		,	fourmiiere																												fourmilière
fors + °bibūtu		fors + °bibū́tu				222.1	phonét.	fourbeu	cf. forboire ‘boire avec excès’																														fourbu
°fortaricia	°	fortarícia				236	phonét.	forterece																															forteresse
forte		fórte				264.4, 291.5, 313.1, 356, 373	phonét.	fort		,	forz																												fort
fortia		fórtia				139, 139.1	phonét.	force																															force
°fortiāre	°	fortiā́re				29, 30, 66, 67, 67.5, 264.1, 276, 278, 282, 284	phonét.	forcier																															forcer
fortīmente		fortīménte				236.1, 291.5	fortement analogique	forment		,	fortement																												fortement
fortior		fórtior				251	phonét.	fortre	CSs																											‘plus fort’
fortūna		fortū́na				222	phonét.	fortune																															fortune
fragile		frágile				105.4, 371	fragile emprunt	fraisle		,	fraile		,	fragile																									frêle		,	fragile
fragōre		fragṓre				240, 322	phonét.	freor		,	freour		,	freeur		,	freur																						frayeur	réfection
frāgrāre		frāgrā́re				207, 346, 350.4	phonét.	flairier																															flairer
Francia		Fráncia				283	phonét.	France																															France
franciscu		francíscu				264.7, 350.3, 385	phonét.	franceis		,	françois																		français										français
frātre		frā́tre				225.1, 333, 334, 344, 344.1, 348, 354, 370	phonét.	fradra	Serm	,	fradre	Serm	,	freðrə		>	frere																						frère
fraxinu		fráxinu				67, 258	phonét.	fraisne																															frêne
fremitu		frémitu				210	phonét.	friente																												‘vacarme’
frēnu		frḗnu				215	phonét.	frein																															frein
frictiōne		frictiṓne				300.8	phonét., variation	friçon																															frisson
frīgere		frī́gere				300	phonét.	frire																															frire
frīgida		frī́gida				97.2, 117.6, 252.1, 256, 326, 350.2	phonét.	freit		>	froit		,	froide	fém.	,	frida	fém., Pompéi	,	froid	>	fret																	froid
°frigidāre	°	frigidā́re				270	phonét.	froidier																												‘refroidir’
frīgidu		frī́gidu				97.2, 117.6, 252.1, 256, 326, 350.2	phonét.	freit		>	froit		,	froide	fém.	,	frida	fém., Pompéi	,	froid	>	fret																	froid
frīgorōsu		frīgorṓsu				322	phonét.	friulos																															frileux
frisca		frísca				264.7, 350, 363	phonét.	fresche	fém.	,	freis	masc.	,	frois		>	frais																						frais		,	fraîche
°friscu	°	fríscu				264.7, 350, 363	phonét.	fresche	fém.	,	freis	masc.	,	frois		>	frais																						frais		,	fraîche
°frisk	°	frisk	g			264.7, 350, 363	phonét.	fresche	fém.	,	freis	masc.	,	frois		>	frais																						frais		,	fraîche
°friþu	°	friþu	g			128, 320, 348	phonét.	esfreer	Rol	,	esfreier																												effrayer
frūctu		frū́ctu				192, 365	phonét.	fruit																															fruit
frūmentu		frūméntu				224.2, 243	phonét.	froment		,	frument																												froment
fugio		fúgio	1s			172	phonét.	fuis																															(je) fuis
fūgīre		fūgī́re				98, 148, 379	phonét.	foir																					fuir										fuir
fugitīvu		fugitī́vu				105.4	fugitif emprunt	fuitif		,	fugitif																												fugitif
fui		fúi	1s pf			222.2	phonét.	fui																															(je) fus	anal.
°fūi	°	fū́i				222.2	phonét.	fui																															(je) fus	anal.
°fulgere	°	fúlgere				104, 113.3, 116.1, 139, 139.2, 140.1, 251, 329, 349	variation	foildre		,	foldre		,	foudre																									foudre
fulgur		fúlgur	neutre			104, 113.3, 116.1, 139, 139.2, 140.1, 251, 329, 349	variation	foildre		,	foldre		,	foudre																									foudre
fūmāre		fūmā́re				224.2	analogique	fumer																												‘dégager de la fumée’
fūmigāre		fūmigā́re				271	phonét.	fungier																												‘fumer’
fūmu		fū́mu				224.2	analogique	fum																												‘fumée’
°fūnāmen	°	fūnā́men				224.2	analogique	funain																															funin
fundibalu		fundíbalu				342.1	réaction contre vl	fondefle																												‘très grande fronde’
fūnu		fū́nu				224.2	phonét.	fun																												‘corde’
°furbjan	°	furbjan	g			221.3	phonét.	forbir		,	fourbir																												fourbir
°fūriōne	°	fūriṓne				284	phonét.	fuiron																															furet
furunculu		furúnculu				349	phonét.	furoncle																															furoncle
fuscina		fúscina				67, 112	phonét.	foisne																												‘trident’
fūsiōne		fūsiṓne				224.3	variation	fuison		,	foison																												foison
fūste		fū́ste				72	phonét.	fust																															fût
°futtūtu	°	futtū́tu				222.1	phonét.	foutu																															foutu
futūtu		futū́tu	lc, cf. futuere			222.1	phonét.	foutu																															foutu
°gabaiti	°	gabaiti	frk			319.7	phonét.	gibier																															gibier
gabata		gábata	lc			173, 237	phonét.	jatte		,	jate		,	gate																									jatte
°gabella	°	gabélla				239	phonét.	gevele		,	javele																												javelle
gabida		gábida	attesté (TLFi)			173, 237	phonét.	jatte		,	jate		,	gate																									jatte
°gabita	°	gábita				173, 237	phonét.	jatte		,	jate		,	gate																									jatte
gaiu		gáiu				119, 148	phonét.	jai																															geai
gaju		gáju				119, 148	phonét.	jai																															geai
galbinu		gálbinu				28, 29, 29.1, 33, 67, 105, 258, 293.2, 356, 371	phonét.	jalne																															jaune							gaubi	gasc
galīna		galī́na				239	phonét.	geline																															géline
°galīre	°	galī́re				239	phonét.	jalir																															jaillir
Gallaecia		Galláécia				176.1	savant	Galice																															Galice
°gallos	°	gallos	celt ‘caillou’			105.5	emprunt au celt	gal																															galon		,	galet
gamba		gámba				14, 105, 107, 173.1, 295, 301, 307	phonét.	jambe																															jambe
Gamundias		Gamundias				286	phonét.																																Gemonges	Wall.
°garba	°	gárba				105, 173.2	variation	jarbe		,	gerbe																												gerbe
garƀa		garƀa	frk			105, 173.2	variation	jarbe		,	gerbe																												gerbe
gard		gard				105	phonét.	jardin																															jardin
gariofilu		gariófilu		καρυόφυλλον		238, 239, 334, 342	phonét.	gerofle		,	girofle																												girofle
°garofilu	°	garófilu		καρυόφυλλον		238, 239, 334, 342	phonét.	gerofle		,	girofle																												girofle
gaudia		gáúdia				70.1, 147, 148, 193, 281, 365	phonét.	joie																															joie
°gaudiōsu	°	gaudiṓsu				224	phonét.	joyeux																															joyeux
gaudīre		gaudī́re				247	phonét.	joir		,	jouir																												jouir
°gauta	°	gáúta				223	phonét.	joue																															joue
gelu		gélu				152.2, 210, 350	phonét.	giel		>	gel																												gel
gemellu		geméllu				248.1	influence labiale	gemel		,	gemeau		>	jumeau																									jumeau
gemere		gémere				211, 211.1	analogique	giembre																															geindre
generu		géneru				250	phonét.	gendre																															gendre
genetrīx		génetrīx				335.1a
genitor		génitor				335.1a
genitu		génitu				252.1, 256	phonét.	gent																															gent	adj.
gente		génte				97, 104, 281	phonét.	gent																															gent
genuculu		genúculu				97, 334, 339, 346	phonét.	genoil		,	genouil																												genou
Georgiu		Geórgiu				276, 280, 281	phonét.	Jorges																															Georges
germāna		germā́na				208.1	phonét.	germain		,	germaine																												germain		,	-aine
germānu		germā́nu				208.1	phonét.	germain		,	germaine																												germain		,	-aine
germināre		germinā́re				291.3	phonét.	germer																															germer
°gēro	°	gēro	frk			105, 107, 109.5	phonét.	giron																															giron
°gibb	°	gibb				105	phonét.	gibet																															gibet
gīgeriu		gīgériu				97	phonét.	gisier																															gésier
°gilda	°	gilda				105	phonét.	gelde																															guilde
°gincīva	°	gincī́va				97, 184	phonét.	gencive																															gencive
°glacia	°	glácia				2.2, 94, 95, 96, 139, 139.4, 150, 277, 283, 300.2	phonét.	glace																															glace
°gladjolu	°	gladjólu				216.4	phonét.	glaiol		,	glaieus																												glaïeul
glānde		glā́nde				333, 334, 349	phonét.	glant																															gland
glārea		glā́rea				174.2	phonét.	glaire																												‘gravier’
glāria		glā́ria				174.2	phonét.	glaire																												‘gravier’
°glēnāre	°	glēnā́re				241.1	variation	glener		,	glaner																												glaner
glīre		glī́re	lc			224.2	(g)liron analogique	gliron		,	liron		,	gleron		,	leron																			‘lérot’
glis‑		glis‑	celt			350	variation, action de la norme	gloise		>	glaise																												glaise
gloria		glória				66.3, 137, 149.1, 151, 288, 288.1, 350, 371	emprunt au latin	glorie		>	gloire		,	glore																							glory	angl	gloire
glōriōsu		glōriṓsu				66.5	savant	glorios		,	glorieux																												glorieux
°glōsa	°	glṓsa				296.5	phonét.	glose																															glose
glōssa		glṓssa				296.5	phonét.	glose																															glose
glūte		glū́te				222	phonét.	glu																															glu
gōbiōne		gōbiṓne				285	phonét.	goujon																															goujon	poisson
gomphu		gómphu				264.4	phonét.	gon																															gond
°Gornācu	°	Gornā́cu				318.2	phonét.	Gornai	Seine-Maritime																														Gournay
gracile		grácile				29, 30, 30.2, 67, 101.1, 112, 112.1, 114, 228, 258, 300, 346	phonét.	graisle																															grêle	‘fin’
Graecia		Gráécia				176.1	forme en i savante	Grece		,	Grice																												Grèce
graecu		gráécu				212, 213.5, 228, 311, 318	ae > ɛ cas général	grieu		,	griu	< pic ?																											grec
grammatica		grammática				148.3, 288, 288.2, 299.2, 303.2, 303.3	emprunt au latin	gramaire																															grammaire
grāna		grā́na				333, 334, 367	phonét.	graine																															graine
grānāriu		grānā́riu				235.3	variation	grenier																															grenier
grande		gránde				264.4, 313.1, 395	phonét.	grant	[grãnt]																														grand	[grã]
grandīmente		grandīménte				236.1	grandement analogique	granment		,	grandement																												grandement
grandior		grándior				175, 251, 281	phonét.	graindre	CSs																											‘plus grand’
°grania	°	gránia	étymon de gragne?			267, 268, 268.3, 271, 271.3, 271.5	variation	granche		,	grange		,	gragne																									grange
°granica	°	gránica	étymon de granche, grange			267, 268, 268.3, 271, 271.3, 271.5	variation	granche		,	grange		,	gragne																									grange
graphiu		gráphiu				288	emprunt au latin	grafie		,	graife		,	grafe																									greffe
Gratianopolis		Gratianópolis				341	phonét.																																Grenoble
grātu		grā́tu				306, 311	phonét.	gret		,	gré																												gré
gravāre		gravā́re				235.3	variation	grever																															grever
°greve	°	gréve				350, 351	phonét.	grief		,	gref																												grief
°grōdi	°	grōdi	frk			286	phonét.	gruier																															gruyer
°grōdjariu	°	grōdjáriu				286	phonét.	gruier																															gruyer
°grossia	°	gróssia				189.3, 284	phonét.	groisse																												‘grosseur, grossesse’
grossu		gróssu				314, 349	phonét.	gros																															gros
gruniu		grúniu				134, 331.2	phonét.	groing		,	groin																												groin
°Gualla	°	Guálla				345.5	obscur	Gaule																															Gaule
°gubbu	°	gúbbu				255.2	phonét.	gobe																												‘engourdi’
gubernāculu		gubernā́culu				175.4, 182	phonét.	governail		,	gouvernail		,	gouvernaux	pl																								gouvernail
gula		gúla				12, 219, 264, 333, 359	phonét.	gole		,	goule		,	goul		,	gueule																						gueule
°gundfano	°	gundfano	frk			67	phonét.	gonfanon																															gonfalon
gurga		gúrga	attesté 6e siècle DEAF			67, 97, 188, 381	phonét.	gort		,	gorge																		gorge										gorge
gurgite		gúrgite				67, 97, 188, 381	phonét.	gort		,	gorge																		gorge										gorge
gutta		gútta				264.6, 296	phonét.	gote																															goutte
gutturiōne		gutturiṓne				158.2	chute précoce de l’atone prétonique	goitron																												‘gorge’
°gwerre	°	gwérre				97.5, 264, 264.2, 275	phonét.	guerre																															guerre
habent		hábent	3p			209.3, 244.1	chute précoce de la consonne intervocalique	ont																															(ils) ont
habeo		hábeo	1s			285.2	chute précoce de la labiale	ai																															(j’) ai
°haberat	°	haberát	3s fut			343	phonét.	aura		,	avra																												(il) aura
habēre		habḗre				213.4, 235, 264.3, 350.3	phonét.	aveir		>	avoir		>	avar																									avoir
habes		hábes	fut 2s			206.5	analogique	-as																															-as
habes		hábes	2s			206.4	analogique	as																															(tu) as
habet		hábet	fut 3s			206.5	analogique	-at																															-a
habet		hábet	3s			206.4	analogique	a																															(il) a
habuit		hábuit	3s pf			289.4	consonification retardée	out																															(il) eut
°habūtu	°	habū́tu				222.1, 240	phonét.	eu																															eu	[y]
°hac hōra	°	hac hṓra				219.4	phonét.	ore		,	ores		,	or																									or
Haimrīk		Haimrīk	frk			291, 292.5	irrégulier	Henri																															Henri
halsberg		halsberg	frk			67, 374	phonét.	osberc		,	osbercs		,	haubert																									haubert
°hāppja	°	hāppja	frk			264, 264.3, 285, 285.3	phonét.	hache		>	ache																												hache							apcha	gasc
°hardjan	°	hardjan	frk			264.3	phonét.	hardi		>	ardi																												hardi
°harja	°	harja	frk			119.2, 174.2, 286	phonét.	haire																															haire
hasta		hásta				175.5, 264.3	savant, h aspiré reflète le caractère étranger du mot ?	haste																												‘lance’			haste
°hatīna	°	hatī́na				235.4, 384.iii	phonét.	haine																					haïne										haine
°hatīre	°	hatī́re				221.3, 235.4, 264.3, 320	phonét.	hair																															haïr
°hatjan	°	hatjan	frk			221.3, 235.4, 264.3, 320	phonét.	hair																															haïr
°hatjan	°	hatjan	frk			235.4, 384.iii	phonét.	haine																					haïne										haine
°hauh	°	hauh	frk			264.3	croisement																														hoch	nha [hōχ] ‘haut’	haut
°hauwa	°	hauwa	g			223, 223.4	phonét.	hoe		,	houe																												houe
°hauwa + -ellos	°	hauwa + -éllos	acc pl			181.1, 247	variation	hoel		,	houel		,	hoyaux	pl																								hoyau
°hauwa + -ellu	°	hauwa + -éllu	g, acc sg			181.1, 247	variation	hoel		,	houel		,	hoyaux	pl																								hoyau
havene		hávene	g			68.2	substitution de sonante	havre		,	havle		,	hafne		,	havene																						havre
hebræu		hébræu				212, 212.4, 350	phonét.	ebrieu		,	hebreu		,	ebriu	< pic ?																								hébreu
hedera		hédera				335.2, 344.4, 350.1	variation	ierre		,	edre	TL 1289 : 3, 6	,	eedre	TL 1289 : 6	,	airre	TL 1290 : 4											lierre										lierre							edera	it
°helm	°	helm	frk			181, 259, 291, 370, 372.1	phonét.	helme		,	elme		,	eaume		,	hiaume																						heaume
helmu		hélmu	attesté gloses de Reichenau, 8e siècle			181, 259, 291, 370, 372.1	phonét.	helme		,	elme		,	eaume		,	hiaume																						heaume
herba		hérba				7, 12, 32, 33, 91, 170, 176, 264	phonét.	erbe		,	herbe																												herbe
herbāticu		herbā́ticu				272	phonét.	erbage																															herbage
°herda	°	herda	g			176.2	variation	herde		,	harde																									‘troupe de bêtes’
hērēditāre		hērēditā́re				241.2	dissimilation	ireter		,	eriter																												hériter
heri		héri				210, 242, 350.1	variation	hier		,	ier		,	er	entrée TL																								hier
°heriberga	°	heribérga				269	phonét.	herberge																															auberge
hernia		hérnia				29.1, 130, 176, 264.3, 278, 283	emprunt ?	hergne																															hernie
hērōs		hḗrōs	lc			264.3	emprunt																																héros
°hester	°	hester	frk			264.3	phonét.	hestre																															hêtre
hībernu		hībérnu				224.2, 241.2	analogique	hiver		,	iver																												hiver
Hieronymu		Hierónymu				291.3	phonét.	Jerome																															Jérôme
hilaris		hílaris		ἱλαρός	‘joyeux’	237	variation	ilaire																															hilare
hilarus		hílarus		ἱλαρός	‘joyeux’	237	variation	ilaire																															hilare
hilerus		hílerus		ἱλαρός	‘joyeux’	237	variation	ilaire																															hilare
°hinc ad hōram	°	hinc ad hṓram				219.4	phonét.	encore		,	ancor		,	encor		,	d’ore en avant																						ores	d’ores et déjà	,	or		,	dorénavant
°hinc hac hōra	°	hinc hac hōra				219.4	phonét.	encore		,	ancor		,	encor		,	d’ore en avant																						ores	d’ores et déjà	,	or		,	dorénavant
hinnīre		hinnī́re				264.3	h aspiré représente l'emphase ?	henir		>	hennir																												hennir
hirpice		hírpice				182, 258, 258.1, 259.4, 264.3, 273	h aspiré représente l'emphase ?	herce		,	herse																												herse
°hirunda	°	hirúnda				241.1	variation	aronde																															aronde
hirundine		hirúndine	lc			241.1	variation	aronde																															aronde
hīspidōsu		hīspidṓsu				303	phonét.	hisdos																													hideous	angl	hideux
historia		história				288, 288.1	emprunt au latin	estorie		,	estoire		,	estore																							story	angl	histoire
°Hlamika	°	Hlamika	frk			264.3	phonét.																																Clamecy	Nièvre
°hlao	°	hlao	frk			264.3	phonét.	flou																												‘tiède’	lau	nha
°Hluþawic	°	Hluþawic	frk			52.2, 264.3, 319.7	phonét.	Cloevis		>	Clovis																												Clovis
°Hluþawic	°	Hluþawic	frk			52.2, 264.3	phonét.	Lodhuuicus	Serm	>	Lodovis		>	Loois																									Louis
°hnap	°	hnap	frk			264.3	phonét.	hanap																												‘écuelle’	Napf	nha
homicīdiu		homicī́diu				288	emprunt au latin	omecide		,	omecire																												homicide
homine		hómine				256.2, 291.3, 367, 371	variation	home		,	ome		,	homme		,	om																						homme
homo		homo	nom sg, atone (proclitique)			217, 264.3, 367	phonét.	om		,	on																												on	pronom
homo		hómo	nom sg, tonique			217, 367	phonét.	huem	CSs	,	uem	CSs																								‘homme’
honōre		honṓre				245	phonét.	onor		,	enor																												honneur
hōra		hṓra	base de divers composés			10, 13, 150, 219, 219.4, 309, 325	phonét.	ore		,	oure		,	eure																									heure
hordeu		hórdeu				150, 264.3, 276, 278.3, 280, 281	phonét.	orge																															orge
horidu		hóridu				252.1	phonét.	ort																												‘répugnant’
horribile		horríbile				68	substitution de sonante	orribre		,	orrible																												horrible
hospitāle		hospitā́le				206.8, 303	phonét.	ostel																													hostel	angl	hôtel
hospite		hóspite				169, 185, 242, 258, 258.1, 303	phonét.	oste		>	hôte																										host	angl	hôte
hoste		hóste				256, 258.1	phonét.	ost																												‘armée’
hostēs		hóstēs	acc. pl			67.7, 144.4, 264.7	phonét.	oz	CRp																											‘troupe, armée’
°hōstia	°	hṓstia				189.3	étymologie incertaine	oiste		,	oite																												hostie	empr.
°hrok	°	hrok	frk			264.3	phonét.	froc																												‘jupe’	Rock	nha	froc
°Hrotland	°	Hrotland	frk			345	phonét.	Rolland																															Roland
°hruslo	°	hrúslo				291, 292.1	phonét.	frelon																					freslonniere	15e s.	,	freslon	16e s.						frelon
°hū‑āre	°	hū‑ā́re				128	phonét.	huer		,	huier																												huer
hūba		hūba	frk			319.7	phonét.	huve																												‘bonnet’
Hūgo		Hūgo	frk			322.4	phonét.	Hue
humile		húmile				292	phonét.	umble																															humble
humiliāre		humiliā́re				288	emprunt au latin	umelier																															humilier	[lj]
°hurslo	°	hurslo	frk			291, 292.1	phonét.	frelon																					freslonniere	15e s.	,	freslon	16e s.						frelon
-īa		-ī́a		-ία		221.5	phonét.	-ie	cf. felonie																														-ie
-iācu		-iā́cu				207.1c	phonét.
ibi		ibi				356		iv		>	i		,	y																									y
idolu		ídolu				68.2, 371	substitution de sonante	idre		,	idle		,	idele		,	idre																			‘idole, dieu païen’			idole
illāc		illāc				327, 327.1	phonét.	ilai	tonique	,	lai	tonique	,	la	atone																								là
illoc		illóc				310, 327	phonét.	iluec		,	luec																									‘là’
illōrum		illṓrum	poss. 3p invar. 3p pr. pers.			219.3	phonét.	lor		,	lur		,	leur																									leur		,	leurs
illos		íllos				184	phonét.	eus																															eux
im+plicat		im+plícat	3s			84.2	phonét.	emploie																															(il) emploie
imagine		imágine				371, 371.1		imagene	Psautier d'Oxford	,	image																										image	angl	image
°im‑blādāre	°	im‑blādā́re				320, 348	phonét.	emblaer																															emblaver
imbūtu		imbū́tu	cf. imbuere			222.1	phonét.	embu																															embu
°impastōriāre	°	impastōriā́re				158.2, 207, 284	chute précoce de l’atone prétonique	empaistrier																															empêtrer
°impejjōrāre	°	impejjōrā́re				183, 183.1, 244	empirer analogique	empeirier		,	empoirier																												empirer
implicāre		implicā́re				184.1	phonét.	empleier		,	emploier																												employer
°imprūmūtuāre	°	imprūmūtuā́re				192.1	phonét.	emprunter																															emprunter
imputāre		imputā́re				184.1	phonét.	enter																															enter
in		in				307, 328.2	phonét.	en																															en	prép.
incantāre		incantā́re				175	phonét.	enchanter																															enchanter
inclīnāre		inclīnā́re				67, 349	phonét.	incliner																															incliner
inde		inde				356		ent		>	en																												en	pron.
infante		infánte				184	phonét.	enfant																															enfant
īnfernu		īnférnu				12, 184, 264, 333	phonét.	enfer		,	enfern																												enfer
inficere		infícere				237
inflāre		inflā́re				67, 184.1, 348	phonét.	enfler																															enfler
ingeniu		ingéniu				97, 178.1	probablement dialectal	engien		,	engin																												engin
°ingreviat	°	ingreviat	3s			177	phonét.	engriege																												‘il accable’
inguen		ínguen	lc			182.7	phonét.	eigne	[eɲə]																														aine	[εnə]
°inguine	°	ínguine				182.7	phonét.	eigne	[eɲə]																														aine	[εnə]
inhortāre		inhortā́re				188	phonét.	enorter																												‘informer’
injungere		injúngere				190	phonét.	enjoindre																															enjoindre
inodiāre		inodiā́re				148, 189	phonét.	enoiier		,	enoier																												ennuyer
inraucāre		inraucā́re				292.4	phonét.	enroer																															enrouer
°inrevere	°	inrévere				292.4, 339, 342	phonét.	enrievre																												‘dissolu, adonné au plaisir’
insignia		insígnia				283, 383	phonét.	enseigne																					enseigne										enseigne
insimul		insímul				68, 68.1, 227, 251, 292, 329	substitution de sonante	ensembre		,	ensemble																												ensemble
īnstāmente		īnstāménte				236.1	MF analogique	instamment		>																			instantement										instamment
instrūmentu		instrūméntu				250.3	influence labiale ?	estroment		,	estrument																												instrument
īnsula		ī́nsula				12, 191, 288.2, 292, 299.2, 303.2	phonét.	isle		=	idle	anglo-norm, [iðle]																											île
integru		íntegru				85, 85.1, 86, 179.3, 335, 346, 371	entier réfection sur suffixe -ier	entir		,	entier																									‘sincère, pur’			entier
integru		íntegru				85, 86, 335, 371	phonét.	entre																												‘en bonne forme’			entre
integru		intégru				85, 85.1, 86, 179.3, 335, 346, 371	entier réfection sur suffixe -ier	entir		,	entier																									‘sincère, pur’			entier
integrum		íntegrum				335.1a
inter		ínter				184, 251	phonét.	entre	prép.																														entre	prép.
Interamnus		Interámnus				291.3	phonét.	Entrammes	Mayenne																														Entrammes	Mayenne
interrogāre		interrogā́re				182, 184.1, 317.3	phonét.	enterver																															interroger	emprunt
°intortiliāre	°	intortiliāre				158	phonét.	entorteillier																															entortiller
intro		intro	1s			250	phonét.	entre																															(j')entre
invidia		invídia				288	emprunt au latin	envidie		,	envie		,	envirie		,	envire																						envie
invitiāre		invitiā́re				174.1	phonét.	envoisier																												‘(se) divertir’
involāre		involā́re				289.1, 292.7	phonét.	embler																															embler
-iolu		-íolu				216.4	phonét.	-uel		,	-eul																												-eul
īra		ī́ra				221	phonét.	ire																															ire
-īre		-ī́re	inf			221.3, 380	phonét.	-ir																					-ir										-ir	inf
-īre		-ī́re				221.3, 380	phonét.	-ir																					-ir										-ir	inf
Isara		Ísara				237	variation	Oise																															Oise
Isera		Ísera				237	variation	Oise																															Oise
iterāre		iterā́re				344, 344.6	phonét.	errer																															errer
iterat		íterat	3s			344, 344.6	phonét.	eire																															(il) erre
-itia		-ítia				183.3, 283.6	seul -eise est populaire	-eise		,	-ise		,	-ece		,	-ice		,	-oise																			-ese		,	-ece		,	-ise, -oise
iūniu		iū́niu				134, 192.2, 274, 291.5, 367, 387	phonét.	juin	CRs	,	juinz	CSs																	juin										juin
-īva		-ī́va				221.4	phonét.	-if		,	-ive																												-if		,	-ive
-īvu		-ī́vu				221.4	phonét.	-if		,	-ive																												-if		,	-ive
jacēre		jacḗre				119, 274	phonét.	gesir		,	jesir																												gésir
jacet		jácet	3s			207.1b	phonét.	gist																															(il) gît
jactāre		jactā́re				300.8, 323.3	phonét.	getier																															jeter
jam		jám				119, 206.4, 307.2, 313.2, 328.3	phonét.	ja																					jadis										déjà		,	jadis		,	jamais
-jan		-jan	g			221.3, 380	phonét.	-ir																					-ir										-ir	inf
°jangalōn	°	jangalōn	frk			119.2, 274	phonét.	jangler																												‘plaisanter, bavarder’
jānuāriu		jānuā́riu				289	phonét.	jenvier																															janvier
°jehhjan	°	jehhjan	frk			264.3, 274, 315.2	phonét.	jehir																												‘avouer’
jējūnu		jējū́nu				222	phonét.	jeun		,	jun																												(à) jeun
°jenīcia	°	jenī́cia				224.4	phonét.	genice																															génisse
°jeniperu	°	jeníperu				224.4	phonét.	genoivre																															genièvre
°jocāle	°	jocā́le	acc sg			128, 181.1, 243.2, 322	analogique	joel		,	juel		,	jouel		,	joiaus	pl	,	joiel																			joyau
°jocāles	°	jocā́les	acc pl			128, 181.1, 243.2, 322	analogique	joel		,	juel		,	jouel		,	joiaus	pl	,	joiel																			joyau
jocāre		jocā́re				243.2, 274, 317, 321, 322	phonét.	joer		,	jouer																												jouer
jocāri		jocā́ri	lc			243.2, 274, 317, 321, 322	phonét.	joer		,	jouer																												jouer
jocu		jócu				10.2, 12, 119, 137, 150, 205, 218, 274, 330	phonét., formes en -ieu dissimilation	jeu		,	giu	Rol977	,	ju		,	gieu		,	jou																			jeu
-jolu		-jólu				216.4	phonét.	-uel		,	-eul																												-eul
°jovene	°	jóvene				68.2, 202, 216.3, 259, 259.3, 274	substitution de sonante	juevre		,	jovene		,	juenne		,	juene		,	juevne																			jeune
jovis dīe		jovis dī́e				158.6	phonét.	juesdi																															jeudi
jūdæu		jūdæu				205, 212	phonét.	juieu																												‘juif’
jūdicāre		jūdicā́re				119, 192, 224.3, 299	u probablement analogique	jugier																															juger
jūdicat		jū́dicat	3s			192, 224.3	phonét.	juge																															(il) juge
jūdicet		jū́dicet	3s subj			67.7	phonét.	juzt																															(qu’il) juge
°jūdicu	°	jū́dicu				272	phonét.	juge																															juge
jugu		júgu				219.6, 274, 322	jou obscur	jou		,	jeu																												joug
juk		juk	frk			119.2, 274	phonét.	joc																												‘perchoir’, cf. jucher
junctiōne		junctiṓne				136, 300.8	phonét.	joinsson																												‘redevance’
junctu		júnctu				256.2	phonét.	joint																															joint
juncu		júncu				274	phonét.	jonc																															jonc
jungebant		júngebant	3p imp			97.4	phonét.	joignoient																															(ils) joignaient
jungente		jungénte	part. prés.			97.4	phonét.	joignant																															joignant
jungere		júngere				134, 190, 349	phonét.	joindre																															joindre
jūnīcia		jūnī́cia				224.4	phonét.	genice																															génisse
°junior	°	júnior				251	phonét.	joindre	CSs																														gindre
jūniperu		jūníperu				224.4	phonét.	genoivre																															genièvre
jūniu		jū́niu				134, 192.2, 274, 291.5, 367, 387	phonét.	juin	CRs	,	juinz	CSs																	juin										juin
jūrāre		jūrā́re				107, 224.2, 274	analogique	jurer																															jurer
jūs		jū́s				274	phonét.	jus																															jus
jūstitia		jūstítia				183.3, 283.6	savant	justice		,	justise		,	jostise																									justice
°juvencellu	°	juvencéllu				184	phonét.	jovencel																															jouvenceau
juvene		júvene				68.2, 202, 216.3, 259, 259.3, 274	substitution de sonante	juevre		,	jovene		,	juenne		,	juene		,	juevne																			jeune
juventu		juvéntu				243	phonét.	jovent		,	jouvent																									‘jeunesse’
°kāda	°	kāda				105	phonét.	chaon																												‘lard grillé’
kāfūr		kāfūr	arab			105.2	phonét.	canfre																															camphre
kausjan		kausjan	got			286, 365	phonét.	choisir																															choisir
°kāwa	°	kāwa	frk			105, 223.4	gémination de w	choe		,	choue																									‘choucas’
kegil		kegil	frk			105.2	phonét.	quille																															quille
°kīnan	°	kīnan	frk			105	phonét.	rechignier																															rechigner
°klobo	°	klobo	frk			319.7	phonét.	glaon																												‘bûche’
°krabītja	°	krabītja	g			235.3	variation	escrevice																															écrevisse
°krawa	°	kráwa	vha			223.4	gémination de w	groe																												‘griffe’
°krawjan	°	krawjan	frk			319.7	phonét.	gravir																															gravir
°krūka	°	krūka	frk			105.5	variation	cruie		,	cruche																									‘cruche’
labra		lábra				337.3a	variation	levre		,	levere	TL5-382 : 5-7																											lèvre
lāc		lā́c	lc			174, 256, 300	phonét.	lait																															lait
lacerta		lacérta				176.2	substitution de suffixe	laisarde																															lézarde
lacertu		lacértu				176.2	substitution de suffixe	lezart																															lézard
lacrima		lácrima				174, 300, 334, 338, 346, 363, 371	phonét.	lairme		,	lerme		,	larme																									larme							lagrema	occ
lacrimāre		lacrimā́re				346	phonét.	lermer																												‘pleurer’
lacte		lácte				174, 256, 300	phonét.	lait																															lait
lactūca		lactū́ca				174, 222, 322	phonét.	laitue																															laitue
lacu		lácu				318	variation	lai																															lac
laeta		láéta				204.1	phonét.	liee																												‘joyeuse’
laetitia		laetítia				183.3, 283.6	savant, suffixe modifié	leece		,	liece		,	ledece	Alex																								liesse
laetu		láétu				213.5	ae > ɛ cas général	lie																												‘joyeux’
°lakeāre	°	lakeā́re				97.5, 207, 324.5	phonét.	lacier																															lacer
°lambruscu	°	lambrúscu				264.7	phonét.	lambrois																															lambris
lampada		lámpada		λαμπάς, -άδος		237.4	savant	lampe																															lampe
lāna		lā́na				208	phonét.	laine																															laine
lanceāre		lanceā́re				283	phonét.	lancier																															lancer
lāneu		lā́neu				287	évolution retardée (diverses raisons)	lange																												‘étoffe de laine’
°languīre	°	languī́re				97.5	phonét.	languir																															languir
lapsu		lápsu				291.4	phonét.	laps																															laps
laqueāre		laqueā́re				97.5, 207, 324.5	phonét.	lacier																															lacer
laqueus		láqueus				97.5	phonét.	laz																															lacs
larga		lárga				14, 256, 295, 302, 307, 357	phonét.	larc	masc.		large	fém.																											large
largu		lárgu				14, 256, 295, 302, 307, 357	phonét.	larc	masc.		large	fém.																											large
lāridu		lā́ridu				242	phonét.	lard																															lard
lāta		lā́ta				264.3	phonét.	lee																												‘large’
latīnu		latī́nu				320.3	savant	latin																															latin
latro		látro	nom sg			250, 344	phonét.	lere	CSs																											‘voleur, larron’			larron
latrōciniu		latrōcíniu				244, 250	phonét.	larrecin																															larcin
latus		látus				260.5	phonét.	lez																															lez
laubja		laubja	frk			286	phonét.	loge																															loge
laudāre		laudā́re				13, 247, 308, 315, 320, 333, 359, 365	phonét.	lauder		>	loer		>	louer		,	luer																						louer	‘faire l'éloge’
laudat		láúdat	3s			204, 223, 261	phonét.	loe		,	loue	[luə]																											(il) loue	‘fait l’éloge’ [lu]
laudemia		laudémia				285	phonét.	loenge																															louange
laudo		láúdo	1s			365		lo		>	lu																												(je) loue
lavāre		lavā́re				13, 35, 235, 308, 315, 319, 333	phonét.	laver																															laver
lavat		lávat	3s			223.4	phonét.	leve																															(il) lave
lavō		lávō	1s			316, 318, 330.1, 360	phonét.	lef		,	leve	[læv]																											(je) lave
Lazaru		Lázaru				175, 237, 250, 292, 303.1	phonét., apophonét.onie	lazre		,	ladre																												ladre
lectiōne		lectiṓne				284, 300.8	phonét.	leçon																															leçon
lectu		léctu				172, 179	phonét.	lit																															lit
leffur		léffur	g			342	phonét.	liefre		,	lefre																									‘lèvre’
lēge		lḗge				98, 148, 183, 350	phonét.	lei		>	loi		,	lwe																									loi
legere		légere				93, 117.6, 339, 346	phonét.	lire		,	leire	TL5‑506 : 13																											lire
legō		légō	1s			311	phonét.	li																															(je) lis
legūme		legū́me				222.5, 317, 321, 322	phonét.	leun																															légume	empr.
°legwa	°	légwa				212.2, 324, 324.1, 324.3	variation	liwe	Rol. 688	,	liue		,	live		,	lieve		,	lieuwe	,	lieue																	lieue
lēha		lēha	frk			264.3	phonét.	lehe																												‘femelle du sanglier’			laie
Lemovica		Lemóvica				271	phonét.																																Limoges
°lendite	°	léndite				258	phonét.	lente																															œuf de pou
lenticula		lentícula				182.4, 346	remplacement du suffixe -icula par -īcula ?	lentille																															lentille
lentu		léntu				180	phonét.	lent																															lent
Leodicu		Leódicu				272	phonét.																																Liège
leōne		leṓne				66.5	savant	leon	Rol 1111	,	lion	Rol 2436																											lion
leopardu		leopárdu				66.5	savant	leupart	Rol 1111	,	leopart		,	liebart																									léopard
lepore		lépore				90, 210, 250, 339.1, 340, 340.2, 340.3, 350	phonét.	lievre	entrée TL	,	levre	entrée TL																											lièvre
°leuca	°	leuca	celt			212.2, 324, 324.1, 324.3	variation	liwe	Rol. 688	,	liue		,	live		,	lieve		,	lieuwe	,	lieue																	lieue
°leuca	°	leuca	celt			292.4	phonét.	banlieue																															banlieue
°leuga	°	leuga				212.2, 324, 324.1, 324.3	variation	liwe	Rol. 688	,	liue		,	live		,	lieve		,	lieuwe	,	lieue																	lieue
levāre		levā́re				12, 319	phonét.	lever																															lever
°lēviāriu	°	lēviā́riu				182	phonét.	leger																															léger
levisticu		levísticu				272	phonét.	luvesche																															livèche
°leviu	°	léviu				50, 170, 177, 285, 298	phonét.	liege		,	lege																												liège
līberāre		līberā́re				64, 224.2	analogique	livrer																															livrer
līberātiōne		līberātiṓne				174.1	forme en oi analogiques	livroison		,	livraison																												livraison
lībertāte		lībertā́te				182	phonét.	liberte																															liberté
lībra		lī́bra				221	phonét.	livre																															livre	(poids)
licere		lícere				117.5	phonét.	leir																												‘être permis’
°licere	°	lícere				112	phonét.	leire																												‘être permis’
licēre		licḗre				96, 117.5	phonét.	leisir																												‘être permis’
ligāre		ligā́re				323	phonét.	leiier																															lier
ligātiōne		ligātiṓne				174.1	forme en oi analogiques	lioison																															liaison
Ligere		Lígere				53, 117.5, 117.6, 139	phonét.	Loire																															Loire
līma		lī́ma				221	phonét.	lime																															lime
līmāre		līmā́re				224.2	analogique	limer																															limer
līneola		līnéola				216.4	phonét.	lignuel		,	ligneul																												ligneul
līneu		lī́neu				287	évolution retardée (diverses raisons)	linge																															linge
Lingones		Língones				250.1, 349	substitution de sonante	Langres																															Langres
Lingonicum		Lingónicum				272.6	phonét.	Langoine																															Langoine
lingua		língua				264, 354		langue		,	lengue																												langue
°linguaticu	°	linguáticu				97.5	phonét.	langage																															langage
lingwa		língwa				264, 354		langue		,	lengue																												langue
°lintjolu	°	lintjólu				216.4	phonét.	linsuel		,	linceul																												linceul
līnu		lī́nu				221	phonét.	lin																															lin
locāre		locā́re				243.2, 351.1	phonét.	loer		,	louer																												louer	‘mettre en location’
locu		lócu				218	phonét., formes en -ieu dissimilation	lou		,	lu		,	leu		,	lieu		,	liu																			lieu
°Londinu	°	Lóndinu				250.1, 371	substitution de sonante	Londres																															Londres
longe		lónge				97.4, 134, 331	phonét.	loing		,	loin																												loin
°longitānu	°	longitā́nu				97.4, 113.1, 136, 190, 281	phonét.	lointain																															lointain
longu		lóngu				97.4, 256, 264.4	phonét.	lonc																															long
Lothariu		Lotháriu				320.2	phonét.	Ludher	Serm
°loþr	°	loþr	frk			344.4	variation	loire		,	luerre		,	loirre		,	leurre																						leurre
°lubricāre	°	lubricā́re				337.3b	variation	lovregier		,	lovergier																									‘rendre glissant’
°lūcere	°	lū́cere				112, 117.5	phonét.	luire																															luire
lūcēre		lūcḗre				117.5	phonét.	luisir																															luire
lūcet		lū́cet	3s			192	phonét.	luist																															(il) luit
°lūcōre	°	lūcṓre				322	phonét.	luor																															lueur
lūcta		lū́cta				300	phonét.	luite																															lutte
lūdicra		lū́dicra				335.2
°lumbeu	°	lúmbeu				285	phonét.	longe																															longe	(viande)
°lūminiōne	°	lūminiṓne				182.2, 260.3	variation	lumeignon		,	lumignon																												lumignon
lūna		lū́na				10, 13, 37.1, 61, 72, 222, 290, 309, 325, 388	phonét.	lune																					lune		,	leune							lune
lūnæ dīe		lūnæ dī́e	lc			158.6, 192.1	phonét.	lunsdi		>	lundi																												lundi
°lūnis dīe	°	lūnis dī́e				158.6, 192.1	phonét.	lunsdi		>	lundi																												lundi
lupa		lúpa				219.2	phonét.	love		,	louve																												louve
Lupara		Lúpara				219.2	phonét.	Louvre																															Louvre
lupu		lúpu				219.2, 318	lou, lu, loup dialectaux ou analogiques ?	leu		,	lou		,	lu																									loup		,	leu	cf. à la queue leu leu
lurida		lúrida				270	phonét.	lorde																															lourde
luridu		lúridu				256, 363	phonét.	lort		,	lourt		,	lord		,	lourd																						lourd
°lurniu	°	lúrniu				259	phonét.	lorgne																												‘qui louche’
luscu		lúscu				264.7	phonét.	lois																												‘loucher (regard)’
lutra		lútra				344.4	variation	leure		,	leurre																												loutre
mācerāre		mācerā́re				112, 334	phonét.	mairier																												‘pétrir’
macru		mácru				174.3, 179.3, 346.2	megre, maigre savants	maire		,	megre		,	maigre																									maigre
macula		mácula				94, 96, 131, 149, 173, 295, 300, 336, 338, 346	phonét.	maille																															maille
mæsta		mæsta				176	phonét.	mest		,	-e																									‘triste’
mæstu		mæstu				176	phonét.	mest		,	-e																									‘triste’
magan		magan	got, vha			105.2, 174, 271	phonét.	esmaier		,	esmaiier																									‘inquiéter, troubler’
Magdalēna		Magdalḗna				300	phonét.	Maudeleine																															Madelaine
magis		mágis				117.6, 401	phonét.	mais																															mais
magistru		magístru				98, 148.3, 272.3	phonét.	maistre																															maître
māior		mā́ior	nom sg			119, 251.2, 281.1, 329	phonét.	maire	CS																														maire							maig	cat, < māiu
°majju	°	májju				255	phonét.	mai																															mai
mājor		mā́jor				119, 251.2, 281.1, 329	phonét.	maire	CS																														maire							maig	cat, < māiu
°makjo	°	makjo	frk			286	phonét.	maçon																															maçon
°makjōne	°	makjṓne				286	phonét.	maçon																															maçon
Malbodiu		Malbódiu				287	évolution retardée (diverses raisons)																																Maubeuge
māle		mā́le				206.4	variation	mel		,	mal																												mal
male-astrūcu		male-astrū́cu				175	phonét.	malastru																															malotru
maledīcere		maledī́cere				268.1, 270, 270.5	syncope retardée	maleir		,	maudire																												maudire
maledictiōne		maledictiṓne				300.8	phonét., variation	maudiçon																															malédiction
°malefātu	°	malefā́tu				267, 269, 269.2	phonét.	maufé																												‘diable’
°malefātūtu	°	malefātū́tu				158.1	phonét.	malfeu																												‘misérable’
maleficiu		malefíciu				319.2	demi-savant	maleviz																												‘malice’
malehabitu		malehábitu				51, 266, 259, 270	phonét.	malade																															malade
male-habitu		male-hábitu				51, 266, 259, 270	phonét.	malade																															malade
male-sapidu		male-sápidu				298	phonét.	mausade																															maussade
malgrātu		malgrā́tu				349	phonét.	maugré																												‘chagrin’
°malha	°	malha	g			345.5	phonét.	male																															malle
malifatiu		malifátiu				267, 269, 269.2, 319.2	retard syncope	mauvais																															mauvais
malva		málva				289	phonét.	mauve																															mauve
mandāre		mandā́re				97.4	phonét.	mander																															mander
mandūcāre		mandūcā́re				244, 271.3, 271.4, 385	phonét.	mangier																					mangier										manger
manēre		manḗre				235	phonét.	maneir		,	manoir																									‘demeurer’ (cf. manoir)
manica		mánica				175, 295, 301, 307	phonét.	manche																															(la) manche
°maniclu	°	maníclu				345.3	incertain																						manoil							‘anse, poignée’
manicu		mánicu				272	phonét.	mange																															(le) manche
maniplum		maníplum				369																																	poignée
manipulu		manípulu				345.3	incertain																						manoil							‘anse, poignée’
manipulum		manípulum				369																																	poignée
mansiōne		mansiṓne				284, 371	phonét.	maison		,	maisun																												maison
°mānsuētīnu	°	mānsuētī́nu				175, 289.1, 289.3	phonét.	mastin																															mâtin
mansūra		mansū́ra				235	phonét.	masure																															masure
mantellu		mantéllu				175	phonét.	mantel																															manteau
manu		mánu				208, 367, 373	phonét.	main		,	mainz	pl	,	mains	pl																								main
°marcāre	°	marcā́re	g			207	phonét.	marchier																															marcher
mare		máre				206, 242, 254	phonét.	mer																															mer
margarīta		margarī́ta				64.1, 236	phonét.	margerie																															marguerite
margila		márgila				113, 113.1, 114, 349	phonét.	marle																															marne
margine		márgine				371		margene		>	marge																												marge
°mariscu	°	maríscu				264.7, 350.3	phonét.	mareis		>	marois																		marais										marais
marisk		marisk	frk			264.7, 350.3	phonét.	mareis		>	marois																		marais										marais
marītu		marī́tu				221, 235	phonét.	mari																															mari
mark-		mark-	g			105, 214, 214.1	phonét.	marchis																															marquis
°markēnse	°	markḗnse				105, 214, 214.1	phonét.	marchis																															marquis
marmor		mármor	neutre			251, 292.10	phonét.	marbre																															marbre
°marr- + -ella	°	marr- + -élla				235.3	variation	merele																												‘jeton’
martis dīe		martis dī́e				158.6	phonét.	marsdi																															mardi
martiu		mártiu				256, 258.1	phonét.	marz																															mars
martyre		mártyre				371		martre		,	martir																												martyr
mascel		máscel				259.7, 292, 303, 303.2, 303.3, 349	phonét.	mascle		,	masle		=	madle	anglo-norm	=	marle	pic																			male	angl	mâle
masculu		másculu				259.7, 292, 303, 303.2, 303.3, 349	phonét.	mascle		,	masle		=	madle	anglo-norm	=	marle	pic																			male	angl	mâle
maser		maser	frk			292.9, 303	phonét.	masdre																															madre
masticāre		masticā́re				271	phonét.	maschier																															mâcher
materiame		materíame				284	phonét.	mairien																															merrain
materiāmen		materiā́men				158.2	chute précoce de l’atone prétonique	mairrien																												‘bois de construction’
°materiāmentu	°	materiāméntu				158.2	chute précoce de l’atone prétonique	merrement																												‘bois de construction’
mātre		mā́tre				12, 206, 290, 296.4, 344, 344.1	phonét.	medre	Alex	>	mere	Alex	,	merre																									mère
mātrīculāriu		mātrīculā́riu				250	phonét.	marreglier																															marguillier
matrīna		matrī́na				344	phonét.	marraine																															marraine
°mattea	°	máttea				139	phonét.	mace																															masse
°matteūca	°	matteū́ca				23, 140, 284, 300.8	phonét.	maçue																															massue
Matthæu		Matthæu				212	phonét.	Matieu																															Matthieu
mātūru		mātū́ru				222, 226, 232, 240, 320, 384.iii	phonét.	meur																					meur										mûr
maximu		máximu				29, 30, 67	phonét.	maisme																												‘en particulier’
medianu		medíanu				137, 281	phonét.	moiien																															moyen
°medicāre	°	medicā́re				299	phonét.	megier																												‘donner soin’
medicīna		medicī́na				273, 299	phonét.	mecine																												‘médecine’
medicu		médicu				210.1, 272, 288	emprunt au latin	midie		,	mie		,	mirie		,	mire		,	miege																‘médecin’
medietāte		medietā́te				206.7	phonét.	meitie		,	moitie																												moitié
mediu		médiu				179	phonét.	mi																															mi
°meisinga	°	meisínga	g			184	phonét.	mesenge																															mésange
mel		mél				13, 35, 90, 210, 307, 310, 310.1, 329, 350	phonét.	miel		,	mel																												miel
Meldis		Méldis				181	variation																																Meaux
melior		mélior				178, 251, 329, 329.2	phonét.	mieldre	CSs	,	mieudre		,	meldre		,	meudre	TL5-1342 : 51																		‘meilleur’
meliōre		meliṓre				182.2, 283	variation	meillor		,	millor																												meilleur
melius		mélius				165.3, 171, 178, 181.4	variation	mieuz		,	mieus		,	melz	Eul 16	,	mielz		,	mieux																			mieux
°mem	°	mem	atone (clitique)			328.3	phonét.	mon	atone																														mon
°mem	°	mém	tonique			310, 328.3	phonét.	mien	tonique																														mien
memoria		memória				288.1	emprunt au latin	mémoire																													memory	angl	mémoire
°mendicitāte	°	mendicitā́te				112	phonét.	mendistié																															mendicité
menera		menera	3s fut			260.1, 292.6	phonét.	menera		>	menra																												mènera
mense		ménse				166.1, 350	phonét.	mois		>	mwe																												mois
mensūra		mensū́ra				222.4	phonét.	mesure																															mesure
°mentiōnia	°	mentiṓnia				271.5, 287, 287.1	évolution retardée (diverses raisons) donc mençonge savant, l'étymon °mentiōnica est à écarter	mençonge		,	mençogne																												mensonge
°mentiōnica	°	mentiṓnica				271.5, 287, 287.1	évolution retardée (diverses raisons) donc mençonge savant, l'étymon °mentiōnica est à écarter	mençonge		,	mençogne																												mensonge
mentōne		mentṓne				220.1	phonét.	menton																															menton
mercātu		mercā́tu				182.5, 241.1	variation	marchie																															marché
mercēde		mercḗde				33, 59, 95, 97, 97.1, 99, 100, 139, 142, 214	phonét.	merci		=	merchi	pic																											merci
mercurii dīe		mercurii dī́e	lc			158.6, 349	phonét.	mercresdi		>	mercredi																												mercredi
°mercuris dīe	°	mercuris dī́e				158.6, 349	phonét.	mercresdi		>	mercredi																												mercredi
merda		mérda				176	phonét.	merde																															merde
°merebilia	°	merebília				236.2, 371	influence de l’initiale sur la prétonique	merveille		,	merveillus	Rol																											merveille
merula		mérula	lc			176, 244, 259.5, 292	phonét.	merle																															merle
merulu		mérulu				176, 244, 259.5, 292	phonét.	merle																															merle
°mescadante	°	mescadánte				261, 384.iii	phonét.	mescheant																					mescheant										méchant
mēse		mḗse				166.1, 350	phonét.	mois		>	mwe																												mois
mespilu		méspilu				348	phonét.	mesple																															nèfle
messiōne		messiṓne				140, 284	phonét.	moisson																															moisson
metallu		metállu				320.3	savant	metal																															métal
°metipsimu	°	metípsimu				182.8	phonét.	meesme																															même
meum		méum				328.3	phonét.	mon	atone																														mon
meum		méum				310, 328.3	phonét.	mien	tonique																														mien
°mīliu	°	mī́liu				182.3, 191.2	suffixe -iliu > °-īliu	mil																															mil
minima		mínima				68.3, 291.3	merme substitution de sonante	merme		,	mame																									‘petit (doigt)’
minimu		mínimu				68.3, 291.3	merme substitution de sonante	merme		,	mame																									‘petit (doigt)’
°ministerāle	°	ministerā́le				158.3	chute de i / yod	menestrel																															ménestrel
°ministerāle	°	ministerā́le				158.3	chute de i / yod	menestrier	chgt. suffixe																														ménétrier
ministeriāle		ministeriā́le				158.3	chute de i / yod	menestrel																															ménestrel
ministeriāle		ministeriā́le				158.3	chute de i / yod	menestrier	chgt. suffixe																														ménétrier
Ministeriu		Ministériu				158.4	phonét.	menestier	Eul 10																											‘office, service’
minor		mínor				215.1, 251	moindre non phonétique	meindre		,	moindre	CSs	,	mendre	CSs																								moindre
minus		mínus				215.1, 329, 401	moins non phonétique	meins		,	moins																												moins
°minūtiāre	°	minūtiā́re				270.4, 284	phonét.	mincier																												‘couper en menus morceaux’			(é)mincer
minūtu		minū́tu				241	phonét.	menu	adj.																														menu	adj.
mīrābilia		mīrābília				236.2, 371	influence de l’initiale sur la prétonique	merveille		,	merveillus	Rol																											merveille
mīrāre		mīrā́re				224.2	analogique	mirer																															mirer
mīrāri		mīrā́ri	lc			224.2	analogique	mirer																															mirer
°mīrātōriu	°	mīrātṓriu				261	phonét.	mireoir																															miroir
misculāre		misculā́re				292, 303.2, 303.3, 349	phonét.	mescler		,	mesler		=	medler	anglo-norm																								mêler
mīserunt		mī́serunt	3p pf			117.4	phonét.	misdrent																															(ils) mirent
°misteriu	°	mistériu		μυστήριον		158.4, 179.1	adaptation de gr η	mestier																															métier
°mistiliu	°	mistíliu				182.3, 191.2	phonét.	mesteil																															méteil
mitto		mítto	1s			244	phonét.	met																															(je) mets
mōbile		mṓbile				216, 216.3, 341, 341.2, 371	phonét.	mueble		,	moble		,	mobile																						‘mobile, mouvant, qui peut changer de place’			meuble
modiolu		modíolu				122, 148, 216.4, 276, 280, 281, 281.2, 299	moieus, moyeu formes avec -s	moiuel		,	moieul		,	moieus		,	moel																						moyeu
modiu		módiu				186, 281	phonét.	muid		,	mui		,	moi																									muid
modu		módu				311	phonét.	mœt																												‘mode’
modulu		módulu				255.1, 299, 334, 345	phonét.	molle																															(le) moule
mola		móla				216	phonét.	muele																															meule
molere		mólere				12, 165, 185, 250, 292, 359	phonét.	moldre		>	moudre																												moudre
moletrīna		moletrī́na				335.1a
molinariu		molináriu				291	phonét.	mounier																															meunier
°molliāre	°	molliā́re				283	phonét.	moillier																															mouiller
monachu		mónachu				272.6	phonét.	monie		>	moine																												moine
°monasteriu	°	monastériu		μοναστήριον		179.1	adaptation de gr η	mostier		,	moustier																												moutier
monastēriu		monastḗriu		μοναστήριον		179.1	adaptation de gr η	mostier		,	moustier																												moutier
°montānea	°	montā́nea				129.1, 130, 130.1, 134, 283	phonét.	montagne																															montagne
montes		móntes	2s			67	phonét.	monz																															(tu) montes
mori		móri	lc			243	phonét.	morir		,	mourir																												mourir
°morīrat	°	morīrát	3s fut			292	phonét.	morra																															(il) mourra
°morīre	°	morī́re				243	phonét.	morir		,	mourir																												mourir
morte		mórte				185, 256	phonét.	mort																															mort
mortua		mórtua				289.7	phonét.	morte																															morte
movēre		movḗre				213.4, 243	phonét.	moveir		,	movoir		,	mouvoir																									mouvoir
muccidu		múccidu				29.1	phonét.	moiste																															moite
mūcēre		mūcḗre				97.1	phonét.	muisir		=	muisir	pic																											moisir
mūgīre		mūgī́re				98	phonét.	muir																															mugir
mūla		mū́la				222	phonét.	mule																															mule
muliere		mulíere				66.2, 86.2d, 87, 369	phonét.	moillier																												‘épouse’
mundu		múndu				190, 256, 301.1	phonét.	munt		,	mont																												monde	variétés méridionales [mɔndə]
mūnīre		mūnī́re				221.3	phonét.	munir																															munir
mūru		mū́ru				222, 244	phonét.	mur																															mur
musca		músca				140	phonét.	mosche																															mouche
musciōne		musciṓne				140, 283	phonét.	moisson																												‘moineau’
musculu		músculu				259.7, 292, 349	phonét.	mouscle		,	mosle																												moule
mūsculu		mū́sculu				259.7, 349	phonét.	muscle																															muscle
mystēriu		mystḗriu	lc	μυστήριον		158.4, 179.1	adaptation de gr η	mestier																															métier
naht		naht	vha			12, 165, 172, 186, 264.3, 290, 300, 300.7, 323.2, 356, 374	phonét.	nuit	sg	,	noit	sg	,	nuiz	pl																						Nacht	nha [naχt]	nuit							nht	mozarabe
Namnetes		Námnetes				258	phonét.	Nantes																															Nantes
napu		nápu				318	variation	nef																												‘navet’
°nāscere	°	nā́scere				112, 116.2, 116.3, 137, 140, 349	phonét.	naistre																															naître
nāsu		nā́su				254, 331	phonét.	nez		,	nes																												nez
nata		náta				261	phonét.	nee	[neə]																														née	[ne]
Nātāle		Nātā́le				235.5	obscur	noel																															Noël
nātīvu		nātī́vu				221.4, 235.4, 320	phonét.	naif																															naïf
nātūra		nātū́ra				320.3	savant	nature																															nature
°nauda	°	náúda				223	phonét.	noe		,	noue																												noue
nausea		náúsea				165, 172, 193	phonét.	noise																															noise
nāve		nā́ve				356, 374		nef	sg	,	nes	pl																											nef
navicella		navicélla				273	phonét.	nacele																															nacelle
nāvigāre		nāvigā́re				14, 93.1, 165.2, 207, 267, 271, 295, 298, 298.3, 306	phonét.	nagier																															nager
nebula		nébula				343	phonét.	nieule		,	neule		,	nieble																						‘nuage’
necāre		necā́re				13, 148, 148.1, 183.1, 315, 321, 323	phonét.	neiier		,	neier		>	noiier		,	noier		,	nier																			noyer
negat		négat	3s			183.1	phonét.	nie																															(il) nie
negō		négō	1s			311, 318.2	phonét.	ni		,	noi																												(je) nie
Nemausu		Némausu	celt			246.4	phonét.	Nemse	a occ	=	Nismes																												Nîmes							Nemse	a occ
nepos		népos				178.2	phonét.	niez	CSs	,	nies	CSs																								‘neveu’
nepōte		nepṓte				219, 254, 311, 317, 319, 319.9	variation	nevud		,	nevo		,	neveu																									neveu
neptia		néptia				177, 178.2, 284	phonét.	niece		,	nece																												nièce
nervu		nérvu				256, 289.6	phonét.	nerf																															nerf
nescia		néscia				179	phonét.	nice																												‘sot, niais’
nesciu		nésciu				179	phonét.	nice																												‘sot, niais’
°nīdicāre	°	nīdicā́re				271	phonét.	nichier		,	nigier																												nicher
nigella		nigélla				97, 98, 105.4, 148, 148.1	phonét., nigelle emprunt	noiele		,	neele		,	nigelle	emprunt																								nielle
nigru		nígru				14, 295, 295.2, 300, 300.6, 334, 336, 339, 346, 346.1	phonét.	neir		>	noir																												noir
nihil		níhil				329	phonét.	nehel																												‘rien’
nive		níve				311	phonét.	neif		,	noi																									‘neige’
°nivicāre	°	nivicā́re				271	phonét.	negier																															neiger
°nocere	°	nócere				112, 117.5	phonét.	nuire		,	noire																												nuire
nocēre		nocḗre				117.5, 189.2	nuisir analogique, nuire < °nocere ou analogique	noisir		,	nuisir																												nuire
noces		nóces	2s			189.2	phonét.	nuis																															(tu) nuis
nocet		nócet	3s			186, 189.2	phonét.	nuit																															(il) nuit
nocte		nócte				12, 165, 172, 186, 264.3, 290, 300, 300.7, 323.2, 356, 374	phonét.	nuit	sg	,	noit	sg	,	nuiz	pl																						Nacht	nha [naχt]	nuit							nht	mozarabe
nōdāre		nōdā́re				243.2	phonét.	noer		,	nouer																												nouer
nōdat		nṓdat	3s			204.1	noue analogique	neue																															(il) noue
°nōdellos	°	nōdéllos	pl			181.1	variation	noel		,	noiel		,	noiaux	pl																					‘agrafe’
°nōdellu	°	nōdéllu				181.1	variation	noel		,	noiel		,	noiaux	pl																					‘agrafe’
nōdu		nṓdu				219, 308, 308.1, 311	phonét.	nout		,	noud		,	neu		,	no																						nœud
nōmen		nṓmen				220, 242, 328.2, 331	phonét.	nom		,	non																												nom
nōmināre		nōminā́re				291.3	phonét.	nomer																															nommer
non		non				328.2	phonét., variation	non		,	nen		,	ne																									non
°nonnāne	°	nonnā́ne	nonna + -āne			208.1	phonét.	nonain	CRs	,	nonnain																												nonnain
°noptia	°	nóptia				91, 170, 187.1	phonét.	nuece		,	noce																												noce
nōs		nṓs				219.3, 329, 329.1	phonét.	nous		,	nos																												nous
nostru		nóstru				140, 250, 370	phonét.	nostro	Serm	,	nostre																												notre
novellu		novéllu				317, 319	variation	novel																															nouvel
novem		nóvem				216	phonét.	nuef																															neuf	num.
Noviomagus		Noviómagus				246.5, 285.2	chute précoce de la labiale	Noyon	Oise																														Noyon	Oise
novu		nóvu				90, 93, 216, 254, 306, 311, 313.2, 318, 319.5	phonét.	nuef		,	nof																												neuf	adj.
°nūba	°	nū́ba				89, 316, 317, 319	phonét.	nue																															nue	nom	,	nuage
nucāle		nucā́le	acc sg			128, 181.1, 243.2	analogique	noel		,	nouel		,	noiel		,	noiaus	pl																					noyau
nucāles		nucā́les	acc pl			128, 181.1, 243.2	analogique	noel		,	nouel		,	noiel		,	noiaus	pl																					noyau
nuce		núce				165, 189, 365	phonét.	noix		,	noiz		,	nois																									noix
nucīcula		nucī́cula				189	phonét.	noicille		,	noisille																									‘noisette’
nūda		nū́da				261, 373	phonét.	nue	fém., [nyə]		nu	masc.	,	nuz	masc.																								nue	[ny] adj.	,	nu	[ny] adj.
nūdu		nū́du				261, 373	phonét.	nue	fém., [nyə]		nu	masc.	,	nuz	masc.																								nue	[ny] adj.	,	nu	[ny] adj.
nūgāle		nūgā́le				224.2	phonét.	noaus																												‘pis (adv.)’
nugalior		nugálior				251, 329	phonét.	noaldre	CSs																											‘pire’
°nugālior	°	nugā́lior	nom sg			165.3, 302.2	phonét.	noaudre	CSs																											‘de moindre valeur’
nūllu + °illūi		nū́llu + °illū́i				222.2	phonét.	nului																												‘nul (aucun)’
numeru		númeru				292	phonét.	nombre																															nombre
nuptias		núptias	lc acc pl			91, 170, 187.1	phonét.	nuece		,	noce																												noce
nūtrīmentu		nūtrīméntu				250	phonét.	norrement																												‘nourriture’
°nutrīre	°	nutrī́re				224.2, 243, 344	phonét.	norrir		,	nourrir																												nourrir
nūtrīre		nūtrī́re				224.2, 243, 344	phonét.	norrir		,	nourrir																												nourrir
nutritiōne		nutritiṓne				283.6	savant	norreçon																															nourrisson
o.i.		o.i.				235.3	variation	barele		,	berele																									‘jeu amoureux’
obœdīre		obœdī́re				270.5	savant	obeir																															obéir
obscūru		obscū́ru				67, 67.6, 333	phonét.	oscur																															obscur
obstāre		obstā́re				14, 67, 295, 298	phonét.	oster																															ôter
occasiōne		occasiṓne				288	emprunt au latin	ocasion																															occasion	[zj]
occāsiōne		occāsiṓne				174.1	forme en oi analogiques	ochoison		,	ochaison																									‘circonstance’
occīdere		occī́dere				344	phonét.	ocire																															occire
oclu		óclu	AppPr 111			65, 93, 117.5, 187, 244, 252.1, 335.2, 339, 341.3, 346	variation	ueil		,	uel		,	oil	entrée GDC et TL																								œil							occhio	it
octo		ócto				186	phonét.	huit		,	uit		,	oit																									huit
octōbre		octṓbre				189	phonét.	oitovre		,	oitouvre																												octobre
oculos		óculos	pl			187.3, 379	ieus dssimilation	ieus		,	uelz																		yeux										yeux
oculu		óculu				65, 93, 117.5, 187, 244, 252.1, 335.2, 339, 341.3, 346	variation	ueil		,	uel		,	oil	entrée GDC et TL																								œil							occhio	it
odōre		odṓre				219.5, 320.3	phonét., odor savant	oudeur		,	odor	savant																											odeur
officialis		officiális				288	emprunt au latin	oficial																															officiel	[sj]
officīna		officī́na				273, 273.2	variation	uissine		,	uisine																												usine
oleu		óleu				288, 379	emprunt au latin	uelie		,	oeile		,	uele															huile										huile
Olina		Ólina				68.3	substitution de sonante	Orne																															Orne
ōlla		ṓlla				296.5	phonét.	ole		,	oule		,	eule																						‘grand pot, marmite’
-ōne		-ṓne				220.1	phonét.	-on																															-on
opera		ópera				216	phonét.	uevre		,	oevre																												œuvre
orāclum		orā́clum				335.2
orāculum		orā́culum				335.2
ōrātiōne		ōrātiṓne				174.1	forme en oi analogique	oroison		,	oraison																												oraison
orbu		órbu				264.5	phonét.	orvet																															orvet
orbu		órbu				256	phonét.	orp																															orbe	adj.
Orcada		Órcada				237.4	maintien de la posttonique	Ourche																															Ourche
ōrdine		ṓrdine				68, 250.1, 298.1, 371	substitution de sonante	ordre	Rol 3639	,	ourne		,	ordene		,	orde		,	orne																			ordre
°ordne	°	órdne				68, 250.1, 298.1, 371	substitution de sonante	ordre	Rol 3639	,	ourne		,	ordene		,	orde		,	orne																			ordre
-ōre		-ṓre				219.5	phonét.	-eur																															-eur
organu		órganu		ὄργανον		68, 237.4, 371, 381	savant	orghene		,	orgene		,	orgue		,	orgre												orgue										orgue
°orgoliu	°	orgóliu				187	phonét.	orgueil		,	orgoil																												orgueil
ornāmentu		ornāméntu				232, 236	phonét.	ornement																															ornement
ōrnāre		ōrnā́re				12, 291	phonét.	orner																															orner
°orphanīnu	°	orphanī́nu				236	phonét.	orfenin																															orphelin
orphanu		órphanu		ὀρφανόϛ		237.4, 267.2, 371	perte de la dernière syllabe	orfene		>	orfe																									‘orphelin’
°ōrulāre	°	ōrulā́re				292	phonét.	orler																															ourler
osculu		ósculu				259.7, 349	phonét.	oscle																												‘douaire’
°ossifrāga	°	ossifrā́ga				67, 269, 303.3, 323, 348.3	FC emprunt au pic	osfraie		=	orfraie	pic	>																orfraie								osprey	angl	orfraie
ossu		óssu				255, 291.4	phonét.	os																															os
ostiāriu		ostiā́riu				140	phonét.	uissier																															huissier
ostrea		óstrea				140, 186, 186.3, 284	variation ui-oi	uistre		,	oistre																												huître
-ōsu		-ṓsu				219.5	phonét.	-ous		,	-eus																												-eux
otiōsu		otiṓsu				219.5	phonét.	oiseus																															oiseux
ovicula		ovícula				319, 379	variation	oeille																					ouaille										ouaille
°ovu	°	óvu				216.3	phonét.	uef																															œuf
ōvu		ṓvu				216.3	phonét.	uef																															œuf
pācāre		pācā́re				125, 148, 174, 300.7, 306, 321, 323, 323.2, 365	phonét.	paiier		,	paier																												payer
pāce		pā́ce				174, 256	phonét.	pais																															paix
pācō		pā́cō	1s			318.2	phonét.	pai																															(je) paie
pæonia		pæónia				66.5	savant	peoine		,	pioine																												pivoine
pāgānu		pāgā́nu				323, 367	phonét.	paiien		,	paiens		,	paians																									païen
°pāgēnse	°	pāgḗnse				214	phonét.	pais																															pays
pāgina		pā́gina				267.2, 371	perte de la dernière syllabe	pagene		>	page																												page
palātiu		palā́tiu				256, 284	phonét.	palais																															palais
palea		pálea				150, 277, 283	phonét.	paille																															paille
pallidu		pállidu				270, 371		palede		>	pale																												pâle
palma		pálma				291	phonét.	paume																															paume
palpebra		pálpebra				335.1a, 371		palpebre		,	palpiere	< °palpetra																											paupière
°palpetra	°	palpétra				335.1a, 371		palpebre		,	palpiere	< °palpetra																											paupière
pālus		pā́lus				184.3	pieu emprunt au picard	pel																															pieu
pampinu		pámpinu				250.1, 371	substitution de sonante	pampene		,	pampe		,	pampre																						‘pétale (ou sa représentation)’			pampre
pānāriu		pānā́riu				174.2	obscur	panier																															panier
pāne		pā́ne				208, 254	phonét.	pain																															pain
°pantasiāre	°	pantasiā́re				174.1	forme en oi analogiques	pantoisier		,	pantaisier																									‘haleter’ (cf. pantois)
pāpiliōne		pāpiliṓne				182.2, 248.2, 260.3, 361.i, 383	phonét.	paveillon		,	pavillon																		paveillon										pavillon
pār		pā́r				310, 329	phonét.	per																															(de) pair
parabola		parábola				223.1, 343	phonét.	parole																															parole
parabolāre		parabolā́re	lc			246.3, 292	phonét.	parler																															parler
°paraula	°	paráúla				223.1, 343	phonét.	parole																															parole
°paraulāre	°	paraulā́re				246.3, 292	phonét.	parler																															parler
°paraulat	°	paráúlat	3s			246.3	analogique	parole																															parle
parente		parénte				235	phonét.	parent																															parent
°parēscere	°	parḗscere				112, 140, 349	phonét.	pareistre																															paraître
°parēte	°	parḗte				87, 158.3, 276.1	chute de i / yod	paroi																															paroi
paria		pária	neut pl			49, 115.1, 116.2, 139, 146, 149, 174.2, 277, 284	phonét.	paire																															paire
pariete		paríete				87, 158.3, 276.1	chute de i / yod	paroi																															paroi
pario		pário				237
Parīsiēnse		Parīsiḗnse				214, 214.1	phonét.	Parisis																												‘frappé à Paris’
parricu		párricu				272	phonét.	parc																															parc
partīre		partī́re				221.3	phonét.	partir																															partir
partītiōne		partītiṓne				267, 270.4, 284	phonét.	parçon																												‘partage’
pāscere		pā́scere				112, 140, 349	phonét.	paistre																															paître
passiōne		passiṓne				66.5	savant	passion																															passion
passu		pássu				175, 401	phonét.	pas																															pas	nom
pasta		pásta				140, 363	phonét.	paste																															pâte
pastiōne		pastiṓne				140, 284	phonét.	paisson																															paisson
pastor		pástor				251	phonét.	pastre	CSs																														pâtre
pastu		pástu				175	phonét.	past		,	pas																												(re)pas
patella		patélla				235.4, 5	variation, poele obscur	paele		,	paielle		,	poele																									poêle	‘ustensile de cuisine’	,
patre		pátre				7, 33, 206, 242, 250, 252.1, 333, 334, 339, 344, 344.1	phonét.	pedre	Alex	>	pere	Alex																											père
paucu		páúcu				223.5, 365		pou		,	poi		,	peu																									peu
paupere		páúpere				223, 383	phonét.	povre																					pauvre										pauvre
pausāre		pausā́re				246, 246.2, 325	phonét.	poser																															poser	[o]
pavōne		pavṓne				317, 319, 220.2, 235.4	phonét.	paon																															paon	[pɑ̃]
pavōre		pavṓre				226, 240, 319	variation	paor		,	paour		,	pour	Rol	,	peor		,	peeur																			peur
pectināre		péctinā́re				131	phonét.	peignier																															peigner
pectine		péctine				178.1, 300, 381	pieigne, pigne formes probablement dialectales	peigne		,	paigne		,	pieigne		,	pigne												peigne										peigne
pectorāle		pectorā́le				206.8	substitution de suffixe : ‑ail	peitrel																															poitrail
°pectorīna	°	pectorī́na				221	phonét.	poitrine																															poitrine
pectus		péctus				179	phonét.	piz		,	pis																												pis	nom
pede		péde				126, 210, 285.1, 311, 350	phonét.	piet		,	pied		>	pie		,	pié																						pied
pedica		pédica				210.2, 271	phonét.	piege																															piège
°pedicu	°	pédicu				272	phonét.	piege																												‘de noble origine’
pēduculu		pēdúculu				84.1, 261	phonét.	peoil		,	peouil																												pou
pēior		pḗior				251.2	phonét.	pire																															pire
pēius		pḗius				179, 281.1	phonét.	pis																															pis	‘plus mauvais’						peggio	tosc
pējjus		pḗjjus				179, 281.1	phonét.	pis																															pis	‘plus mauvais’						peggio	tosc
pelle		pélle	acc sg			181, 181.2	variation	pel		,	piau		,	peaux	pl	,	piaus	pl																					peau	cf. dépiauter
pelles		pélles	acc pl			181, 181.2	variation	pel		,	piau		,	peaux	pl	,	piaus	pl																					peau	cf. dépiauter
°pelōrida	°	pelṓrida		πελωρίδα	acc.	235.2, 241.1	variation	palourde																															palourde
°pēna	°	pḗna				215, 215.1, 367	phonét.	peine																															peine
°pendicāre	°	pendicā́re				271.3	phonét.	penchier																															pencher
pēnsile		pḗnsile				259	phonét.	poisle																															poêle	pièce
pēnso		pḗnso	1s			244	phonét.	peis		,	pois																												(je) pèse
pensu		pénsu				213	phonét.	peis		,	pois																												poids
perdere		pérdere				176	phonét.	perdre																															perdre
perdo		pérdo	1s			244	phonét.	pert																															(je) perds
periclum		períclum				335.2
pērīculōsu		pērīculṓsu				219.5	phonét.	perillous		,	perilleux																												périlleux
periculum		perículum				335.2
perīre		perī́re				260.4	analogique	perir																															périr
°pernula	°	pérnula				176	phonét.	perle																															perle
persica		pérsica				271, 371	phonét.	pesche																															pêche							persegue	occ
persōna		persṓna				220	phonét.	persone																															personne
pertica		pértica				176, 242, 271, 271.3	phonét.	perche																															perche
°pertūsiāre	°	pertūsiā́re				291	phonét.	percier																															percer
pessimu		péssimu				291	phonét.	pesme																												‘très mauvais’
pessulu		péssulu				259	phonét.	pesle		,	pedle																												pêne
°pēsu	°	pḗsu				213	phonét.	peis		,	pois																												poids
petra		pétra				27, 137, 210, 344.4	phonét.	piere		,	pierre																												pierre
°petrāriu	°	petrā́riu				344	phonét.	perrier																												‘petit canon’
°petrica	°	pétrica				30.1, 67.6, 272	phonét.	pierge																												‘chemin pierreux’
°petrōne	°	petrṓne				344	phonét.	perron																															perron
°petrosīliu	°	petrosī́liu	petrosilio attesté dans Miscellanea Tironiana, 9e siècle			250, 344, 361.iii	phonét.	perresil		>	persil																												persil
°pettia	°	pettia	celt			177	phonét.	piece		,	pece																												pièce
phlegma		phlégma		φλέγμα		181.5, 291, 300	phonét., phonét.legme emprunt	fleume																												‘lymphe’			phlegme		,	flegme		,	flemme
pīca		pī́ca				148, 148.3, 323	phonét.	pie																															pie
pice		píce				183	phonét.	peiz		,	poiz																												poix
pictūra		pictū́ra				184.2	pointure dialectal	peinture		,	pointure																												peinture
pietāte		pietā́te				65.6, 148.3	phonét.	pitie																															pitié
pigmentu		pigméntu				191.1, 300	phonét.	piument		,	piment																												piment
pīgmentu		pīgméntu	REW 6488, EM			191.1, 300	phonét.	piument		,	piment																												piment
pigritia		pigrítia				183.3, 241.1, 283.6	savant, suffixe modifié	perece		,	paresse																												paresse
pilāre		pilā́re				241	phonét.	peler																															peler
pilu		pílu				213	phonét.	peil		,	poil																												poil
pingere		píngere				184, 184.2, 349	phonét.	peindre		>	poindre																												peindre
°pinniōne	°	pinniṓne				283	phonét.	pignon																															pignon
piper		píper	neutre			227, 251, 329, 329.2	phonét.	peivre		>	poivre																												poivre
°pipr	°	pípr				227, 251, 329, 329.2	phonét.	peivre		>	poivre																												poivre
pira		píra				33, 90, 213, 325, 350	phonét.	peire		>	poire		>	pwere																									poire
°pirāriu	°	pirā́riu				241	phonét.	perier																															poirier
piscīna		piscī́na				140	phonét.	peissine																															piscine
pisciōne		pisciṓne				67.7, 140, 144, 283	phonét.	poisson																															poisson
pistrīnu		pistrī́nu				182	phonét.	pestrin																															pétrin
°pistūrīre	°	pistūrī́re				244	phonét.	pestrir																															pétrir
pisu		písu				331	phonét.	pois																															pois
placeo		pláceo	1s			244, 255	phonét.	plaz																															(je) plais
°placere	°	plácere				112, 117.5	phonét.	plaire																															plaire
placēre		placḗre				97, 99, 100, 102, 104, 117.5, 138, 139, 139.3, 141, 141.1, 141.3, 149, 214	phonét.	plaisir																															plaisir
placet		plácet	3s			67.7, 112	phonét.	plaist																															(il) plaît
placitāre		placitā́re				117.8, 300	phonét.	plaidier																															plaider
placitu		plácitu				117.5, 117.8, 252.1	phonét.	plait																															plaid
°placūtu	°	placū́tu				240	phonét.	pleu																															plu
plaga		plága				148, 323, 365	phonét.	plaie																															plaie
plāna		plā́na				325	phonét.	plaine																															plaine
°planca	°	plánca				105	phonét.	planche																															planche
plangente		plangénte	part. prés.			69.3, 97.4, 131, 264.4	phonét.	plaignant																															plaignant
plangere		plángere				97.4, 103.4, 116.3, 134, 175, 335.4, 349	phonét.	plaindre																															plaindre
plantāgine		plantā́gine				117.5	phonét.	plantain																															plantain
plasma		plásma		πλάσμα		259.6	phonét.
platanu		plátanu		πλάτανοϛ		237, 259, 297, 299	phonét.	plasne		>	plane																												platane		,	cf. érable plane
°plegan	°	plegan				105	phonét.	plegier																															pleiger
plena		pléna				333, 348, 215, 334, 367, 388	phonét.	plein																					plein		,	pleine							plein
plenu		plénu				333, 348, 215, 334, 367, 388	phonét.	plein																					plein		,	pleine							plein
plicō		plícō	1s			311	phonét.	plei																															(je) ploie
°ploj.ja	°	plój.ja				123, 137, 146, 147, 148, 285.2	perte précoce de la labiale en coda	pluie																															pluie
plūma		plū́ma				222	phonét.	plume																															plume
plumbu		plúmbu				97.4, 256, 264.4	phonét.	plom		,	plon																												plomb
pluvia		plúvia				123, 137, 146, 147, 148, 285.2	perte précoce de la labiale en coda	pluie																															pluie
podagra		pódagra				85.2	non populaire	poacre																															pouacre
pollice		póllice				97.3, 112, 185, 259.4, 264.4, 273, 302, 373.1	variation	pouz		,	pols		,	polce		,	pous		,	pouce	,	polz																	pouce
polypu		pólypu				269.3	emprunt	polpe																															poulpe
pōma		pṓma				220, 325	phonét.	pome																															pomme
ponere		pónere				185, 292	phonét.	pondre																															pondre
ponte		pónte				185, 231, 256	phonét.	pont																															pont
popia		pópia				285	phonét.	poche																															poche
poplu		póplu				225.1, 341, 341.2, 335.2, 335.4	phonét.	poblo	Serm	,	pueble		,	poble																									peuple
populu		pópulu				225.1, 341, 341.2, 335.2, 335.4	phonét.	poblo	Serm	,	pueble		,	poble																									peuple
populus		pópulus				335.4
porcellu		porcéllu				73, 97, 181, 354, 359	phonét.	pourceaux	pl	,	pourciaux	pl	,	porcel		,	pourcel		,	pourceau	,	porcelet																	pourceau
porcu		pórcu				185, 313.2, 354, 356, 359, 374	phonét.	porc	sg	,	pors	pl																											porc	[pɔʁ]
porta		pórta				12, 170, 185, 232, 236, 264, 363, 383	phonét.	porte																					porte										porte
portāre		portā́re				188, 383	porter analogique	pourter																					pourter		,	porter							porter
portat		pórtat	3s			188	phonét.	porte																															(il) porte
porticu		pórticu				29.1, 67, 67.5, 258, 272, 272.1, 381	phonét.	porche																					porche										porche
porto		pórto	1s			254.2, 256.5	analogique	port																															(je) porte
°posseo	°	pósseo	1s			186	phonét.	puis																															(je) puis		,	(je) peux
postea		póstea				284, 401	phonét.	puis																															puis	adv.
posteriōne		posteriṓne				140, 158.2, 348	chute précoce de l’atone prétonique	poitron																												‘cul’			potron(-minet)
posterula		postérula				292	phonét.	posterle																															poterne
°potēre	°	potḗre				243.2, 317.3	variation	poeir		,	pooir		>	povoir																									pouvoir
pōtiōne		pōtiṓne				189, 284, 365	phonét.	poison																															poison
praeda		práéda				204.1, 213.5, 351.1	ae > e cas minoritaire	proie																															proie
praeferre		praeférre				319.3	phonét.	preferer																															préférer
praepositu		praepósitu				252.1	phonét.	prevost																															prévôt
°prātellōs	°	prātéllōs	acc pl			181.1, 235.4, 240.1	variation	prael		,	preel		,	preaus	pl	,	praiaux	pl	,	praiel																			préau
°prātellu	°	prātéllu	acc sg			181.1, 235.4, 240.1	variation	prael		,	preel		,	preaus	pl	,	praiaux	pl	,	praiel																			préau
prātulu		prā́tulu	lc			181.1, 235.4, 240.1	variation	prael		,	preel		,	preaus	pl	,	praiaux	pl	,	praiel																			préau
precāre		precā́re				206, 323	phonét.	preier	Eul 26	,	preiier																												prier
precat		précat	3s			179	phonét.	prie																															(il) prie
precet		précet	3s subj			112	phonét.	prist																															(qu'il) prie
°prēda	°	prḗda				204.1, 213.5, 351.1	ae > e cas minoritaire	proie																															proie
prehendi		prehéndi	1s pf			221.1	métaphonie (influence du i final sur la voyelle tonique)	pris																															(je) pris
premere		prémere				211.1, 250	analogique	priembre		>	preindre																												(em)preindre
°prēnsi	°	prḗnsi				221.1	métaphonie (influence du i final sur la voyelle tonique)	pris																															(je) pris
°presbitru	°	presbítru				85	phonét.	preveire	CR	>	provoire	CR																											rue des Prouvaires	Paris
presbyter		présbyter				85, 251	phonét.	prestre	CSs																														prêtre
pretiu		prétiu				179	phonét.	pris																															prix
prīmāriu		prīmā́riu				224.2, 227.1, 241	phonét.	premier																															premier
prīncipe		prī́ncipe				191, 267.2, 270.3, 356, 371	perte de la dernière syllabe	prince																													prince	angl	prince
°prīsi	°	prī́si				221.1	métaphonie (influence du i final sur la voyelle tonique)	pris																															(je) pris
prīvāre		prīvā́re				224.2	analogique	priver																															priver
pro hoc		pro hóc				310, 327, 327.1	phonét.	poruec	tonique	,	pruec	tonique	,	poro	atone																					‘à cause de cela’
proba		próba				74.2, 216	phonét.	prueve		>	preuve																												preuve
°proditia	°	prodítia				183.3, 283.6	proece savant, suffixe modifié	proeise		>	prooise		,	proece																									prouesse
°prōditia	°	prōdítia				183.3, 283.6	proece savant, suffixe modifié	proeise		>	prooise		,	proece																									prouesse
profānus		profā́nus				319.3	savant	profane																															profane
profundu		profúndu				319.3	phonét.	profont																															profond
prōmunturiu		prōmuntúriu				190	phonét.	promontoire																															promontoire
prōmūtuāri		prōmūtuāri	lc			192.1	phonét.	emprunter																															emprunter
propagine		propágine				117.6	phonét.	provain																															provin
prope		própe				311	phonét.	pruef																												‘un (chiffre)’
°propeāna	°	propeā́na				207.2, 208.1	phonét.	prochien		>	prochain		,	prochaine																									prochain		,	prochaine
°propeānu	°	propeā́nu				207.2, 208.1	phonét.	prochien		>	prochain		,	prochaine																									prochain		,	prochaine
Provincia		Província				319.5	phonét.	Proence																															Provence
proximu		próximu				67, 186.3, 291	phonét.	pruisme		,	proisme																									‘proche, prime (abord)’
prūna		prū́na				333, 334, 348	phonét.	prune																															prune
pugna		púgna				300	phonét.	poigne																															poigne
pugnu		púgnu				117.5, 291.5, 331, 356, 374	phonét.	poing	CRs, [ɲ]	,	poinz	CRp	,	poin																									poing
pūlice		pū́lice				192.3, 259.4, 273, 302, 307	phonét.	pulce		>	puce																												puce
°pullicella	°	pullicélla				273	phonét.	pucele																															pucelle
pullicēnu		pullicḗnu				214.3, 221.6	phonét.	poucin																															poussin
pullipēde		pullipḗde				68.3, 269	substitution de sonante	pourpier		,	polpier		,	porpié																									pourpier
pullitra		púllitra				85	phonét.	poutre																															poutre
pullitra		púllitra				371		poltre																												‘jeune jument’
pullitru		púllitru				85	phonét.	poutre																															poutre
pulmōne		pulmṓne				190, 220.1	phonét.	poumon																															poumon
pulsu		púlsu				291.5, 373.1	phonét.	pouz		,	poulz		,	pols		,	polz																						pouls
pulvere		púlvere				165, 289.1, 289.3, 292, 324.4, 343	phonét.	poldre		>	poudre																												poudre
pūmice		pū́mice				259	phonét.	ponce																															ponce
punctiōne		punctiṓne				136, 284, 300.8	phonét.	poinçon																															poinçon
punctu		púnctu				136, 190, 300, 367, 387	phonét.	point		,	puint																		point										point
punctūra		punctū́ra				190	phonét.	pointure																												‘piqûre’
pungere		púngere				349	phonét.	poindre																															poindre
pūrgāre		pūrgā́re				72, 105	phonét.	purgier		>	purger																												purger
pūrgat		pū́rgat	3s			192	phonét.	purge																															(il) purge
pūtēre		pūtḗre	lc			224.2	analogique, refait	puir																															puer
puteu		púteu				165, 192.4, 284	puits, puiz croisement avec frk putte ou résultat de l'action de yod	pois		,	puiz		,	puits																									puits
pūtida		pū́tida				222, 224.2	phonét.	put		,	pute																									‘sale’			pute
pūtidu		pū́tidu				222, 224.2	phonét.	put		,	pute																									‘sale’			pute
°pūtināsiu	°	pūtinā́siu				224.2	analogique	punais																												‘fétide’
°pūtīre	°	pūtī́re				224.2	analogique, refait	puir																															puer
°putritūra	°	putritū́ra				344	phonét.	porreure																												‘saumure’
°pūttāne	°	pūttā́ne	°pūtta < pūtida + -āne			208.1	phonét.	putain	CRs																														putain
putte		putte	frk			165, 192.4, 284	puits, puiz croisement avec frk putte ou résultat de l'action de yod	pois		,	puiz		,	puits																									puits
quadrāria		quadrā́ria				174.2	obscur	carriere																															carrière
quadrātu		quadrā́tu				7, 33, 97.5, 296, 344	phonét.	carre																															carré
°quadrellu	°	quadréllu				344	phonét.	carrel																															carreau
°quadrifurcu	°	quadrifúrcu				64.1, 231, 242, 250, 344	phonét.	carrefor		,	carrefour																												carrefour
quadruviu		quadrúviu				285	phonét.	carroge																												‘carrefour’
quaerere		quáérere				116.3, 221.3, 255.3, 292, 292.12	analogique ?	querre																															quérir
quāle		quā́le				206.4	variation	quel		,	qual	Pass 332																											quel
quam		quam				328.3	phonét.	que																															que
quāre		quā́re				206.4	variation	quer		,	car																												car
quaternu		quatérnu				235.4, 365	variation	quaer		,	caer		,	quaier																									cahier
°quatordece	°	quatórdece				273.3, 381	phonét.	catorze																					quatorze										quatorze
quattuor		quáttuor				251, 289.7	phonét.	catre																															quatre
quem		quem				328.3	phonét.	que																															que
querēla		querḗla				97.5, 264	phonét.	querele																															querelle
querquēdula		querquḗdula				264.2, 345	phonét.	cercele		,	cercelle																												sarcelle
quid		quid				97.5, 310, 327, 327.1	phonét.	queit	Alex 131, 444, tonique	,	quei	tonique	>	quoi	tonique	,	coi	tonique																					quoi
quid		quid				310, 327, 327.1	phonét.	quet	atone																														que
quid		quid	atone			310, 327, 327.1	phonét.	quet	atone																														que
quid		quíd	tonique			97.5, 310, 327, 327.1	phonét.	queit	Alex 131, 444, tonique	,	quei	tonique	>	quoi	tonique	,	coi	tonique																					quoi
quietāre		quietā́re				65.6	j épenthétique	quiter																															quitter
quiētu		quiḗtu				276.1	perte irrégulière et ancienne de yod (ou i)	coi																															coi
°quīndece	°	quī́ndece				273.3	phonét.	quinze																															quinze
quīnque		quī́nque				191, 264, 264.2	phonét.	cinc		,	cinq																												cinq
quirītāre		quirītā́re				241.3	perte de la voyelle initiale dès le lt	crier																															crier
quisques		quísques	quisque + s			264.7																																								quecs	prov
[truncated: 638 more rows]
[truncated: 4 more columns]

## Sheet: par forme AF
AF	AF attr.	grec	grec attr.	.	étymon 1 tonique soulignée	étymon 1 astérisque	étymon 1 tonique accent aigu	étymon 1 attr.	.	étymon 2 tonique soulignée	étymon 2 astérisque	étymon 2 tonique accent aigu	étymon 2 attr.	.	étymon 3 tonique soulignée	étymon 3 astérisque	étymon 3 tonique accent aigu	étymon 3 attr.	.	renvois	type chgt	MF 1	MF1 attr.	.	MF 2	MF2 attr.	.	MF3	Sé (AF ou MF)	germ. mod.	germ. mod. attr.	FC1	FC1 attr.	,	FC2	FC2 attr.	,	FC3	lang rom 1	lang rom 1 attr.	lang rom 2	lang rom 2 attr.	lang rom 3	lang rom 3 attr.	lang rom 4	lang rom 4 attr.
a					habet		hábet	3s	>	°at	°	át								206.4	analogique											(il) a
a					ab		áb													206.4	phonét.											à
a					apud		ápud													206.4	phonét.											à
a					ad		ad													13, 206.4, 306, 308, 308.1, 327, 354, 356	phonét.											à
aacier					°adaciāre	°	adaciā́re													173	phonét.								‘agacer’
abe					abbāte		abbā́te													206	phonét.											abbé
abregier					abbreviāre		abbreviā́re													182, 285, 350.4	phonét.											abréger
achater					°accaptāre	°	accaptā́re													173	phonét.											acheter
ache					apiu		ápiu													298, 370	phonét.											ache
ache					°hāppja	°	hāppja	frk												264, 264.3, 285, 285.3	phonét.											hache							apcha	gasc
achier					apiariu		apiáriu													285	phonét.								‘rucher’
acier					aciariu		aciáriu													100.1, 283, 350	phonét.											acier
acointe					accognitu		accógnitu													134	phonét.											accointe
acomungier	Alex 52				°accommūnicāre	°	accommūnicā́re													190.1	phonét.								‘communier’
acreistre					adcrēscere		adcrḗscere													349	phonét.											accroître
ad					ad		ad													13, 206.4, 306, 308, 308.1, 327, 354, 356	phonét.											à
adne	anglo-norm				asinu		ásinu													175, 252.1, 259, 291, 295, 303.2, 303.3, 307	phonét.											âne
adultere					adulteru		adúlteru													371												adultère
afection					affectiōne		affectiṓne													288	emprunt au latin											affection	[ksj]
affruite																				365									‘mettre en fruit, planter’
affruitier																				365									‘mettre en fruit, planter’
affrutier	GD																			365									‘mettre en fruit, planter’
aflire					afflīgere		afflī́gere													191.3	phonét.											affliger
afuble					fībula		fī́bula	lc	,	°affībulat	°	affī́bulat	3s							248.1	influence labiale											(il) affuble
afubler					°affībulāre	°	affībulā́re													248.1	analogique											affubler
agnel					agnellu		agnéllu													125, 131, 136, 149, 173, 291, 291.2, 300, 300.1	phonét.											agneau
aguille					°acūcula	°	acū́cula													192	phonét.											aiguille
ahaner					°afannāre	°	afannā́re													319.3	phonét.											ahaner
ai					habeo		hábeo	1s												285.2	chute précoce de la labiale											(j’) ai
aidier					adjūtāre		adjūtā́re													174, 350.4	phonét.											aider
aigier					aedificāre		aedificā́re													319.3	phonét.											édifier
aigle					aquila		áquila													174.3, 324.4	aigle savant											aigle
aiglent					°aquilentu	°	aquiléntu													174.3	savant											églantier	suff. -ier
aiglentier					°aquilentu	°	aquiléntu													174.3	savant											églantier	suff. -ier
aigre					ācre		ā́cre		>	°ācru	°	ā́cru								174.3, 179.3, 346.2	egre, aigre savants								‘amer’			aigre
aigue					aqua		áqua													181.3, 206.9, 289, 300, 300.7, 300.8, 324, 324.3, 324 réf. bibl.2	variation											eau	AF eve cf. évier
ail					ālium		ā́lium		>	alliu		álliu								175.4, 255, 283	phonét.											ail
aille					aquila		áquila													174.3, 324.4	aigle savant											aigle
aim	1s																			366												(j') aime
aimai					amāvi		amā́vi	1s pf												209.5	phonét.											(j’) aimai
aime					amat		ámat	3s												208	phonét.											(il) aime
aiment					amant		ámant	3p												264.4	phonét.											(ils) aiment
aimez					amāte		amā́te	2p impér.												206.1	-ez analogique											aimez
aine					anate		ánate	lc	,	anite		ánite								208.2, 237.5, 267.2	ane obscur								‘canard’			bédane	‘bec d'ane’
ainse					anxia		ánxia													136, 175, 284	phonét.								‘anxiété, inquiétude’
ainsos					anxiōsu		anxiṓsu													136, 175	phonét.											anxieux
ainsse					anxia		ánxia													136, 175, 284	phonét.								‘anxiété, inquiétude’
ainz					°antius	°	ántius													175.2	obscur								‘auparavant’
aioel					avus		ávus		>	°aviolu	°	avíolu								148, 216.4, 285, 285.2, 365	chute précoce de la labiale											aïeul
airable					acerabulu		acerábulu													112	phonét.											érable
aire					ācre		ā́cre		>	°ācru	°	ā́cru								174.3, 179.3, 346.2	egre, aigre savants								‘amer’			aigre
aire					agru		ágru													300, 346	phonét.								‘nid (d'aigle)’
aire					ārea		ā́rea													66, 121, 174.2	phonét.											aire
airre	TL 1290 : 4				hedera		hédera													335.2, 344.4, 350.1	variation	lierre										lierre							edera	it
ais					axe		áxe													256	phonét.											ais
aisne					acinu		ácinu													67, 112, 259, 291, 300	phonét.											aine
aisse					ascia		áscia													140, 283	phonét.											aissette
aissil					axīle		axī́le													191.1	phonét.								‘bout de planche mince’
-ait					-āvit		-ā́vit	3s pf												206.6	-a analogique											-a							cantó	it	cantó	esp
aitre					ātriu		ā́triu													67.6, 284	phonét.											aître
aiudha	Serm																			370												aide	nom
aiuel					avus		ávus		>	°aviolu	°	avíolu								148, 216.4, 285, 285.2, 365	chute précoce de la labiale											aïeul
aive					aqua		áqua													181.3, 206.9, 289, 300, 300.7, 300.8, 324, 324.3, 324 réf. bibl.2	variation											eau	AF eve cf. évier
aiver					adaequāre		adaequā́re													324	phonét.								‘associer’
alaitier					allactāre		allactā́re													174.1, 207	phonét.											allaiter
albe					alba		álba													14, 175, 295, 298.3, 302, 307, 333, 365	phonét.											aube
alebastre					alabastru		alabástru													260.1	phonét.											albâtre
alegier					alleviāre		alleviā́re													285	phonét.											alléger
alegre					alacre		álacre		>	alacre		alácre								179.3, 85.2	savant											allègre
alesne					°alisnō	°	alisnō	g												291	phonét.											alêne
alge					°alliam	°	álliam	1s subj												287	évolution retardée (diverses raisons)											(que j') aille
aliegre					alacre		álacre		>	°alecre	°	alécre								179.3, 85.2, 237	savant											allègre
aligre					alacre		álacre		>	°alecre	°	alécre								179.3, 85.2, 237	savant											allègre
Alise					Alesia		Alésia													179	phonét.											Alise
Allemagne					Alamannia		Alamánnia		,	Alamannica		Alamánnica								235, 236, 271.5	variation											Allemagne
almaille					animālia		animā́lia													68.3	substitution de sonante											animal
alme					anima		ánima													68.3, 291, 291.3, 371, 371.1, 388	substitution de sonante	âme										âme
almorne	pic	ἐλεημοσύνη		>	elēmosina		elēmósina		>	°almosina	°	almósina								182.5, 303.3	variation											aumône
almosne		ἐλεημοσύνη		>	elēmosina		elēmósina		>	°almosina	°	almósina								182.5, 303.3	variation											aumône
alne					alnu		álnu													175, 244, 259, 291, 370, 372.1	phonét.											aune		,	aulne
aloel	‘alouette’				alauda + -ellu		aláúda + -éllu	acc sg	,	alauda + -ellos		aláúda + -éllos	acc pl							181.1	variation											aloyau
alors	a + lors				(il)la hōra		(il)la hōra													219.4	phonét.											lors		,	alors
alose					alausa		aláúsa													223	phonét.											alose
aloyaulx	pl				alauda + -ellu		aláúda + -éllu	acc sg	,	alauda + -ellos		aláúda + -éllos	acc pl							181.1	variation											aloyau
alter					altāre		altā́re													206.8	phonét.											autel
altre					alteru		álteru													67, 227.1, 250, 334, 348, 365	phonét.											autre
alué					°alōd	°	alōd	frk												311	phonét.											alleu
aluef					°alōd	°	alōd	frk												311	phonét.											alleu
aluet					°alōd	°	alōd	frk												311	phonét.											alleu
alun					alūmen		alū́men													222.5	phonét.											alun
amant					amante		amánte													175, 235	phonét.											amant
amarte					amāritate		amāritáte													206.7	phonét., amerte dérivation AF											amertume
ambler					ambulāre		ambulā́re													334, 348	phonét.											ambler
Ambrois					Ambrosiu		Ambrósiu													284	phonét.											Ambroise
ame					anima		ánima													68.3, 291, 291.3, 371, 371.1, 388	substitution de sonante	âme										âme
ameçon					°āmiciōne	°	āmiciṓne													182.2	phonét.											hameçon
ameeur					amātōre		amātṓre													219.5	phonét.								‘amant’
amembrer					°admemorāre	°	admemorā́re													64.1, 158	phonét.								‘se souvenir’
ameor					amātōre		amātṓre													219.5	phonét.								‘amant’
amer					amāre		amā́re													10, 13, 309, 325	phonét.											aimer
amer					amāru		amā́ru													206, 206.7	phonét.											amer
amerte	amer+te				amāritate		amāritáte													206.7	phonét., amerte dérivation AF											amertume
amertume					amāritūdine		amāritū́dine													84.1	phonét.											amertume
ameur					amātōre		amātṓre													219.5	phonét.								‘amant’
amez					amātis		amā́tis	2p												291.5, 299.4	phonét.											(vous) aimez
ami					amīcu		amī́cu													221	phonét.											ami
amie					amīca		amī́ca													191, 204.1, 323, 389	phonét.	amie		,	ami							amie
amirer					admīrārī		admīrā́rī													299	phonét.											admirer
amistie					amīcitia		amīcítia	lc	>	°amīcitāte	°	amīcitā́te								112, 191, 206.7, 207	i probablement analogique											amitié
amons	1p																			366												(nous) aimons
amor					amōre		amṓre													219.5, 370, 371	dialectal											amour
amour					amōre		amṓre													219.5, 370, 371	dialectal											amour
ample					amplu		ámplu													348	phonét.											ample
amur	Rol, Serm				amōre		amṓre													219.5, 370, 371	dialectal											amour
an	CRs				annu		ánnu													291.4, 291.5, 356, 373, 374	phonét.											an
ancele					ancilla		ancílla													97, 139, 139.2	phonét.								‘servante’
ancessor	CRs				antecessōre		antecessṓre													158	phonét.											ancêtre
ancestre	CSs				antecessor		antecéssor	nom sg												251, 292, 329	phonét.											ancêtre
anche					°ankja	°	ankja	frk												286	phonét.											anche
ancor					°hinc ad hōram	°	hinc ad hṓram		,	°hinc hac hōra	°	hinc hac hōra								219.4	phonét.											ores	d’ores et déjà	,	or		,	dorénavant
ancre					ancora		áncora													67, 101, 244, 301, 334, 349	phonét.											ancre
ane					anate		ánate	lc	,	anite		ánite								208.2, 237.5, 267.2	ane obscur								‘canard’			bédane	‘bec d'ane’
ane					asinu		ásinu													175, 252.1, 259, 291, 295, 303.2, 303.3, 307	phonét.											âne
aneille					°anaticula	°	anatícula	lc	>	°anatīcula	°	anatī́cula								261	phonét.											anille
aneme					anima		ánima													68.3, 291, 291.3, 371, 371.1, 388	substitution de sonante	âme										âme
anemes	Psautier d'Oxford				anima		ánima													68.3, 291, 291.3, 371, 371.1, 388	substitution de sonante	âme										âme
ange					angelu		ángelu													267.2, 371, 371.1	savant									angel	angl	ange
angele	Psautier d'Oxford				angelu		ángelu													267.2, 371, 371.1	savant									angel	angl	ange
Angiers					Andecāvis		Andecā́vis													271.4	phonét.											Angers
angle					angulu		ángulu													349	phonét.											angle
angle					angelu		ángelu													267.2, 371, 371.1	savant									angel	angl	ange
angoisse					angustia		angústia													12, 30, 67.7, 140, 144, 149, 264, 284, 333	phonét.											angoisse
angre					angelu		ángelu													267.2, 371, 371.1	savant									angel	angl	ange
Anjou					Andecāvu		Andecā́vu													209, 271.4	phonét.											Anjou
anme					anima		ánima													68.3, 291, 291.3, 371, 371.1, 388	substitution de sonante	âme										âme
-ant					-ent		-ent	3p												242.3	analogique											-ant	[-ə(t)]
antain	CRs				°amitāne	°	amitā́ne	amita + āne												208.1	phonét.								‘tante’
ante					amita		ámita													175	phonét.											tante
antiene					antiphona		antíphona		>	°antephona	°	antéphona								244, 298, 298.1	phonét.											antienne
antienne					antiphona		antíphona		>	°antephona	°	antéphona								244, 298, 298.1	phonét.											antienne
antievre					antiphona		antíphona		>	°antephona	°	antéphona								244, 298, 298.1	phonét.											antienne
antive					antīqua		antī́qua													324	phonét.								‘ancien’
antoine					antiphona		antíphona													298.1	phonét.											antienne
anvel					annuāle		annuā́le		>	°anuāle	°	anuā́le								59, 66, 289.7	emprunt au latin								‘annuel’
anz	CRp				annu		ánnu													291.4, 291.5, 356, 373, 374	phonét.											an
aoel					avus		ávus		>	°aviolu	°	avíolu								148, 216.4, 285, 285.2, 365	chute précoce de la labiale											aïeul
aoire					°adaugere	°	adáúgere													117.6	phonét.								‘multiplier’
aoitier					adauctāre		adauctā́re													165	phonét.								‘augmenter’
aost					augustu		augústu	lc	>	°agustu	°	agústu								193.1, 235.1, 235.4, 322	dissimilation											août	[ut]
Aoste					Augusta		Augústa		>	°agusta	°	agústa								235.1	dissimilation											Aoste
aouiller					°adoculāre	°	adoculā́re													235.4	phonét.											ouiller
aoust					augustu		augústu	lc	>	°agustu	°	agústu								193.1, 235.1, 235.4, 322	dissimilation											août	[ut]
apareillier					°appariculāre	°	appariculā́re													158.1	phonét.								‘préparer’			appareiller
apereillier					°appariculāre	°	appariculā́re													158.1	phonét.								‘préparer’			appareiller
aploiier					applicāre		applicā́re													271.1	savant											appliquer
apoier					°appodiāre	°	appodiā́re													148, 189	phonét.											appuyer
apoiier					°appodiāre	°	appodiā́re													148, 189	phonét.											appuyer
aporter	StLég 200				adportāre		adportā́re													296	phonét.											apporter
apostle					apostolu		apóstolu													68, 371	savant											apôtre
apostoile					apostolicu		apostólicu													272.6	phonét.											apôtre
apostolie					apostolicu		apostólicu													272.6	phonét.											apôtre
apostre					apostolu		apóstolu													68, 371	savant											apôtre
appeler					appellāre		appellā́re													182.2	phonét.											appeler
approche					adpropiat		adprópiat	3s, attesté Vulgate (Versio Itala, 4e siècle)												170, 187.1	phonét.											(il) approche
aprentiz					°adprenditīciu	°	adprenditī́ciu													158	phonét.											apprenti
apres					adpressu		adpréssu													176	phonét.											après
apreveisier					°adprīvātiāre	°	adprīvātiā́re													174.1	croisement avec vitiāre											apprivoiser
aprevoisier					°adprīvātiāre	°	adprīvātiā́re													174.1	croisement avec vitiāre											apprivoiser
aprueche					adpropiat		adprópiat	3s, attesté Vulgate (Versio Itala, 4e siècle)												170, 187.1	phonét.											(il) approche
araim					aerāmen		aerā́men													241.1	variation											airain
araisnier					°adratiōnāre	°	adratiōnā́re													174, 174.1	phonét.											arraisonner
arbaleste					arcuballista		arcuballísta													158, 269	phonét.											arbalète
arbre					arbore		árbore													67, 173, 334, 348	phonét.											arbre
arbreisel					arboriscellu		arboriscéllu													158.5, 183	phonét.											arbrisseau
arbroisel					arboriscellu		arboriscéllu													158.5, 183	phonét.											arbrisseau
arc					arcu		árcu													256, 313.2, 381	variation	arc										arc	[k]
arche					arca		árca													105	phonét.											arche
arçon					°arciōne	°	arciṓne													29.1, 278, 283	phonét.											arçon
Ardennes					Arduenna		Arduénna													289.7	phonét.											Ardennes
ardeur					ardōre		ardṓre													12, 264, 333	phonét.											ardeur
ardi					°hardjan	°	hardjan	frk												264.3	phonét.											hardi
areine					arēna		arḗna													215	phonét.											arène
arere					arātru		arā́tru													344	phonét.											araire
argent					argentu		argéntu													16, 97, 100, 104, 107, 173, 281	phonét.											argent
Argentan					Argentomagu		Argentómagu													246.5	phonét.											Argenton		,	Argentan
Argenton					Argentomagu		Argentómagu													246.5	phonét.											Argenton		,	Argentan
argile					argilla		argílla													97	phonét.											argile
ariere					adretro		adrétro													85, 350	phonét.											arrière
armaille					animālia		animā́lia													68.3	substitution de sonante											animal
armaire					armāriu		armā́riu													215.1	armoire non phonétique											armoire
arme					anima		ánima													68.3, 291, 291.3, 371, 371.1, 388	substitution de sonante	âme										âme
arme					arma		árma													12, 291	phonét.											arme
armeure					armātūra		armātū́ra													222.4, 236, 261	phonét.											armure
armoire					armāriu		armā́riu													215.1	armoire non phonétique											armoire
armoise		ἀρτεμισία		>	artemīsia		artemī́sia	lc	>	°artemisia	°	artemísia								67, 221.5, 284	phonét.											armoise
arne	pic				asinu		ásinu													175, 252.1, 259, 291, 295, 303.2, 303.3, 307	phonét.											âne
aroi					ariete		aríete													276.1	perte irrégulière et ancienne de yod (ou i)								‘bélier’
aronde					hirundine		hirúndine	lc	>	°hirunda	°	hirúnda								241.1	variation											aronde
arrachier																				350.4												arracher
arrester					adrestāre		adrestā́re													344	phonét.											arrêter
arriere					adretro		adrétro													85, 350	phonét.											arrière
artimaire					arte‑ma(thema)tica		arte‑má(thema)tica													288	emprunt au latin								‘magie’
arveire					arbitriu		arbítriu													67.6, 139, 183, 264.5, 284, 344	phonét.								‘illusion’
arvoire					arbitriu		arbítriu													67.6, 139, 183, 264.5, 284, 344	phonét.								‘illusion’
as					habes		hábes	2s	>	°as	°	ás								206.4	analogique											(tu) as
-as					habes		hábes	fut 2s	>	°-as	°	-ás								206.5	analogique											-as
ascouter					auscultāre		auscultā́re		>	ascoltāre		ascoltā́re		,	°escultāre	°	escultā́re			190, 193.1, 235.1	dissimilation, formes en es- par substitution de préfixe											écouter
asme					asthma		ásthma													67	phonét.											asthme
asne					asinu		ásinu													175, 252.1, 259, 291, 295, 303.2, 303.3, 307	phonét.											âne
aspre					asperu		ásperu													250, 348	phonét.											âpre
assaisnier					°adsatiōnāre	°	adsatiōnā́re													174.1	phonét.											assaisonner
assez					°adsatis	°	adsatis													299	phonét.											assez
assoldre					absolvere		absólvere													292	phonét.											absoudre
assovir					°assopīre	°	assopī́re													319	variation											assouvir
astre		ὄστρακον		>	astracu		ástracu													246.5	phonét.											âtre
at					ad		ad													13, 206.4, 306, 308, 308.1, 327, 354, 356	phonét.											à
-at					habet		hábet	fut 3s	>	°-at	°	-át								206.5	analogique											-a
-at					-āvit		-ā́vit	3s pf												206.6	-a analogique											-a							cantó	it	cantó	esp
atraver					trabo		trabo	frk												319.7	phonét.								‘installer en tente’
atre		ὄστρακον		>	astracu		ástracu													246.5	phonét.											âtre
aubain					°alibānu	°	alibā́nu													267, 269	phonét.											aubain
aubastre					alabastru		alabástru													260.1	phonét.											albâtre
aube					alapa		álapa													269	phonét.											aube	roue
aube					alba		álba													14, 175, 295, 298.3, 302, 307, 333, 365	phonét.											aube
aubun					albūmen		albū́men													222.5	phonét.								‘blanc d’œuf’
audience					audientia		audiéntia													288	emprunt au latin											audience	[dj]
audir					audīre		audī́re													247, 320	phonét.											ouïr
auge					alveu		álveu													67, 278.1, 285	phonét.											auge
auge					°alliam	°	álliam	1s subj												287	évolution retardée (diverses raisons)											(que j') aille
aulx	pl				ālium		ā́lium		>	alliu		álliu								175.4, 255, 283	phonét.											ail
aune					alnu		álnu													175, 244, 259, 291, 370, 372.1	phonét.											aune		,	aulne
aura					°haberat	°	haberát	3s fut												343	phonét.											(il) aura
aurone					abrotonu		abrótonu													337.3a, 343	variation											aurone
-aut					-āvit		-ā́vit	3s pf												206.6	-a analogique											-a							cantó	it	cantó	esp
autre					alteru		álteru													67, 227.1, 250, 334, 348, 365	phonét.											autre
autrui					°alterūi	°	alterū́i	alterī datif de alter croisé avec cūī datif de quī												222.2, 234	phonét.											autrui
auve					alapa		álapa													269	phonét.											aube	roue
aux	pl				ālium		ā́lium		>	alliu		álliu								175.4, 255, 283	phonét.											ail
avar					habēre		habḗre													213.4, 235, 264.3, 350.3	phonét.											avoir
aveine					avēna		avḗna													215.1	avoine non phonétique											avoine
aveir					habēre		habḗre													213.4, 235, 264.3, 350.3	phonét.											avoir
avelaine					abellāna		abellā́na													182.2, 260.3	phonét.											aveline
avenir					advenīre		advenī́re													289, 299, 295, 306	advenir savant											advenir
averoine	TL1-681 : 45 sq., REW 39				abrotonu		abrótonu													337.3a, 343	variation											aurone
aveu					advocō		advócō	1s												322	phonét.											(j') avoue
Avignon					Aveniōne		Aveniṓne													248.2, 260.3	phonét.											Avignon
avoer					advocāre		advocā́re													299	phonét.											avouer
avogle					°aboculo	°	abóculo													346.2	savant											aveugle
avoi					abiēte		abiḗte													276.1	perte irrégulière et ancienne de yod (ou i)								‘sapin’
avoine					avēna		avḗna													215.1	avoine non phonétique											avoine
avoir					habēre		habḗre													213.4, 235, 264.3, 350.3	phonét.											avoir
avoltre					adulteru		adúlteru													371												adultère
avorter					abortāre		abortā́re													188	phonét.											avorter
avoulter					abortāre		abortā́re													188	phonét.											avorter
avoutre					adulteru		adúlteru													371												adultère
avoutrer					adulterāre		adulterā́re													190	phonét.								‘commettre un adultère’
avra					°haberat	°	haberát	3s fut												343	phonét.											(il) aura
avuec					apud hoc		apud hóc													310, 327, 380	phonét.	avec										avec
axis	Renart				axīles		axī́les	pl												191.1	essieu emprunt au picard	aisils		,	aisis							essieu
aθ					ad		ad													13, 206.4, 306, 308, 308.1, 327, 354, 356	phonét.											à
baaillier					batāculāre		batāculā́re		>	batāclāre		batāclā́re	attesté TLFi							173, 235.4	phonét.											bâiller
bacin					°baccīnu	°	baccī́nu													97, 139	phonét.											bassin
baer					°batāre	°	batā́re													128, 235.4, 240.1	beer analogique											béer		,	bayer
baie					bāca		bā́ca													148, 323, 323.3	phonét.											baie
baigner					balneāre		balneā́re													350	phonét.											baigner
baignier					balneāre		balneā́re													350	phonét.											baigner
baillarge					baleāricu		baleā́ricu													272, 272.1	phonét.								‘orage de printemps’
baillier					bajulāre		bajulā́re													119	phonét.											bailler
bain					balneum		bálneum		>	°baneu	°	báneu								134, 137, 368, 373	phonét.											bain
bainz	pl				balneum		bálneum		>	°baneu	°	báneu								134, 137, 368, 373	phonét.											bain
Baisdra	en 588				Baxera		Báxera	nom propre	>	°Bajsera	°	Bájsera								300.5	phonét.
baisier					bāsiāre		bāsiā́re													115.1, 139, 139.3, 141.2, 144.2, 149, 174, 207, 277, 284, 303, 313	phonét.											baiser	[z]
baissier					°bassiāre	°	bassiā́re													23, 115.1, 140, 144, 144.2, 207, 284, 284.5, 303	phonét.											baisser
balance					bilanx		bílanx	lc	>	°bilancia	°	biláncia								241.1	variation											balance
baler					bālāre		bālā́re													235.3	variation											bêler
baller					ballāre		ballā́re													173	phonét.											baller
balseme					balsama		bálsama													371												baume
balsemu	Roman d'Alexandre				balsama		bálsama													371												baume
banlieue					°leuca	°	leuca	celt	>	°ban-legwa	°	ban-légwa								292.4	phonét.											banlieue
barbe					barba		bárba													302, 333	phonét.											barbe
Barbe					Barbara		Bárbara													237.4	maintien de la posttonique											Barbara
barele					o.i.		o.i.													235.3	variation								‘jeu amoureux’
baron					°baro	°	baro	g	>	°barōne	°	barṓne								220.1	phonét.											baron
basilique																				372, 374												basilique
basilisque																				372, 374												basilique
bataille					battuālia		battuā́lia													67.3, 289.7	processus lt											bataille
bataison																				174.1	variation suff. -tiōne, -siōne > -aison, -oison											battaison
batesme					baptisma		baptísma													291	phonét.											baptême
batoison																				174.1	variation suff. -tiōne, -siōne > -aison, -oison											battaison
Baudas					Bagdad		Bágdad													165.2, 295, 300	phonét.											Bagdad
bayer					°batāre	°	batā́re													128, 235.4, 240.1	beer analogique											béer		,	bayer
Bazeille					basilica		basílica													271.5	variation											Bazeille
beaux	pl				bellu		béllu	acc sg	,	bellōs		béllōs	acc pl							127, 181, 307.3	variation											beau		,	bel
bec					beccu		béccu													313.2	phonét.											bec
beer					°batāre	°	batā́re													128, 235.4, 240.1	beer analogique											béer		,	bayer
beif					bibō		bíbō	1s												254, 306, 311, 375	phonét.											(je) bois
bel					bellu		béllu	acc sg	,	bellōs		béllōs	acc pl							127, 181, 307.3	variation											beau		,	bel
bele					bella		bélla													345.5	phonét.											belle
beler					bālāre		bālā́re													235.3	variation											bêler
beneir					benedīcere		benedī́cere													270.5	phonét.											bénir
beneistre					benedīcere		benedī́cere		>	°benedicere	°	benedícere								30.2, 112.2	savant								‘bénir’
benevis					beneficiu		benefíciu													319.2	demi-savant								‘bienfait’
berbis					vervēce		vervḗce	lc	>	°vervīce	°	vervī́ce		>	°berbīce	°	berbī́ce			112, 275.2, 289.5, 358	irrégulier											brebis
berbiz					vervēce		vervḗce	lc	>	°vervīce	°	vervī́ce		>	°berbīce	°	berbī́ce			112, 275.2, 289.5, 358	irrégulier											brebis
bercil					°berbēcīle	°	berbēcī́le	REW 9268												273, 273.2, 273.3	phonét.								‘bercail’, cf. Bercy
berele					o.i.		o.i.													235.3	variation								‘jeu amoureux’
Bernard					Bernhard		Bernhard	frk												264.4	phonét.											Bernard
beroete					°birota	°	biróta		>	°beroue + -ette	°	beroue + -ette								260.1	phonét.											brouette
bers					°bertiu	°	bértiu	celt ?												177	phonét.											berceau
berzil					°berbēcīle	°	berbēcī́le	REW 9268												273, 273.2, 273.3	phonét.								‘bercail’, cf. Bercy
besace					bisaccia		bisáccia													283	phonét.											besace
Besançon					Vesontiōne		Vesontiṓne													275.2	variation											Besançon
besliver					°beslīquāre	°	beslī́quā́re													324	phonét.								‘courir de biais’
beste					besta		bésta													303	phonét.									beast	angl	bête
betoine					vettonica		vettónica													272.6	phonét.								‘betonica officinalis, plante des bois’
betonie					vettonica		vettónica													272.6	phonét.								‘betonica officinalis, plante des bois’
beu					°bibūtu	°	bibū́tu	part												222.1, 248.1	phonét.											bu
bevant					bibente		bibénte	part												248.1	influence labiale ou analogique											buvant
biaus	pl				bellu		béllu	acc sg	,	bellōs		béllōs	acc pl							127, 181, 307.3	variation											beau		,	bel
biaux	pl				bellu		béllu	acc sg	,	bellōs		béllōs	acc pl							127, 181, 307.3	variation											beau		,	bel
bied					°bedu	°	bédu	celt												311	phonét.											bief
bien					bene		béne													12, 211, 264, 285.1, 379, 401	phonét.	bien										bien
biere					°bera	°	béra	g												210	phonét.											bière
biers					°bertiu	°	bértiu	celt ?												177	phonét.											berceau
bies					°bedu	°	bédu	celt												311	phonét.											bief
biez					°bedu	°	bédu	celt												311	phonét.											bief
bisse					bestia		béstia													140, 179	phonét.											bisse		,	biche
blanc																				313.1, 354, 370, 372												blanc		,	blanche
blanche																				313.1, 354, 370, 372												blanc		,	blanche
blancs	Rol																			313.1, 354, 370, 372												blanc		,	blanche
blasmer					°blastēmāre	°	blastēmā́re													67, 242, 303, 333, 334, 348	phonét.											blâmer
blastengier					°blastemiāre	°	blastemiā́re													285	phonét.								‘blâmer’
Blaye	Gironde				Blavia		Blávia													285.2	chute précoce de la labiale											Blaye	Gironde
ble					°blād	°	blād	frk												206	phonét.											blé
blecier					°blettjan	°	blettjan	frk	>	°blettiāre	°	blettiā́re								119.2, 284	phonét.											blesser
blet					°blād	°	blād	frk												206	phonét.											blé
blo					blao		blao	g	>	blāvu		blā́vu								209.4	bleu obscur											bleu
blois					blaesu		bláésu													213.5	ae > e cas minoritaire								‘bègue’
blou					blao		blao	g	>	blāvu		blā́vu								209.4	bleu obscur											bleu
boc					°bucco	°	bucco	celt												105.3	phonét.											bouc
boche					bucca		búcca													188	phonét.											bouche
bochet	dér., ‘boucher’				°bucco	°	bucco	celt												105.3	phonét.											bouc
bochier	dér., ‘petit bouc’				°bucco	°	bucco	celt												105.3	phonét.											bouc
boe					°bawa	°	bawa	celt												223.4	gémination de w											boue
boel					botellu		botéllu	acc sg	,	botellōs		botéllōs	acc pl							181.1, 243.2	variation											boyau
boiel					botellu		botéllu	acc sg	,	botellōs		botéllōs	acc pl							181.1, 243.2	variation											boyau
boif					bibō		bíbō	1s												254, 306, 311, 375	phonét.											(je) bois
bois					°bosk-	°	bosk-	g	>	°boscu	°	bóscu								264.7	phonét.											bois
boisse					bostia		bóstia	celt												284	phonét.											boisseau
boivre					bibere		bíbere													334, 339, 340, 350	phonét.											boire
bole					bulla		búlla													296.5	phonét.											boule
bon					bonu		bónu		,	bona		bóna								217, 301.1, 367, 368	phonét., analogique	bon		,	bun		,	bonne				bon	méridional [bɔŋ]	,	bonne
Boniface					Bonifatiu		Bonifátiu													283.6	savant											Boniface
bonne					bonu		bónu		,	bona		bóna								217, 301.1, 367, 368	phonét., analogique	bon		,	bun		,	bonne				bon	méridional [bɔŋ]	,	bonne
bonte					bonitāte		bonitā́te													206.7	phonét.											bonté
boquet					°bucco	°	bucco	celt												105.3	phonét.											bouc
bordon					burdōne		burdṓne													73, 188	phonét.											bourdon
borgne					°borniu	°	bórniu													283, 381	phonét.	borgne										borgne
borjon					burriōne		burriṓne													139, 150, 278.2, 284, 284.5	phonét.											bourgeon
borne	pic				°bodina	°	bódina	celt												299, 303.3, 381	emprunt au pic	borne										borne
bosne					°bodina	°	bódina	celt												299, 303.3, 381	emprunt au pic	borne										borne
bouche					bucca		búcca													188	phonét.											bouche
boucle					buccula		búccula													349	phonét.											boucle
boue					°bawa	°	bawa	celt												223.4	gémination de w											boue
bouffle					bubalu		búbalu													342.1	réaction contre vl											buffle
bougre					bulgaru		búlgaru													334, 349	phonét.											bougre
bouiaus	pl				botellu		botéllu	acc sg	,	botellōs		botéllōs	acc pl							181.1, 243.2	variation											boyau
bourdon					burdōne		burdṓne													73, 188	phonét.											bourdon
bourgeois					burgēnse		burgḗnse													214.1	substitution de suffixe											bourgeois
bovier					bovāriu		bovā́riu													319	variation											bouvier
boyaux	pl				botellu		botéllu	acc sg	,	botellōs		botéllōs	acc pl							181.1, 243.2	variation											boyau
bracier					braciāre		braciā́re													283	phonét.											brasser
brai					°bragu	°	brágu	celt												318.2	phonét.								‘boue, fange’
bras					brachiu		bráchiu													283, 333, 334, 348	phonét.											bras
brau					°bragu	°	brágu	celt												318.2	phonét.								‘boue, fange’
braz					brachiu		bráchiu													283, 333, 334, 348	phonét.											bras
brebis					vervēce		vervḗce	lc	>	°vervīce	°	vervī́ce		>	°berbīce	°	berbī́ce			112, 275.2, 289.5, 358	irrégulier											brebis
breche					°breka	°	breka	frk												105, 105.5, 296.3	phonét.											brèche
bref					brevi		brévi													350	phonét.											bref
Briare	Loiret				Brivoduru		Brivóduru													344.4	variation											Briare	Loiret	,	Briarres	Essonne
Briarres	Essonne				Brivoduru		Brivóduru													344.4	variation											Briare	Loiret	,	Briarres	Essonne
brief					brevi		brévi													350	phonét.											bref
broeillier					°brodiculāre	°	brodiculā́re													243.2	variation											brouiller
broigne					°brunnja	°	brunnja	frk												283	phonét.											besogne
broiier					°brekan	°	brekan	frk												105.2	phonét.											broyer
broil	entrée TL				brogilos		brogilos	celt	>	brogilu		brógilu								187, 334, 346	variation											breuil
brooillier					°brodiculāre	°	brodiculā́re													243.2	variation											brouiller
brouete					°birota	°	biróta		>	°beroue + -ette	°	beroue + -ette								260.1	phonét.											brouette
brudler	anglo-norm				°brustulāre	°	brustulā́re													303.2	phonét.											brûler
brueil	entrée TL				brogilos		brogilos	celt	>	brogilu		brógilu								187, 334, 346	variation											breuil
bruil	entrée TL				brogilos		brogilos	celt	>	brogilu		brógilu								187, 334, 346	variation											breuil
brun					°brūnu	°	brū́nu	g												222	phonét.											brun		,	brune
bu					°bibūtu	°	bibū́tu	part												222.1, 248.1	phonét.											bu
bucler					bucculāre		bucculā́re													206.8	substitution de suffixe : ‑ier											bouclier
buef					bove		bóve													13, 35, 216, 308, 365	phonét.											bœuf
bueille					botulu		bótulu		>	°bocla	°	bócla								345	phonét.								‘entrailles’
buen					bonu		bónu		,	bona		bóna								217, 301.1, 367, 368	phonét., analogique	bon		,	bun		,	bonne				bon	méridional [bɔŋ]	,	bonne
buene					bonu		bónu		,	bona		bóna								217, 301.1, 367, 368	phonét., analogique	bon		,	bun		,	bonne				bon	méridional [bɔŋ]	,	bonne
buer					°būkōn	°	būkōn	frk	>	°būcāre	°	būcā́re								322.4	phonét.											cf. buée
bufle					bubalu		búbalu													342.1	réaction contre vl											buffle
bugle	plante				būgula		bū́gula													346.2	savant											bugle	plante
buille					botulu		bótulu		>	°bocla	°	bócla								345	phonét.								‘entrailles’
bun					bonu		bónu		,	bona		bóna								217, 301.1, 367, 368	phonét., analogique	bon		,	bun		,	bonne				bon	méridional [bɔŋ]	,	bonne
buof					bove		bóve													13, 35, 216, 308, 365	phonét.											bœuf
buona	Eul 1				bonu		bónu		,	bona		bóna								217, 301.1, 367, 368	phonét., analogique	bon		,	bun		,	bonne				bon	méridional [bɔŋ]	,	bonne
bure					būtyru		bū́tyru													334, 363.2	phonét.											beurre
burrer					°būtyrāre	°	būtyrā́re													344	phonét.											beurrer
buvant					bibente		bibénte	part												248.1	influence labiale ou analogique											buvant
bwere					bibere		bíbere													334, 339, 340, 350	phonét.											boire
ça	atone				°ecce hāc	°	ecce hāc													327, 327.1	phonét.											çà
Caðun					Catomagu		Catómagu													217.1, 246.5, 320.2	phonét.											Caen
Caem					Catomagu		Catómagu													217.1, 246.5, 320.2	phonét.											Caen
caer					quaternu		quatérnu													235.4, 365	variation											cahier
cage					cavea		cávea													50, 105.5, 285.2, 298	jaie chute précoce de la labiale, cage emprunt au picard, normand								‘cage’			cage
çai	tonique				°ecce hāc	°	ecce hāc													327, 327.1	phonét.											çà
caillier					coāgulāre		coāgulā́re													66, 173	phonét.											cailler
calendier					calendāriu		calendā́riu													174.2	obscur											calendrier
calice					calice		cálice													371												calice
calumpnia					columna		colúmna													292.8	variation (graphique)											colonne
Cambrai	Nord				Camerācu		Camerā́cu													318.2	phonét.											Chambray	Eure	,	Cambrai	Nord
cambre	pic	καμάρα	‘voûte’	>	camera		cámera		,	camara		cámara								12.3, 59, 93, 105.1, 237, 292, 303.1	phonét.											chambre
canchon	pic				cantiōne		cantiṓne													97.1, 139, 139.2, 142, 144.1, 148.4, 284	phonét.											chanson
canfre					kāfūr		kāfūr	arab												105.2	phonét.											camphre
canter	pic				cantāre		cantā́re													12, 105.1, 264, 266	phonét.											chanter
cantique					canticu		cánticu													371												cantique
car					quāre		quā́re													206.4	variation											car
Carentan					Carentomagu		Carentómagu													246.5	phonét.											Carenton		,	Carentan
Carenton					Carentomagu		Carentómagu													246.5	phonét.											Carenton		,	Carentan
carre					quadrātu		quadrā́tu													7, 33, 97.5, 296, 344	phonét.											carré
carrefor					°quadrifurcu	°	quadrifúrcu													64.1, 231, 242, 250, 344	phonét.											carrefour
carrefour					°quadrifurcu	°	quadrifúrcu													64.1, 231, 242, 250, 344	phonét.											carrefour
carrel					°quadrellu	°	quadréllu													344	phonét.											carreau
carriere					quadrāria		quadrā́ria													174.2	obscur											carrière
carroge					quadruviu		quadrúviu													285	phonét.								‘carrefour’
catorze					°quatordece	°	quatórdece													273.3, 381	phonét.	quatorze										quatorze
catre					quattuor		quáttuor													251, 289.7	phonét.											quatre
cedre	jud.fr.				cicer		cícer													97.2b, 112, 117.5, 117.7, 329, 346.1	phonét.									Kicher	nha	(pois) chiche
cein					cinge		cínge	2s impér.												134	phonét.											ceins !
ceindre					cingere		cíngere													184, 349	phonét.											ceindre
ceing					cinge		cínge	2s impér.												134	phonét.											ceins !
ceinsis					cinxīsti		cinxī́sti	2s pf												136	phonét.											(tu) ceignis
ceint					cingit		cíngit	part. pass.												97.4	phonét.											ceint
ceinture					cinctūra		cinctū́ra													136, 184, 184.2	phonét.											ceinture
ceire					cicer		cícer													97.2b, 112, 117.5, 117.7, 329, 346.1	phonét.									Kicher	nha	(pois) chiche
celer					cēlāre		cēlā́re													241	phonét.											celer
celui					°(ec)ce + °(il)lūi	°	(éc)ce + (il)lū́i													222.2	phonét.											celui
cemetire		Κοιμητήριον		>	cœmētēriu		cœmētḗriu		,	cīmītēriu		cīmītḗriu		>	°cīmīteriu	°	cīmītériu			179.1, 288.1	savant, adaptation de gr η									cemetery	angl	cimetière
cendre					cinere		cínere													97, 116.3, 250, 292	phonét.											cendre
cengle					cingula		cíngula													349	phonét.											sangle
cengler					singulāre		singulā́re													206.8, 349, 351	en FC substitution de suffixe : ‑ier											sanglier
cens					cēnsu		cḗnsu													291.4	phonét.											cens
cent					centu		céntu													95, 97, 99, 104	phonét.											cent
ceoigne					cicōnia		cicṓnia													322	phonét.											cigogne
cep					cippu		cíppu													182, 264.6, 296, 313.2	phonét.											cep
cercele					querquēdula		querquḗdula		>	°cercēdula	°	cercḗdula								264.2, 345	phonét.											sarcelle
cercelle					querquēdula		querquḗdula		>	°cercēdula	°	cercḗdula								264.2, 345	phonét.											sarcelle
cercle					circulu		círculu													334, 349	phonét.											cercle
cerf					cervu		cérvu													176, 289.6, 374	phonét.											cerf
cerfs	pl				cervu		cérvu													176, 289.6, 374	phonét.											cerf
cerge					cerva		cérva	lc	>	cervia		cérvia								177	phonét.								‘biche’
cerge					cēreu		cḗreu													49, 49.1, 150, 278.1, 279, 287, 371.2	cerge savant, cirge savant et analogique, cierge disputé											cierge
cerise		κέρασοϛ, κερασόϛ		>	cerasia		cerásia	pl	>	°ceresia	°	cerésia								179.4, 237	phonét.											cerise
cerne					circinu		círcinu													67, 258	phonét.											cerne
cervel					cerebellu		cerebéllu													267, 269, 295, 302, 307	phonét.											cerveau
cervoise					cervēsia		cervḗsia													289	phonét.											cervoise
Cervon	Nièvre				Cervedūnum		Cervedū́num													270, 270.3	phonét.											Cervon	Nièvre
ceue					cicūta		cicū́ta													322	phonét.											ciguë
chaable		καταϐολή		>	°catabola	°	catábola													235.4	phonét.								‘châblis’
chaance					cadentia		cadéntia													180, 239.2	cheance analogique											chance
chable					capulu		cápulu													334, 341	phonét.											câble
chable		καταϐολή		>	°catabola	°	catábola													235.4	phonét.								‘châblis’
chacier					°captiāre	°	captiāre													139, 207, 284, 284.3, 284.5	phonét.											chasser
chadaine					capitaneu		capitáneu													270	phonét.								‘capitaine’
chadel					capitellu		capitéllu													266, 267, 270, 270.1	variation								‘chef (militaire)’
chaeignon					°catēniōne	°	catēniṓne													182.2, 235.4, 260.3	variation, croisement avec tignon ?								‘collier’			chignon		X	tignon
chaeine					catēna		catḗna													215, 235.4, 239	phonét.											chaîne
chael					catellu		catéllu													239	phonét.								‘jeune chien’
chael					capitellu		capitéllu													266, 267, 270, 270.1	variation								‘chef (militaire)’
chaelit					°catalectu	°	cataléctu													235.4, 261	phonét.											châlit
Chaelons					Catalaunis		Cataláúnis													235.4, 261, 345	phonét.											Châlons-sur-Marne
chage					cavea		cávea													50, 105.5, 285.2, 298	jaie chute précoce de la labiale, cage emprunt au picard, normand								‘cage’			cage
chaiere					cathedra		cathédra													85, 235.4, 239, 334, 365	phonét.											chaire		,	chaise
chaignon					°catēniōne	°	catēniṓne													182.2, 235.4, 260.3	variation, croisement avec tignon ?								‘collier’			chignon		X	tignon
chaintre					canceru		cánceru													112, 116.3, 139.2, 242.4, 349.2	variation											chancre
chaitif					captīvu		captī́vu		>	°cactīvu	°	cactī́vu								221.4, 313.2	phonét.	chétif										chétif
chalemel					calamellu		calaméllu													239, 248.1	influence labiale											chalumeau
chalenge					calumnia		calúmnia													105.7, 190.1, , 239, 291.3	emprunt, chalenge obscur											challenge		,	calomnie
chalengier					calumniāre		calumniā́re													190.1, 291.3	chalengier obscur								‘accuser’			challenger
chaleur					calōre		calṓre													219.5, 239	phonét.											chaleur
chaloir					calēre		calḗre													239	phonét.											chaloir
chalonge					calumnia		calúmnia													105.7, 190.1, , 239, 291.3	emprunt, chalenge obscur											challenge		,	calomnie
chalongier					calumniāre		calumniā́re													190.1, 291.3	chalengier obscur								‘accuser’			challenger
chals					calce		cálce													112, 256, 259.4, 373	phonét.											chaux
chalt	Fragmentde Valenciennes				calidu		cálidu													252.1, 256, 264.4, 370, 372	phonét.											chaud
chalz					calce		cálce													112, 256, 259.4, 373	phonét.											chaux
Chambray	Eure				Camerācu		Camerā́cu													318.2	phonét.											Chambray	Eure	,	Cambrai	Nord
chambre		καμάρα	‘voûte’	>	camera		cámera		,	camara		cámara								12.3, 59, 93, 105.1, 237, 292, 303.1	phonét.											chambre
chamel					camellu		caméllu													239	phonét.											chameau
chamoil					camēlu		camḗlu													239	phonét.								‘chameau’
chamoire					°camōria	°	camṓria													239	phonét.								‘morve de cheval’
chamorge					°camoria	°	camória													287	évolution retardée (diverses raisons)								‘morve’
champ	sg				campu		cámpu													105.7, 175, 256, 264.4, 356, 372, 374	phonét.											champ
champagne					campānia		campā́nia													175	phonét.											Champagne	région
champignuel					campānia		campā́nia													361.i												champignon
chancelier					cancellāriu		cancellā́riu													182.2, 242.4	phonét.											chancelier
chançon					cantiōne		cantiṓne													97.1, 139, 139.2, 142, 144.1, 148.4, 284	phonét.											chanson
chancre					canceru		cánceru													112, 116.3, 139.2, 242.4, 349.2	variation											chancre
chanel					canāle		canā́le													239	phonét.											canal
chanevuis					°canapūtiu	°	canapū́tiu													192.5, 239	variation											chènevis
change					°cambiu	°	cámbiu													258	phonét.											change
changier					cambiāre		cambiā́re													67, 175, 285	phonét.											changer
chanoine					canonicu		canónicu													239, 272.6, 288	phonét.											chanoine
chanole					°cannabula	°	cannábula													54, 239, 343	phonét.								‘nuque, trachée’
chanonie					canonicu		canónicu													239, 272.6, 288	phonét.											chanoine
chans	pl				campu		cámpu													105.7, 175, 256, 264.4, 356, 372, 374	phonét.											champ
chantai					cantāvi		cantā́vi	1s pf												224.3, 234	phonét.											(je) chantai
chante					cantat		cántat	3s												236	phonét.											(il) chante
chantent					cantant		cántant	3p												159.1, 236	phonét.											(ils) chantent
chanteor					cantātōre		cantātṓre													175, 219.5	phonét.											chanteur
chanter					cantāre		cantā́re													12, 105.1, 264, 266	phonét.											chanter
chanteur					cantātōre		cantātṓre													175, 219.5	phonét.											chanteur
Chantilly					Cantiliācu		Cantiliā́cu													207.1c	phonét.											Chantilly
chantomps					cantāmus		cantā́mus	1p												292.8	variation (graphique)											(nous) chantons
chantre	CSs				cantor		cántor	nom sg												251, 329	phonét.											chantre
chanve		κάνναϐιϛ		>	cannabim		cánnabim	lc	>	°canapu	°	cánapu		,	°canape	°	cánape			237, 259, 269	phonét., apophonét.onie											chanvre
chanvre		κάνναϐιϛ		>	cannabim		cánnabim	lc	>	°canapu	°	cánapu		,	°canape	°	cánape			237, 259, 269	phonét., apophonét.onie											chanvre
chaoir					cadere		cádere	lc	>	°cadēre	°	cadḗre								239.2	cheoir analogique											choir
chaon					°kāda	°	kāda													105	phonét.								‘lard grillé’
chape					cappa		cáppa													105.7, 296	phonét.											chape
chapeaux	pl				cappellu		cappéllu	acc sg	,	cappellōs		cappéllōs	acc pl							127, 137, 181	variation											chapeau		,	chapeaux
chapel	sg				cappellu		cappéllu	acc sg	,	cappellōs		cappéllōs	acc pl							127, 137, 181	variation											chapeau		,	chapeaux
chapiaux	pl				cappellu		cappéllu	acc sg	,	cappellōs		cappéllōs	acc pl							127, 137, 181	variation											chapeau		,	chapeaux
chapitele					capitulu		capítulu													65.2, 68.2, 345.4, 371	substitution de sonante											chapitre
chapitle					capitulu		capítulu													65.2, 68.2, 345.4, 371	substitution de sonante											chapitre
chapitre					capitulu		capítulu													65.2, 68.2, 345.4, 371	substitution de sonante											chapitre
char					carru		cárru													105, 107, 173.1, 200, 244, 255, 291.4	phonét.											char
char	Rol				carne		cárne													374												chair
charai					caragiu		carágiu													239	phonét.								‘sortilège’
charbon					carbōne		carbṓne													220.1	phonét.											charbon
charcre					carcere		cárcere													93, 112, 116.1, 116.2, 139, 139.2, 142, 349, 349.2	variation											chartre
Charle					Carolu		Cárolu													259, 259.5, 370	phonét.											Charles
charme					carmen		cármen													291.3	phonét.											charme
charme	arbre				carpinu		cárpinu													244, 258, 258.1, 291.3, 292.10	phonét.											charme	arbre
charmer					carmināre		carminā́re													291.3	phonét.								‘enchanter’
charne					cardine		cárdine													67, 68.1	phonét.											carne	‘gond’
charnel					carnāle		carnā́le													206.8	phonét.											charnel
charogne					°carōnia	°	carṓnia													188, 239	phonét.											charogne
charrue					carrūca		carrū́ca													322	phonét.											charrue
charruer					°carrūcāre	°	carrūcā́re													128	phonét.											charrier
charruier					°carrūcāre	°	carrūcā́re													128	phonét.											charrier
charte					cāritāte		cāritā́te													206.7	phonét.											cherté
chartre					cartula		cártula													334, 348	phonét.											charte
chartre					carcere		cárcere													93, 112, 116.1, 116.2, 139, 139.2, 142, 349, 349.2	variation											chartre
Chartres					°Cartunes	°	Cártunes													68, 250.1	substitution de sonante											Chartres
chasel					casālis		casā́lis													239	phonét.								‘métairie’
chasse					capsa		cápsa													298	phonét.											châsse
chastaigne					castanea		castánea													175	phonét.											châtaigne
chaste					casta		cásta													175.5	savant											chaste
chasteaux	pl				castellu		castéllu		,	°castellōs	°	castéllōs	acc pl							175, 181, 303	variation									castle	angl	château
chastel					castellu		castéllu		,	°castellōs	°	castéllōs	acc pl							175, 181, 303	variation									castle	angl	château
chastiaux	pl				castellu		castéllu		,	°castellōs	°	castéllōs	acc pl							175, 181, 303	variation									castle	angl	château
chastie					castīgat		castī́gat	3s												323	phonét.											(il) châtie
chastiier					castigāre		castigā́re													93.1, 175, 267, 271, 323	phonét.											châtier
chat					cattu		cáttu													255	phonét.											chat
chataigne					capitaneu		capitáneu													270	phonét.								‘capitaine’
chatel					capitāle		capitā́le													173	phonét.											cheptel
chaucier					calceāre		calceāre													207, 283	phonét.											chausser
chaud					calidu		cálidu													252.1, 256, 264.4, 370, 372	phonét.											chaud
chaude					calda		cálda													175	phonét.											chaude
chaudiere					caldāria		caldā́ria													174.2, 175	évolution suffixe obscure											chaudière
chauf					calvu		cálvu													289.6	phonét.											chauve
chaume		κάλαμοϛ		>	calamu		cálamu													237, 259, 291	phonét., apophonét.onie											chaume
chaussier					calceāre		calceāre													207, 283	phonét.											chausser
chauve					calva		cálva													289	phonét.											chauve
chauz					calce		cálce													112, 256, 259.4, 373	phonét.											chaux
chavez					capitiu		capítiu													239, 283.6	savant											chevet
cheance					cadentia		cadéntia													180, 239.2	cheance analogique											chance
chef					caput		cáput		>	°capu	°	cápu								254, 306, 311, 313.2, 385	phonét.	chief										chef
chemin					°camīnu	°	camī́nu													239	phonét.											chemin
cheminee					camīnāta		camīnā́ta													239	phonét.											cheminée
chemise					camīsia		camī́sia													191, 239	phonét.											chemise
chenel					canāle		canā́le													206.8	substitution de suffixe : savant ‑al											chenal
chenevis					°canapūtiu	°	canapū́tiu													192.5, 239	variation											chènevis
chenil					°canīle	°	canī́le													239	phonét.											chenil
chenille					canīcula		canī́cula													236, 239	phonét.											chenille
chenoine					canonicu		canónicu													239, 272.6, 288	phonét.											chanoine
chenole					°cannabula	°	cannábula													54, 239, 343	phonét.								‘nuque, trachée’
cheoir					cadere		cádere	lc	>	°cadēre	°	cadḗre								239.2	cheoir analogique											choir
cher					cāru		cā́ru													100.1, 105.1, 200, 200.4, 206.7, 207, 244, 307, 331, 350, 385	phonét.	chier										cher
cherra					caderat		caderát	3s fut												344	phonét.											(il) choira
cherte					cāritāte		cāritā́te													206.7	phonét.											cherté
ches					casa		cása		,	casu ?		cásu ?								260.5	chies, ches proclise, analogie ou < casu								‘maison’			chez	cf. toponyme La Chaise-Dieu
chese					casa		cása		,	casu ?		cásu ?								260.5	chies, ches proclise, analogie ou < casu								‘maison’			chez	cf. toponyme La Chaise-Dieu
cheu					°cadūtu	°	cadū́tu	part	,	°cadūta	°	cadū́ta								222.3, 239, 239.2, 240	phonét.											chu
cheval					caballu		cabállu													105.1, 173, 232, 238, 239, 244, 255, 291.4, 307, 310.1, 331, 384.iv	phonét.	cheval										cheval
chevalier					caballāriu		caballā́riu													174.2	obscur											chevalier
chevals					caballōs		cabállōs	acc. pl												307, 310.1	phonét.											chevaux
chevaucher					caballicāre		caballicā́re													175	phonét.											chevaucher
chevaus					caballōs		cabállōs	acc. pl												307, 310.1	phonét.											chevaux
chevauzt					caballicet		cabállicet	3s subj												67.7	phonét.											(qu’il) chevauche
chevel					capillu		capíllu													239, 296.5, 307.3	analogique											cheveu
cheveleure					capillātūra		capillātū́ra													236	phonét.											chevelure
chevesne					°capitine	°	capítine													299	phonét.											chevesne
chevestre					capistru		capístru													140, 182, 239, 319	phonét.											chevêtre
chevetaigne					capitāneu		capitā́neu													105.7	emprunt											capitaine
cheveus					capillos		capíllos													184	phonét.											cheveux
chevez					capitiu		capítiu													239, 283.6	savant											chevet
[truncated: 2,942 more rows]

## Sheet: par forme MF
MF	MF attr.	grec	grec attr.	.	étymon 1 tonique soulignée	étymon 1 astérisque	étymon 1 tonique accent aigu	étymon 1 attr.	.	étymon 2 tonique soulignée	étymon 2 astérisque	étymon 2 tonique accent aigu	étymon 2 attr.	.	étymon 3 tonique soulignée	étymon 3 astérisque	étymon 3 tonique accent aigu	étymon 3 attr.	.	renvois	type chgt	AF1	AF1 attr.	.	AF2	AF2 attr.	.	AF3	AF3 attr.	.	AF4	AF4 attr.	.	AF5	.	AF6	.	AF7	.	AF8	.	AF9	Sé (AF ou MF)	germ. mod.	germ. mod. attr.	FC1	FC1 attr.	.	FC2
[truncated: 218 more rows]
[truncated: 11 more columns]

[truncated: 1 more sheets: par forme FC]
